# Supplementary material
Source: publisher figshare collection journal article supplement (https://acs.figshare.com/ndownloader/files/4485190)

# Enantioselective Total Synthesis of (+)-Conicol via Cascade Three-Component Organocatalysis.

Bor-Cherng Hong,\* Prakash Kotame, Chih-Wei Tsai, and Ju-Hsiou Liao

*Department of Chemistry and Biochemistry, National Chung Cheng University, Chia-Yi, 6, Taiwan, R.O.C.*

*chebch@ccu.edu.tw*

## SUPPORTING INFORMATION:

|                                                                                             |              |
|---------------------------------------------------------------------------------------------|--------------|
| Contents: (1) Experimental procedures and characterization data for compounds <b>4-21</b> . | Page 1-17    |
| (2) Spectra data for compounds <b>4-21</b> .                                                | Page 18-110  |
| (3) <i>Ee</i> analysis by HPLC with chiral column.                                          | Page 111-122 |

**General Procedure.** All solvents were reagent grade. L-proline (99+%) was purchased from Bachem. Other chemicals were purchased from Aldrich or Acros Chemical Co. Reactions were normally carried out under argon atmosphere in flame-dried glassware. Merck silica gel 60 (particle size 0.04-0.063 mm) was employed for flash chromatography. Melting points are uncorrected. <sup>1</sup>H NMR spectra were obtained in CDCl<sub>3</sub> unless otherwise noted at 400 MHz (Bruker DPX-400) or 500 MHz (Varian-Unity INOVA-500). <sup>13</sup>C NMR spectra were obtained at 100 MHz or 125 MHz. *E.e.* values were measured by HPLC on a chiral column (chiralpak IA or chiralcel OD-H, 0.46 cm ID x 25 cm, particle size 5 μ) by elution with IPA-hexane or THF-hexane. The flow rate of the indicated elution solvent is maintained at 1 mL/min, and the retention time of a compound is recorded accordingly. HPLC was equipped with the ultraviolet and refractive index detectors. The melting point was recorded on a melting point apparatus (MPA100 – Automated melting point system, Stanford Research Systems, Inc.) and is uncorrected. The optical rotation values were recorded with a Jasco-P-2000 digital polarimeter

### Preparation of 4.

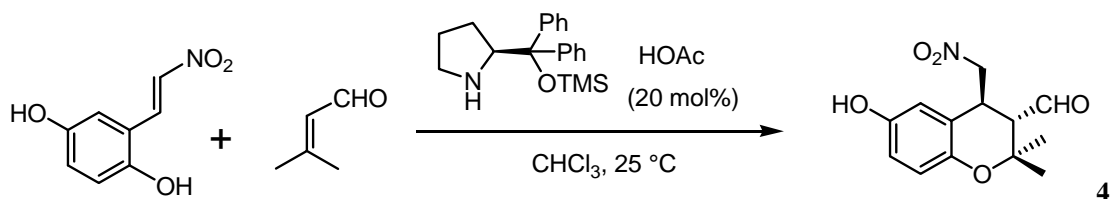

To a solution of 3-methylbut-2-enal (696 mg, 8.28 mmol), (*S*)-diphenylprolinol-*O*-TMS-ether (358 mg, 1.10 mmol) and acetic acid (60 mg, 1.10 mmol) in  $\text{CHCl}_3$  (25 mL) was added 2-((*E*)-2-nitrovinyl)benzene-1,4-diol (1.00 g, 5.52 mmol). The resulting solution was stirred at 25 °C for 1 h, and diluted with EtOAc (50 mL). The solution was washed with brine (20 mL), dried over  $\text{MgSO}_4$ , and concentrated *in vacuo* to give the crude product. The residue was purified by flash column chromatography with 20% EtOAc-Hexane ( $R_f$  = 0.33 for **4** in 30% EtOAc-hexane) to give **4** as yellow solid (1100 mg, 76% yield): mp 96-98 °C. Selected spectroscopic data for **4**:  $[\alpha]_D^{26} +31.2$  (c 1  $\text{CHCl}_3$ ); IR (neat): 3420, 2980, 1718, 1552, 1375, 1150, 927  $\text{cm}^{-1}$ ;  $^1\text{H}$  NMR ( $\text{CDCl}_3$ , 500 MHz):  $\delta$  9.87 (s, 1 H), 6.73-6.64 (m, 3H), 4.70-4.59 (m, 2 H), 3.94 (dt,  $J$  = 4.9, 10.1 Hz, 1 H), 3.18 (d,  $J$  = 10.5 Hz, 1 H), 1.65 (s, 3 H), 1.10 (s, 3 H);  $^{13}\text{C}$  NMR ( $\text{CDCl}_3$ , 125 MHz):  $\delta$  200.3 (CH), 149.9 (C), 146.6 (C), 119.7 (C), 119.2 (CH), 116.5 (CH), 113.0 (CH), 77.8 ( $\text{CH}_2$ ), 74.3 (C), 57.5 (CH), 31.3 (CH), 28.4 ( $\text{CH}_3$ ), 21.1 ( $\text{CH}_3$ ); MS ( $m/z$ , relative intensity): 265 ( $\text{M}^+$ , 100), 218 (46), 203 (28), 175 (95), 147 (42), 136 (47); exact mass calcd for  $\text{C}_{13}\text{H}_{15}\text{NO}_5$  ( $\text{M}^+$ ): 265.0950; found 265.0949.

### Preparation of 5

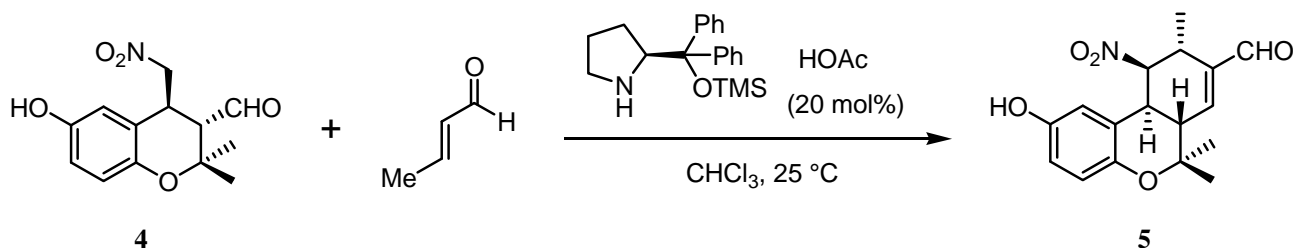

To a solution of **4** (59 mg, 0.22 mmol), (*S*)-diphenylprolinol-*O*-TMS-ether (15 mg, 0.046 mmol) and acetic acid (2.8 mg, 0.046 mmol) in  $\text{CHCl}_3$  (3.0 mL) was added crotonaldehyde (16 mg, 0.23 mmol). The resulting solution was stirred at ambient temperature for 12 h, and added another crotonaldehyde (16 mg, 0.23 mmol). The resulting mixture was stirred at ambient temperature for 12 h and diluted with EtOAc (10 mL). The solution was washed with brine (2 mL), dried over  $\text{Na}_2\text{SO}_4$ , and concentrated *in vacuo* to give the crude product. The residue was purified by flash column chromatography with 30 % EtOAc-hexane ( $R_f$  = 0.35 in 30% EtOAc-hexane) to give **5** (white solid, 52 mg, 74% yield); mp. 75-78 °C. Selected data for **5**:  $[\alpha]_D^{22} -107.6$  (c 2.95  $\text{CHCl}_3$ ); IR (neat): 3381, 2976, 2931, 1682, 1549, 1492, 1455, 1372  $\text{cm}^{-1}$ ;  $^1\text{H}$  NMR ( $\text{CDCl}_3$ , 500 MHz):  $\delta$  9.47 (s, 1 H), 6.77

(d,  $J = 8.5$  Hz, 1 H), 6.64 (dd,  $J = 2.3, 8.4$  Hz, 1 H), 6.53 (br. s., 1 H), 6.23 (br. s., 1 H), 4.92 (dd,  $J = 5.7, 12.1$  Hz, 1 H), 3.59 - 3.48 (m, 2 H), 2.33 (d,  $J = 10.7$  Hz, 1 H), 1.46 (s, 3 H), 1.34 (s, 3 H), 1.07 (d,  $J = 6.8$  Hz, 3 H);  $^{13}\text{C}$  NMR ( $\text{CDCl}_3$ , 125 MHz):  $\delta$  191.5 (CH), 150.2 (C), 147.2 (C), 145.3 (CH), 143.4 (C), 129.5 (C), 119.0 (CH), 114.9 (CH), 109.3 (CH), 85.3 (CH), 78.9 (C), 50.8 (CH), 31.5 (CH), 30.8 (CH), 28.2 ( $\text{CH}_3$ ), 24.1 ( $\text{CH}_3$ ), 15.6 ( $\text{CH}_3$ ); MS ( $m/z$ , relative intensity): 317 ( $\text{M}^+$ , 53), 270 (18), 255 (100), 241 (48), 227 (14), 105 (12), 91 (11); exact mass calcd for  $\text{C}_{17}\text{H}_{19}\text{NO}_5$  ( $\text{M}^+$ ): 317.1263; found 317.1265.

### One-pot procedure for the preparation of **5**.

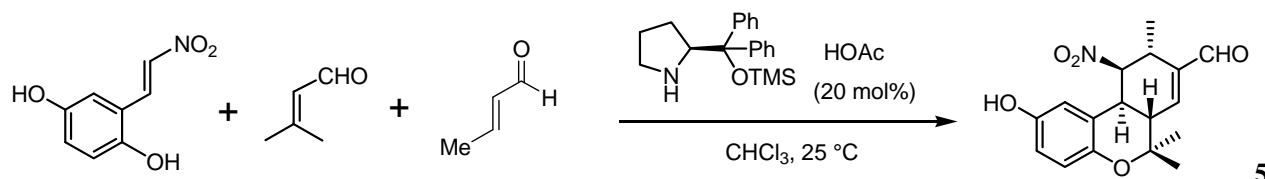

#### (Method A)

To a solution of 2-((*E*)-2-nitrovinyl)benzene-1,4-diol (41.7 mg, 0.23 mmol) (*S*)-diphenyl-prolinol-*O*-TMS-ether (15 mg, 0.046 mmol) and acetic acid (2.8 mg, 0.046 mmol) in  $\text{CHCl}_3$  (2.5 mL) was added 3-methylbut-2-enal (19.3 mg, 0.23 mmol). The resulting solution was stirred at 25 °C for 1.2 h, followed by the addition of crotonaldehyde (16.1 mg, 0.23 mmol) and stirred for additional 12 h at ambient temperature. To this solution was added crotonaldehyde (16.1 mg, 0.23 mmol), the mixture was stirred at ambient temperature for additional 12 h. The solution was diluted with EtOAc (10 mL), washed with brine (2 mL), dried over  $\text{Na}_2\text{SO}_4$ , and concentrated *in vacuo* to give the crude product. The residue was purified by flash column chromatography with 30 % EtOAc-hexane ( $R_f = 0.35$  in 30% EtOAc-hexane) to give **5** (white solid, 48 mg, 66% yield).

#### (Method B)

To a solution of 2-((*E*)-2-nitrovinyl)benzene-1,4-diol (41.7 mg, 0.23 mmol) (*S*)-diphenyl-prolinol-*O*-TMS-ether (15 mg, 0.046 mmol) and acetic acid (2.8 mg, 0.046 mmol) in  $\text{CHCl}_3$  (2.5 mL) was added 3-methylbut-2-enal (19.3 mg, 0.23 mmol). The resulting solution was stirred at 25 °C for 5 min, followed by the addition of crotonaldehyde (16.1 mg, 0.23 mmol) and stirred for additional 12 h at ambient temperature. To this solution was added crotonaldehyde (16.1 mg, 0.23 mmol), the mixture was stirred at ambient temperature for additional 12 h. The solution was diluted with EtOAc (10 mL), washed with brine (2 mL), dried over  $\text{Na}_2\text{SO}_4$ , and concentrated *in vacuo* to give the crude product. The residue was purified by flash column chromatography with 30 % EtOAc-hexane ( $R_f = 0.35$  in 30% EtOAc-hexane) to give **5** (white solid, 23 mg, 32% yield).

## Preparation of 7

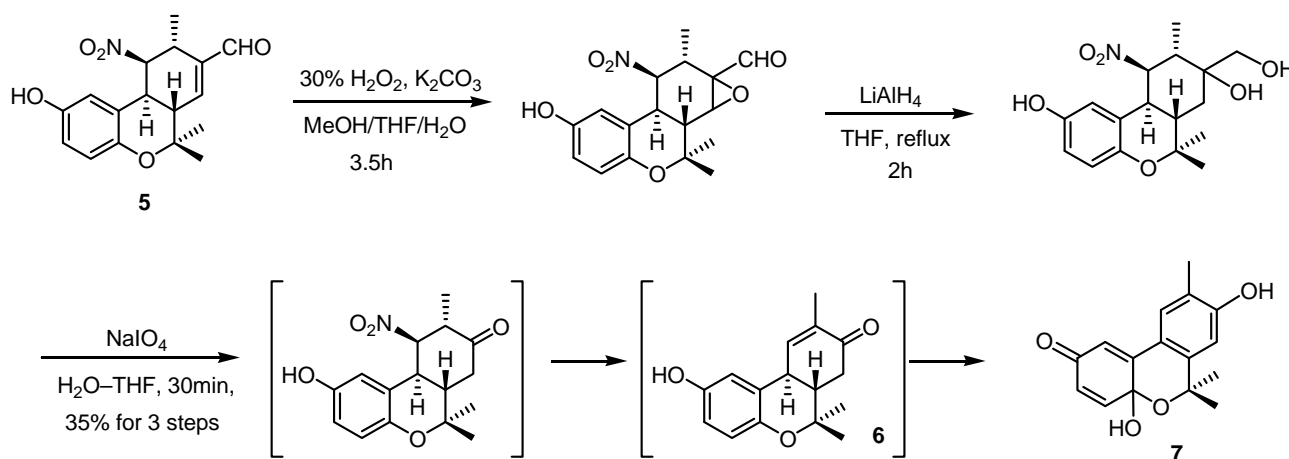

To a solution of **5** (50.0 mg, 0.158 mmol),  $\text{K}_2\text{CO}_3$  (44 mg, 0.32 mmol) and  $\text{H}_2\text{O}$  (0.2 mL) in  $\text{MeOH}-\text{THF}$  (1:1, 1 mL) was added dropwise at 0 °C a solution of 30–35%  $\text{H}_2\text{O}_2$  (0.03 mL, 0.31 mmol). The resulting mixture was stirred at ambient temperature for 3.5 h and diluted with  $\text{EtOAc}$  (10 mL). The solution was washed with brine (2 mL), dried over  $\text{Na}_2\text{SO}_4$ , and concentrated *in vacuo* to give the crude product. The residue was directly used for the next-step reaction without further purification.

To a solution of crude epoxide product in dry  $\text{THF}$  (4 mL) was added  $\text{LiAlH}_4$  (24 mg, 0.63 mmol). The solution was heated to reflux under nitrogen for 2 h, and the reaction was quenched by the addition of  $\text{EtOAc}$  (20 mL) and aqueous solution of  $\text{NH}_4\text{Cl}$ . The solution was washed with brine (5 mL), dried over  $\text{Na}_2\text{SO}_4$ , and concentrated *in vacuo* to give the crude product. A solution of the crude diol product in  $\text{THF}$  (0.3 mL) was added to a stirred solution of  $\text{NaIO}_4$  (34 mg, 0.16 mmol),  $\text{H}_2\text{O}$  (2 mL) and  $\text{THF}$  (0.5 mL) at room temperature. The resulting mixture was stirred at ambient temperature for 0.5 h and diluted with  $\text{EtOAc}$  (20 mL). The solution was washed with brine (2 mL), dried over  $\text{Na}_2\text{SO}_4$ , and concentrated *in vacuo* to give the crude product. The residue was purified by flash column chromatography with 40 %  $\text{EtOAc}$ -hexane ( $R_f = 0.31$  in 50%  $\text{EtOAc}$ -hexane) to give **7** (yellow solid, 14 mg, 35% overall yield from **5**): mp. 135–137 °C. Selected data for **7**: IR (neat): 3381, 2976, 2931, 1682, 1549, 1492, 1455, 1372, 1281  $\text{cm}^{-1}$ ;  $^1\text{H}$  NMR ( $\text{CDCl}_3$ , 500 MHz):  $\delta$  7.36 (s, 1 H), 6.80 (d,  $J = 10.0$  Hz, 1 H), 6.67 (s, 1 H), 6.32 (d,  $J = 1.2$  Hz, 1 H), 6.18 (dd,  $J = 1.5, 10.0$  Hz, 1 H), 2.26 (s, 3 H), 1.76 (s, 3 H), 1.40 (s, 3 H);  $^{13}\text{C}$  NMR ( $\text{CDCl}_3$ , 125 MHz):  $\delta$  186.4 (C), 157.1 (C), 149.2 (C), 144.4 (CH), 143.2 (C), 128.2 (CH), 127.3 (CH), 124.2 (C), 119.2 (C), 116.6 (CH), 111.3 (CH), 87.7 (C), 76.1 (C), 33.8 ( $\text{CH}_3$ ), 31.7 ( $\text{CH}_3$ ), 15.6 ( $\text{CH}_3$ ); MS ( $m/z$ , relative intensity): 272 ( $\text{M}^+$ , 62), 257 (58), 241 (100), 215 (60), 175 (51), 147 (29), 115 (16); exact mass calcd for  $\text{C}_{16}\text{H}_{16}\text{O}_4$  ( $\text{M}^+$ ): 272.1049; found 272.1050.

## Representative procedure for the preparation of 8.

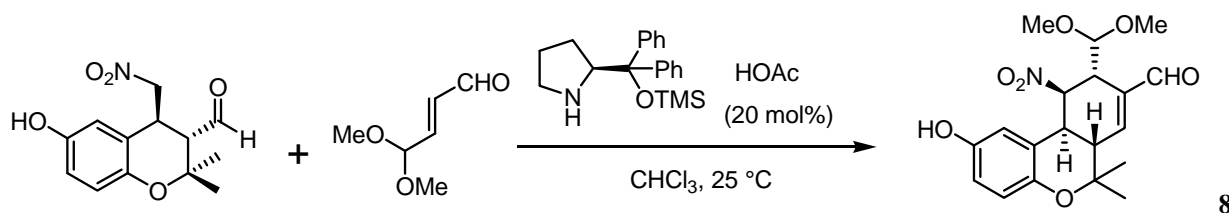

To a solution of (E)-4,4-dimethoxybut-2-enal (982 mg, 7.54 mmol), (S)-diphenyl-prolinol-O-TMS-ether (245 mg, 0.75 mmol) and acetic acid (45 mg, 0.75 mmol) in CHCl<sub>3</sub> (25 mL) was added compound **4** (1000 mg, 3.77 mmol). The resulting solution was stirred at 25 °C for 35 h, and diluted with EtOAc (50 mL). The solution was washed with brine (20 mL), dried over MgSO<sub>4</sub>, and concentrated *in vacuo* to give the crude product. The residue was purified by flash column chromatography with 25% EtOAc-Hexane (*R<sub>f</sub>* = 0.22 for **3** in 30% EtOAc-hexane) to give **3** as yellow solid (990 mg, 69% yield): mp 56-59 °C. Selected spectroscopic data for **3**: [ $\alpha$ ]<sub>D</sub><sup>25</sup> -159.3 (c 1.4 CHCl<sub>3</sub>); IR (neat): 3413, 2974, 2838, 1687, 1647, 1553, 1371, 755 cm<sup>-1</sup>; <sup>1</sup>H NMR (CDCl<sub>3</sub>, 500 MHz):  $\delta$  9.52 (s, 1 H), 6.77 (d, *J* = 8.5 Hz, 1 H), 6.68 (br. s., 1 H), 6.63 (d, *J* = 8.1 Hz, 1 H), 6.24 (br. s., 1 H), 4.91 (dd, *J* = 6.0, 11.6 Hz, 1 H), 4.26 (d, *J* = 2.9 Hz, 1 H), 4.01 (t, *J* = 11.1 Hz, 1 H), 3.86 (br. s., 1 H), 3.39 (s, 3 H), 3.35 (s, 3 H), 2.25 (d, *J* = 10.7 Hz, 1 H), 1.46 (s, 3 H), 1.36 (s, 3 H); <sup>13</sup>C NMR (CDCl<sub>3</sub>, 125 MHz):  $\delta$  190.8 (CH), 150.1 (C), 147.1 (C), 146.4 (CH), 137.6 (C), 130.0 (C), 118.9 (CH), 114.6 (CH), 109.3 (CH), 104.6 (CH), 83.5 (CH), 79.0 (C), 56.4 (CH<sub>3</sub>), 56.2 (CH<sub>3</sub>), 50.7 (CH), 38.0 (CH), 33.5 (CH), 28.4 (CH<sub>3</sub>), 23.8 (CH<sub>3</sub>); MS (*m/z*, relative intensity): 377 (M<sup>+</sup>, 6), 265 (6), 227 (4), 175 (5), 147 (4), 75 (100); exact mass calcd for C<sub>19</sub>H<sub>23</sub>NO<sub>7</sub> (M<sup>+</sup>): 377.1475; found 377.1475.

### One-pot procedure for the preparation of **8**.

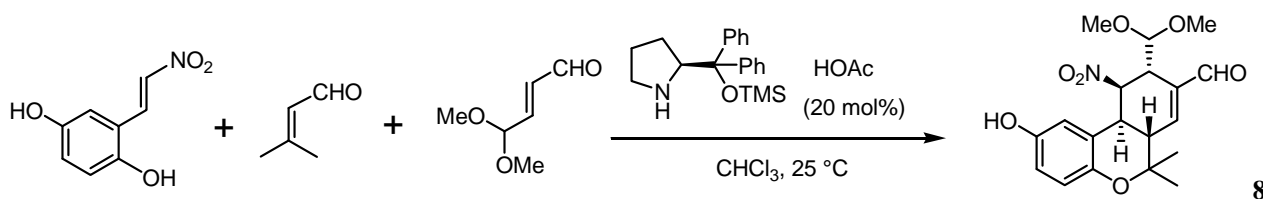

To a solution of 3-methylbut-2-enal (24 mg, 0.29 mmol), (S)-diphenyl-prolinol-O-TMS-ether (13 mg, 0.03 mmol) and acetic acid (2 mg, 0.03 mmol) in CHCl<sub>3</sub> (4 mL) was added 2-((E)-2-nitrovinyl)benzene-1,4-diol (35 mg, 0.19 mmol). The resulting solution was stirred at 25 °C for 1 h, followed by the addition of (E)-4,4-dimethoxybut-2-enal (50 mg, 0.39 mmol) and stirred for additional 35h at ambient temperature. The solution was diluted with EtOAc (15 mL), washed with brine (5 mL), dried over MgSO<sub>4</sub> and concentrated *in vacuo* to give the crude product. The residue was purified by flash column chromatography with 25% EtOAc-Hexane (*R<sub>f</sub>* = 0.22 for **8** in 30% EtOAc-hexane) to give **8** as yellow solid (40 mg, 55% overall yield).

### Preparation of **9**

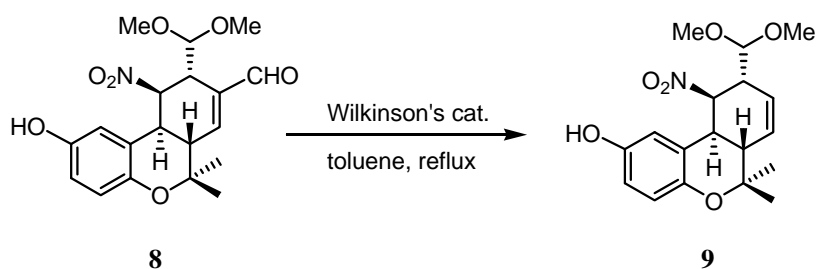

To a solution of **8** (600 mg, 1.59 mmol) in toluene (15 mL) was added Wilkinson's catalyst (1.42 g, 1.59 mmol). The resulting solution was heated to reflux for 4 h, followed by the dilution with EtOAc (30 mL). The solution was filtered through celite, and concentrated *in vacuo* to give the crude product. The residue was purified by flash column chromatography with 20% EtOAc-hexane ( $R_f = 0.40$  for **9** in 30% EtOAc-hexane) to give **9** as a pale yellow solid (300 mg, 54% yield): mp 206-209 °C. Selected spectroscopic data for **9**:  $[\alpha]_D^{25} -92.4$  (c 0.5 CHCl<sub>3</sub>); IR (neat): 3395, 2977, 2838, 1591, 1372, 1219, 1067, 756 cm<sup>-1</sup>; <sup>1</sup>H NMR (CDCl<sub>3</sub>, 500 MHz):  $\delta$  6.70-6.62 (m, 3 H), 6.03-5.87 (m, 2 H), 5.21 (t,  $J = 7.3$  Hz, 1 H), 4.62 (br. s., 1 H), 4.28 (d,  $J = 6.6$  Hz, 1 H), 3.38 (d,  $J = 3.2$  Hz, 6 H), 3.23-3.18 (m, 1 H), 2.90 (br. s., 1 H), 2.11 (d,  $J = 11.5$  Hz, 1 H), 1.43 (s, 3 H), 1.22 (s, 3 H); <sup>13</sup>C NMR (CDCl<sub>3</sub>, 125 MHz):  $\delta$  149.4 (C), 146.9 (C), 129.3 (CH), 126.0 (CH), 125.3 (C), 118.5 (CH), 115.4 (CH), 111.8 (CH), 104.1 (CH), 87.9 (CH), 77.4 (C), 56.0 (CH<sub>3</sub>), 54.0 (CH<sub>3</sub>), 45.1 (CH), 41.9 (CH), 38.5 (CH), 28.3 (CH<sub>3</sub>), 21.4 (CH<sub>3</sub>); MS ( $m/z$ , relative intensity): 349 ( $M^+$ , 15), 325 (57), 269 (10), 227 (14), 115 (6), 77 (5), 75 (100); exact mass calcd for C<sub>18</sub>H<sub>23</sub>NO<sub>6</sub> ( $M^+$ ): 349.1525; found 349.1525.

### Preparation of **10**

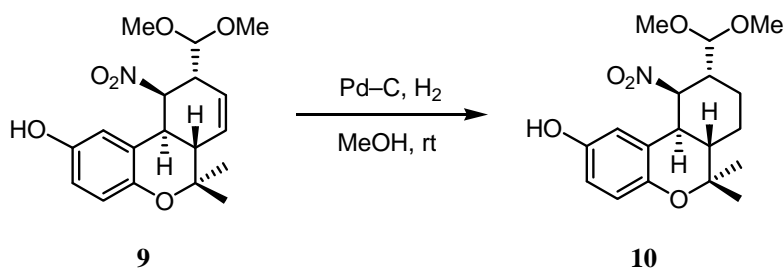

A suspension of **9** (300 mg, 0.85 mmol) and Pd-C (150 mg, 10%) in MeOH (10 mL) was stirred at room temperature under hydrogen (1 atm) for 1 h. The mixture was filtered through Celite, and the filtrate was concentrated *in vacuo* to give the crude product. The crude residue was purified by silica gel flash column chromatography with 20% EtOAc-hexane ( $R_f = 0.40$  for **10** in 30% EtOAc-hexane) to give **10** as a white solid (215 mg, 72% yield): mp 142-145 °C. Selected spectroscopic data for **10**:  $[\alpha]_D^{25} +50.1$  (c 0.8 CHCl<sub>3</sub>); IR (neat): 3373, 2936, 1548, 1370, 1218, 1060, 768 cm<sup>-1</sup>; <sup>1</sup>H NMR (CDCl<sub>3</sub>, 500 MHz):  $\delta$  6.66 (s, 2 H), 6.42 (s, 1 H), 5.01-4.96 (m,  $J = 8.1$  Hz, 1 H), 4.94 (s, 1 H), 4.20 (d,  $J = 6.8$  Hz, 1 H), 3.41-3.36 (m, 1H), 3.35 (s, 6 H), 2.50-2.45 (m, 1 H), 2.13-2.04 (m,  $J = 12.0$  Hz,

1 H), 1.79-1.70 (m, 1 H), 1.67 (td,  $J = 4.9, 12.1$  Hz, 2 H), 1.55-1.47 (m, 1 H), 1.35 (s, 3 H), 1.19 (s, 3 H);  $^{13}\text{C}$  NMR ( $\text{CDCl}_3$ , 125 MHz):  $\delta$  149.3 (C), 146.8 (C), 124.7 (C), 118.4 (CH), 115.6 (CH), 111.8 (CH), 104.2 (CH), 89.4 (CH), 77.5 (C), 55.7 ( $\text{CH}_3$ ), 53.6 ( $\text{CH}_3$ ), 41.2 (CH), 39.7 (CH), 36.3 (CH), 27.9 ( $\text{CH}_3$ ), 21.8 ( $\text{CH}_2$ ), 19.9 ( $\text{CH}_3$ ), 19.5 ( $\text{CH}_2$ ); MS ( $m/z$ , relative intensity): 351 ( $\text{M}^+$ , 21), 325 (53), 279 (23), 239 (34), 219 (29), 191 (65), 107 (67), 95 (39), 77 (41), 75 (92), 57 (64); exact mass calcd for  $\text{C}_{18}\text{H}_{25}\text{NO}_6$  ( $\text{M}^+$ ): 351.1682; found 351.1683.

### Preparation of **11**

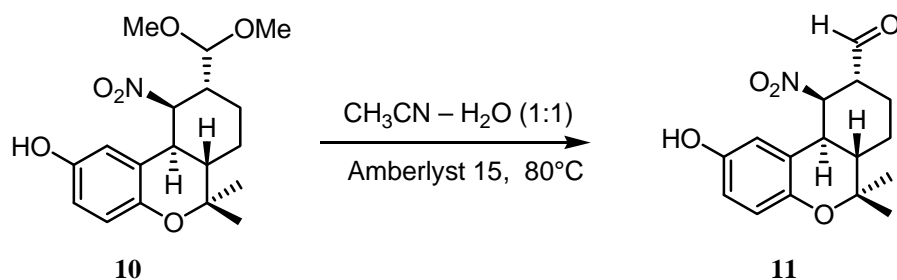

To a solution of **10** (100 mg, 0.28 mmol) in  $\text{CH}_3\text{CN}-\text{H}_2\text{O}$  (1:1, 6 mL) was added Amberlyst 15 (50 mg). The resulting solution was heated to  $80^\circ\text{C}$  and stirred at the same temperature for 5 h. After cooling to room temperature, the solution was diluted with EtOAc (15 mL), washed with brine (5 mL), dried over  $\text{MgSO}_4$ , and concentrated *in vacuo* to give the crude product. To the crude residue  $\text{CHCl}_3$  was added (0.5 mL), followed by the addition of hexane (2 mL), and lead to the formation of solid precipitation. After decanting the solvent, the precipitate was dried under *vacuo* ( $R_f = 0.28$  for **11** in 30% EtOAc-hexane) to give pure **11** as a pale yellow solid along with the recovery of 20 mg of pure **10** in solvent layer (48 mg, 69% yield, based on the recovered **10**): mp  $191-193^\circ\text{C}$ . Due to the instability of **11** in solution (decomposition), the above procedure, the incomplete transformation as well as the precipitation of product, was adapted for the routine preparation and purification. Purification of **11** by silica gel chromatography led to the decomposition of product. However, **11** was stable in solid form for months as long as it is not in solution or in silica gel condition. Selected spectroscopic data for **11**:  $[\alpha]_{\text{D}}^{25} -15.4$  (c 0.15 EtOAc); IR (neat): 3377, 2930, 1698, 1547, 1370, 1226, 1138,  $768\text{ cm}^{-1}$ ;  $^1\text{H}$  NMR ( $\text{CD}_3\text{CN}$ , 500 MHz):  $\delta$  9.85 (d,  $J = 2$  Hz, 1 H), 6.61 (s, 2 H), 6.28 (s, 1 H), 5.07 (dd,  $J = 5.2, 10.4$  Hz, 1 H), 3.55 (t,  $J = 11.2$  Hz, 1 H), 3.35 (d,  $J = 3.9$  Hz, 1H), 1.90-1.80 (m, 1 H), 1.78-1.72 (m, 1 H), 1.64 (td,  $J = 3.7, 12.3$  Hz, 1 H), 1.61-1.30 (m, 1 H), 1.31 (s, 3H), 1.20-1.18 (m, 1 H), 1.17 (s, 3H);  $^{13}\text{C}$  NMR ( $\text{CD}_3\text{CN}$ , 125 MHz):  $\delta$  202.3 (CH), 151.4 (C), 147.5 (C), 125.3 (C), 119.3 (CH), 116.4 (CH), 112.3 (CH), 89.1 (CH), 78.1 (C), 50.3 (CH), 46.2 (CH), 36.3 (CH), 28.5 ( $\text{CH}_3$ ), 24.2 ( $\text{CH}_2$ ), 23.0 ( $\text{CH}_2$ ), 21.2 ( $\text{CH}_3$ ); MS ( $m/z$ , relative intensity): 305 ( $\text{M}^+$ , 52), 258 (62), 229 (100), 215 (31), 187 (26), 161 (28), 107 (6), 105 (6), 77 (10); exact mass calcd for  $\text{C}_{16}\text{H}_{19}\text{NO}_5$  ( $\text{M}^+$ ): 305.1263; found 305.1260.

## Preparation of 12

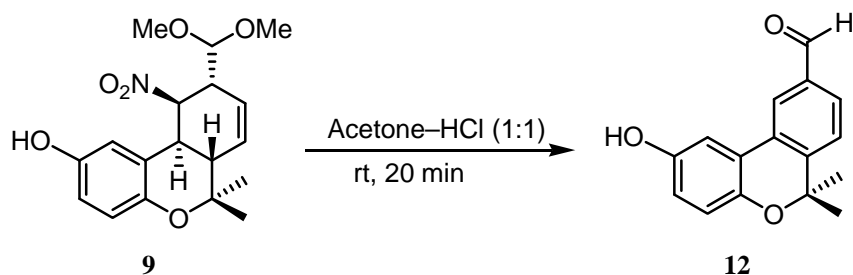

To a solution of Acetone–HCl (1:1, 4 mL), compound **9** (50 mg, 0.14 mmol) was added portion-wise at room temperature. The resulting solution was stirred for 20 min, diluted with EtOAc (20 mL), and the organic layer was washed with saturated aqueous solution of NaHCO<sub>3</sub> (10 mL), followed by brine (10 mL), and dried over anhydrous MgSO<sub>4</sub>, concentrated in *vacuo* to give crude product. The residue was purified by column chromatography with 15% EtOAc-hexane ( $R_f$  = 0.38 for **12** in 20 % EtOAc-hexane) to give **12** as a yellow oil (25 mg, 69% yield). Selected spectroscopic data for **12**: IR (neat): 3387, 2925, 1689, 1496, 1213, 770 cm<sup>-1</sup>; <sup>1</sup>H NMR (CDCl<sub>3</sub>, 500 MHz):  $\delta$  10.03 (s, 1 H), 8.15 (d,  $J$  = 0.7 Hz, 1 H), 7.79 (dd,  $J$  = 1.2, 7.8 Hz, 1 H), 7.40 (d,  $J$  = 7.8 Hz, 1 H), 7.31 (d,  $J$  = 2.7 Hz, 1H), 6.87-6.83 (m, 1 H) 6.82-6.78 (m, 1 H), 1.63 (s, 6 H); <sup>13</sup>C NMR (CDCl<sub>3</sub>, 125 MHz):  $\delta$  192.2 (CH), 150.7 (C), 146.4 (C), 146.1 (C), 135.7 (C), 129.8 (C), 129.7 (CH), 124.1 (CH), 123.2 (CH), 122.0 (C), 119.0 (CH), 117.5 (CH), 109.5 (CH), 77.3 (C), 27.1 (two CH<sub>3</sub>); MS ( $m/z$ , relative intensity): 254 ( $M^+$ , 45), 239 (100), 210 (9), 185 (45), 180 (28), 179 (100), 112 (5), 90 (5), 55 (4); exact mass calcd for C<sub>16</sub>H<sub>14</sub>O<sub>3</sub> ( $M^+$ ): 254.0943; found 254.0935.

## Preparation of 13

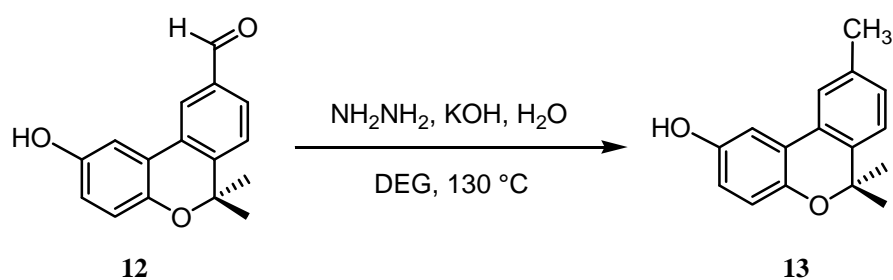

To a solution of **12** (15 mg, 0.06 mmol) and KOH (10 mg, 0.7 mmol) in diethylene glycol (1 mL) was added dropwise a solution of aqueous hydrazine hydrate (0.3 mL of hydrazine hydrate in 0.5 mL diethylene glycol). The solution was stirred for 20 min at room temperature and then 130 °C for 8 h. The reaction mixture was cooled to room temperature and diluted with EtOAc (15 mL). The organic layer was washed with H<sub>2</sub>O (5 mL), followed by brine (5 mL), dried over MgSO<sub>4</sub>, and concentrated in *vacuo* to give crude product. The residue was purified by flash column chromatography with 5 % EtOAc-Hexane ( $R_f$  = 0.51 for **12** in 20% EtOAc-Hexane) to give **12** as a

yellow oil. (9 mg, 63% yield). Selected spectroscopic data for **13**: IR (neat): 3395, 2976, 2927, 1614, 1569, 1321, 1210, 1040, 941, 869, 765  $\text{cm}^{-1}$ ;  $^1\text{H}$  NMR ( $\text{CDCl}_3$ , 500 MHz):  $\delta$  7.43 (br.s, 1 H), 7.18 (d,  $J = 3.0$  Hz, 1 H), 7.10 (br.s., 2 H), 6.80 (d,  $J = 8.5$  Hz, 1 H), 6.68 (dd,  $J = 8.5, 3.0$  Hz, 1 H), 2.37 (s, 3 H), 1.58 (s, 6 H);  $^{13}\text{C}$  NMR ( $\text{CDCl}_3$ , 125 MHz):  $\delta$  150.0 (C), 146.8 (C), 137.2 (C), 137.1 (C), 128.9 (CH), 128.2 (C), 123.4 (C), 123.1 (CH), 122.9 (CH), 118.7 (CH), 116.2 (CH), 109.3 (CH), 77.3 (C), 27.4 (two  $\text{CH}_3$ ), 21.3 ( $\text{CH}_3$ ); MS ( $m/z$ , relative intensity): 240 ( $\text{M}^+$ , 41), 226 (34), 225 (100), 120 (6), 112 (20), 76 (4); exact mass calcd for  $\text{C}_{16}\text{H}_{16}\text{O}_2$  ( $\text{M}^+$ ): 240.1150; found 240.1145.

**$^1\text{H}$  NMR Data for didehydroconicol**

| Lit. <sup>a,1</sup> |                   | Obs.     |                         |
|---------------------|-------------------|----------|-------------------------|
| $\delta$            | mult, $J$ (Hz)    | $\delta$ | mult, $J$ (Hz), H       |
| 7.43                | (bs), 1H          | 7.43     | (bs), 1H                |
| 7.18                | d (2.0), 1H       | 7.18     | d (3.0), 1H             |
| 7.11                | (AB), 1H          | 7.10     | (br. s., 2 H),          |
| 7.09                | (AB), 1H          |          |                         |
| 6.80                | d (8.0), 1H       | 6.80     | (d, $J = 8.5$ Hz, 1 H), |
| 6.68                | dd (8.0; 2.0), 1H | 6.68     | dd (8.5; 3.0, 1 H),     |
| 2.37                | s, 3H             | 2.37     | (s, 3 H),               |
| 1.58                | s, 3H             | 1.58     | (s, 3 H);               |
| 1.58                | s, 3H             | 1.58     | (s, 3 H);               |

<sup>a</sup> Spectrum recorded at 400 MHz (JEOL EX 400) in  $\text{CDCl}_3$ .

<sup>b</sup> Spectrum recorded at 500 MHz (Varian Unity INOVA 500) in  $\text{CDCl}_3$ .

**$^{13}\text{C}$  NMR Data for didehydroconicol**

| Lit. <sup>a,1</sup> | Obs. <sup>b</sup> |               |
|---------------------|-------------------|---------------|
| $\delta$            | $\delta$          | Type          |
| 150.2               | 150.0             | C             |
| 146.8               | 146.8             | C             |
| 137.3               | 137.2             | C             |
| 137.2               | 137.1             | C             |
| 129.0               | 128.9             | CH            |
| 128.3               | 128.2             | C             |
| 123.5               | 123.4             | C             |
| 123.2               | 123.1             | CH            |
| 123.0               | 122.9             | CH            |
| 118.8               | 118.7             | CH            |
| 116.2               | 116.2             | CH            |
| 109.4               | 109.3             | CH            |
| 77.4                | 77.3              | C             |
| 27.5                | 27.4              | $\text{CH}_3$ |
| 27.5                | 27.4              | $\text{CH}_3$ |
| 21.3                | 21.3              | $\text{CH}_3$ |

<sup>a</sup> Spectrum recorded at 100 MHz in  $\text{CDCl}_3$ . <sup>b</sup> Spectrum recorded at 125 MHz in  $\text{CDCl}_3$ .

<sup>1</sup> Simon-Levert, A.; Arrault, A.; Bontemps-Subielos, N. Canal, C.; Banaigs, B. *J. Nat. Prod.* **2005**, *68*, 1412-1415.

Preparation of **14**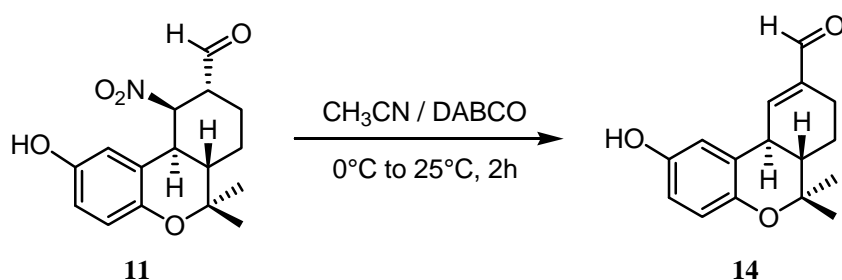

To a solution of **11** (45 mg, 0.15 mmole) in CH<sub>3</sub>CN (4 mL) was added DABCO (24 mg, 0.22 mmol) at 0 °C. The solution was stirred at 0 °C for 20 min and warmed up to room temperature over 2 h until the completion of reaction, monitored by <sup>1</sup>H NMR (*R<sub>f</sub>* = 0.28 for **14** in 30% EtOAc-hexane). The solution was diluted with EtOAc (15 mL), washed with brine (10 mL) dried over anhydrous MgSO<sub>4</sub> and concentrated *in vacuo* to give **14** as a yellow oil (30 mg, 79% yield). The product obtained was pure enough for NMR analysis and for the next step reaction without further purification. Moreover, due to the instability of **14** in solution (decomposition), for routine preparation, **14** was directly subjected to the next step reaction without further purification. For the purpose of spectra analysis, a pure sample was obtained by fast passing through a silica gel column with CHCl<sub>3</sub>. Selected spectroscopic data for **14**: [ $\alpha$ ]<sub>D</sub><sup>25</sup> +89.8 (c 0.9 CHCl<sub>3</sub>); IR (neat): 3394, 2930, 1671, 1550, 1370, 1154, 756 cm<sup>-1</sup>; <sup>1</sup>H NMR (CDCl<sub>3</sub>, 500 MHz):  $\delta$  9.52 (s, 1 H), 7.17 (br. s., 1 H), 6.86 (br. s., 1 H), 6.70-6.67 (m, 1 H), 6.66-6.63 (m, 1 H), 4.78 (s, 1H), 3.43 (d, *J* = 11.0 Hz, 1 H), 2.55 (dd, *J* = 5.1, 18.3 Hz, 1 H), 2.25-2.03 (m, 1 H), 2.01 (dd, *J* = 6.6, 12.2 Hz, 1 H), 1.70-1.65 (m, 1 H), 1.43 (s, 3 H), 1.36 (dd, *J* = 6.2, 12.3 Hz, 1 H), 1.16 (s, 3 H); <sup>13</sup>C NMR (CDCl<sub>3</sub>, 125 MHz):  $\delta$  194.0 (CH), 150.4 (CH), 148.9 (C), 147.3 (C), 141.4 (C), 122.4 (C), 118.4(CH), 115.3(CH), 111.6, (CH), 77.3 (C), 44.1 (CH), 36.1 (CH), 27.8 (CH<sub>3</sub>), 23.3 (CH<sub>2</sub>), 22.2 (CH<sub>2</sub>), 20.2 (CH<sub>3</sub>) ; MS (*m/z*, relative intensity): 258 (M<sup>+</sup>, 33), 245 (40), 244 (43), 241 (37), 239 (100), 229 (77), 201 (30), 77 (23); exact mass calcd for C<sub>16</sub>H<sub>18</sub>O<sub>3</sub> (M<sup>+</sup>): 258.1256; found 258.1254.

Preparation of **15**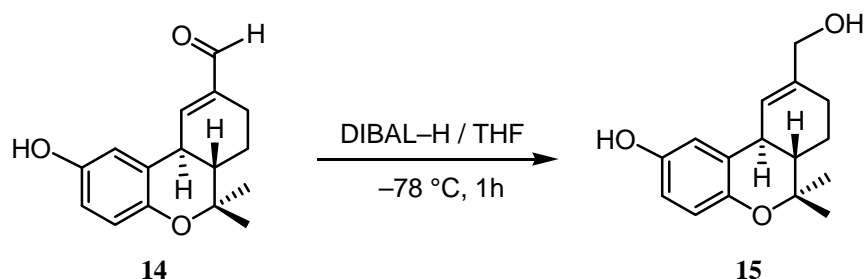

To a solution of **14** (30 mg, 0.11 mmol) in THF (5 mL) was added DIBAL-H (0.34 mL, 1M in toluene, 0.34 mmol) at  $-78\text{ }^{\circ}\text{C}$ , and the resulting solution was stirred for 1 h at the same temperature. The reaction was quenched by adding  $\text{H}_2\text{O}$  (4 mL), followed by EtOAc (15 mL), and allowed to warm up at room temperature. Then filter over celite, and organic layer was dried over anhydrous  $\text{MgSO}_4$ , and concentrated *in vacuo* to give the crude product. The residue was purified by flash column chromatography with 35% EtOAc-hexane ( $R_f = 0.25$  for **15** in 40% EtOAc-hexane) to give **15** as a yellow oil (22 mg, 73% yield). Selected spectroscopic data for **15**:  $[\alpha]_{\text{D}}^{25} +78.3$  (c 0.4  $\text{CHCl}_3$ ); IR (neat): 3429, 2927, 1641, 1489, 1375, 1257, 1021, 803  $\text{cm}^{-1}$ ;  $^1\text{H}$  NMR ( $\text{C}_6\text{D}_6$ , 500 MHz):  $\delta$  7.03 (br. s., 1 H), 6.92 (d,  $J = 8.5$  Hz, 1 H), 6.70 (dd,  $J = 2.0, 8.5$  Hz, 1 H), 6.17 (br. s., 1 H), 6.14 (s, 1 H), 3.92 (s, 2 H), 3.03 (d,  $J = 10.5$  Hz, 1H), 1.88-1.86 (m, 1 H), 1.84-1.79 (m, 1 H), 1.52-1.44 (m, 2 H), 1.30 (s, 3 H), 1.00 (s, 3 H), 0.96 (dd,  $J = 6.6, 12.0$  Hz, 1 H);  $^{13}\text{C}$  NMR ( $\text{C}_6\text{D}_6$ , 125 MHz):  $\delta$  150.0 (C), 147.6 (C), 138.1 (C), 125.4 (C), 122.8 (CH), 118.3 (CH), 115.0 (CH), 112.5 (CH), 77.1 (C), 66.7 ( $\text{CH}_2$ ), 45.0 (CH), 34.5 (CH), 28.0 ( $\text{CH}_3$ ), 26.5 ( $\text{CH}_2$ ), 24.3 ( $\text{CH}_2$ ), 20.6 ( $\text{CH}_3$ ); MS ( $m/z$ , relative intensity): 259 ( $\text{M}^+ - 1$ , 24), 245 (35), 244 (42), 241 (57), 229 (100), 201 (31), 187 (26), 149 (38), 137 (34); exact mass calcd for  $\text{C}_{16}\text{H}_{20}\text{O}_3$  ( $\text{M}^+$ ): 260.1412; found 260.1412.

Preparation of **16**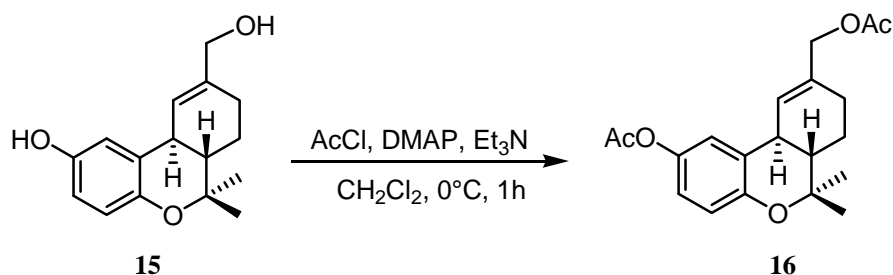

To a solution of **15** (25 mg, 0.096 mmol), in  $\text{CH}_2\text{Cl}_2$  (5 mL) was added DMAP (47 mg, 0.38 mmol), followed by triethyl amine (30 mg, 0.28 mmol) and acetyl chloride (15 mg, 0.19 mmol) at  $0\text{ }^{\circ}\text{C}$ , and allowed to warm at room temperature for 1 h. Then diluted with EtOAc (15 mL) and washed by  $\text{H}_2\text{O}$  (10 mL), followed by brine (10 mL), dried over  $\text{MgSO}_4$ , and concentrated *in vacuo* to give

the crude product. The residue was purified by flash column chromatography with 10% EtOAc-hexane ( $R_f = 0.35$  for **16** in 20% EtOAc-hexane) to give **16** as a colorless oil (25 mg, 76 % yield). Selected spectroscopic data for **16**:  $[\alpha]_D^{25} +72$  (c 0.5  $\text{CHCl}_3$ ); IR (neat): 2924, 1744, 1640, 1485, 1372, 1210, 1020, 929  $\text{cm}^{-1}$ ;  $^1\text{H}$  NMR ( $\text{CDCl}_3$ , 500 MHz):  $\delta$  6.97 (s, 1 H), 6.81-6.77 (m, 1 H), 6.76-6.74 (m, 1 H), 6.16 (br. s., 1 H), 4.55-4.44 (m, 2 H), 3.23 (d,  $J = 11.2$  Hz, 1 H), 2.26 (s, 3 H), 2.21 (d,  $J = 5.9$  Hz, 1 H), 2.18-2.11 (m, 1 H), 2.07 (s, 3 H), 1.92 (dd,  $J = 6.1, 12.5$  Hz, 1 H), 1.64-1.59 (m, 1 H), 1.46-1.35 (m, 1 H), 1.41 (s, 3 H), 1.15 (s, 3 H);  $^{13}\text{C}$  NMR ( $\text{CDCl}_3$ , 125 MHz):  $\delta$  170.9 (C), 170.1 (C), 151.0 (C), 143.4 (C), 134.0 (C), 126.4 (CH), 124.3 (C), 120.5 (CH), 118.7 (CH), 117.8 (CH), 77.9 (C), 68.2 ( $\text{CH}_2$ ), 43.8 (CH), 34.1 (CH), 27.9 ( $\text{CH}_3$ ), 26.7 ( $\text{CH}_2$ ), 24.0 ( $\text{CH}_2$ ), 21.1 ( $\text{CH}_3$ ), 21.0 ( $\text{CH}_3$ ), 20.8 ( $\text{CH}_3$ ); MS ( $m/z$ , relative intensity): 344 ( $\text{M}^+$ , 23), 343 (100), 334 (46), 327 (41), 316 (24), 177 (41), 149 (37), 77 (13), 57 (45); exact mass calcd for  $\text{C}_{20}\text{H}_{24}\text{O}_5$  ( $\text{M}^+$ ): 344.1624; found 344.1624

### Preparation of **17**

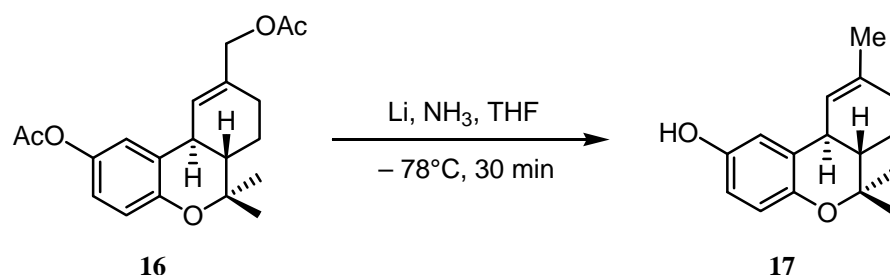

The acetate **16** (25 mg, 0.07 mmol) in THF (5 mL) was added to a solution of lithium (6 mg, 0.87 mmol) in liquid ammonia (5 mL) at  $-78^\circ\text{C}$  and stirred for 0.5 h. an aqueous saturated ammonium chloride solution (3 mL) was carefully added and the ammonia allowed to evaporate. The residue was diluted with EtOAc (20 mL), and washed by  $\text{H}_2\text{O}$  (10 mL) followed by brine (10 mL) and organic layer was dried over anhydrous  $\text{MgSO}_4$  and concentrated in *vacuo* to give crude product. The crude was purified by flash column chromatography with 10 % EtOAc-Hexane, ( $R_f = 0.38$  for **17** in 20 % EtOAc-hexane) to give **17** as colorless oil (13 mg, 73% yield). Selected spectroscopic data for **17**:  $[\alpha]_D^{25} +51.8$  (c 2  $\text{CHCl}_3$ );<sup>2,3</sup> IR (neat): 3390, 2930, 1617, 1490, 1375, 1213, 1130, 928, 759  $\text{cm}^{-1}$ ;  $^1\text{H}$  NMR ( $\text{CDCl}_3$ , 500 MHz):  $\delta$  6.78 (d,  $J = 1.7$  Hz, 1 H), 6.65 (d,  $J = 8.5$  Hz, 1 H), 6.60-6.54 (m, 1 H), 5.83 (br. s., 1 H), 4.47 (br. s., 1 H), 3.13 (d,  $J = 10.7$  Hz, 1 H), 2.08 (d,  $J = 5.9$  Hz, 2 H), 1.85 (dt,  $J = 2.4, 12.5$  Hz, 1 H), 1.71 (s, 3 H), 1.54 (dd,  $J = 12.0, 12.0$  Hz, 1 H),

<sup>2</sup> Garrido, L.; Zuba, E.; Ortega, M. J.; Salv, J. *J. Nat. Prod.*, **2002**, 65, 1328-1331. Lit.  $[\alpha]_D^{27} = +1.0$  (C 0.4,  $\text{CHCl}_3$ ). The optical rotation value is somewhat different from those reported for the natural product and raises earlier suspicions that the natural products have an enantiomeric excess in the opposite sense, and were not isolated as pure single enantiomers. Or, this lack of optical purity in the natural products may be due to their facile racemization and/or decomposition. In fact, storage of our enantiopure **17** in neat at  $25^\circ\text{C}$  for a week gave some decomposition products. Moreover, the compound was completely decomposed in  $\text{CHCl}_3$  and gave a complex mixture after standing in  $\text{CHCl}_3$  for 24 h at ambient temperature. Refer to the above reference on page 1330 and the note 6, 7 and 13 in that paper for the discussion of the low optical value.

<sup>3</sup> However, Alcohol **15** and acetate **16** were the stable compounds.

1.44-1.34 (m, 1 H), 1.39 (s, 3 H), 1.13 (s, 3 H);  $^{13}\text{C}$  NMR ( $\text{CDCl}_3$ , 125 MHz):  $\delta$  148.6 (C), 147.2 (C), 135.2 (C), 125.8 (C), 121.6 (CH), 111.7 (CH), 114.2 (CH), 112.0 (CH), 77.5 (C), 44.5 (CH), 34.2 (CH), 30.8 ( $\text{CH}_2$ ), 28.0 ( $\text{CH}_3$ ), 24.6 ( $\text{CH}_2$ ), 23.5 ( $\text{CH}_3$ ), 20.7 ( $\text{CH}_3$ ); MS ( $m/z$ , relative intensity): 244 ( $\text{M}^+$ , 34), 225 (29), 201 (23), 161 (28), 111 (38), 97 (56), 83 (63), 69 (71), 57 (100); exact mass calcd for  $\text{C}_{16}\text{H}_{20}\text{O}_2$  ( $\text{M}^+$ ): 244.1463; found 244.1459.

**$^1\text{H}$  NMR Data for (+)-Conicol**

| Lit. <sup>a,4</sup> |                            | Obs.      |                     |
|---------------------|----------------------------|-----------|---------------------|
| $\delta$            | mult, $J$ (Hz)             | $\delta$  | mult, $J$ (Hz), H   |
| 6.80                | br d (2.8)                 | 6.78      | d (1.7), 1 H        |
| 6.66                | d (8.7)                    | 6.65      | d (8.5), 1H         |
| 6.59                | br dd (8.7, 3.0)           | 6.60-6.54 | m, 1H               |
| 5.84                | br s                       | 5.83      | br s, 1H            |
| 4.45                | br s                       | 4.47      | br s, 1H            |
| 3.15                | br d (11.4)                | 3.13      | d (10.7), 1H        |
| 2.10                | m                          | 2.08      | d (5.9), 2H         |
| 1.87                | dddd (12.5, 5.2, 2.8, 2.3) | 1.85      | dt (12.5, 2.4), 1H  |
| 1.73                | d (0.9)                    | 1.71      | s, 3H               |
| 1.56                | ddd (12.3, 11.4, 2.2)      | 1.54      | dd (12.0, 12.0), 1H |
| 1.41                | s                          | 1.39      | s, 3 H              |
| 1.39                | m                          | 1.34-1.44 | m, 1H               |
| 1.15                | s                          | 1.13      | s, 3 H              |

<sup>a</sup> Spectrum recorded at 400 MHz (Varian Unity 400) in  $\text{CDCl}_3$ .

<sup>b</sup> Spectrum recorded at 500 MHz (Varian Unity INOVA 500) in  $\text{CDCl}_3$ .

**$^{13}\text{C}$  NMR Data for (+)-Conicol**

| Lit. <sup>a,4</sup> |      | Obs. <sup>b</sup> |               |
|---------------------|------|-------------------|---------------|
| $\delta$            | mult | $\delta$          | Type          |
| 148.6               | s    | 148.6             | C             |
| 147.3               | s    | 147.3             | C             |
| 135.2               | s    | 135.2             | C             |
| 125.9               | s    | 125.8             | C             |
| 121.7               | d    | 121.6             | CH            |
| 117.7               | d    | 117.7             | CH            |
| 114.2               | d    | 114.2             | CH            |
| 112.0               | d    | 112.0             | CH            |
| 77.5                | s    | 77.5              | C             |
| 44.6                | d    | 44.5              | CH            |
| 34.3                | d    | 34.2              | CH            |
| 30.8                | t    | 30.8              | $\text{CH}_2$ |
| 28.0                | q    | 28.0              | $\text{CH}_3$ |
| 24.6                | t    | 24.6              | $\text{CH}_2$ |
| 23.5                | q    | 23.5              | $\text{CH}_3$ |
| 20.7                | q    | 20.7              | $\text{CH}_3$ |

<sup>a</sup> Spectrum recorded at 100 MHz in  $\text{CDCl}_3$ . <sup>b</sup> Spectrum recorded at 125 MHz in  $\text{CDCl}_3$ .

<sup>4</sup> Garrido, L.; Zuba, E.; Ortega, M. J.; Salv, J. *J. Nat. Prod.*, **2002**, *65*, 1328-1331.

## Preparation of 20.

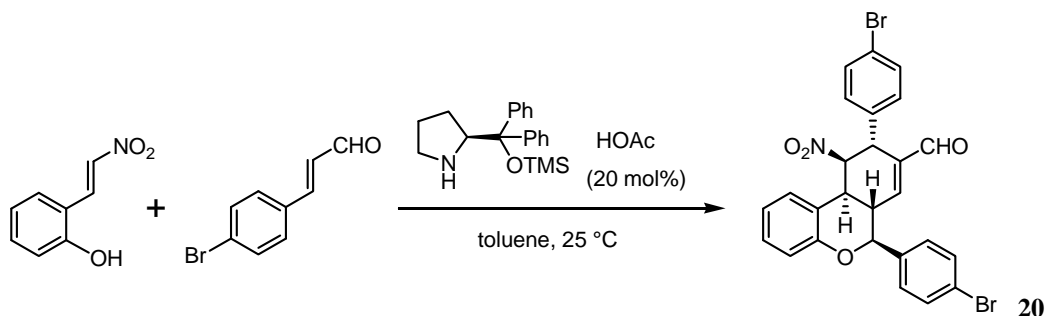

To a solution of (*E*)-3-(4-bromophenyl)acrylaldehyde (191.6 mg, 0.9 mmol), (*S*)-diphenyl-prolinol-O-TMS-ether (19.70 mg, 0.06 mmol) and acetic acid (3.63 mg, 0.06 mmol) in toluene (5mL) was added *trans*-2-Hydroxy- $\beta$ -nitrostyrene (50 mg, 0.3 mmol). The resulting solution was stirred for 10 h at 25 °C, and the reaction mixture was directly loaded on to a column and purified by silica gel chromatography with 4% EtOAc-Hexane ( $R_f$  = 0.75 for **20** in 20 % EtOAc-hexane) to give **20** as white solid (94 mg, 55% yields): mp 219-221 °C. Selected spectroscopic data for **20**:  $[\alpha]_D^{25}$  +29.3 (c 1.2 CHCl<sub>3</sub>); IR (neat): 2924, 1690, 1549, 1487, 1364, 1232, 1009, 754 cm<sup>-1</sup>; <sup>1</sup>H NMR (CDCl<sub>3</sub>, 500 MHz):  $\delta$  9.36 (s, 1 H), 7.66 (d,  $J$  = 8.5 Hz, 2 H), 7.50 (d,  $J$  = 8.5 Hz, 2 H), 7.42 (d,  $J$  = 8.5 Hz, 2 H), 7.18-7.15 (m, 1H), 7.12 (m, 1H), 7.09 (d,  $J$  = 8.5Hz, 2 H), 6.92 (m, 2 H), 6.58 (s, 1 H), 5.40 (d,  $J$  = 2.5Hz, 1 H), 5.05 (d,  $J$  = 10.5Hz, 1 H), 4.58 (s, 1 H), 3.50-3.48 (m, 1H), 3.47 (t,  $J$  = 10.5 Hz, 1H); <sup>13</sup>C NMR (CDCl<sub>3</sub>, 125 MHz):  $\delta$  191.1 (CH), 154.4 (C), 146.8 (CH), 139.9 (C), 137.4 (C), 136.4 (C), 132.5 (two CH), 132.4 (two CH), 129.4 (CH), 129.3 (two CH), 129.2 (two CH), 124.5 (CH), 123.6 (C), 122.4 (C), 121.1 (CH), 118.4 (C), 117.3 (CH), 84.8 (CH), 81.29 (CH), 42.4 (CH), 39.5 (CH), 35.8 (CH); MS ( $m/z$ , relative intensity): 569 ( $M^+$ +2, 13), 567 ( $M^+$ , 7), 522 (6), 443 (3), 369 (5), 295 (5), 221 (9), 171 (21), 169 (22), 43 (100); exact mass calcd for C<sub>26</sub>H<sub>19</sub>Br<sub>2</sub>NO<sub>4</sub> ( $M^+$ ): 566.9681; found 566.9680.

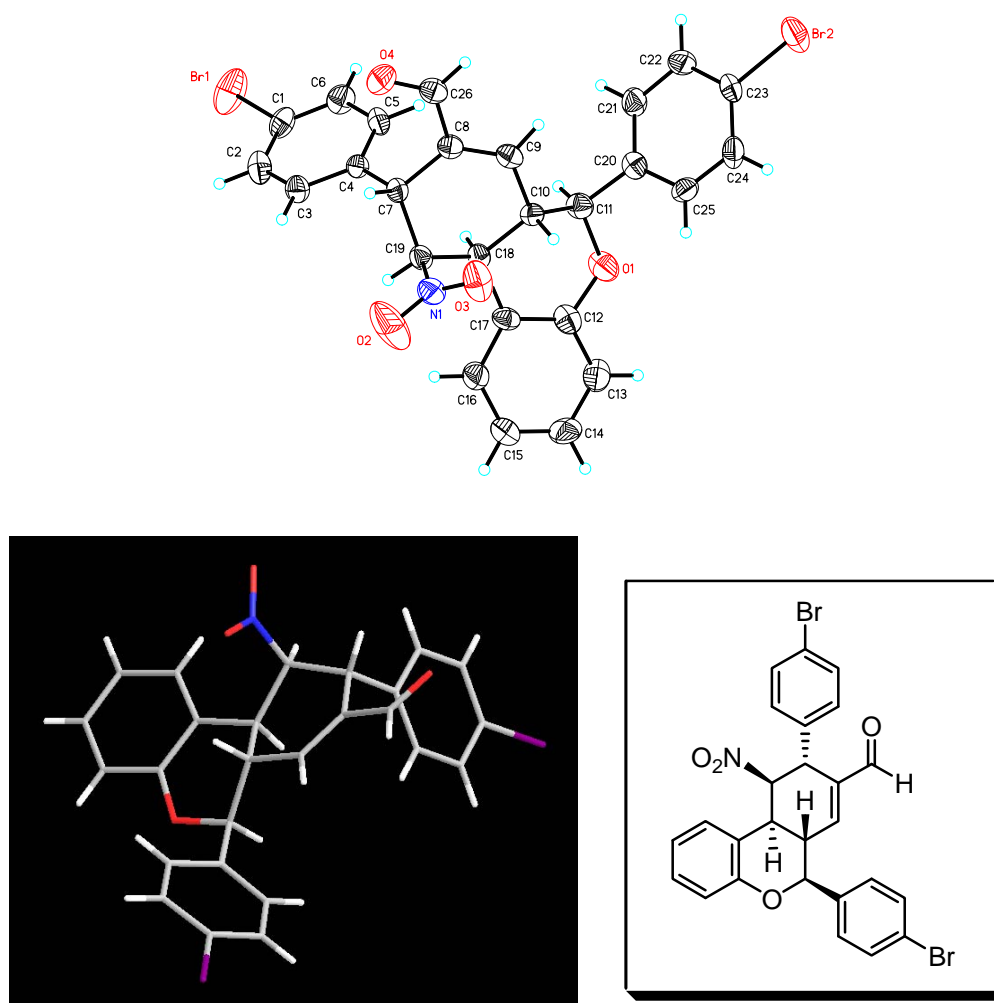

**Figure S1.** ORTEP and stereo plots for X-ray crystal structures of (+)-**20**.

CCDC 751181 contains the supplementary crystallographic data for (+)-**20**. These data can be obtained free of charge from the Cambridge Crystallographic Data Centre via [www.ccdc.cam.ac.uk/data\\_request/cif](http://www.ccdc.cam.ac.uk/data_request/cif). Crystallographic data for (+)-**20**:  $C_{26}H_{19}Br_2NO_4$ ,  $M = 569.24$ , orthorhombic, space group  $P 2_1 2_1 2_1$ ,  $T = 298(2)K$ ,  $a = 10.7996(6)$ ,  $b = 11.8516(7)$ ,  $c = 17.5643(10)$  Å,  $\beta = 90.00^\circ$ ,  $V = 2248.1(2)$  Å<sup>3</sup>,  $Z = 4$ ,  $D = 1.682$  g/cm<sup>3</sup>,  $\lambda$  (Mo- $K\alpha$ ) = 0.71073 Å, 26471 reflections collected, 5456 unique reflections, 298 parameters refined on  $F^2$ ,  $R = 0.0656$ ,  $wR2[F^2] = 0.1029$  [3703 data with  $F^2 > 2\sigma(F^2)$ ].

Preparation of **21**.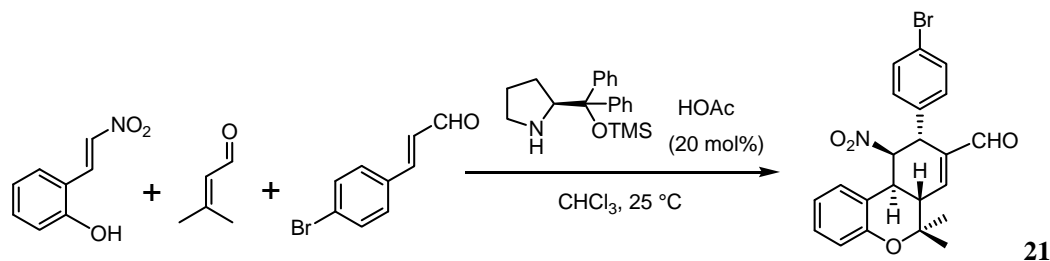

To a solution of 3-methylbut-2-enal (15.2 mg, 0.18 mmol), (*S*)-diphenylprolinol-O-TMS-ether (9.83 mg, 0.03 mmol), and acetic acid (1.81 mg, 0.03 mmol) in CHCl<sub>3</sub> (3 mL) was added *trans*-2-Hydroxy- $\beta$ -nitrostyrene (25 mg, 0.15 mmol). The resulting solution was stirred at 25 °C for 0.5 h, followed by the addition of (*E*)-3-(4-bromophenyl)acrylaldehyde (38.2 mg, 0.18 mmol), and stirred at room temperature for 24 h. The reaction mixture was diluted with EtOAc (15 mL), washed with brine (5 mL), dried over anhydrous MgSO<sub>4</sub>, and concentrated in *vacuo* to give crude product. The residue was purified by flash column chromatography with 12% EtOAc-hexane, (*R<sub>f</sub>* = 0.62 for **21** in 20% EtOAc-hexane) to give **21** as a white solid (35 mg, 52% yield): mp 187-190 °C. Selected spectroscopic data for **21**: [ $\alpha$ ]<sub>D</sub><sup>25</sup> -60 (c 0.75 CHCl<sub>3</sub>); IR (neat): 2968, 1690, 1547, 1510, 1366, 1255, 1019, 759 cm<sup>-1</sup>; <sup>1</sup>H NMR (CDCl<sub>3</sub>, 500 MHz):  $\delta$  9.58 (s, 1 H), 7.49 (d, *J* = 8.1 Hz, 2 H), 7.18-7.11 (m, 2 H), 7.09 (d, *J* = 8.1 Hz, 3 H), 6.87-6.79 (m, 2 H), 5.43 (br. s., 1 H), 4.59 (s, 1 H), 3.27 (d, *J* = 1.2 Hz, 1 H), 3.04 (d, *J* = 12.2 Hz, 1 H), 1.74 (s, 3 H), 1.28 (s, 3 H); <sup>13</sup>C NMR (CDCl<sub>3</sub>, 125 MHz):  $\delta$  191.6 (CH), 153.6 (C), 148.6 (CH), 140.2 (C), 137.9 (C), 132.8 (CH), 129.8 (two CH), 129.3 (two CH), 124.9 (CH), 122.6 (C), 120.6 (CH), 118.0 (CH), 117.6 (C), 85.6 (CH), 77.5 (C), 42.6 (CH), 42.5 (CH), 32.0 (CH), 28.2 (CH<sub>3</sub>), 22.6 (CH<sub>3</sub>); MS (*m/z*, relative intensity): 442 (*M*<sup>+</sup>+1, 100), 440 (*M*<sup>+</sup>-1, 87), 395 (49), 379 (43), 381 (82), 379 (94), 273 (32), 246 (33), 202 (56), 115 (65), 77 (40); exact mass calcd for C<sub>22</sub>H<sub>20</sub>BrNO<sub>4</sub> (*M*<sup>+</sup>): 441.0576; found 441.0574..

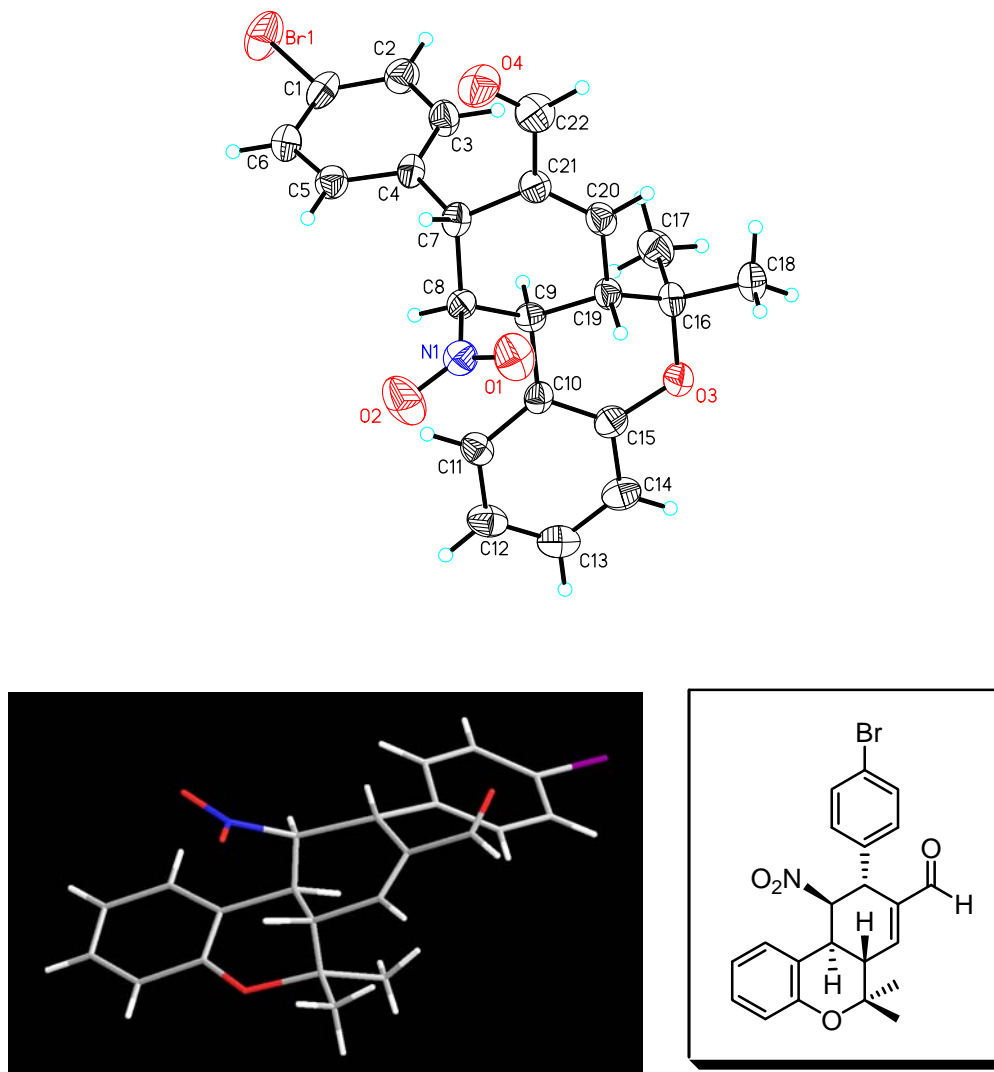

**Figure S2.** ORTEP and stereo plots for X-ray crystal structures of (-)-**21**.

CCDC 751182 contains the supplementary crystallographic data for (-)-**21**. These data can be obtained free of charge from the Cambridge Crystallographic Data Centre via [www.ccdc.cam.ac.uk/data\\_request/cif](http://www.ccdc.cam.ac.uk/data_request/cif). Crystallographic data for (-)-**21**:  $C_{22}H_{20}BrNO_4$ ,  $M = 442.30$ , Hexagonal, space group  $P\ 6_1$ ,  $T = 295(2)\text{K}$ ,  $a = 18.5358(18)$ ,  $b = 18.5358(18)$ ,  $c = 10.8967(15)\text{ \AA}$ ,  $\beta = 90.00^\circ$ ,  $V = 3242.3(6)\text{ \AA}^3$ ,  $Z = 6$ ,  $D = 1.359\text{ g/cm}^3$ ,  $\lambda\text{ (Mo-}K\alpha) = 0.71073\text{ \AA}$ , 23088 reflections collected, 3693 unique reflections, 275 parameters refined on  $F^2$ ,  $R = 0.0528$ ,  $wR2[F^2] = 0.1005$  [2291 data with  $F^2 > 2\sigma(F^2)$ ].

Fig S18. <sup>1</sup>H NMR of compound 4 (500 MHz, CDCl<sub>3</sub>).

S18

PMK-01-203

exp32 s2pul

```

SAMPLE
date Mar 28 2009 dfrq 125.695
solvent cdc13 dn C13
file /export/home/~ dpwr 30
vnmr1/vnmrsys/data~ dof 0
/PMK/PMK-01-203/H.~ dm nnn
fid dmm c
ACQUISITION dmf 200
sfrq 499.836 dseq
tn H1 dres 1.0
at 3.000 homo n
np 48000
sw 8000.0 wtfile
fb 4000 proc
bs 4 fn not used
tpwr 57 math f
pw 4.8
d1 1.000 werr react
tof 499.7 wexp procplot
nt 4 wbs
ct 4 wnt wft
alock y
gain not used
FLAGS
il n
in n
dp y
hs nn
DISPLAY
sp -250.1
wp 5498.0
vs 50
sc 0
wc 210
hzmm 26.18
ls 128.15
rfl 4631.6
rfp 3618.8
th 1
ins 100.000
nm ph
    
```

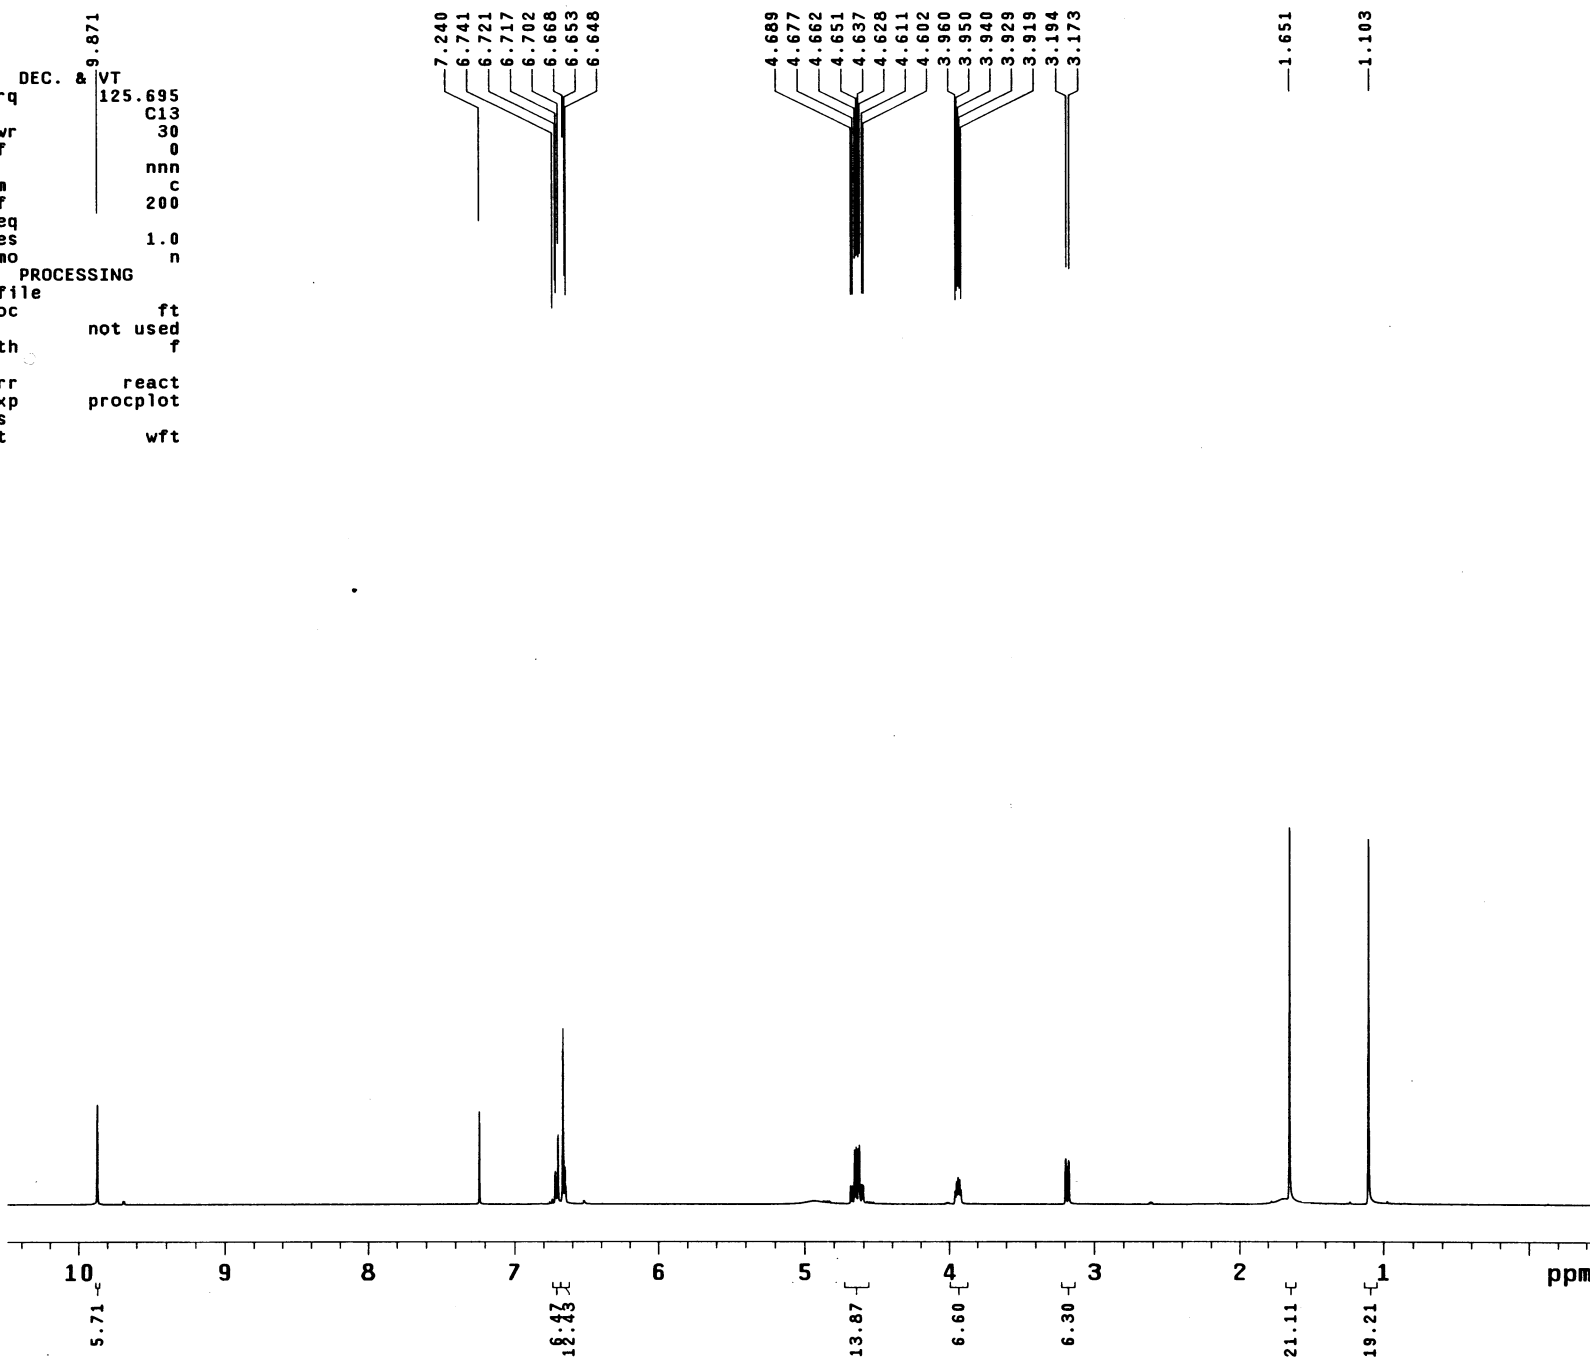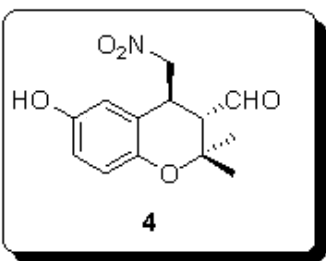

Fig S19. 13C NMR of compound 4 (125 MHz, CDCl<sub>3</sub>).

S19

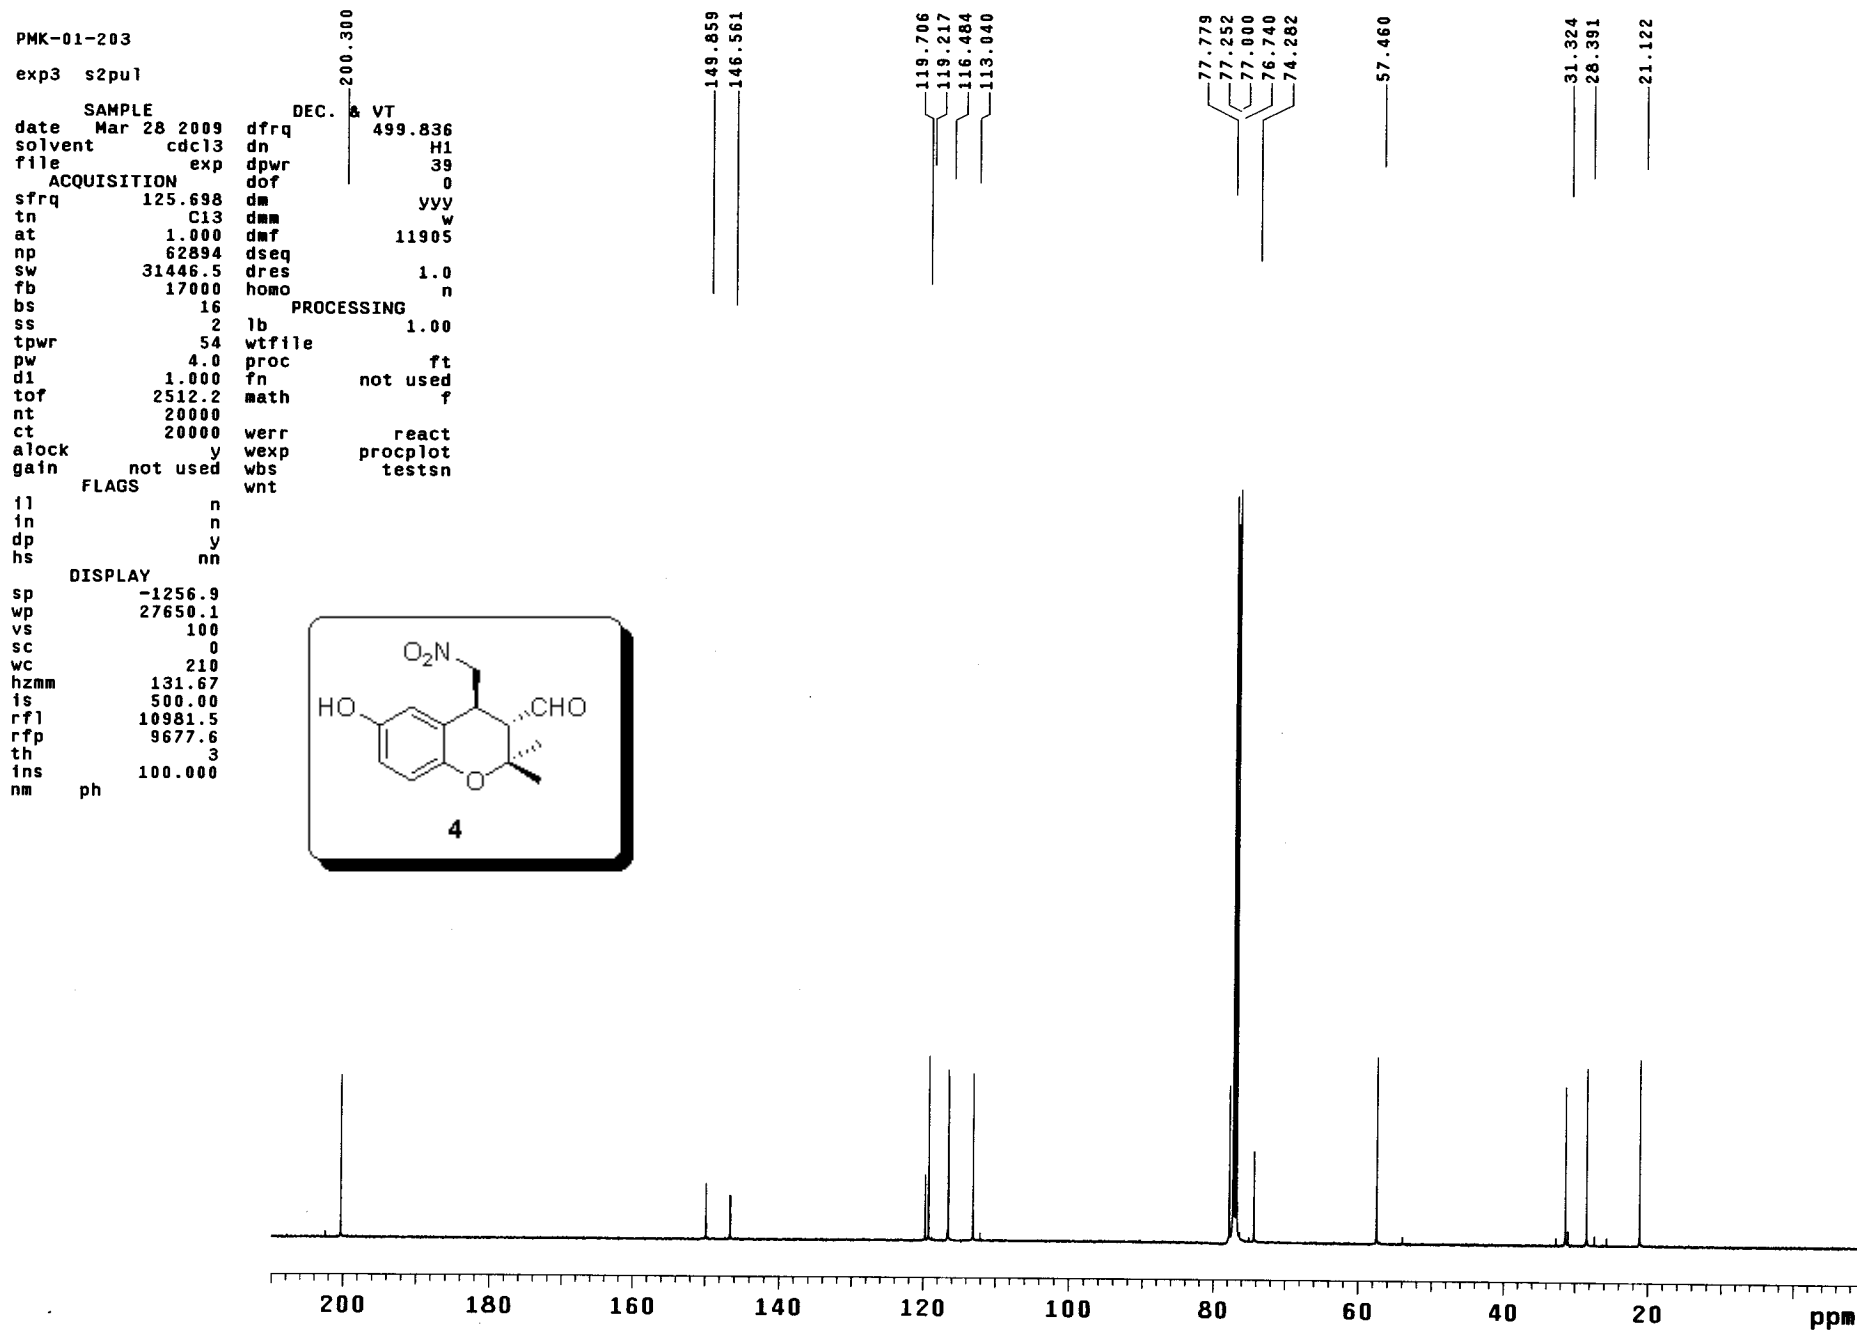

Fig S20. DEPT of compound 4 (CDCl<sub>3</sub>).

S20

PMK-01-203

exp2 DEPT

| SAMPLE      |             | DEPT       |          | ACQUISITION ARRAYS |      |
|-------------|-------------|------------|----------|--------------------|------|
| date        | Mar 28 2009 | j1xh       | 140.0    | array              | mult |
| solvent     | cdcl3       | mult       | arrayed  | arraydim           | 3    |
| sample      | undefined   | SPECIAL    |          |                    |      |
| ACQUISITION |             | temp       | not used | i                  | mult |
| sw          | 31446.5     | gain       | 40       | 1                  | 0.5  |
| at          | 1.000       | spin       | 0        | 2                  | 1    |
| np          | 62894       | PROCESSING |          | 3                  | 1.5  |
| bs          | 16          | lb         | 1.00     |                    |      |
| ss          | -4          | fn         | not used |                    |      |
| d1          | 1.000       | SPECTRUM   |          |                    |      |
| nt          | 900         | wp         | 27650.1  |                    |      |
| ct          | 900         | sp         | -1257.2  |                    |      |
| TRANSMITTER |             | rp         | 113.9    |                    |      |
| tn          | C13         | lp         | 82.5     |                    |      |
| tof         | 2512.2      | ai         | cdc ph   |                    |      |
| tpwr        | 54          | REFERENCE  |          |                    |      |
| pw          | 9.400       | rfl        | 1269.7   |                    |      |
| DECOUPLER   |             | rfp        | 0        |                    |      |
| dn          | H1          | PLOT       |          |                    |      |
| dof         | 0           | wc         | 210      |                    |      |
| dpwr        | 39          | sc         | 0        |                    |      |
| dm          | nny         | vs         | 225      |                    |      |
| dmm         | ccw         | hzmm       | 131.67   |                    |      |
| dmf         | 11905       | th         | 68       |                    |      |
| pplv1       | 49          |            |          |                    |      |
| pp          | 29.400      |            |          |                    |      |

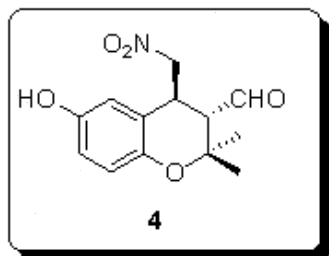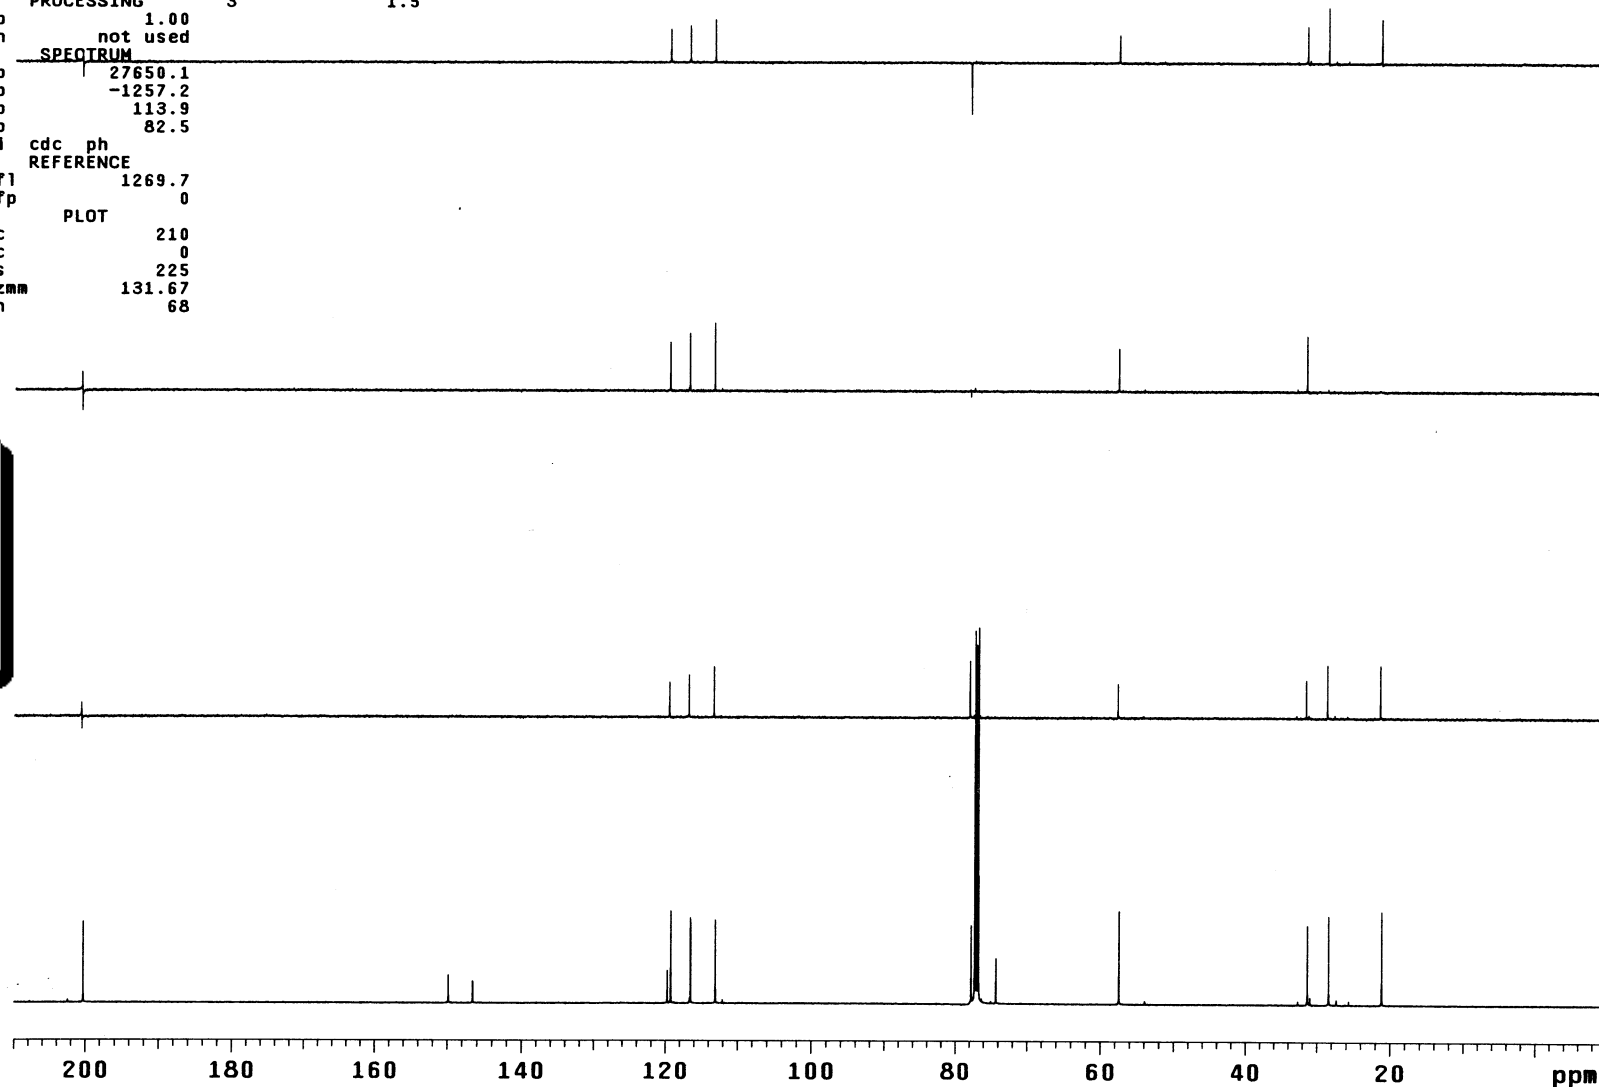

Fig S21. HMQC of compound 4 (CDCl<sub>3</sub>).

S21

PMK-01-203

exp32 gHMQC

| SAMPLE         |            | FLAGS         | ACQUISITION |          | ARRAYS |
|----------------|------------|---------------|-------------|----------|--------|
| date           | Apr 6 2009 | hs            | n           | array    | phase  |
| solvent        | cdc13      | sspul         | y           | arraydim | 256    |
| sample         | undefined  | PFGflg        | y           |          |        |
| ACQUISITION    |            | hsglvi        | 1026        | i        | phase  |
| sw             | 4698.4     | SPECIAL       |             | 1        | 1      |
| at             | 0.218      | temp          | not used    | 2        | 2      |
| np             | 2048       | gain          | 34          |          |        |
| fb             | 3000       | spin          | 0           |          |        |
| ss             | 32         | GRADIENTS     |             |          |        |
| d1             | 1.000      | gzlv11        | 1026        |          |        |
| nt             | 16         | gt1           | 0.001000    |          |        |
| 2D ACQUISITION |            | gzlv13        | 516         |          |        |
| sw1            | 21367.5    | gt3           | 0.001000    |          |        |
| ni             | 128        | gstab         | 0.000500    |          |        |
| phase          | arrayed    | F2 PROCESSING |             |          |        |
| TRANSMITTER    |            | gf            | 0.101       |          |        |
| tn             | H1         | gfs           | not used    |          |        |
| sfrq           | 499.836    | fn            | 2048        |          |        |
| tof            | 249.8      | F1 PROCESSING |             |          |        |
| tpwr           | 57         | gf1           | 0.006       |          |        |
| pw             | 13.000     | gfs1          | not used    |          |        |
| DECOUPLER      |            | proc1         | lp          |          |        |
| dn             | C13        | fni           | 2048        |          |        |
| dof            | -2515.1    | DISPLAY       |             |          |        |
| dm             | nny        | sp            | 411.4       |          |        |
| dmm            | ccp        | wp            | 3381.6      |          |        |
| dmf            | 32258      | sp1           | 1734.2      |          |        |
| dpwr           | 35         | wp1           | 14439.8     |          |        |
| pxwlv1         | 51         | rfl           | 1205.6      |          |        |
| pxw            | 14.700     | rfp           | 1589.5      |          |        |
| HMQC           |            | rfl1          | 8513.2      |          |        |
| j1xh           | 140.0      | rfp1          | 7221.8      |          |        |
| nullflg        | y          | PLOT          |             |          |        |
|                |            | wc            | 150.0       |          |        |
|                |            | sc            | 6.2         |          |        |
|                |            | wc2           | 116.2       |          |        |
|                |            | sc2           | 0           |          |        |
|                |            | vs            | 113         |          |        |
|                |            | th            | 5           |          |        |
|                |            | ai            | cdc         | ph       |        |

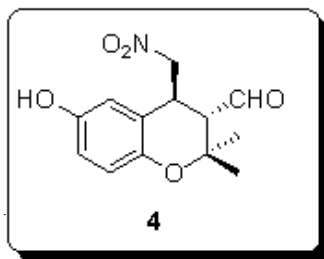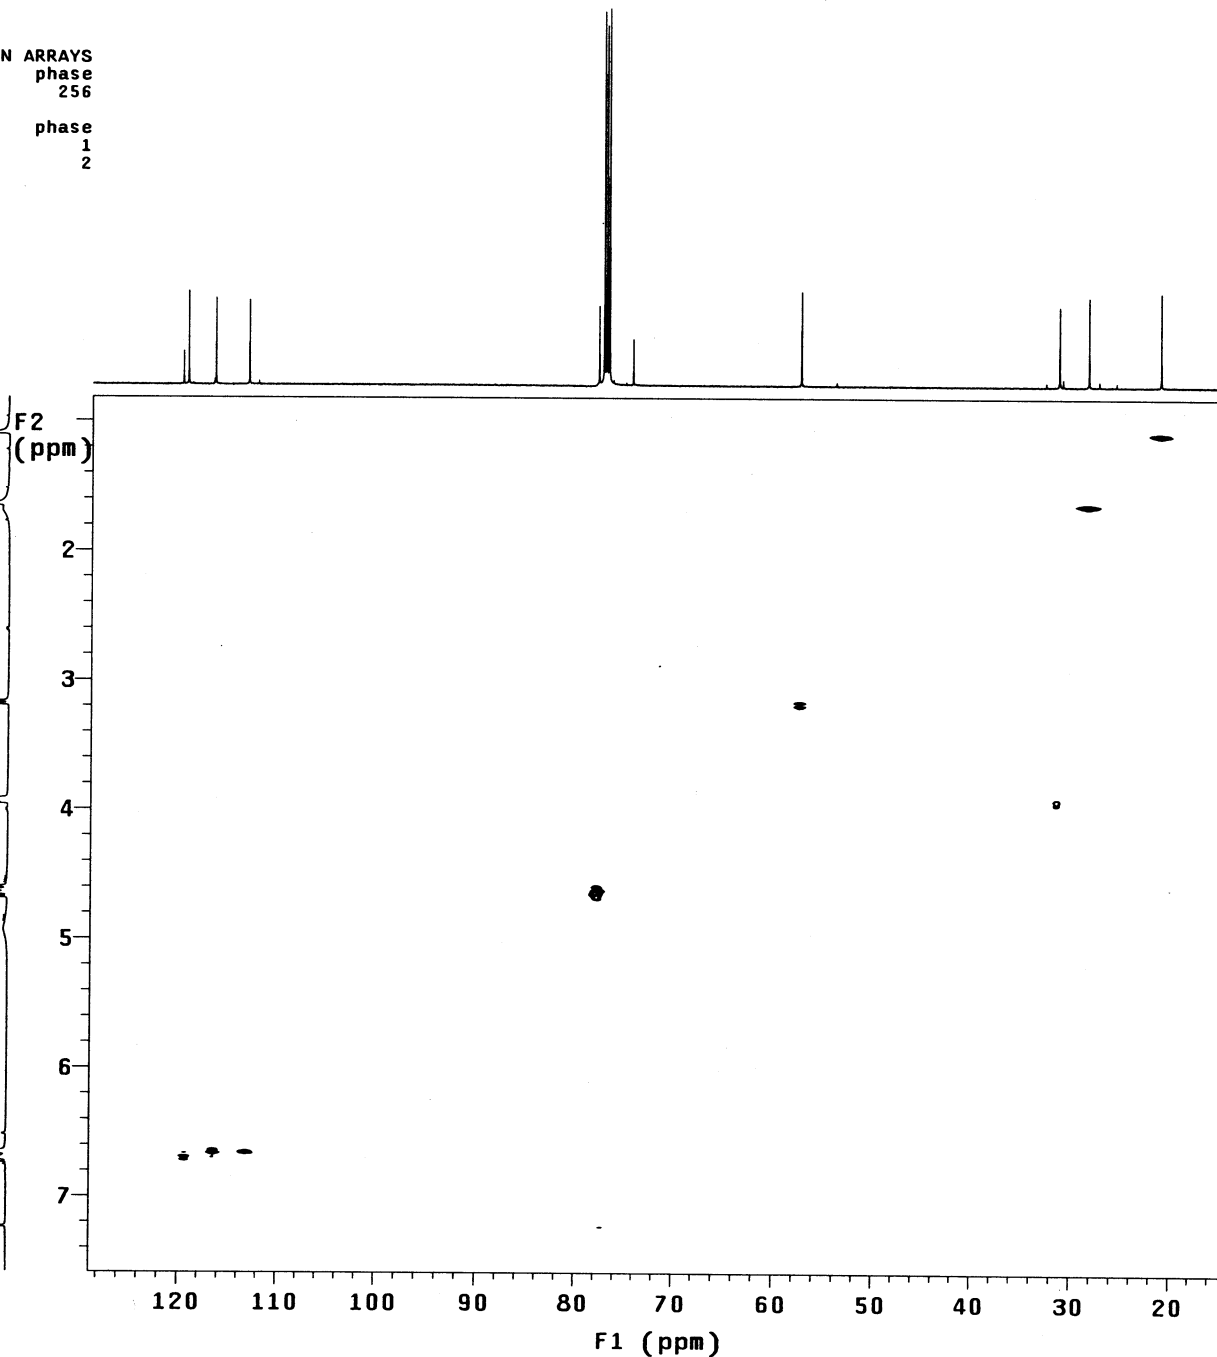

Fig S22. COSY of compound 4 (CDCl<sub>3</sub>).

S22

PMK-01-203

exp25 gCOSY

| SAMPLE         |             | FLAGS         |          |
|----------------|-------------|---------------|----------|
| date           | Apr 18 2009 | hs            | nn       |
| solvent        | cdcl3       | sspul         | n        |
| sample         | undefined   | hsglv1        | 1026     |
| ACQUISITION    |             | SPECIAL       |          |
| sw             | 4998.4      | temp          | 21.0     |
| at             | 0.205       | gain          | 40       |
| np             | 2048        | spin          | 0        |
| fb             | 3000        | F2 PROCESSING |          |
| ss             | 16          | sb            | -0.102   |
| dl             | 1.000       | sbs           | not used |
| nt             | 16          | fn            | 2048     |
| 2D ACQUISITION |             | F1 PROCESSING |          |
| sw1            | 4998.4      | sb1           | -0.026   |
| ni             | 128         | sbs1          | not used |
| TRANSMITTER    |             | proc1         |          |
| tn             | H1          | fn1           | 2048     |
| sfrq           | 499.836     | DISPLAY       |          |
| tof            | 249.8       | sp            | 241.6    |
| tpwr           | 57          | wp            | 4993.6   |
| pw             | 13.000      | sp1           | 243.0    |
| GRADIENTS      |             | wp1           |          |
| gzlv11         | 1026        | rfl           | 4993.6   |
| gt1            | 0.001000    | rfp           | 3382.0   |
| gstab          | 0.000500    | rfl1          | 3618.8   |
| DECOUPLER      |             | rfp1          |          |
| dn             | C13         | 3618.8        |          |
| dm             | nnn         | PLOT          |          |
|                |             | wc            | 155.0    |
|                |             | sc            | 10.0     |
|                |             | wc2           | 155.0    |
|                |             | sc2           | 0        |
|                |             | vs            | 1814     |
|                |             | th            | 5        |
|                |             | ai            | cdc av   |

F2  
(ppm)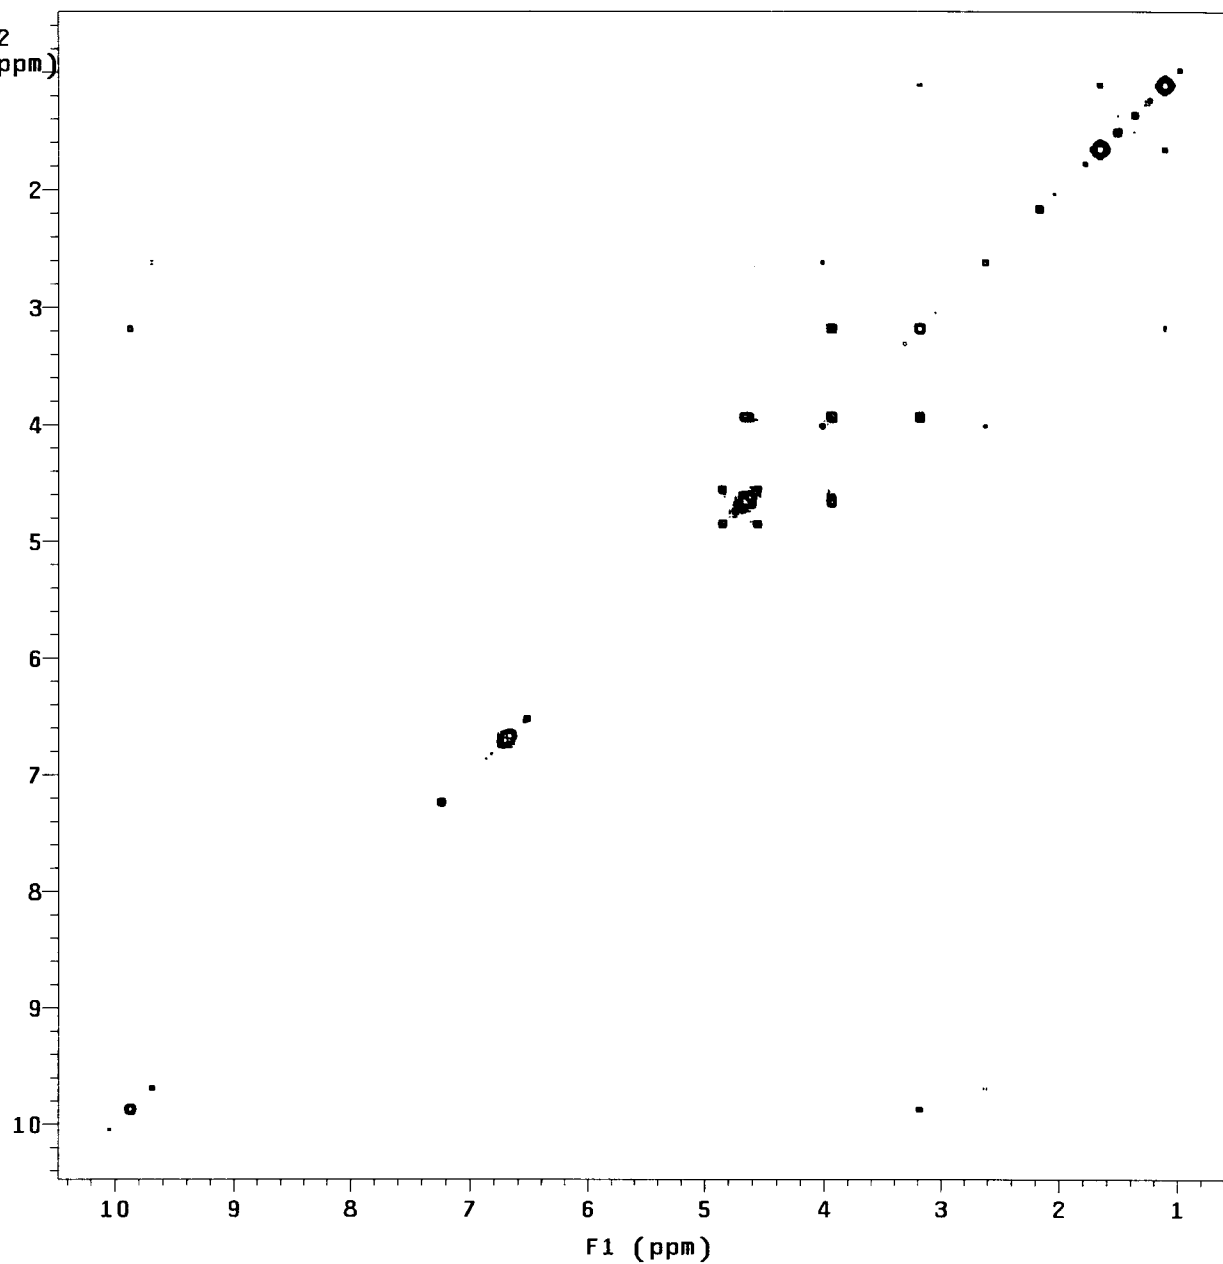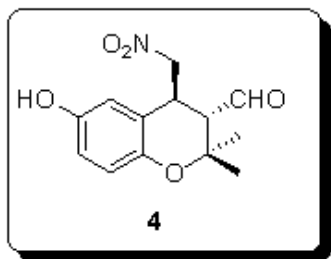

Fig S23. NOESY of compound 4 (CDCl<sub>3</sub>).

S23

PMK-01-203

exp27 NOESY

| SAMPLE         |             | FLAGS         |          |
|----------------|-------------|---------------|----------|
| date           | Apr 18 2009 | hs            | n        |
| solvent        | cdc13       | sspul         | y        |
| sample         | undefined   | PFGflg        | y        |
| ACQUISITION    |             | hsglv1        | 1026     |
| sw             | 4998.4      | SPECIAL       |          |
| at             | 0.205       | temp          | 21.0     |
| np             | 2048        | gain          | 40       |
| fb             | 3000        | spin          | 0        |
| ss             | 32          | F2 PROCESSING |          |
| d1             | 1.000       | gf            | 0.095    |
| nt             | 8           | gfs           | not used |
| 2D ACQUISITION |             | fn            | 2048     |
| sw1            | 4998.4      | F1 PROCESSING |          |
| ni             | 200         | gf1           | 0.037    |
| TRANSMITTER    |             | gfs1          | not used |
| tn             | H1          | proc1         | lp       |
| sfrq           | 499.836     | fn1           | 2048     |
| tof            | 249.8       | DISPLAY       |          |
| tpwr           | 57          | sp            | 243.5    |
| pw             | 13.000      | wp            | 4993.6   |
| NOESY          |             | sp1           | 244.4    |
| mix            | 0.600       | wp1           | 4993.6   |
| PRESATURATION  |             | rfl           | 3380.2   |
| satmode        | nnnn        | rfp           | 3618.8   |
| satpwr         | 0           | rfl1          | 3379.3   |
| satdly         | 0           | rfp1          | 3618.8   |
| satfrq         | 0           | PLOT          |          |
| DECOUPLER      |             | wc            | 155.0    |
| dn             | C13         | sc            | 10.0     |
| dm             | nnn         | wc2           | 155.0    |
|                |             | sc2           | 0        |
|                |             | vs            | 1814     |
|                |             | th            | 1        |
|                |             | ai            | ph       |

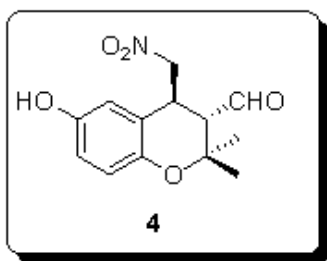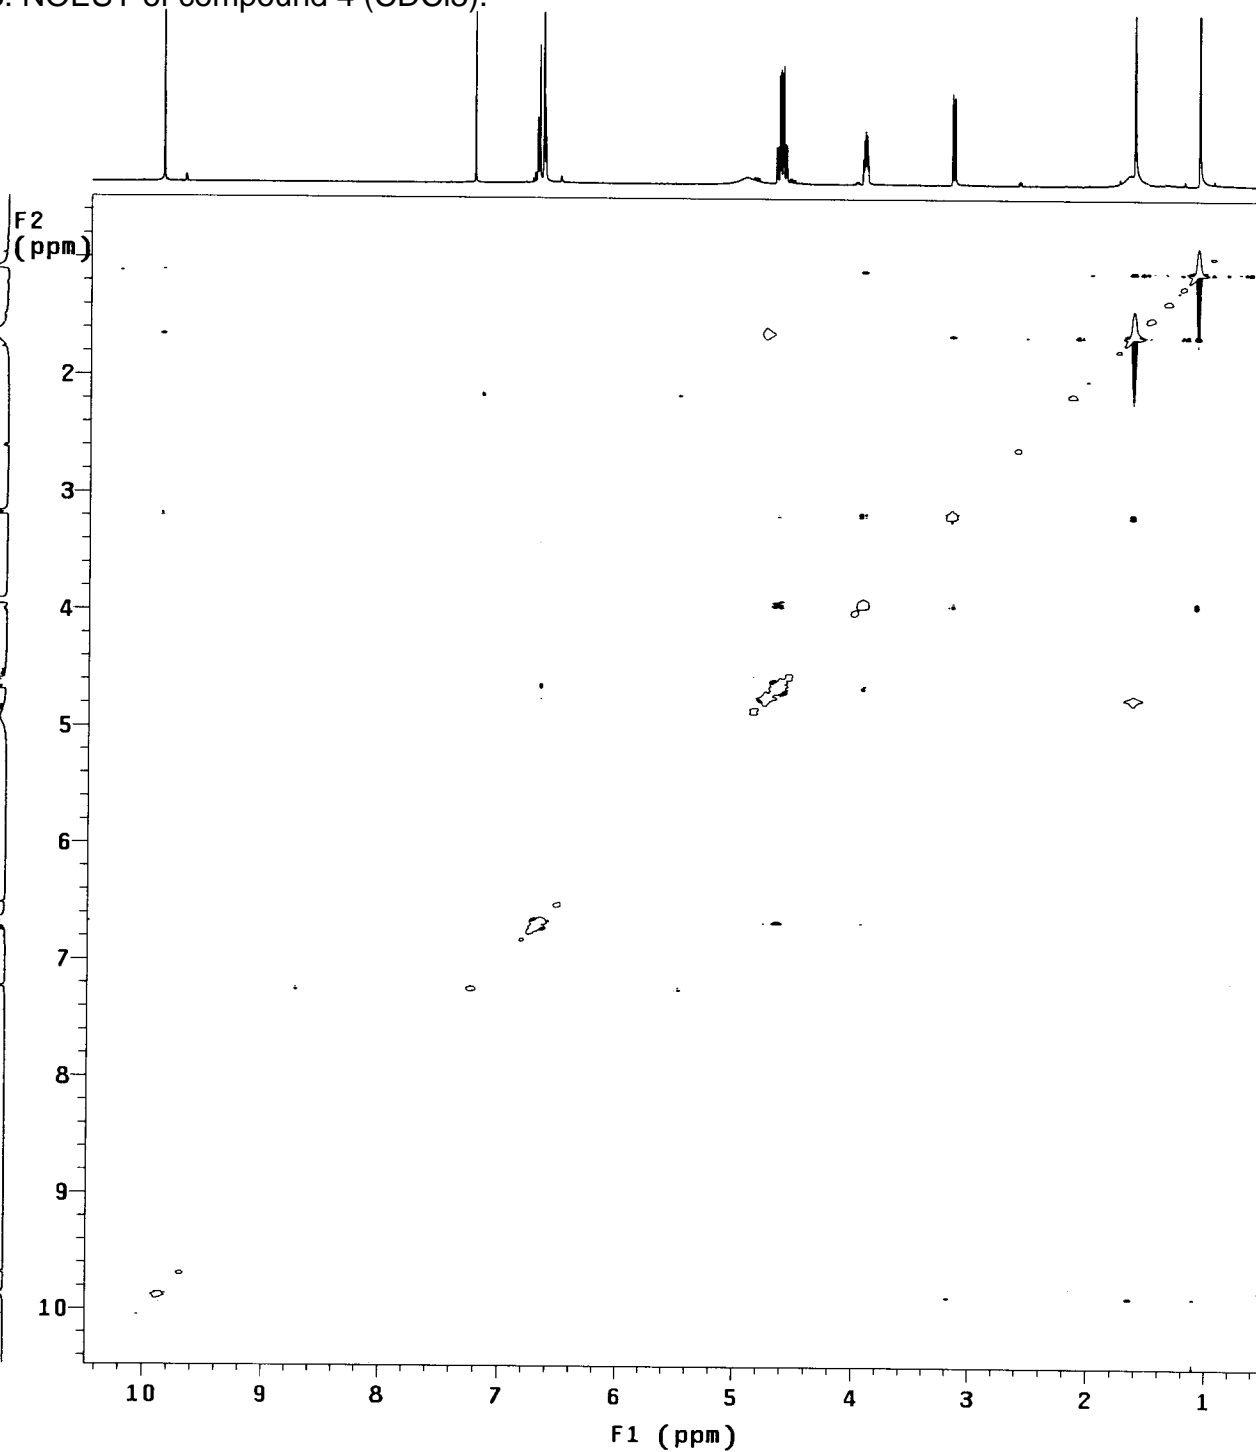

Fig S24. <sup>1</sup>H NMR of compound 5 (500 MHz, CDCl<sub>3</sub>).

S24

tcw-6-6  
exp22 s2pu1

| SAMPLE  |             | DEC. & VT |         |
|---------|-------------|-----------|---------|
| date    | Oct 17 2009 | dfrq      | 125.655 |
| solvent | cdc13       | dn        | 013     |
| file    | exp         | dpwr      | 30      |

ACQUISITION

|      |         |      |     |
|------|---------|------|-----|
| sfrq | 499.836 | dof  | 0   |
| tn   | H1      | dm   | rnn |
| at   | 3.000   | dmm  | c   |
| np   | 48000   | dmf  | 200 |
| sw   | 8000.0  | dseq | 1.0 |
| fb   | 4000    | dres | n   |
| bs   | 4       | homo |     |

PROCESSING

|       |          |        |          |
|-------|----------|--------|----------|
| tpwr  | 59       | wtfile | ft       |
| pw    | 4.8      | proc   | not used |
| d1    | 1.000    | fn     | f        |
| tof   | 499.7    | math   |          |
| nt    | 4        | werr   | react    |
| ct    | 4        | wexp   | procplot |
| alock | y        | wbs    |          |
| gain  | not used | wnt    | wft      |

FLAGS

|    |    |
|----|----|
| il | n  |
| in | n  |
| dp | y  |
| hs | nn |

DISPLAY

|      |         |
|------|---------|
| sp   | -250.1  |
| wp   | 5498.0  |
| vs   | 32      |
| sc   | 0       |
| wc   | 210     |
| hzmm | 26.18   |
| is   | 85.01   |
| rfl  | 4646.0  |
| rfp  | 3618.8  |
| th   | 2       |
| ins  | 100.000 |
| nm   | ph      |

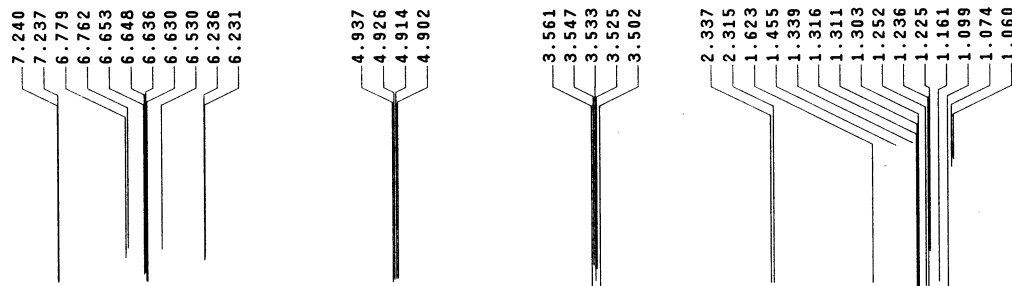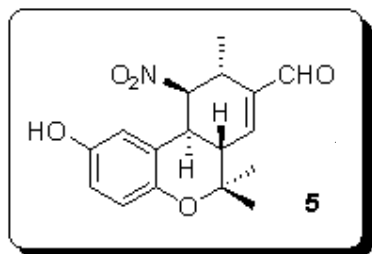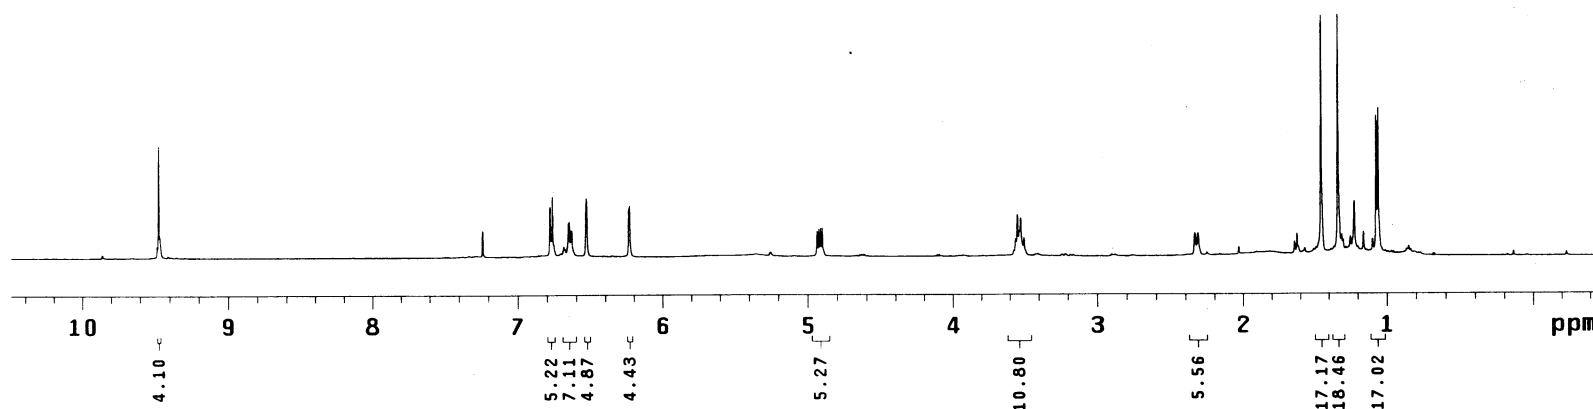

```

tcw-6-6
exp21 s2pu1

SAMPLE
date Sep 26 2009 dfrq 499 836
solvent cdc13 dn H1
file exp dpwr 39
ACQUISITION dof 0
sfrq 125.698 dm yyy
tn C13 dmm w
at 1.000 dmf 11905
np 62894 dseq
sw 31446.5 dres 1.0
fb 17000 homo n
bs 16
ss 2 lb 1.00
tpwr 54 wtfile
pw 4.0 proc ft
d1 1.000 fn not used
tof 2512.2 math f
nt 10000
ct 10000 werr react
alock y wexp procplot
gain not used wbs testsn
wnt

FLAGS
il n
in n
dp y
hs nn

DISPLAY
sp -1256.9
wp 27650.1
vs 50
sc 0
wc 210
hzmm 131.67
is 500.00
rfl 10981.5
rfp 9677.6
th 5
ins 100.000
nm cdc ph

```

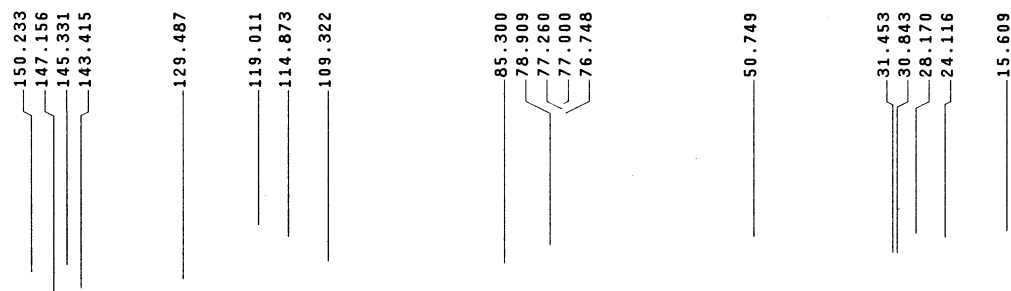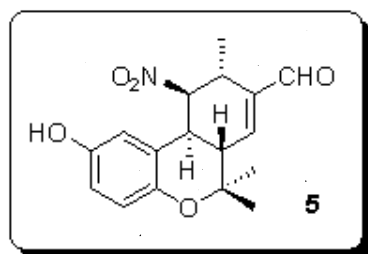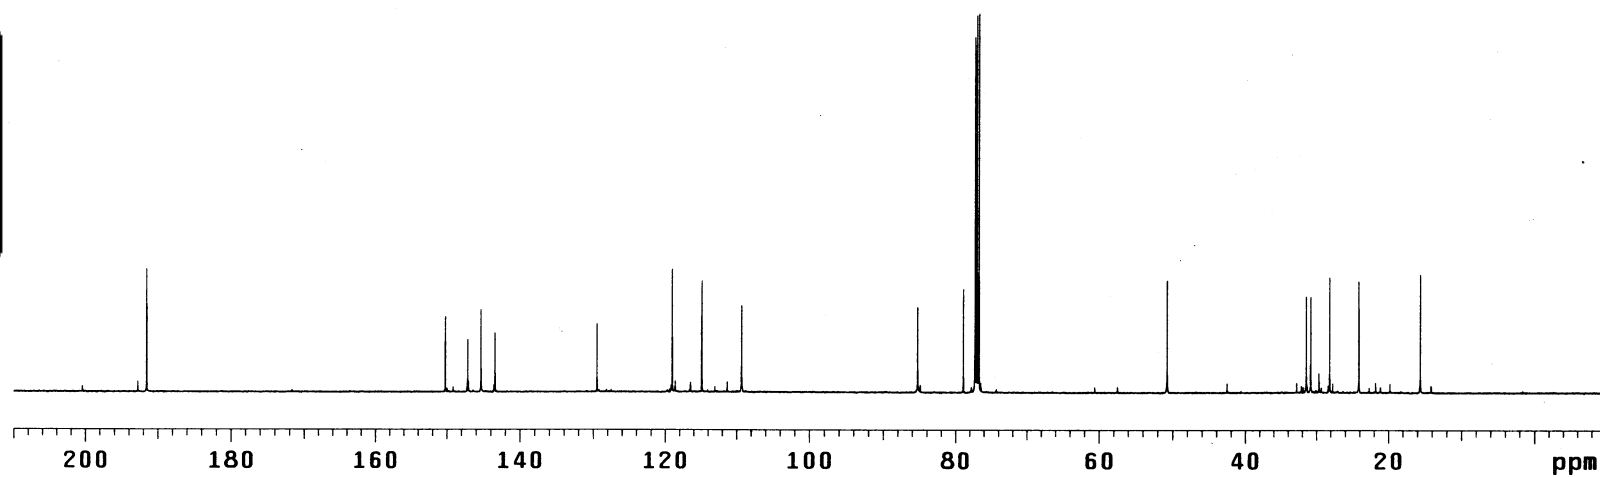

Fig S25. <sup>13</sup>C NMR of compound 5 (125 MHz, CDCl<sub>3</sub>).

Fig S26. DEPT of compound 5 (CDCl<sub>3</sub>).

tcw-6-6

exp23 DEPT

| SAMPLE      |             | DEPT          | ACQUISITION ARRAYS |      |
|-------------|-------------|---------------|--------------------|------|
| date        | Sep 26 2009 | j1xh 140.0    | array              | mult |
| solvent     | cdcl3       | mult arrayed  | arraydim           | 3    |
| sample      | undefined   | SPECIAL       |                    |      |
| ACQUISITION |             | temp not used | i                  | mult |
| sw          | 31446.5     | gain 34       | 1                  | 0.5  |
| at          | 1.000       | spin 0        | 2                  | 1    |
| np          | 62894       | PROCESSING    | 3                  | 1.5  |
| bs          | 16          | lb 1.00       |                    |      |
| ss          | -4          | fn not used   |                    |      |
| d1          | 1.000       | SPECTRUM      |                    |      |
| nt          | 1000        | wp 27650.1    |                    |      |
| ct          | 1000        | sp -1257.2    |                    |      |
| TRANSMITTER |             | rp -156.5     |                    |      |
| tn          | C13         | lp 78.7       |                    |      |
| tof         | 2512.2      | ai cdc ph     |                    |      |
| tpwr        | 54          | REFERENCE     |                    |      |
| pw          | 9.400       | rfl 1269.7    |                    |      |
| DECOUPLER   |             | rfl 0         |                    |      |
| dn          | H1          | PLOT          |                    |      |
| dof         | 0           | wc 210        |                    |      |
| dpwr        | 39          | sc 0          |                    |      |
| dm          | nny         | vs 118        |                    |      |
| dmm         | ccw         | hzmm 131.67   |                    |      |
| dmf         | 11905       | th 68         |                    |      |
| pp1v1       | 49          |               |                    |      |
| pp          | 29.400      |               |                    |      |

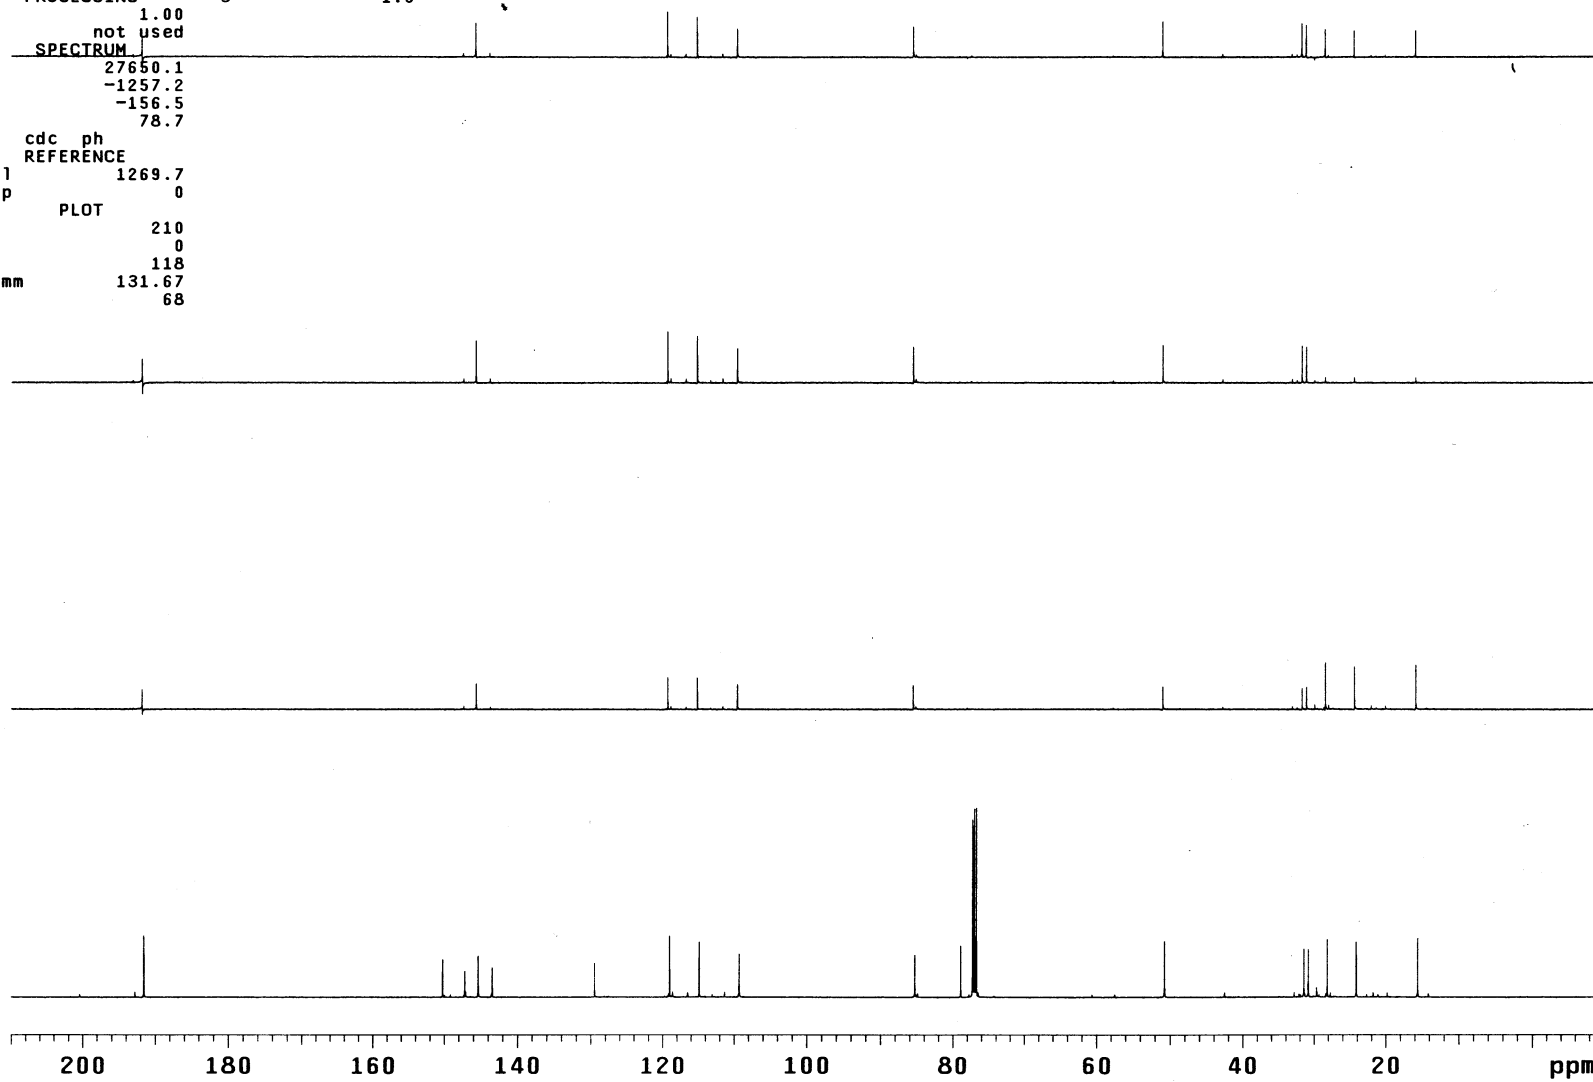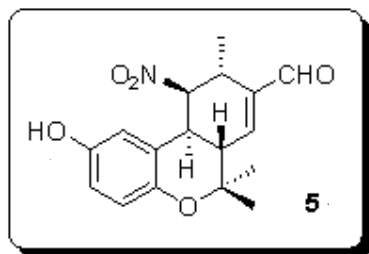

Fig S27. COSY of compound 5 (CDCl<sub>3</sub>).

tcw-6-6

exp25 gCOSY

SAMPLE  
date Sep 26 2009  
solvent cdc13  
sample undefined

ACQUISITION  
sw 4498.4  
at 0.228  
np 2048  
fb 3000  
ss 16  
dl 1.000  
nt 16

2D ACQUISITION  
sw1 4498.4  
n1 128

TRANSMITTER  
tn H1  
sfrq 499.836  
tof 249.8  
tpwr 57  
pw 13.000

GRADIENTS  
gzlv11 1026  
gt1 0.001000  
gstab 0.000500

DECOUPLER  
dn C13  
dm nnn

FLAGS  
hs nn  
sspul n  
hsglv1 1026

SPECIAL  
temp not used  
gain 34  
spin 0

F2 PROCESSING  
sb -0.114  
sbs not used  
fn 2048

F1 PROCESSING  
sb1 -0.028  
sbs1 not used  
proc1 lp  
fn1 2048

DISPLAY  
sp 491.3  
wp 4494.0  
sp1 492.3  
wp1 4494.0  
rf1 2629.0  
rfp 3116.0  
rf11 2628.0  
rfp1 3115.9

PLOT  
wc 155.0  
sc 10.0  
wc2 155.0  
sc2 0  
vs 113  
th 4  
a1 cdc av

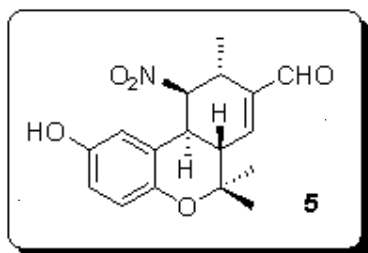F2  
(ppm)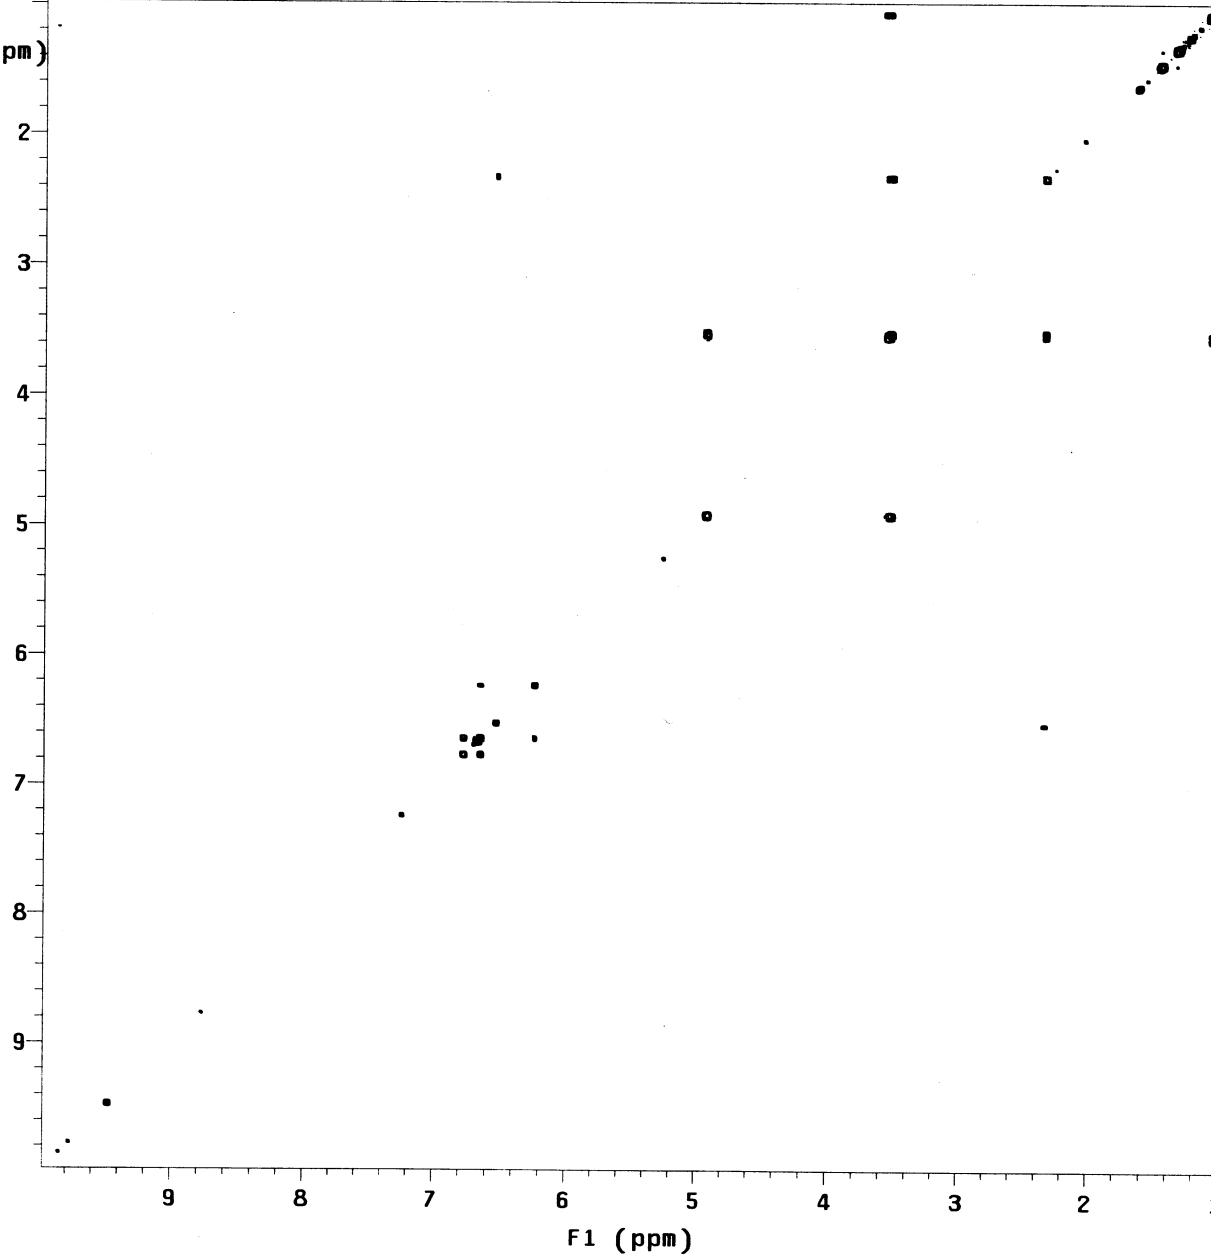

Fig S28. HMQC of compound 5 (CDCl<sub>3</sub>).

tcw-6-6

exp27 gHMQC

| SAMPLE         |             | FLAGS         |          | ACQUISITION ARRAYS |       |
|----------------|-------------|---------------|----------|--------------------|-------|
| date           | Sep 26 2009 | hs            | n        | array              | phase |
| solvent        | cdcl3       | sspul         | y        | arraydim           | 256   |
| sample         | undefined   | PFGflg        | y        |                    |       |
| ACQUISITION    |             | hsglv1        | 1026     | i                  | phase |
| sw             | 4498.4      | SPECIAL       | 1        | 1                  |       |
| at             | 0.228       | temp          | not used | 2                  | 2     |
| np             | 2048        | gain          | 20       |                    |       |
| fb             | 3000        | spin          | 0        |                    |       |
| ss             | 32          | GRADIENTS     |          |                    |       |
| d1             | 1.000       | gzlv11        | 1026     |                    |       |
| nt             | 16          | gt1           | 0.001000 |                    |       |
| 2D ACQUISITION |             | gzlv13        | 516      |                    |       |
| sw1            | 21367.5     | gt3           | 0.001000 |                    |       |
| ni             | 128         | gstab         | 0.000500 |                    |       |
| phase          | arrayed     | F2 PROCESSING |          |                    |       |
| TRANSMITTER    |             | gf            | 0.105    |                    |       |
| tn             | H1          | gfs           | not used |                    |       |
| sfrq           | 499.836     | fn            | 2048     |                    |       |
| tof            | 249.8       | F1 PROCESSING |          |                    |       |
| tpwr           | 57          | gf1           | 0.006    |                    |       |
| pw             | 13.000      | gfs1          | not used |                    |       |
| DECOUPLER      |             | proc1         | lp       |                    |       |
| dn             | C13         | fn1           | 2048     |                    |       |
| dof            | -2515.1     | DISPLAY       |          |                    |       |
| dm             | nny         | sp            | 512.0    |                    |       |
| dmm            | ccp         | wp            | 3154.2   |                    |       |
| dmf            | 32258       | sp1           | 1420.1   |                    |       |
| dpwr           | 35          | wp1           | 17319.4  |                    |       |
| pxlv1          | 51          | rfl           | 1969.2   |                    |       |
| pxw            | 14.700      | rfp           | 2459.2   |                    |       |
| HMQC           |             | rfl1          | 12013.4  |                    |       |
| j1xh           | 140.0       | rfp1          | 10720.8  |                    |       |
| nullflg        | y           | PLOT          |          |                    |       |
|                |             | wc            | 150.0    |                    |       |
|                |             | sc            | 6.2      |                    |       |
|                |             | wc2           | 116.2    |                    |       |
|                |             | sc2           | 0        |                    |       |
|                |             | vs            | 3506     |                    |       |
|                |             | th            | 3        |                    |       |
|                |             | ai            | cdc ph   |                    |       |

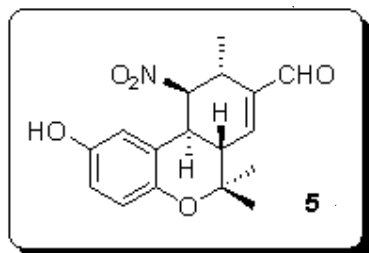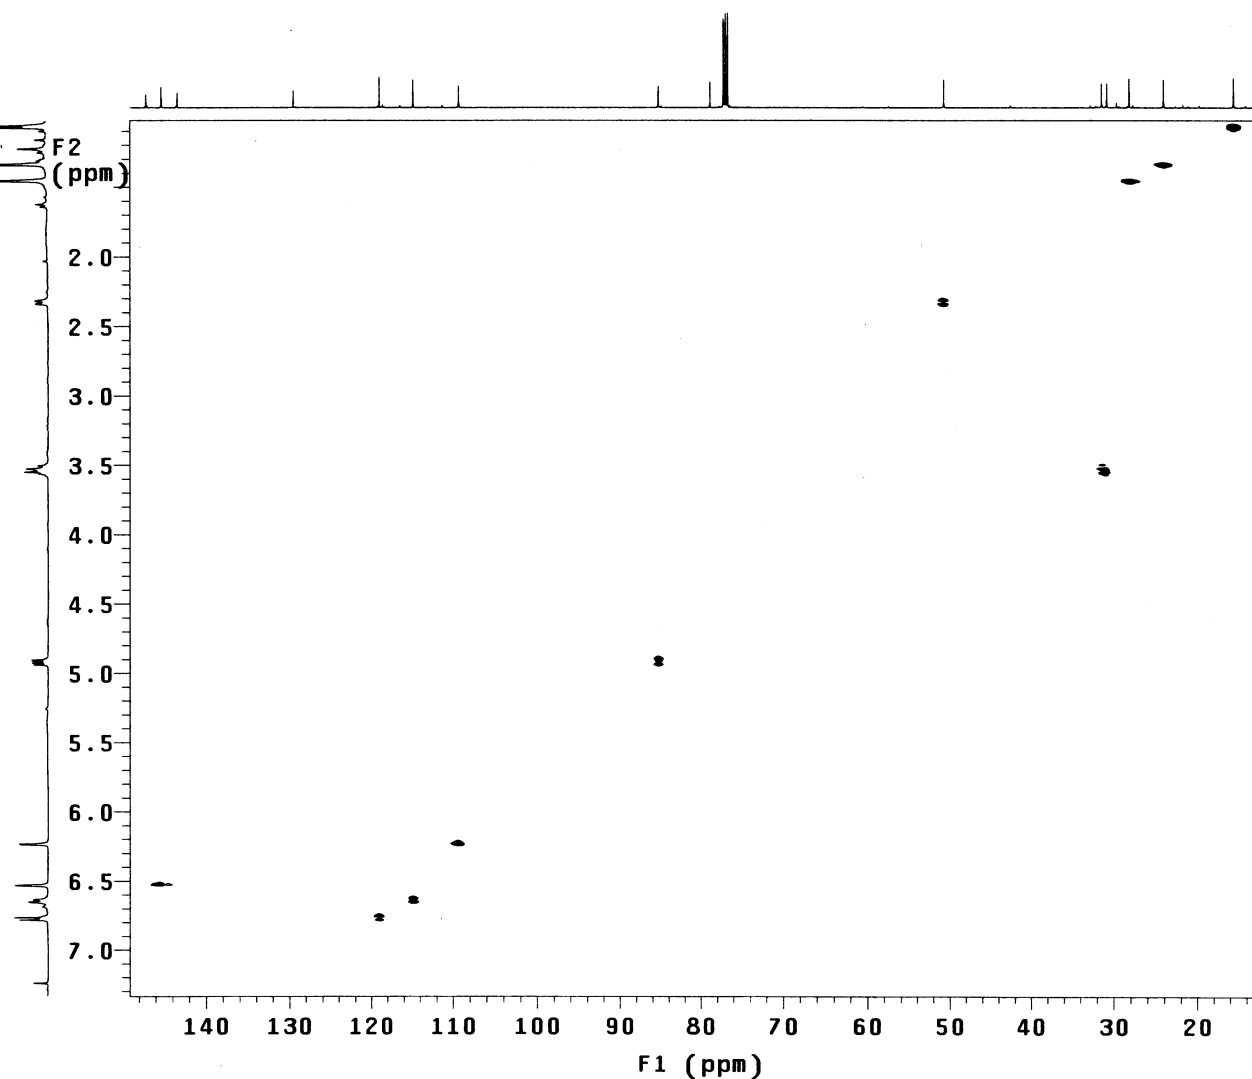

Fig S29. NOESY of compound 5 (CDCl<sub>3</sub>).

S29

tcw-6-6

exp26 NOESY

| SAMPLE         |             | FLAGS         |          | n |
|----------------|-------------|---------------|----------|---|
| date           | Sep 26 2009 | hs            |          | y |
| solvent        | cdcl3       | sspul         |          | y |
| sample         | undefined   | PFGflg        |          | y |
| ACQUISITION    |             | hsglvi        | 1026     |   |
| sw             | 4498.4      | SPECIAL       | not used |   |
| at             | 0.228       | temp          |          |   |
| np             | 2048        | gain          | 34       |   |
| fb             | 3000        | spin          | 0        |   |
| ss             | 32          | F2 PROCESSING |          |   |
| d1             | 1.000       | gf            | 0.105    |   |
| nt             | 8           | gfs           | not used |   |
| 2D ACQUISITION |             | fn            | 2048     |   |
| sw1            | 4498.4      | F1 PROCESSING |          |   |
| ni             | 200         | gf1           | 0.041    |   |
| TRANSMITTER    |             | gfs1          | not used |   |
| tn             | H1          | proc1         | lp       |   |
| sfrq           | 499.836     | fn1           | 2048     |   |
| tof            | 249.8       | DISPLAY       |          |   |
| tpwr           | 57          | sp            | 490.7    |   |
| pw             | 13.000      | wp            | 4494.0   |   |
| NOESY          |             | sp1           | 494.7    |   |
| mix            | 0.600       | wp1           | 4494.0   |   |
| PRESATURATION  |             | rfl           | 2629.7   |   |
| satmode        | nnnn        | rfp           | 3116.0   |   |
| satpwr         | 0           | rfl1          | 2625.7   |   |
| satdly         | 0           | rfp1          | 3115.9   |   |
| satfrq         | 0           | PLOT          |          |   |
| DECOUPLER      |             | wc            | 155.0    |   |
| dn             | C13         | sc            | 10.0     |   |
| dm             | nnn         | wc2           | 155.0    |   |
|                |             | sc2           | 0        |   |
|                |             | vs            | 113      |   |
|                |             | th            | 1        |   |
|                |             | ai            | ph       |   |

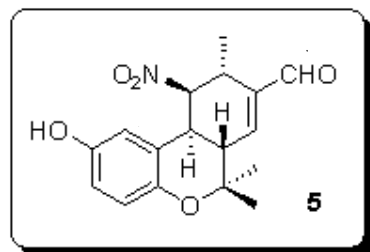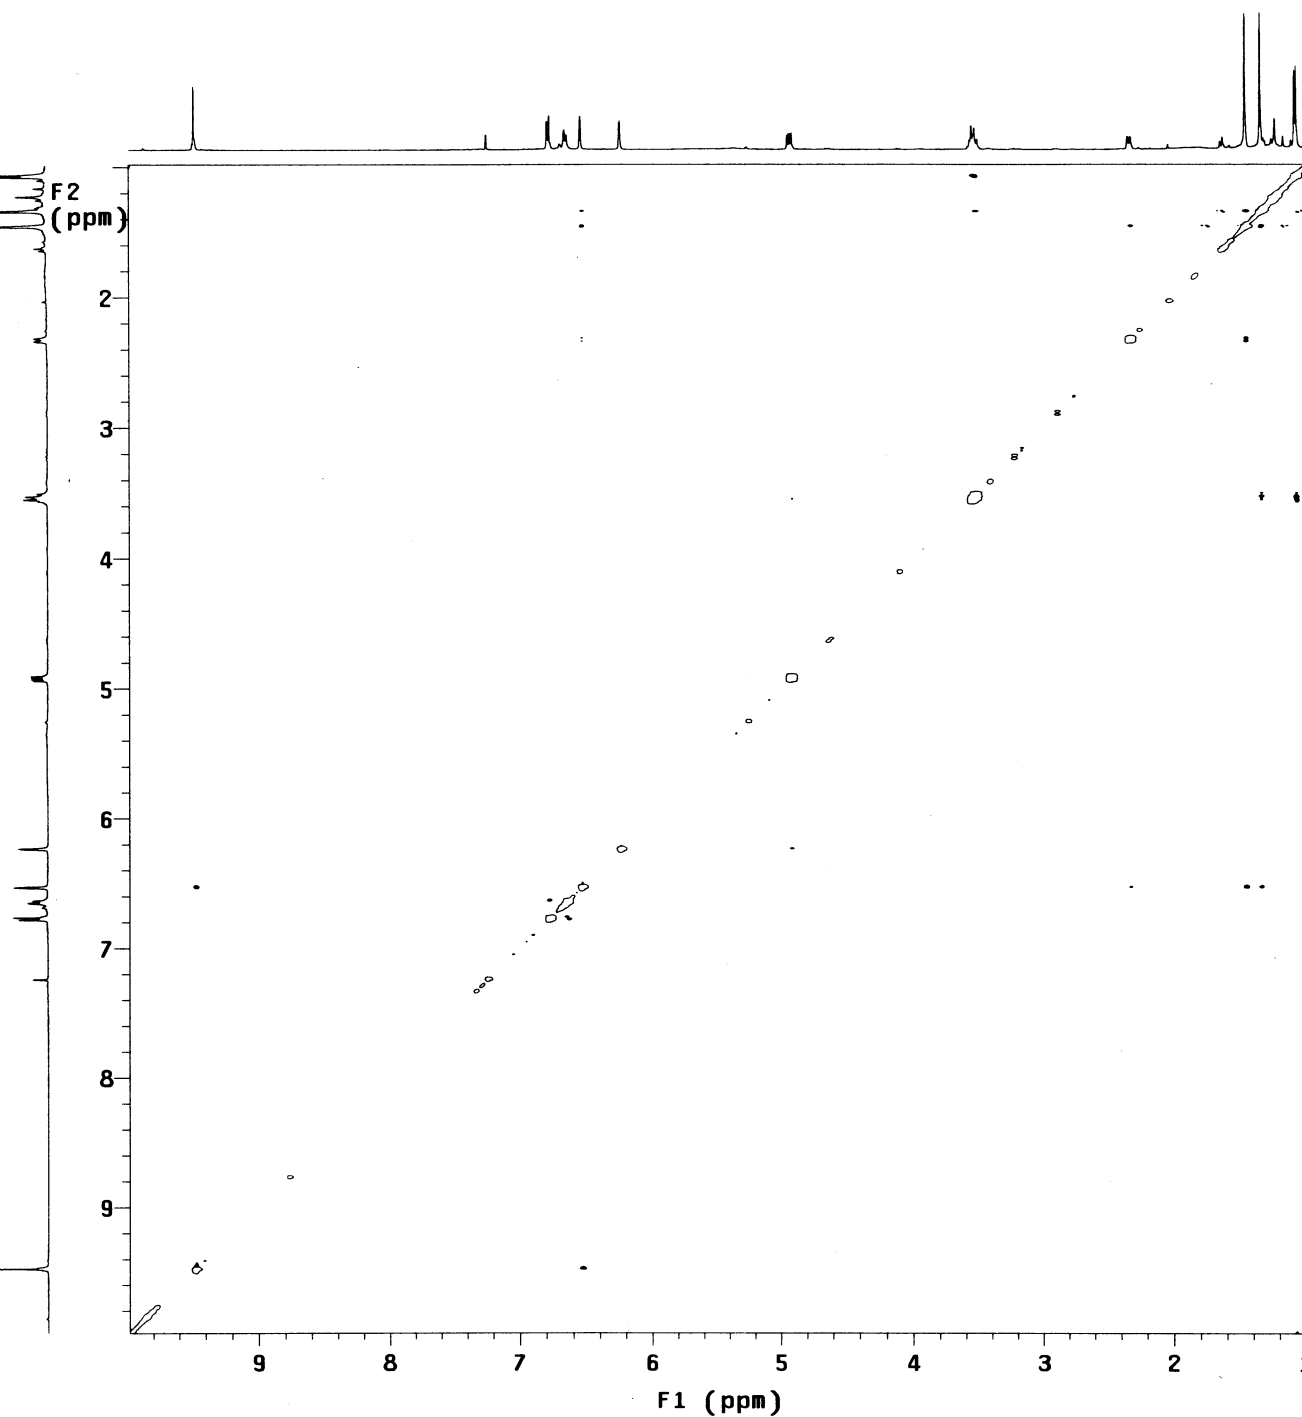

Fig S30. <sup>1</sup>H NMR of compound 7 (500 MHz, CDCl<sub>3</sub>).

tcw-5-61-F2

exp23 s2pu1

SAMPLE DEC. & VT  
date Nov 5 2009 dfrq 125.693  
solvent cdc13 dn C13  
file exp dpwr 30  
ACQUISITION dof 0  
sfrq 499.830 dm nnn  
tn H1 dmm c  
at 3.000 dmf 200  
np 48000 dseq  
sw 8000.0 dres 1.0  
fb 4000 homo n  
bs 4 temp 20.0  
tpwr 59  
pw 4.8 wtfile  
dl 1.000 proc ft  
tof 499.7 fn not used  
nt 1000 math f  
ct 20  
alock y werr react  
gain not used wexp procplot  
FLAGS  
il n wnt wft  
in n  
dp y  
hs nn  
DISPLAY  
sp -250.1  
wp 4998.0  
vs 35  
sc 0  
wc 210  
hzmm 23.80  
is 65.05  
rfl 4637.9  
rfp 3618.7  
th 4  
ins 100.000  
ai ph

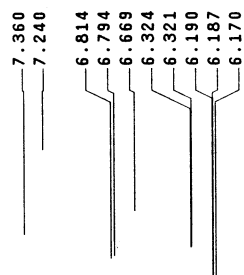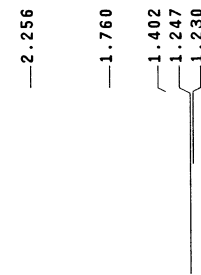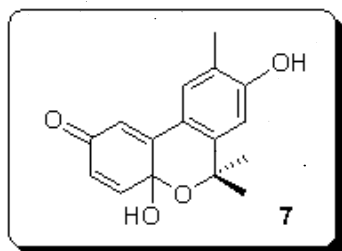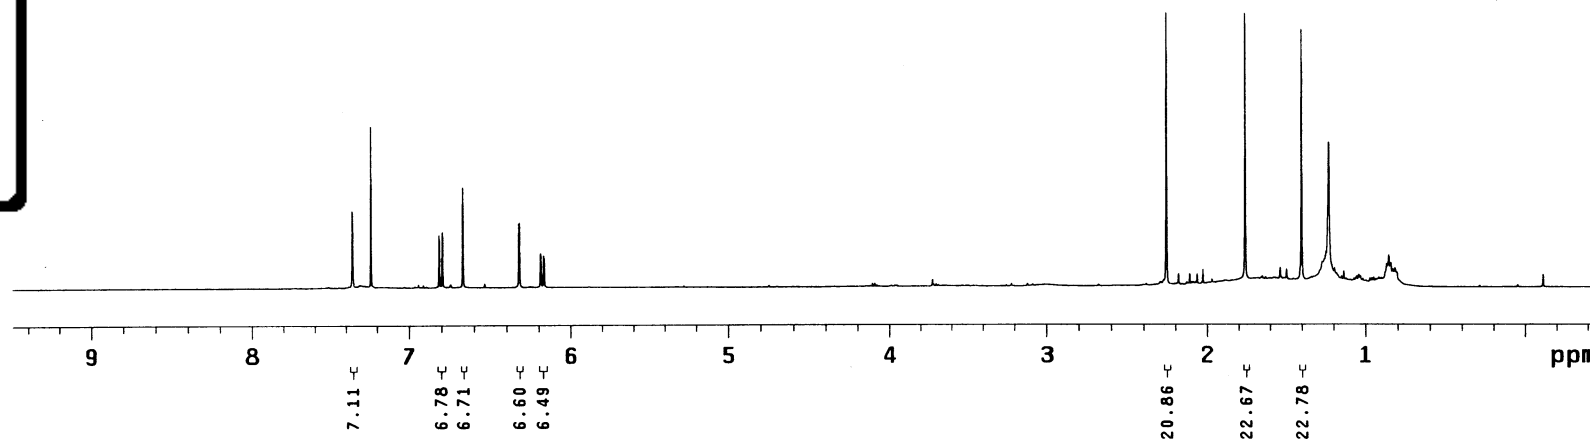

Fig S31. <sup>13</sup>C NMR of compound 7 (125 MHz, CDCl<sub>3</sub>).

S31

tcw-6-61-F2  
exp25 s2pul

SAMPLE  
date Nov 5 2009  
solvent cdc13  
file exp  
ACQUISITION  
sfrq 125.696  
tn C13  
at 1.000  
np 62894  
sw 31446.5  
fb 17000  
bs 16  
ss 2  
tpwr 54  
pw 4.0  
d1 1.000  
tof 2512.2  
nt 4000  
ct 4000  
alock y  
gain not used  
FLAGS  
il n  
in n  
dp y  
hs nn  
DISPLAY  
sp -1257.0  
wp 27649.1  
vs 200  
sc 0  
wc 210  
hzmm 131.67  
is 500.00  
rfl 10981.5  
rfp 9677.5  
th 4  
ins 100.000  
nm ph

DEC. & VT  
dfrq 499.829  
dn H1  
dpwr 39  
dof 0  
dm vvy  
dmm w  
dmf 11905  
dseq  
dres 1.0  
homo n  
temp 20.0  
PROCESSING  
lb 1.00  
wtfile  
proc ft  
fn not used  
math f  
werr react  
wexp procplot  
wbs testsn  
wnt

157.129  
149.242  
144.447  
143.240  
128.251  
127.281  
124.235  
119.180  
116.599  
111.277  
87.644  
77.252  
77.000  
76.748  
76.145  
33.812  
31.735  
15.570

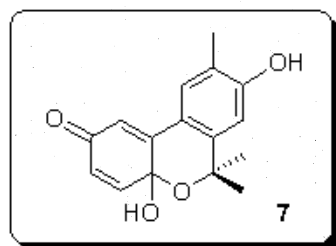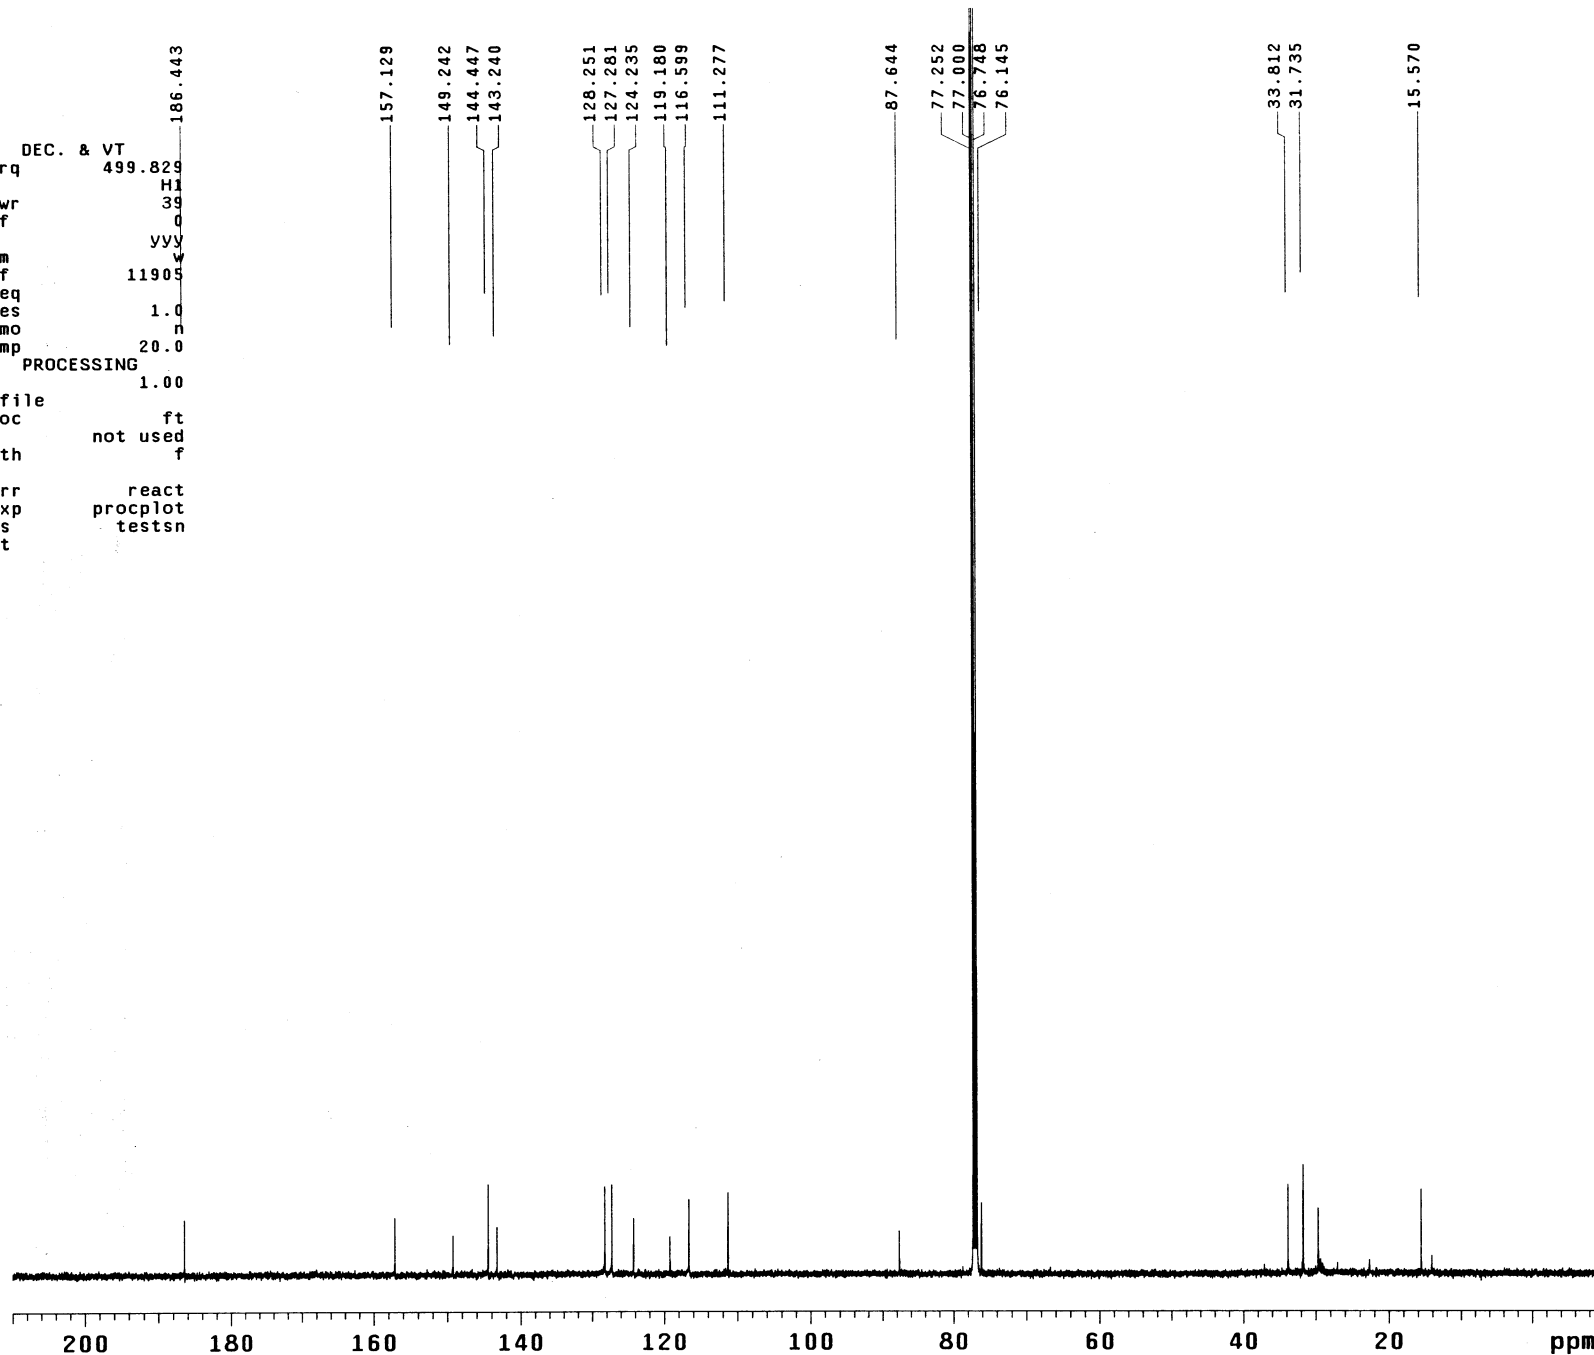

tcw-6-61-F2

exp24 DEPT

| SAMPLE      |            | DEPT        | ACQUISITION ARRAYS |      |
|-------------|------------|-------------|--------------------|------|
| date        | Nov 5 2009 | j1xh 140.0  | array              | mult |
| solvent     | cdcl3      | mult        | arrayed            | 3    |
| sample      | undefined  | SPECIAL     |                    |      |
| ACQUISITION |            | temp 20.0   | i                  | mult |
| sw          | 31446.5    | gain 20     | 1                  | 0.5  |
| at          | 1.000      | spin 0      | 2                  | 5    |
| np          | 62894      | PROCESSING  | 3                  | 1.5  |
| bs          | 16         | lb 1.00     |                    |      |
| ss          | -4         | fn not used |                    |      |
| d1          | 1.000      | SPECTRUM    |                    |      |
| nt          | 1200       | wp 27649.1  |                    |      |
| ct          | 1200       | sp -1257.4  |                    |      |
| TRANSMITTER |            | rp -61.1    |                    |      |
| tn          | C13        | lp 28.8     |                    |      |
| tof         | 2512.2     | ai cdc ph   |                    |      |
| tpwr        | 54         | REFERENCE   |                    |      |
| pw          | 10.500     | rfl 1269.9  |                    |      |
| DECOUPLER   |            | rfl 0       |                    |      |
| dn          | H1         | PLOT        |                    |      |
| dof         | 0          | wc 210      |                    |      |
| dpwr        | 39         | sc 0        |                    |      |
| dm          | nny        | vs 541      |                    |      |
| dmm         | ccw        | hzmm 131.67 |                    |      |
| dmt         | 11905      | th 9        |                    |      |
| pp1v1       | 51         |             |                    |      |
| pp          | 24.000     |             |                    |      |

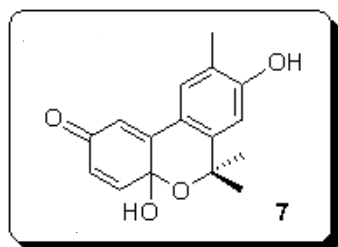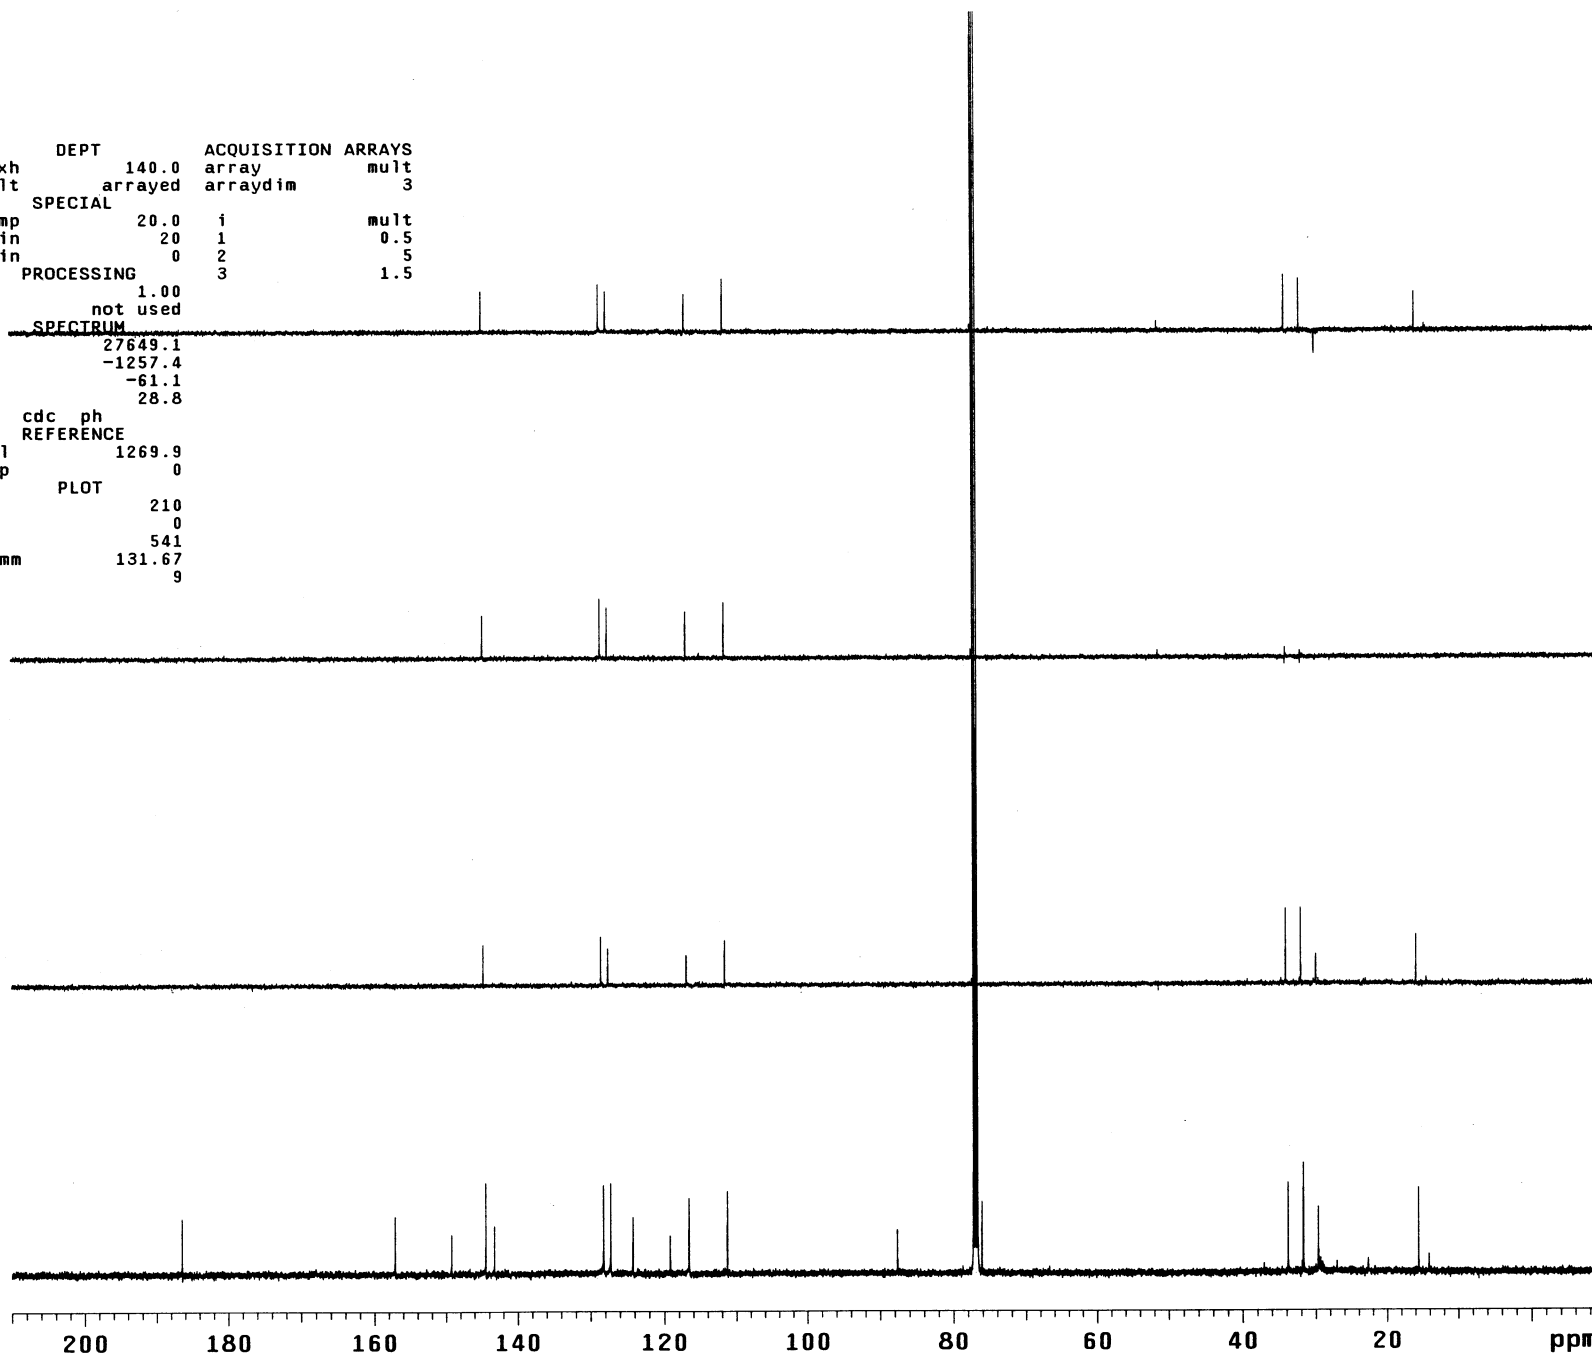Fig S32. DEPT of compound 7 (CDCl<sub>3</sub>).

Fig S33. COSY of compound 7 (CDCl<sub>3</sub>).

tcw-6-61-F2

exp26 gCOSY

| SAMPLE         |            | FLAGS         |          |
|----------------|------------|---------------|----------|
| date           | Nov 5 2009 | hs            | nn       |
| solvent        | cdcl3      | sspul         | n        |
| sample         | undefined  | hsglv1        | 1026     |
| ACQUISITION    |            | SPECIAL       |          |
| sw             | 3348.8     | temp          | 20.0     |
| at             | 0.153      | gain          | 34       |
| np             | 1024       | spin          | 0        |
| fb             | 2000       | F2 PROCESSING |          |
| ss             | 16         | sb            | -0.076   |
| d1             | 1.000      | sbs           | not used |
| nt             | 16         | fn            | 1024     |
| 2D ACQUISITION |            | F1 PROCESSING |          |
| sw1            | 3348.8     | sb1           | -0.038   |
| ni             | 128        | sbs1          | not used |
| TRANSMITTER    |            | proc1         |          |
| tn             | H1         | fn1           | 1024     |
| sfrq           |            | DISPLAY       |          |
| tof            | -175.0     | sp            | 637.4    |
| tpwr           | 59         | wp            | 3342.3   |
| pw             | 13.500     | sp1           | 637.8    |
| GRADIENTS      |            | wp1           |          |
| gzlv11         | 1026       | rfl           | 3342.3   |
| gt1            | 0.001000   | rfl           | 2529.0   |
| gstab          | 0.000500   | rfl1          | 3159.9   |
| DECOUPLER      |            | rfl1          |          |
| dn             | C13        | 3159.9        |          |
| dm             | nnn        | PLOT          |          |
|                |            | wc            | 155.0    |
|                |            | sc            | 10.0     |
|                |            | wc2           | 155.0    |
|                |            | sc2           | 0        |
|                |            | vs            | 28       |
|                |            | th            | 6        |
|                |            | a1            | cdc av   |

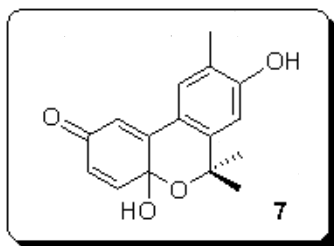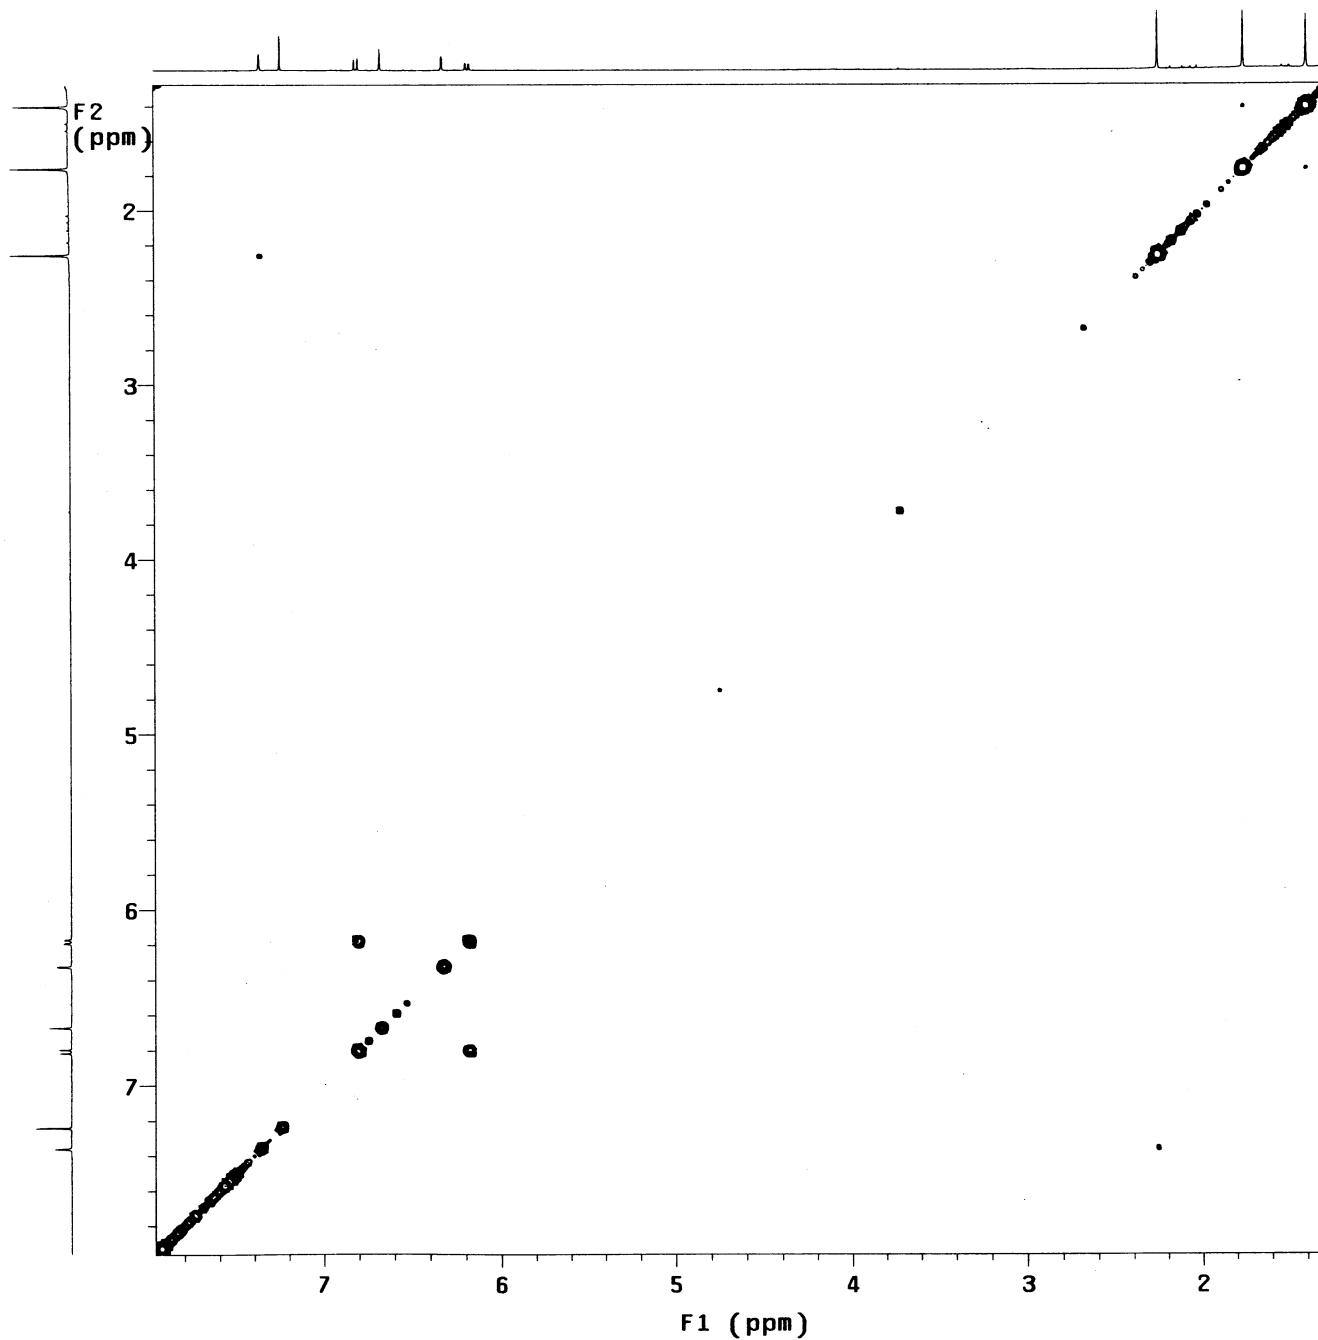

Fig S34. HSQC of compound 7 (CDCl3).

tcw-6-61-F2

exp32 gHSQC

| SAMPLE         |            | FLAGS         | ACQUISITION |          | ARRAYS |
|----------------|------------|---------------|-------------|----------|--------|
| date           | Nov 5 2009 | hs            | n           | array    | phase  |
| solvent        | cdc13      | sspul         | y           | arraydim | 256    |
| sample         | undefined  | PFGflg        | y           |          |        |
| ACQUISITION    |            | hsglv1        | 1026        | 1        | phase  |
| sw             | 3348.8     | SPECIAL       | 1           | 1        | 1      |
| at             | 0.153      | temp          | 20.0        | 2        | 2      |
| np             | 1024       | gain          | 54          |          |        |
| fb             | 2000       | spin          | 0           |          |        |
| ss             | 32         | GRADIENTS     |             |          |        |
| d1             | 1.000      | gzlv11        | 1026        |          |        |
| nt             | 16         | gt1           | 0.002000    |          |        |
| 2D ACQUISITION |            | gzlv13        | 516         |          |        |
| sw1            | 21367.5    | gt3           | 0.001000    |          |        |
| ni             | 128        | gstab         | 0.000500    |          |        |
| phase          | arrayed    | F2 PROCESSING |             |          |        |
| TRANSMITTER    |            | gf            | 0.071       |          |        |
| tn             | H1         | gfs           | not used    |          |        |
| sfrq           | 499.829    | fn            | 1024        |          |        |
| tof            | -175.0     | F1 PROCESSING |             |          |        |
| tpwr           | 59         | gf1           | 0.005       |          |        |
| pw             | 13.500     | gfs1          | not used    |          |        |
| DECOUPLER      |            | proc1         | 1p          |          |        |
| dn             | C13        | fn1           | 2048        |          |        |
| dof            | -2515.2    | DISPLAY       |             |          |        |
| dm             | nny        | sp            | 648.5       |          |        |
| dmm            | ccp        | wp            | 3139.5      |          |        |
| dmf            | 32258      | sp1           | 1445.4      |          |        |
| dpwr           | 35         | wp1           | 16964.6     |          |        |
| pwxlvl         | 51         | rf1           | 2530.0      |          |        |
| pw             | 14.700     | rfl           | 3158.9      |          |        |
| HSQC           |            | rfl1          | 15958.3     |          |        |
| j1xh           | 140.0      | rfl1          | 14649.3     |          |        |
| nullflg        | y          | PLOT          |             |          |        |
| mult           | 2          | wc            | 150.0       |          |        |
|                |            | sc            | 6.2         |          |        |
|                |            | wc2           | 116.2       |          |        |
|                |            | sc2           | 0           |          |        |
|                |            | vs            | 524         |          |        |
|                |            | th            | 6           |          |        |
|                |            | ai            | cdc         | ph       |        |

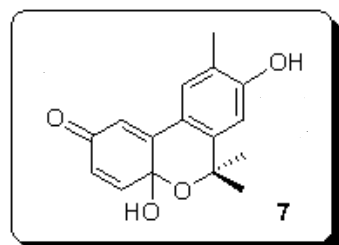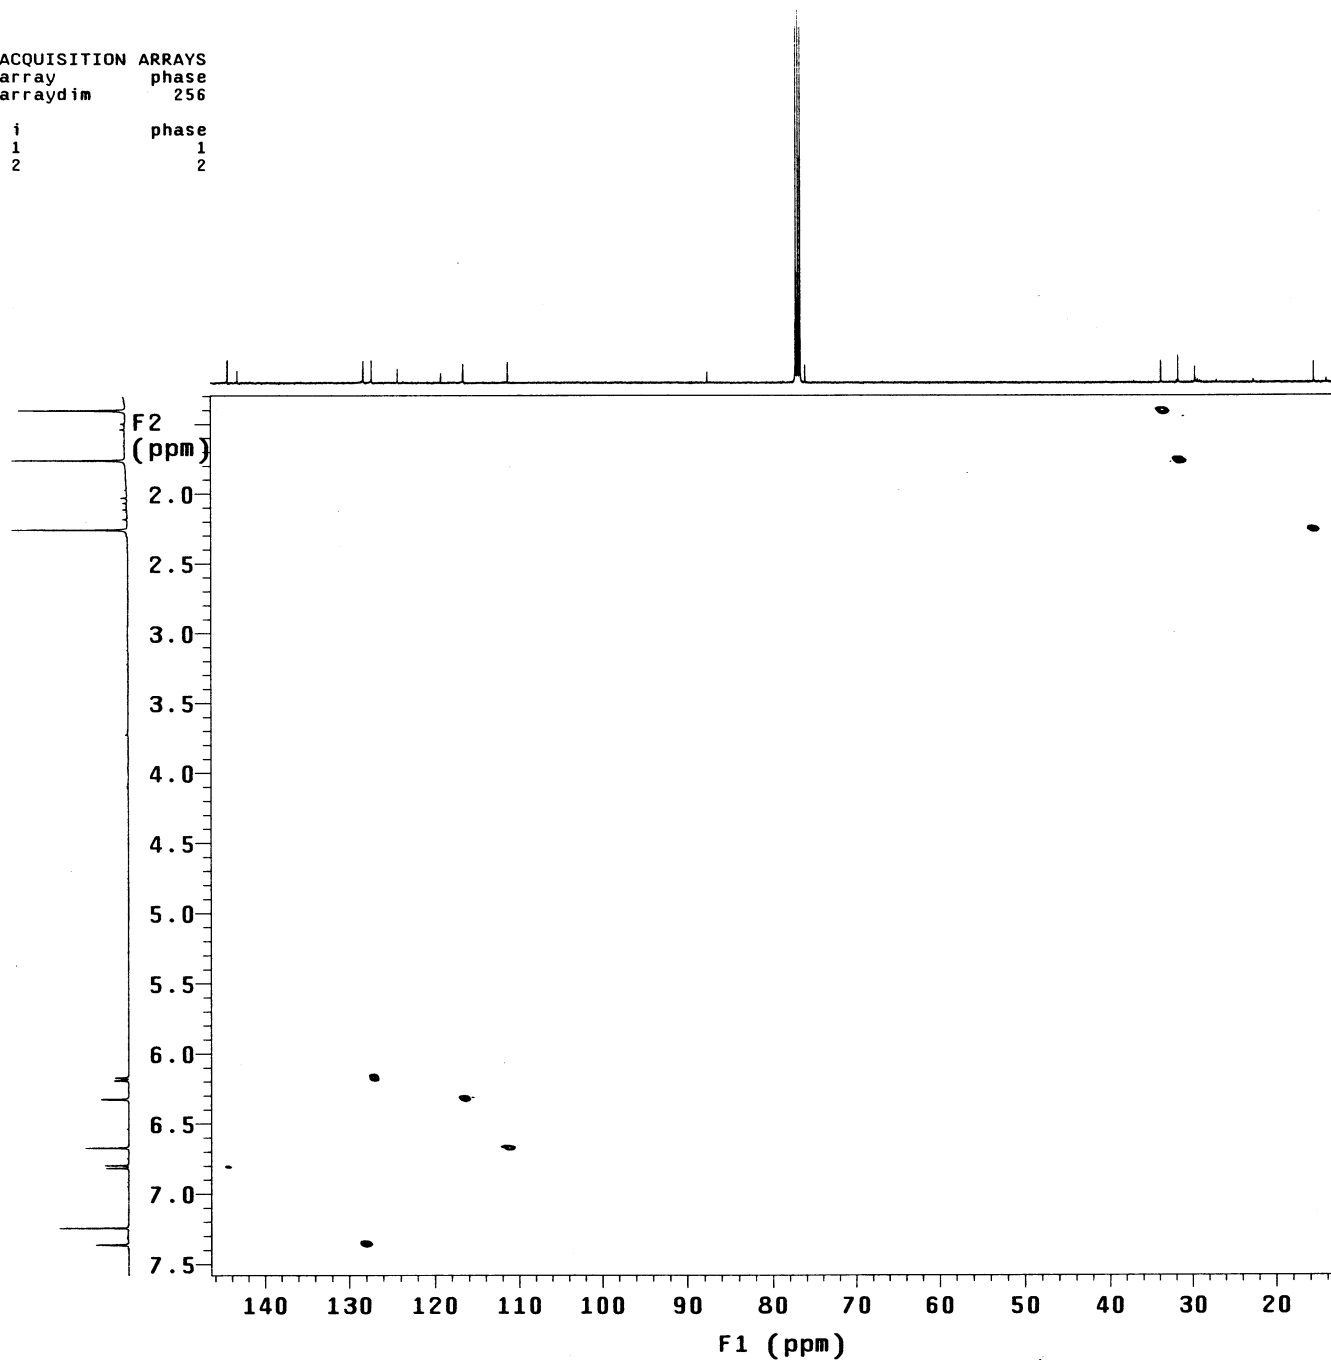

Fig S35. NOESY of compound 7 (CDCl<sub>3</sub>).

tcw-6-61-F2

exp27 NOESY

| SAMPLE         |            | FLAGS         |          | n |
|----------------|------------|---------------|----------|---|
| date           | Nov 5 2009 | hs            |          | y |
| solvent        | cdcl3      | sspul         |          | y |
| sample         | undefined  | PFGflg        |          | y |
| ACQUISITION    |            | hsglvi        | 1026     |   |
| sw             | 3348.8     | SPECIAL       |          |   |
| at             | 0.153      | temp          | 20.0     |   |
| np             | 1024       | gain          | 54       |   |
| fb             | 2000       | spin          | 0        |   |
| ss             | 32         | F2 PROCESSING |          |   |
| dl             | 1.000      | gf            | 0.071    |   |
| nt             | 8          | gfs           | not used |   |
| 2D ACQUISITION |            | fn            | 1024     |   |
| sw1            | 3348.8     | F1 PROCESSING |          |   |
| ni             | 200        | gf1           | 0.027    |   |
| TRANSMITTER    |            | gfs1          | not used |   |
| tn             | H1         | fn1           | 1024     |   |
| sfrq           | 499.829    | DISPLAY       |          |   |
| tof            | -175.0     | sp            | 650.5    |   |
| tpwr           | 59         | wp            | 3244.2   |   |
| pw             | 13.500     | sp1           | 654.1    |   |
| NOESY          |            | wp1           | 3244.2   |   |
| mix            | 0.600      | rfl           | 2528.0   |   |
| PRESATURATION  |            | rfp           | 3158.9   |   |
| satmode        | nnnn       | rfl1          | 2524.4   |   |
| satpwr         | 0          | rfp1          | 3158.9   |   |
| satdly         | 0          | PLOT          |          |   |
| satfrq         | 0          | wc            | 155.0    |   |
| DECOUPLER      |            | sc            | 10.0     |   |
| dn             | C13        | wc2           | 155.0    |   |
| dm             | nnn        | sc2           | 0        |   |
|                |            | vs            | 301      |   |
|                |            | th            | 4        |   |
|                |            | ai            | ph       |   |

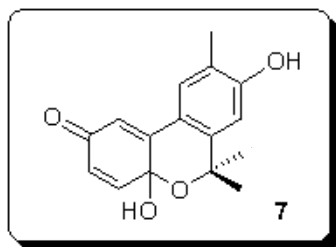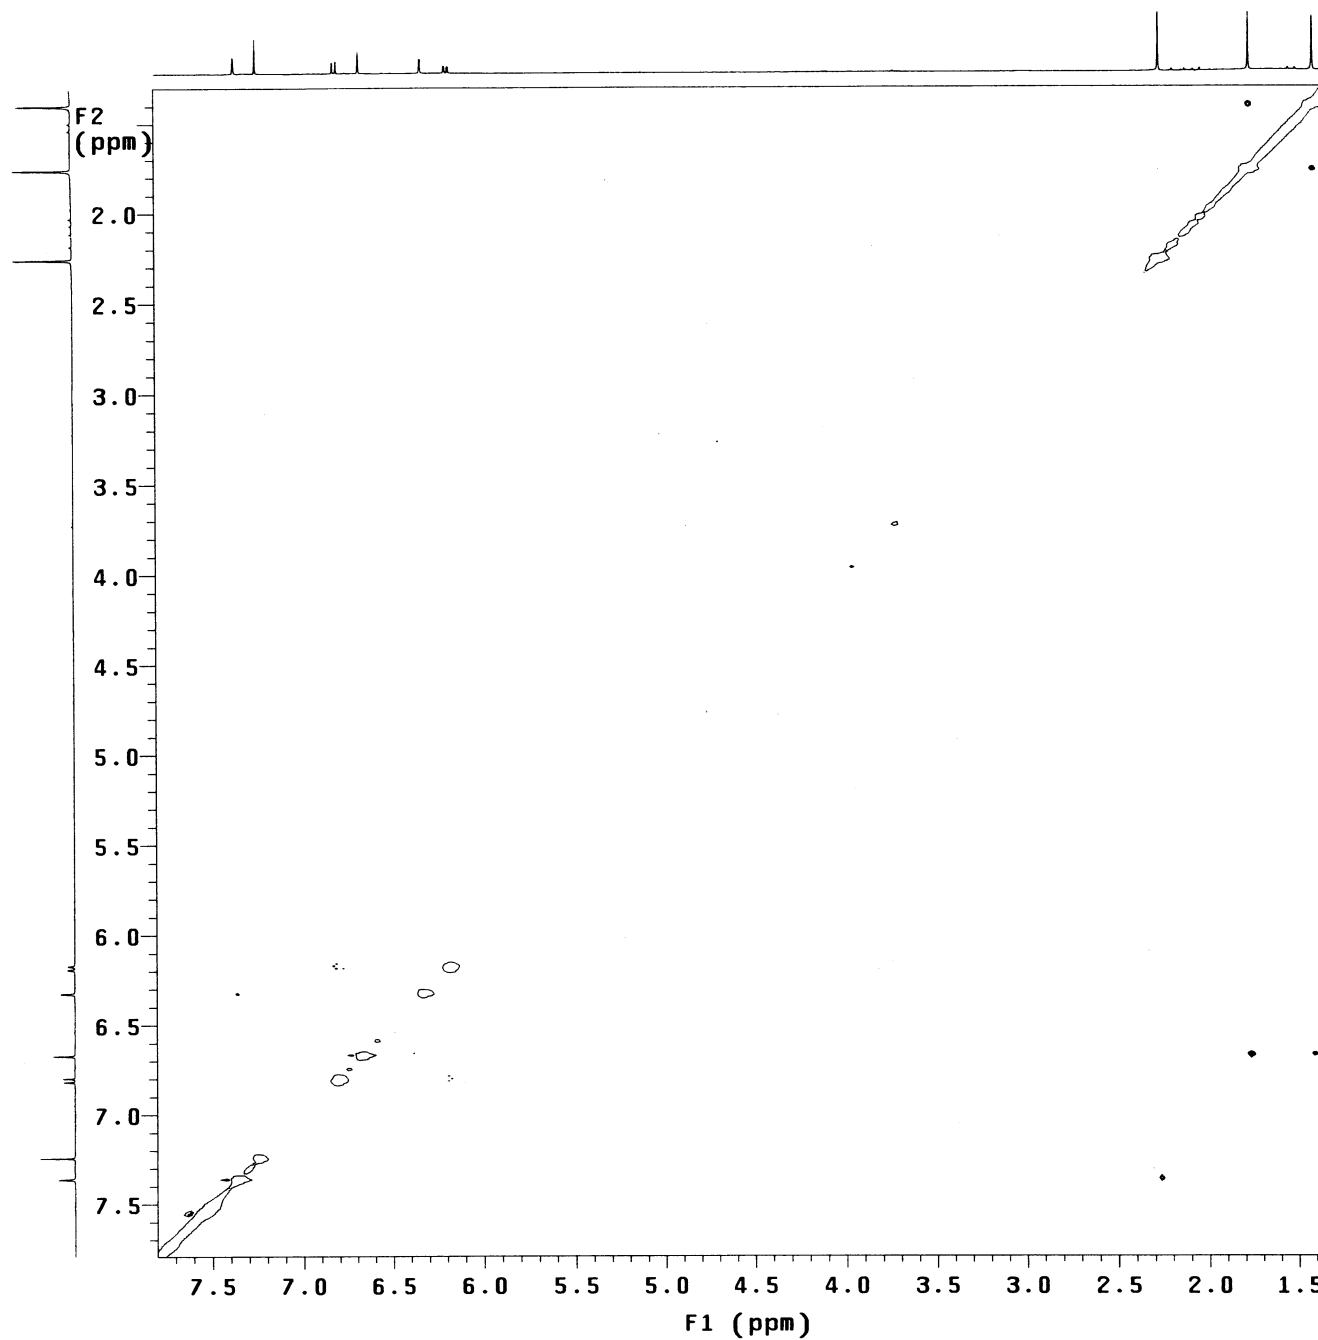

Fig S36. <sup>1</sup>H NMR of compound 8 (500 MHz, CDCl<sub>3</sub>).

PMK-01-204

exp31 s2pul

SAMPLE  
 date Mar 31 2009 dfrq 125.695  
 solvent cdc13 dn C13  
 file /export/home/~ dpwr 30  
 vnmr1/vnmrSYS/data~ dof 0  
 /PMK/PMK-01-204/H.~ dm hnn  
 fid dmm c  
 dm 200  
 ACQUISITION  
 sfrq 499.836 dseq  
 tn H1 dres 1.0  
 at 3.000 homo n  
 np 48000  
 sw 8000.0 wtfile  
 fb 4000 proc  
 bs 4 fn not used  
 tpwr 57 math f  
 pw 4.8  
 d1 1.000 werr  
 tof 499.7 wexp react  
 nt 4 wbs  
 ct 4 wnt  
 wft  
 alock y  
 gain not used  
 FLAGS  
 il n  
 in n  
 dp y  
 hs nn  
 DISPLAY  
 sp -250.1  
 wp 5498.0  
 vs 41  
 sc 0  
 wc 210  
 hzmm 26.18  
 is 147.72  
 rfl 4632.8  
 rfp 3618.8  
 th 2  
 ins 100.000  
 nm ph

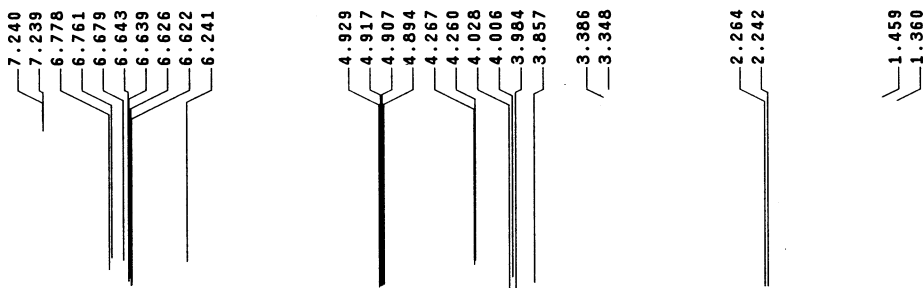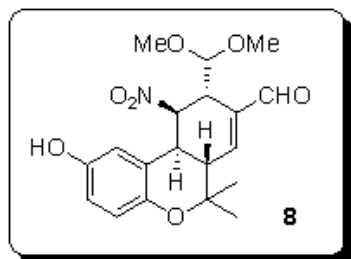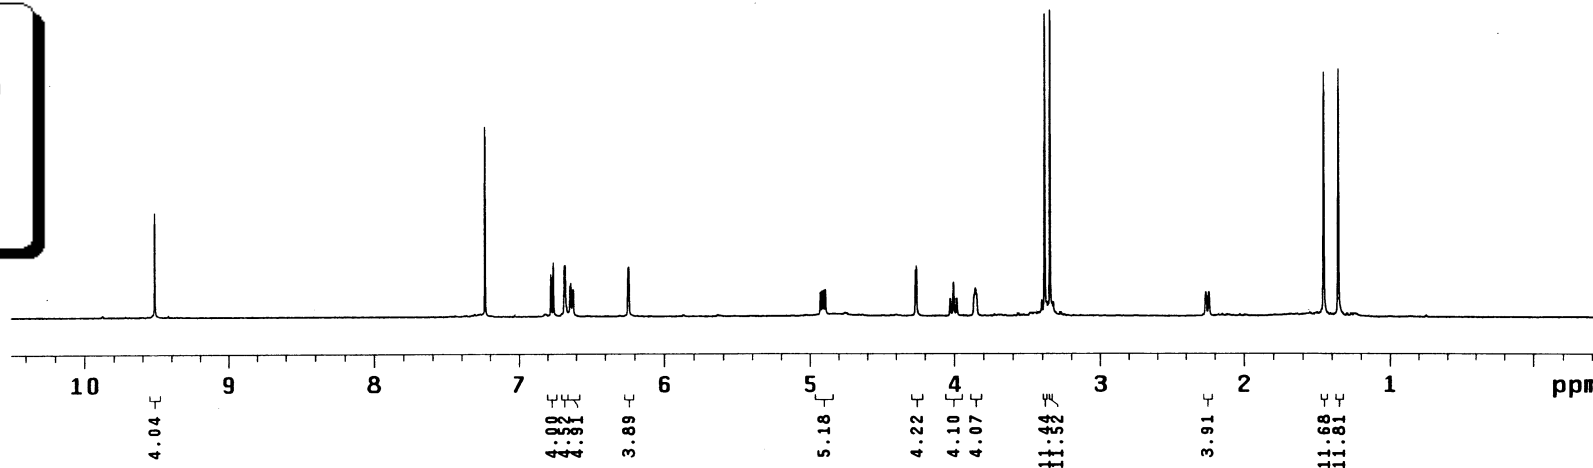

Fig S37. <sup>13</sup>C NMR of compound 8 (125 MHz, CDCl<sub>3</sub>).

S37

PMK-01-204  
exp43 s2pul

| SAMPLE      |             | DEC. & VT |          |
|-------------|-------------|-----------|----------|
| date        | Mar 31 2009 | dfrq      | 499.836  |
| solvent     | cdcl3       | dn        | H1       |
| file        | exp         | dpwr      | 39       |
| ACQUISITION |             |           |          |
| sfrq        | 125.698     | dof       | 0        |
| tn          | C13         | dm        | yyy      |
| at          | 1.000       | dmm       | w        |
| np          | 62894       | dmf       | 11905    |
| sw          | 31446.5     | dseq      |          |
| fb          | 17000       | dres      | 1.0      |
| bs          | 16          | homo      | n        |
| PROCESSING  |             |           |          |
| ss          | 2           | lb        | 1.00     |
| tpwr        | 54          | wtfile    |          |
| pw          | 4.0         | proc      | ft       |
| d1          | 1.000       | fn        | not used |
| tof         | 2512.2      | math      | f        |
| nt          | 20000       |           |          |
| ct          | 9552        | werr      | react    |
| alock       | y           | wexp      | procplot |
| gain        | not used    | wbs       | testsn   |
| flags       |             | wnt       |          |
| fl          | n           |           |          |
| in          | n           |           |          |
| dp          | y           |           |          |
| hs          | nn          |           |          |
| DISPLAY     |             |           |          |
| sp          | -1256.9     |           |          |
| wp          | 27650.1     |           |          |
| vs          | 326         |           |          |
| sc          | 0           |           |          |
| wc          | 210         |           |          |
| hzmm        | 131.67      |           |          |
| is          | 500.00      |           |          |
| rfl         | 10981.5     |           |          |
| rfp         | 9677.6      |           |          |
| th          | 7           |           |          |
| ins         | 100.000     |           |          |
| nm          | ph          |           |          |

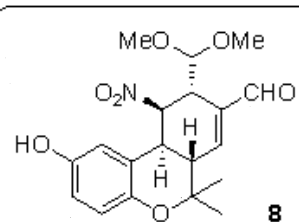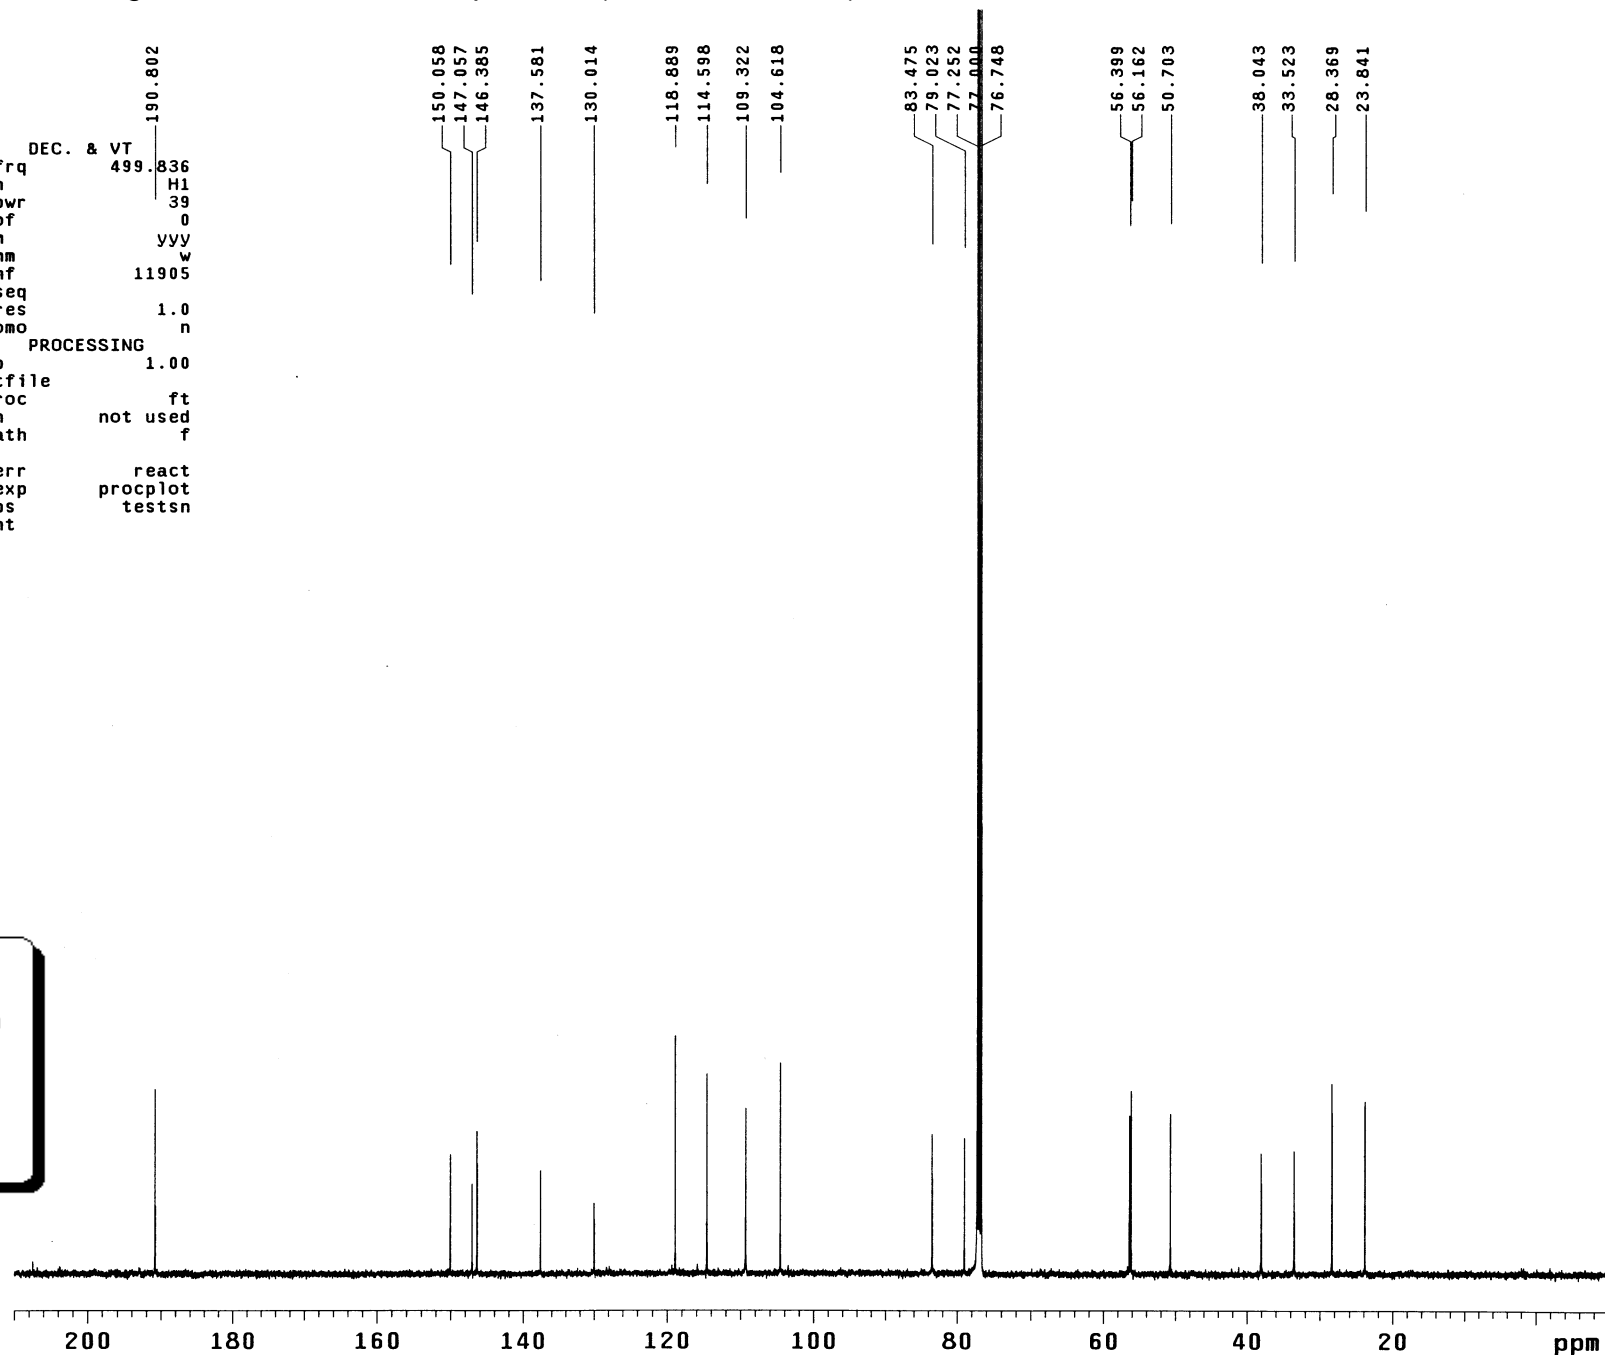

Fig S38. DEPT of compound 8 (CDCl<sub>3</sub>).

S38

PMK-01-204

exp21 DEPT

| SAMPLE      |             | DEPT       |          | ACQUISITION ARRAYS |      |
|-------------|-------------|------------|----------|--------------------|------|
| date        | Apr 28 2009 | j1xh       | 140.0    | array              | mult |
| solvent     | cdcl3       | mult       | arrayed  | arraydim           | 3    |
| sample      | undefined   | SPECIAL    |          |                    |      |
| ACQUISITION |             | temp       | not used | i                  | mult |
| sw          | 31446.5     | gain       | 54       | 1                  | 0.5  |
| at          | 1.000       | spin       | 0        | 2                  | 1    |
| np          | 62894       | PROCESSING |          | 3                  | 1.5  |
| bs          | 16          | lb         | 1.00     |                    |      |
| ss          | -4          | fn         | not used |                    |      |
| d1          | 1.000       | SPECTRUM   |          |                    |      |
| nt          | 3000        | wp         | 27690.1  |                    |      |
| ct          | 2656        | sp         | -1257.2  |                    |      |
| TRANSMITTER |             | rp         | -57.8    |                    |      |
| tn          | C13         | lp         | 69.0     |                    |      |
| tof         | 2512.2      | al         | cdc ph   |                    |      |
| tpwr        | 54          | REFERENCE  |          |                    |      |
| pw          | 9.400       | rfl        | 1269.7   |                    |      |
| DECOUPLER   |             | rfp        | 0        |                    |      |
| dn          | H1          | PLOT       |          |                    |      |
| dof         | 0           | wc         | 210      |                    |      |
| dpwr        | 39          | sc         | 0        |                    |      |
| dm          | nny         | vs         | 566      |                    |      |
| dmm         | ccw         | hzmm       | 131.67   |                    |      |
| dmf         | 11905       | th         | 68       |                    |      |
| pp1v1       | 49          |            |          |                    |      |
| pp          | 29.400      |            |          |                    |      |

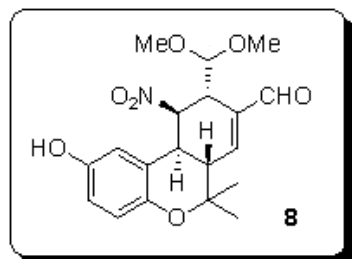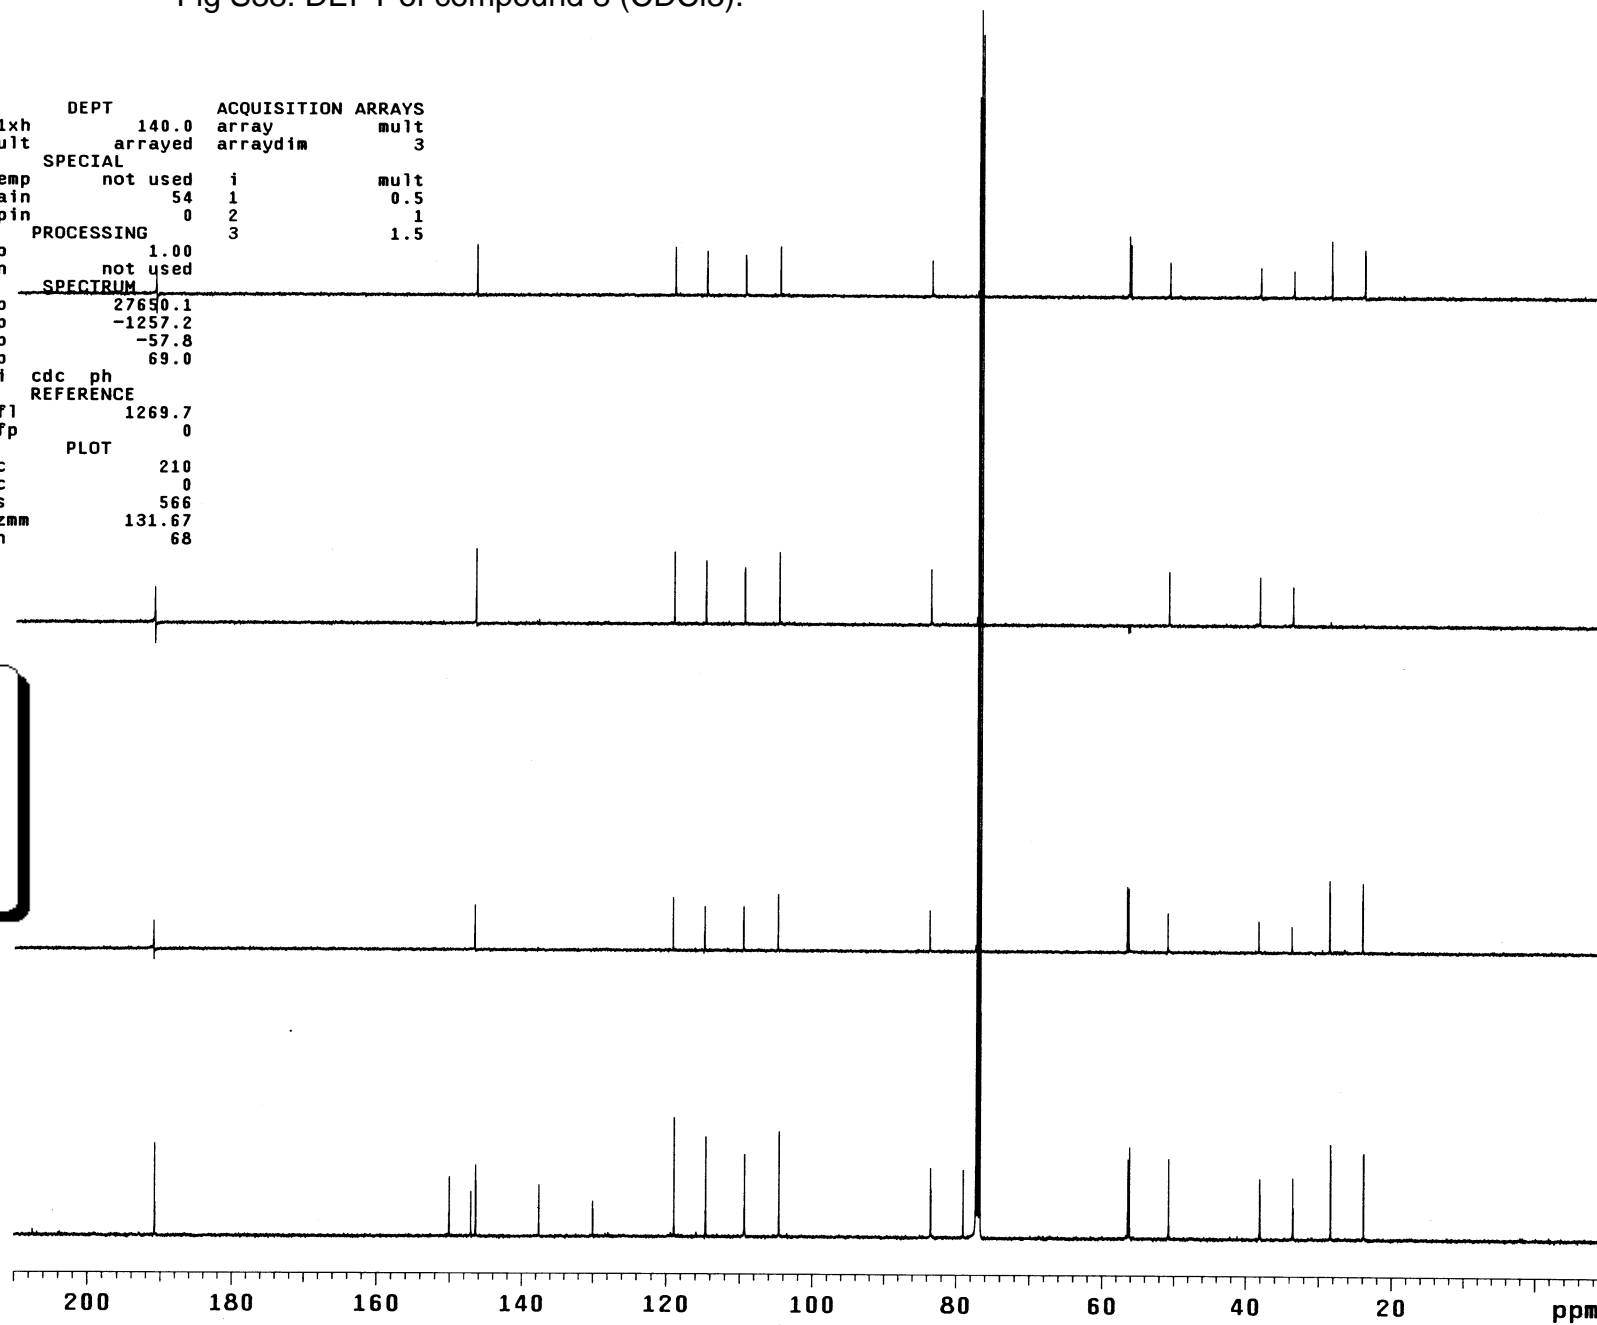

Fig S39. HSQC of compound 8 (CDCl<sub>3</sub>).

S39

PMK-01-204

exp18 gHSQC

| SAMPLE         |             | FLAGS         | ACQUISITION ARRAYS |          |
|----------------|-------------|---------------|--------------------|----------|
| date           | Apr 15 2009 | hs            | n                  | array    |
| solvent        | cdc13       | sspul         | y                  | arraydim |
| sample         | undefined   | PFGflg        | y                  | phase    |
| ACQUISITION    |             | hsglv1        | 1026               | 256      |
| sw             | 4498.4      | SPECIAL       | 1                  | phase    |
| at             | 0.228       | temp          | 21.0               | 1        |
| np             | 2048        | gain          | 60                 | 2        |
| fb             | 3000        | spin          | 0                  |          |
| ss             | 32          | GRADIENTS     |                    |          |
| d1             | 1.000       | gzlv11        | 1026               |          |
| nt             | 16          | gt1           | 0.002000           |          |
| 2D ACQUISITION |             | gzlv13        | 516                |          |
| sw1            | 21367.5     | gt3           | 0.001000           |          |
| ni             | 128         | gstab         | 0.000500           |          |
| phase          | arrayed     | F2 PROCESSING |                    |          |
| TRANSMITTER    |             | gf            | 0.105              |          |
| tn             | H1          | gfs           | not used           |          |
| sfrq           | 499.836     | fn            | 2048               |          |
| tof            | 249.8       | F1 PROCESSING |                    |          |
| tpwr           | 57          | gf1           | 0.006              |          |
| pw             | 13.000      | gfs1          | not used           |          |
| DECOUPLER      |             | procl         | 1p                 |          |
| dn             | C13         | fn1           | 2048               |          |
| dof            | -2515.1     | DISPLAY       |                    |          |
| dm             | nny         | sp            | 512.6              |          |
| dmm            | ccp         | wp            | 3409.0             |          |
| dmf            | 32258       | sp1           | 2173.8             |          |
| dpwr           | 35          | wp1           | 16589.0            |          |
| pwxlvl         | 51          | rf1           | 2633.2             |          |
| pw             | 14.700      | rfl           | 3119.5             |          |
| HSQC           |             | rfl1          | 15030.0            |          |
| j1xh           | 140.0       | rflp1         | 13739.9            |          |
| nullflg        | y           | PLOT          |                    |          |
| mult           | 2           | wc            | 150.0              |          |
|                |             | sc            | 6.2                |          |
|                |             | wc2           | 150.2              |          |
|                |             | sc2           | 0                  |          |
|                |             | vs            | 113                |          |
|                |             | th            | 4                  |          |
|                |             | al            | cdc                | ph       |

F2  
(ppm)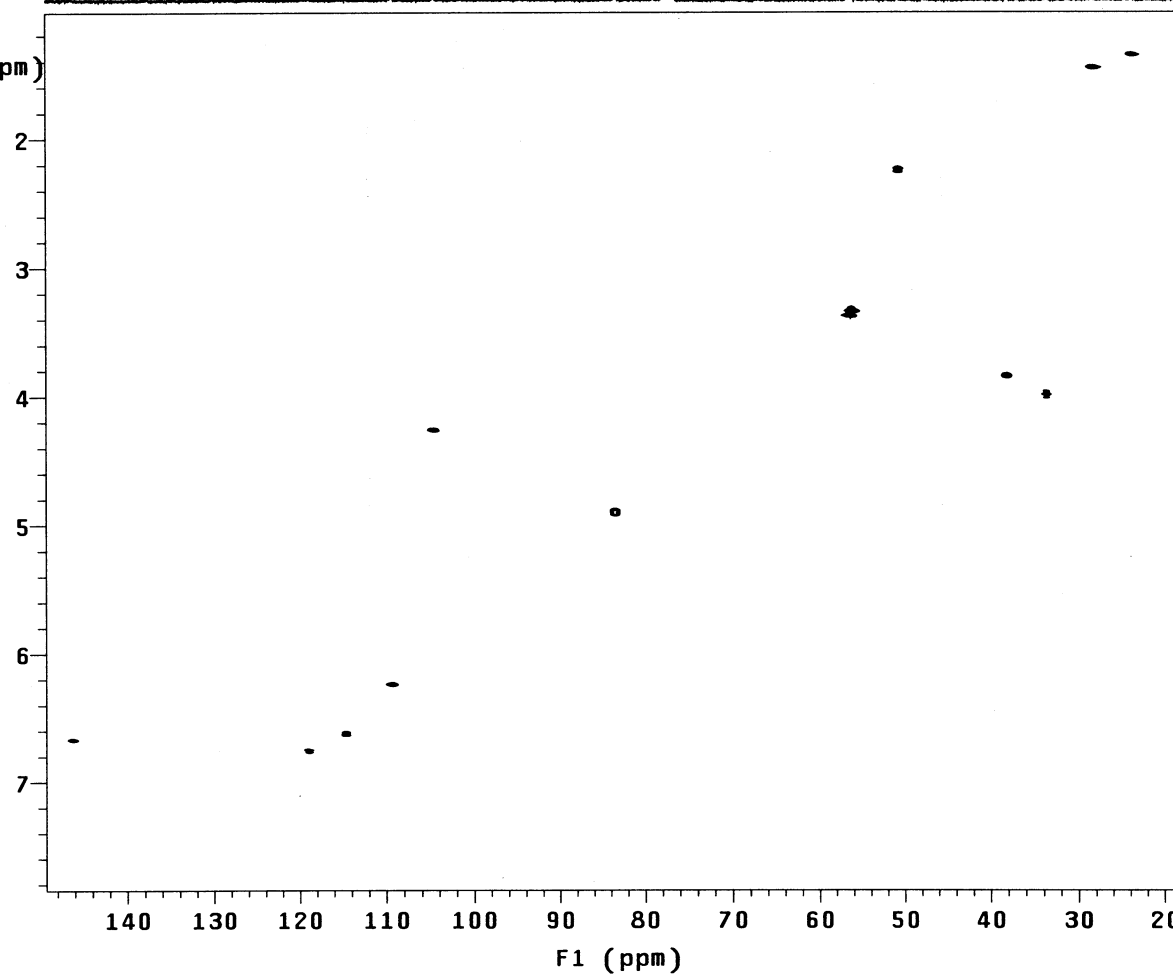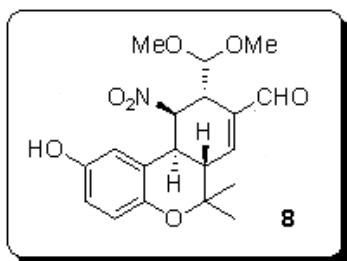

Fig S40. COSY of compound 8 (CDCl<sub>3</sub>).

S40

PMK-01-204

exp12 gCOSY

| SAMPLE         |             | FLAGS         |          |
|----------------|-------------|---------------|----------|
| date           | Apr 27 2009 | hs            | nn       |
| solvent        | cdcl3       | sspul         | n        |
| sample         | undefined   | hsglvl        | 1026     |
| ACQUISITION    |             | SPECIAL       | not used |
| sw             | 4498.4      | temp          | 40       |
| at             | 0.228       | gain          | 0        |
| np             | 2048        | spin          | 0        |
| fb             | 3000        | F2 PROCESSING |          |
| ss             | 16          | sb            | -0.114   |
| d1             | 1.000       | sbs           | not used |
| nt             | 16          | fn            | 2048     |
| 2D ACQUISITION |             | F1 PROCESSING |          |
| sw1            | 4498.4      | sb1           | -0.006   |
| n1             | 128         | sbs1          | not used |
| TRANSMITTER    |             | proc1         | 1p       |
| tn             | H1          | fni           | 2048     |
| sfrq           | 499.836     | DISPLAY       |          |
| tof            | 249.8       | sp            | 488.8    |
| tpwr           | 57          | wp            | 4494.0   |
| pw             | 13.000      | sp1           | 4494.0   |
| GRADIENTS      |             | wp1           | 2635.0   |
| gzlv11         | 1026        | rfl           | 3119.5   |
| gt1            | 0.001000    | rfp           | 2632.1   |
| gstab          | 0.000500    | rfl1          | 3119.4   |
| DECOUPLER      |             | rfp1          |          |
| dn             | C13         | PLOT          |          |
| dm             | nnn         | wc            | 155.0    |
|                |             | sc            | 10.0     |
|                |             | wc2           | 155.0    |
|                |             | sc2           | 0        |
|                |             | vs            | 113      |
|                |             | th            | 7        |
|                |             | a1            | cdc av   |

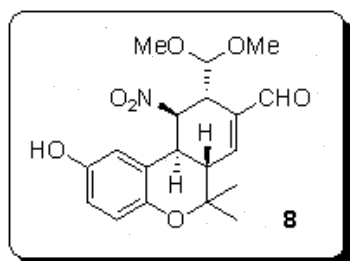F2  
(ppm)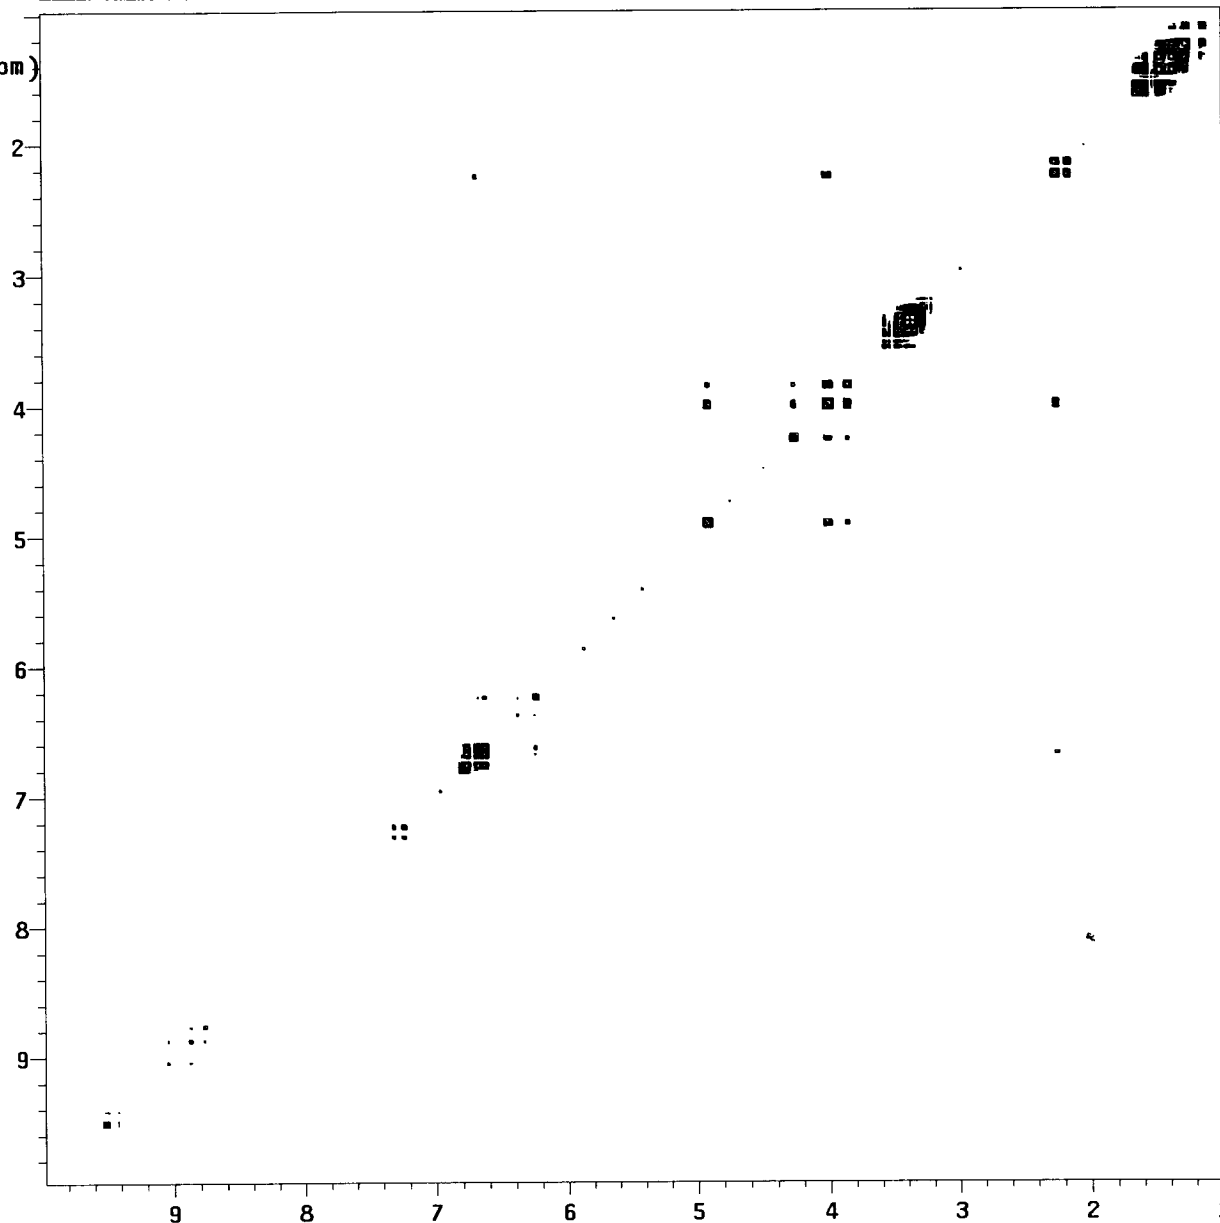

F1 (ppm)

Fig S41. NOESY of compound 8 (CDCl<sub>3</sub>).

PMK-01-204

exp22 NOESY

| SAMPLE         |             | FLAGS         |          |   |
|----------------|-------------|---------------|----------|---|
| date           | Apr 28 2009 | hs            |          | n |
| solvent        | cdc13       | sspu1         |          | y |
| sample         | undefined   | PFGflg        |          | y |
| ACQUISITION    |             | hsglv1        | 1026     |   |
| sw             | 4498.4      | SPECIAL       |          |   |
| at             | 0.228       | temp          | not used |   |
| np             | 2048        | gain          | 54       |   |
| fb             | 3000        | spin          | 0        |   |
| ss             | 32          | F2 PROCESSING |          |   |
| d1             | 1.000       | gf            | 0.105    |   |
| nt             | 16          | gfs           | not used |   |
| 2D ACQUISITION |             | fn            | 2048     |   |
| sw1            | 4498.4      | F1 PROCESSING |          |   |
| ni             | 200         | gf1           | 0.041    |   |
| TRANSMITTER    |             | gfs1          | not used |   |
| tn             | H1          | proc1         | lp       |   |
| sfrq           | 499.836     | fn1           | 2048     |   |
| tof            | 249.8       | DISPLAY       |          |   |
| tpwr           | 57          | sp            | 489.5    |   |
| pw             | 13.000      | wp            | 4494.0   |   |
| NOESY          |             | sp1           | 494.4    |   |
| mix            | 0.600       | wp1           | 4494.0   |   |
| PRESATURATION  |             | rfl           | 3133.7   |   |
| satmode        | nnnn        | rfp           | 3618.8   |   |
| satpwr         | 0           | rfl1          | 3128.8   |   |
| satdly         | 0           | rfl1          | 3618.8   |   |
| satfrq         | 0           | PLOT          |          |   |
| DECOUPLER      |             | wc            | 155.0    |   |
| dn             | C13         | sc            | 10.0     |   |
| dm             | nnn         | wc2           | 155.0    |   |
|                |             | sc2           | 0        |   |
|                |             | vs            | 1814     |   |
|                |             | th            | 1        |   |
|                |             | ai            |          |   |
|                |             | ph            |          |   |

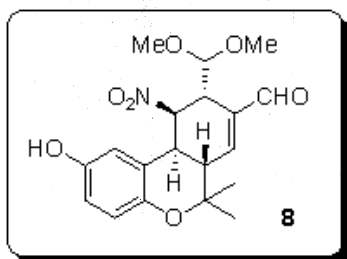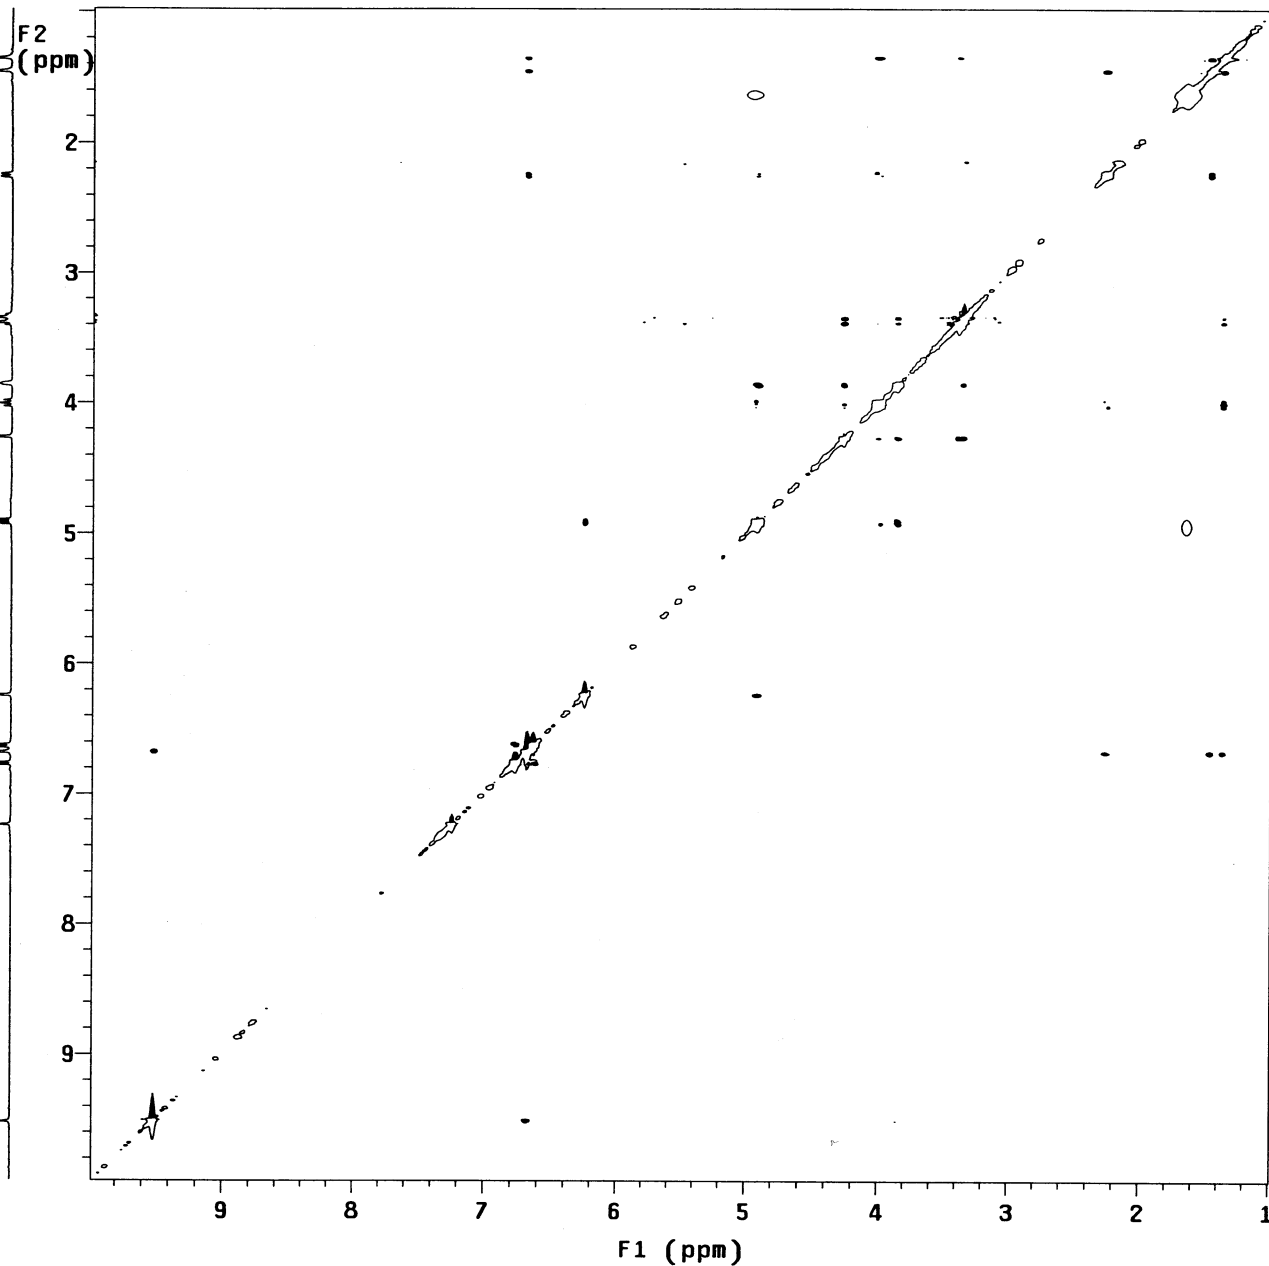

Fig S42. <sup>1</sup>H NMR of compound 9 (500 MHz, CDCl<sub>3</sub>).

S42

PMK-01-206

exp11 s2pul

SAMPLE DEC. & VT  
 date May 1 2009 dfrq 125.695  
 solvent cdc13 dn C13  
 file exp dpwr 30  
 ACQUISITION dof 0  
 sfrq 499.836 dm nnn  
 tn H1 dmm c  
 at 3.000 dmf 200  
 np 48000 dseq  
 sw 8000.0 dres 1.0  
 fb 4000 homo n  
 bs 4  
 tpwr 57  
 pw 4.8  
 d1 1.000  
 tof 499.7  
 nt 4  
 ct 4  
 alock y  
 gain not used  
 FLAGS  
 il n  
 in n  
 dp y  
 hs nn  
 DISPLAY  
 sp -250.1  
 wp 4998.3  
 vs 113  
 sc 0  
 wc 210  
 hzmm 23.80  
 is 148.31  
 rfl 4631.3  
 rfp 3618.8  
 th 2  
 ins 100.000  
 nm ph  
 PROCESSING  
 wtfile  
 proc ft  
 fn not used  
 math f  
 werr react  
 wexp procplot  
 wbs  
 wnt wft

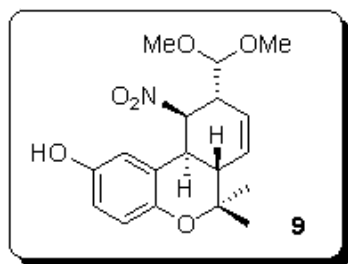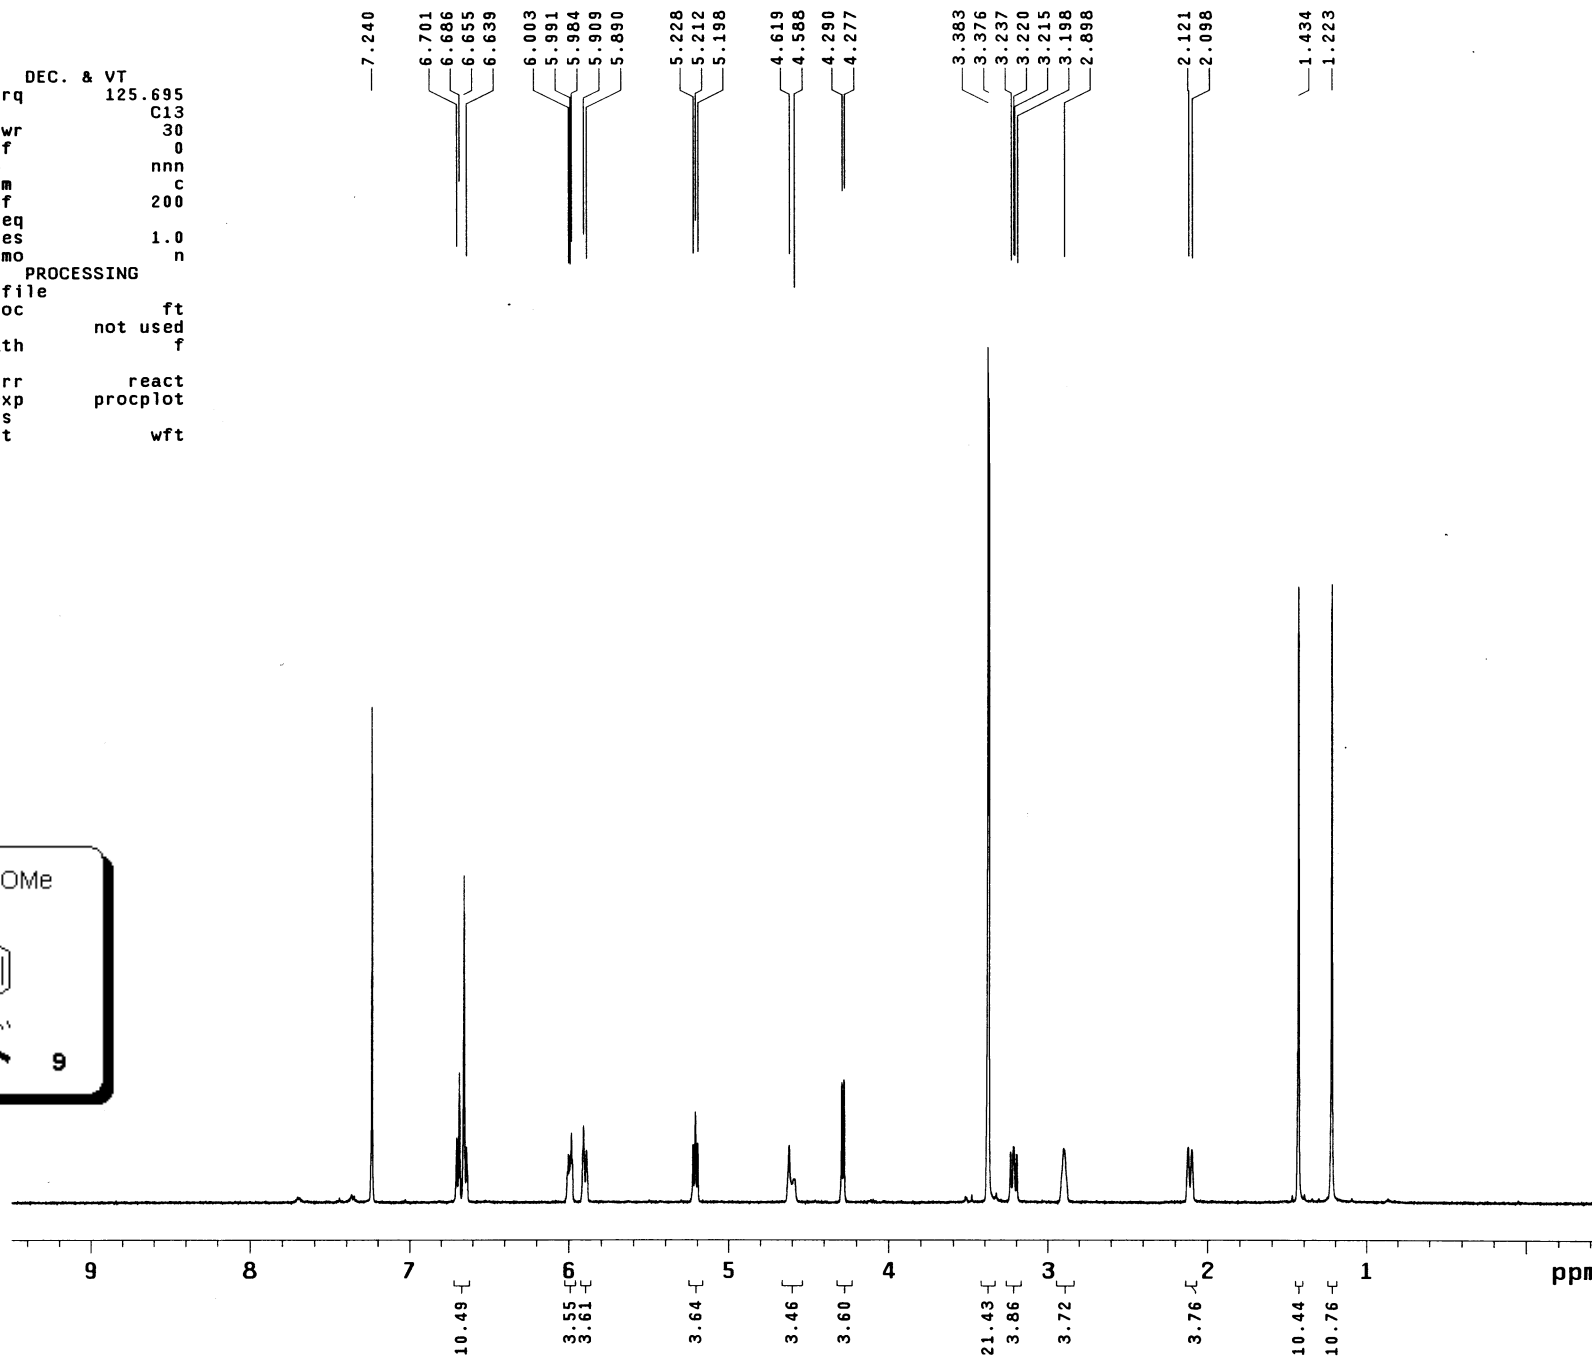

Fig S43. <sup>13</sup>C NMR of compound 9 (125 MHz, CDCl<sub>3</sub>).

PMK-01-206

exp12 s2pu1

SAMPLE DEC. & VT  
date May 1 2009 dfrq 499.836  
solvent cdc13 dn H1  
file exp dpwr 39  
ACQUISITION dof 0  
sfrq 125.698 dm yvy  
tn C13 dmm w  
at 1.000 dmf 11905  
np 62894 dseq  
sw 31446.5 dres 1.0  
fb 17000 homo n  
bs 16  
ss 2 PROCESSING lb 1.00  
tpwr 54 wtfile  
pw 4.0 proc ft  
d1 1.000 fn not used  
tof 2512.2 math f  
nt 20000  
ct 2560 werr react  
aLOCK y wexp procplot  
gain not used wbs testsn  
wnt  
FLAGS  
il n  
in n  
dp y  
hs nn  
DISPLAY  
sp -1256.9  
wp 27650.1  
vs 562  
sc 0  
wc 210  
hzmm 131.67  
is 500.00  
rfl 10979.6  
rfp 9677.6  
th 8  
ins 100.000  
nm ph

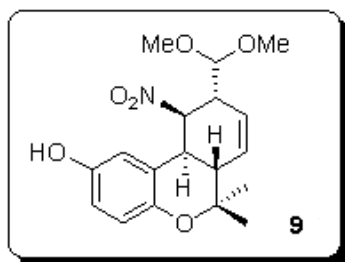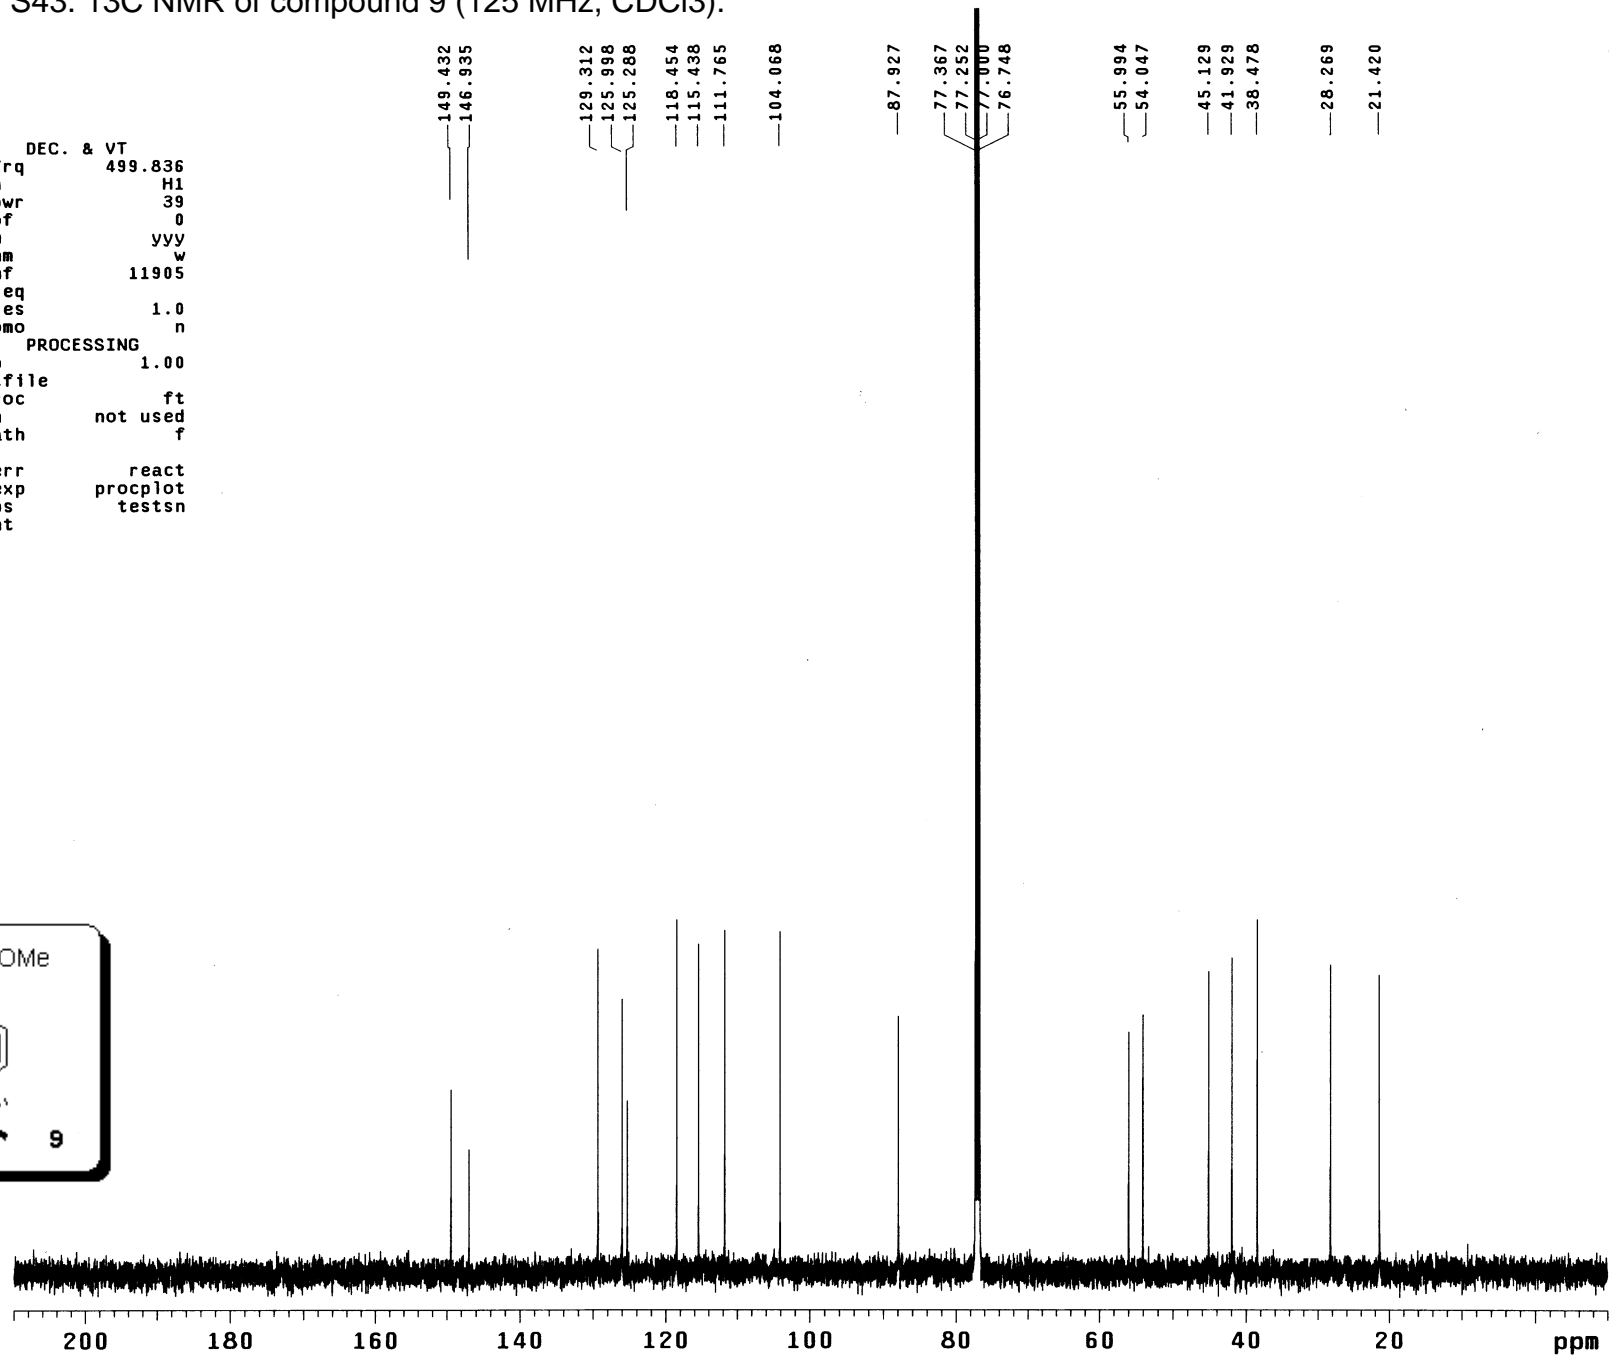

S43

Fig S44. <sup>13</sup>C NMR of compound 9 (125 MHz, CDCl<sub>3</sub>), expanded.

S44

PMK-01-206

exp31 s2pu1

| SAMPLE              |                | DEC. & VT  |          |
|---------------------|----------------|------------|----------|
| date                | May 1 2009     | dfrq       | 499.836  |
| solvent             | cdcl3          | dn         | H1       |
| file                | /export/home/~ | dpwr       | 39       |
| vnmr1/vnmrsys/data~ |                | dof        | 0        |
| /PMK/PMK-01-206/C.~ |                | dm         | yyv      |
|                     | fid            | dmm        | w        |
| ACQUISITION         |                | dmf        | 11905    |
| sfrq                | 125.698        | dseq       |          |
| tn                  | C13            | dres       | 1.0      |
| at                  | 1.000          | homo       | n        |
| np                  | 62894          | PROCESSING |          |
| sw                  | 31446.5        | lb         | 1.00     |
| fb                  | 17000          | wtfile     |          |
| bs                  | 16             | proc       | ft       |
| ss                  | 2              | fn         | not used |
| tpwr                | 54             | math       | f        |
| pw                  | 4.0            |            |          |
| d1                  | 1.000          | werr       | react    |
| tof                 | 2512.2         | wexp       | procplot |
| nt                  | 20000          | wbs        | testsn   |
| ct                  | 2560           | wnt        |          |
| alock               | y              |            |          |
| gain                | not used       |            |          |
| FLAGS               |                |            |          |
| il                  | n              |            |          |
| in                  | n              |            |          |
| dp                  | y              |            |          |
| hs                  | nn             |            |          |
| DISPLAY             |                |            |          |
| sp                  | 8169.0         |            |          |
| wp                  | 2513.4         |            |          |
| vs                  | 68             |            |          |
| sc                  | 0              |            |          |
| wc                  | 210            |            |          |
| hzmm                | 11.97          |            |          |
| is                  | 500.00         |            |          |
| rfl                 | 10979.6        |            |          |
| rfp                 | 9677.6         |            |          |
| th                  | 3              |            |          |
| ins                 | 100.000        |            |          |
| nm                  | ph             |            |          |

77.367  
77.252  
77.000  
76.748

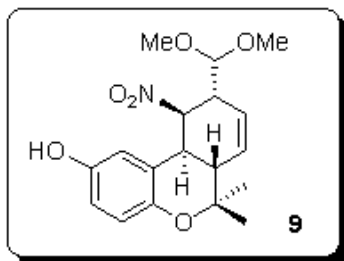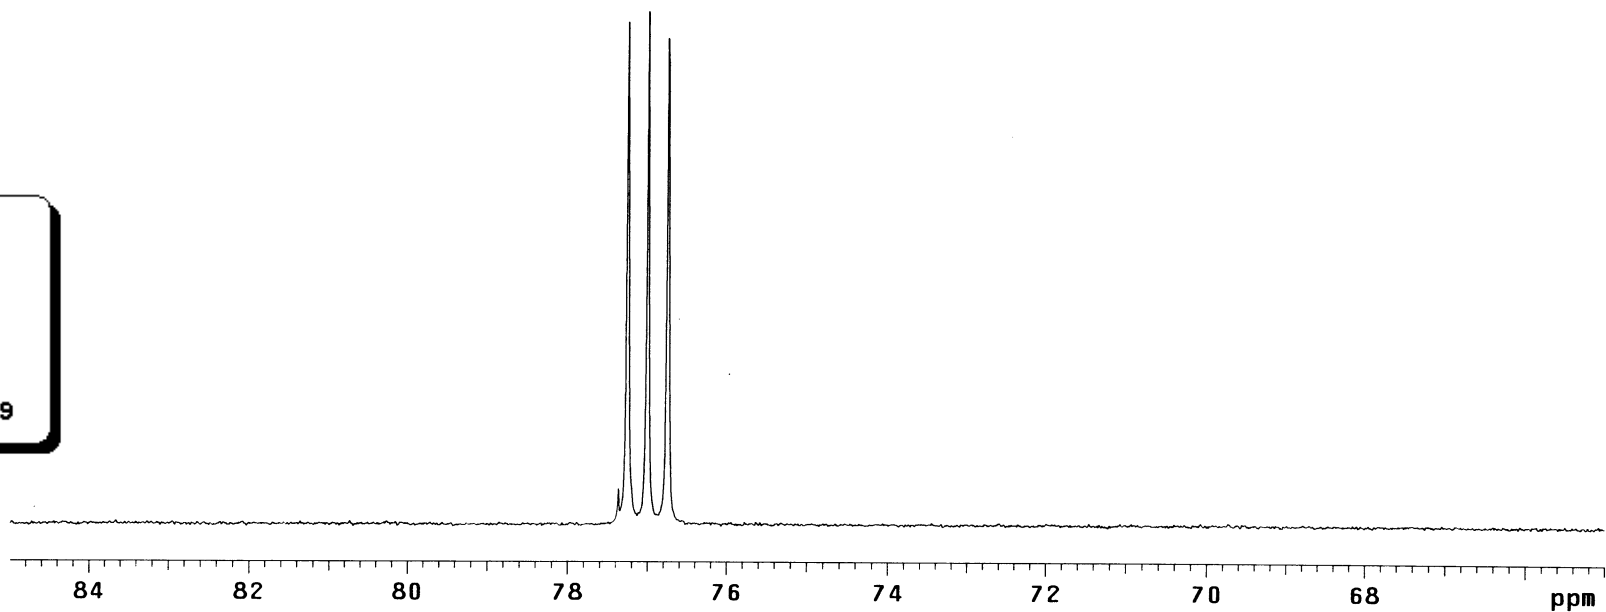

Fig S45. DEPT of compound 9 (CDCl<sub>3</sub>).

S45

PMK-01-206

exp13 DEPT

| SAMPLE      |            | DEPT       |          | ACQUISITION ARRAYS |      |
|-------------|------------|------------|----------|--------------------|------|
| date        | May 1 2009 | j1xh       | 140.0    | array              | mult |
| solvent     | cdcl3      | mult       | arrayed  | arraydim           | 3    |
| sample      | undefined  | SPECIAL    |          |                    |      |
| ACQUISITION |            | temp       | not used | i                  | mult |
| sw          | 31446.5    | gain       | 20       | 1                  | 0.5  |
| at          | 1.000      | spin       | 0        | 2                  | 1    |
| np          | 62894      | PROCESSING |          | 3                  | 1.5  |
| bs          | 16         | lb         | 1.00     |                    |      |
| ss          | -4         | fn         | not used |                    |      |
| d1          | 1.000      | SPECTRUM   |          |                    |      |
| nt          | 3000       | wp         | 27650.1  |                    |      |
| ct          | 3000       | sp         | -1257.2  |                    |      |
| TRANSMITTER |            | rp         | -66.6    |                    |      |
| tn          | C13        | lp         | 60.3     |                    |      |
| tof         | 2512.2     | ai         | cdc ph   |                    |      |
| tpwr        | 54         | REFERENCE  |          |                    |      |
| pw          | 9.400      | rfl        | 1269.7   |                    |      |
| DECOUPLER   |            | rfp        | 0        |                    |      |
| dn          | H1         | PLOT       |          |                    |      |
| dof         | 0          | wc         | 210      |                    |      |
| dpwr        | 39         | sc         | 0        |                    |      |
| dm          | nny        | vs         | 82344    |                    |      |
| dmm         | ccw        | hzmm       | 131.67   |                    |      |
| dmf         | 11905      | th         | 68       |                    |      |
| pplvl       | 49         |            |          |                    |      |
| pp          | 29.400     |            |          |                    |      |

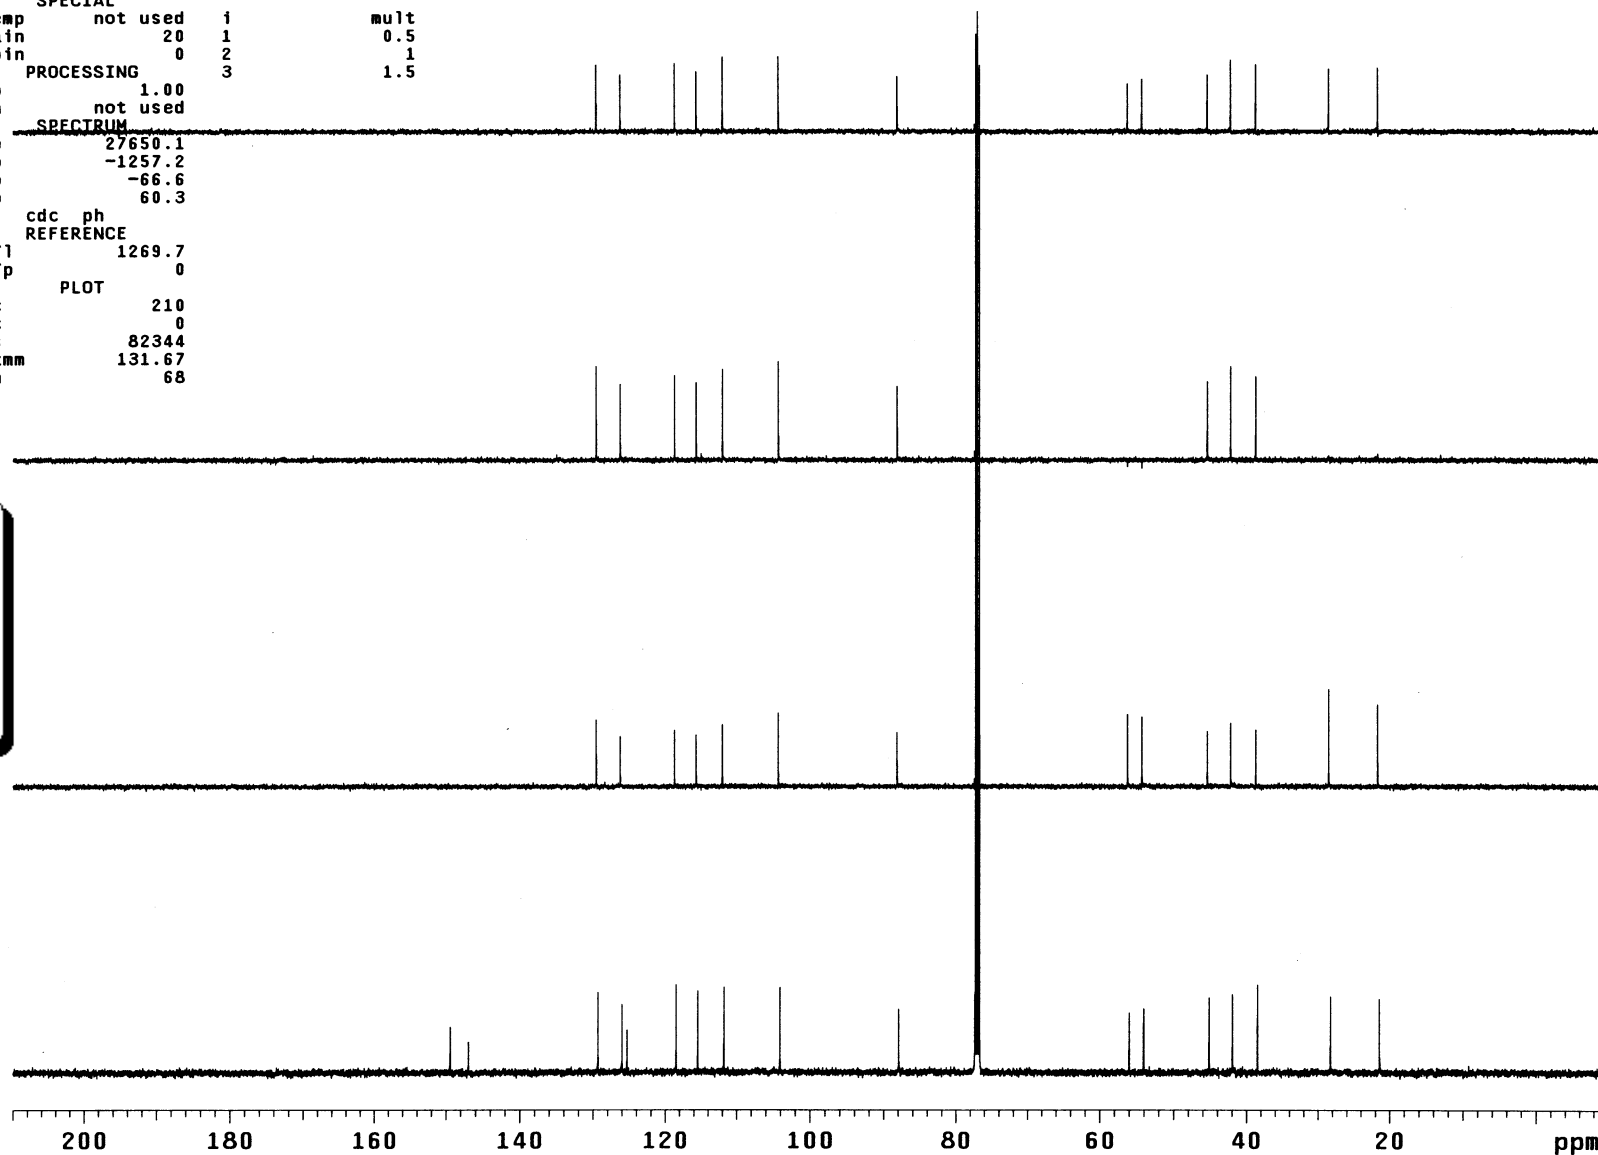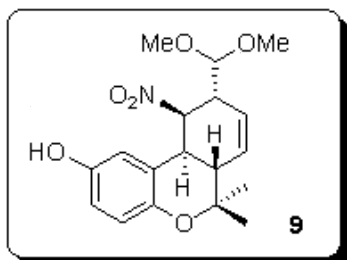

Fig S46. DEPT of compound 9 (CDCl<sub>3</sub>), expanded.

S46

PMK-01-206

exp32 DEPT

| SAMPLE      |            | DEPT       |          | ACQUISITION ARRAYS |      |
|-------------|------------|------------|----------|--------------------|------|
| date        | May 1 2009 | j1xh       | 140.0    | array              | mult |
| solvent     | cdcl3      | mult       | arrayed  | arraydim           | 3    |
| sample      | undefined  | SPECIAL    |          |                    |      |
| ACQUISITION |            | temp       | not used | 1                  | mult |
| sw          | 31446.5    | gain       | 20       | 1                  | 0.5  |
| at          | 1.000      | spin       | 0        | 2                  | 1    |
| np          | 62894      | PROCESSING |          | 3                  | 1.5  |
| bs          | 16         | lb         | 1.00     |                    |      |
| ss          | -4         | fn         | not used |                    |      |
| d1          | 1.000      | SPECTRUM   |          |                    |      |
| nt          | 3000       | wp         | 2513.4   |                    |      |
| ct          | 3000       | sp         | 8168.7   |                    |      |
| TRANSMITTER |            | rp         | -66.6    |                    |      |
| tn          | C13        | lp         | 60.3     |                    |      |
| tof         | 2512.2     | ai         | cdc ph   |                    |      |
| tpwr        | 54         | REFERENCE  |          |                    |      |
| pw          | 9.400      | rfl        | 1269.7   |                    |      |
| DECOUPLER   |            | rfp        | 0        |                    |      |
| dn          | H1         | PLOT       |          |                    |      |
| dof         | 0          | wc         | 210      |                    |      |
| dpwr        | 39         | sc         | 0        |                    |      |
| dm          | nny        | vs         | 82344    |                    |      |
| dmm         | ccw        | hzmm       | 11.97    |                    |      |
| dmf         | 11905      | th         | 68       |                    |      |
| pp1v1       | 49         |            |          |                    |      |
| pp          | 29.400     |            |          |                    |      |

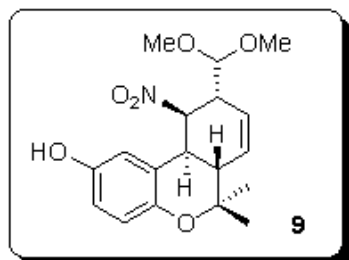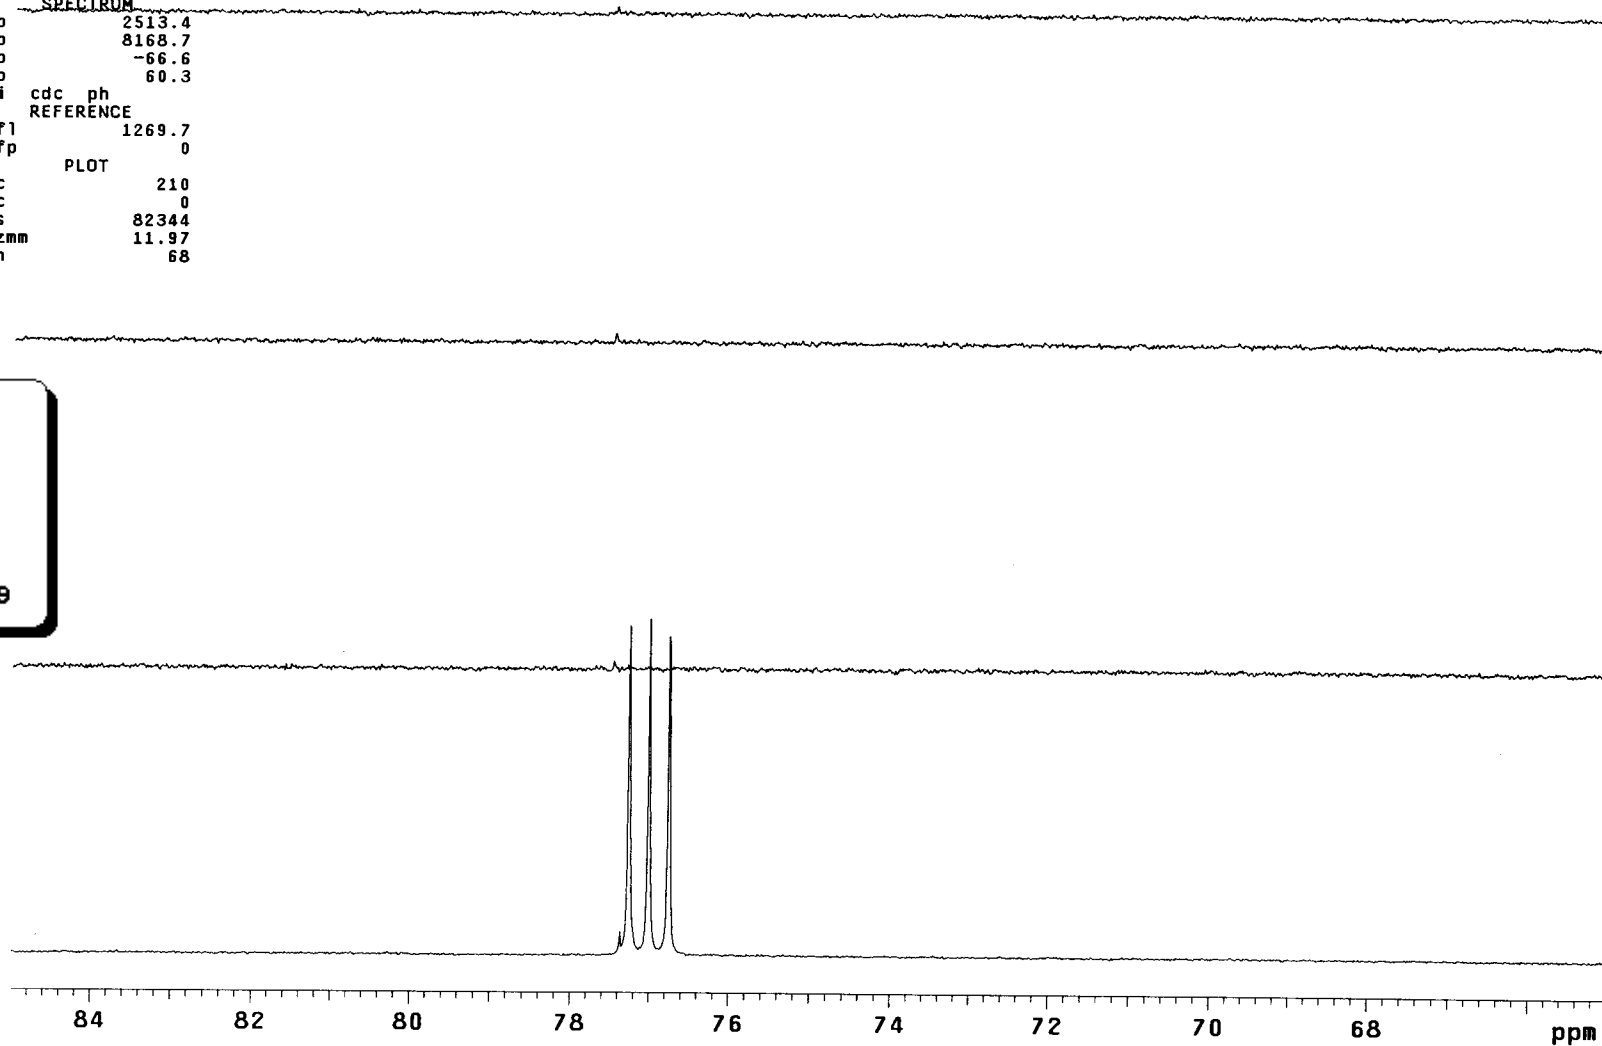

Fig S47. HMQC of compound 9 (CDCl<sub>3</sub>).

S47

PMK-01-206

exp15 gHMQC

| SAMPLE         |            | FLAGS         | ACQUISITION | ARRAYS   |
|----------------|------------|---------------|-------------|----------|
| date           | May 1 2009 | hs            | n           | array    |
| solvent        | cdcl3      | sspul         | y           | arraydim |
| sample         | undefined  | PFGflg        | y           | phase    |
| ACQUISITION    | hsglv1     | 1026          | i           | phase    |
| sw             | 3498.8     | SPECIAL       | 1           | 1        |
| at             | 0.146      | temp          | not used    | 2        |
| np             | 1024       | gain          | 20          |          |
| fb             | 2000       | spin          | 0           |          |
| ss             | 32         |               |             |          |
| d1             | 1.000      | GRADIENTS     |             |          |
| nt             | 16         | gzlv11        | 1026        |          |
| 2D ACQUISITION |            | gt1           | 0.001000    |          |
| sw1            | 21367.5    | gzlv13        | 516         |          |
| ni             | 128        | gt3           | 0.001000    |          |
| phase          | arrayed    | gstab         | 0.000500    |          |
| TRANSMITTER    |            | F2 PROCESSING |             |          |
| tn             | H1         | gf            | 0.068       |          |
| sfrq           | 499.835    | gfs           | not used    |          |
| tof            | -250.0     | fn            | 1024        |          |
| tpwr           | 57         | F1 PROCESSING |             |          |
| pw             | 13.000     | gf1           | 0.006       |          |
| DECOUPLER      |            | gfs1          | not used    |          |
| dn             | C13        | proc1         | lp          |          |
| dof            | -2515.1    | fn1           | 2048        |          |
| dm             | nny        | DISPLAY       |             |          |
| dmm            | ccp        | sp            | 510.0       |          |
| dmf            | 32258      | wp            | 2993.1      |          |
| dpwr           | 35         | sp1           | 1856.3      |          |
| pwxlvl         | 51         | wp1           | 14878.0     |          |
| pw             | 14.700     | rfl           | 1651.3      |          |
| j1xh           | 140.0      | rfp           | 2140.8      |          |
| HMQC           |            | rfl1          | 14374.2     |          |
| nullflg        | y          | rfp1          | 13079.6     |          |
|                |            | PLOT          |             |          |
|                |            | wc            | 150.0       |          |
|                |            | sc            | 6.2         |          |
|                |            | wc2           | 116.2       |          |
|                |            | sc2           | 0           |          |
|                |            | vs            | 227         |          |
|                |            | th            | 5           |          |
|                |            | ai            | cdc         | ph       |

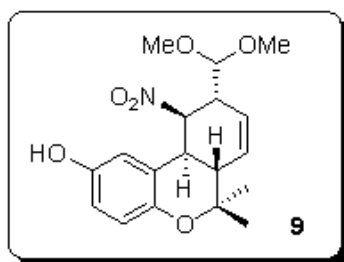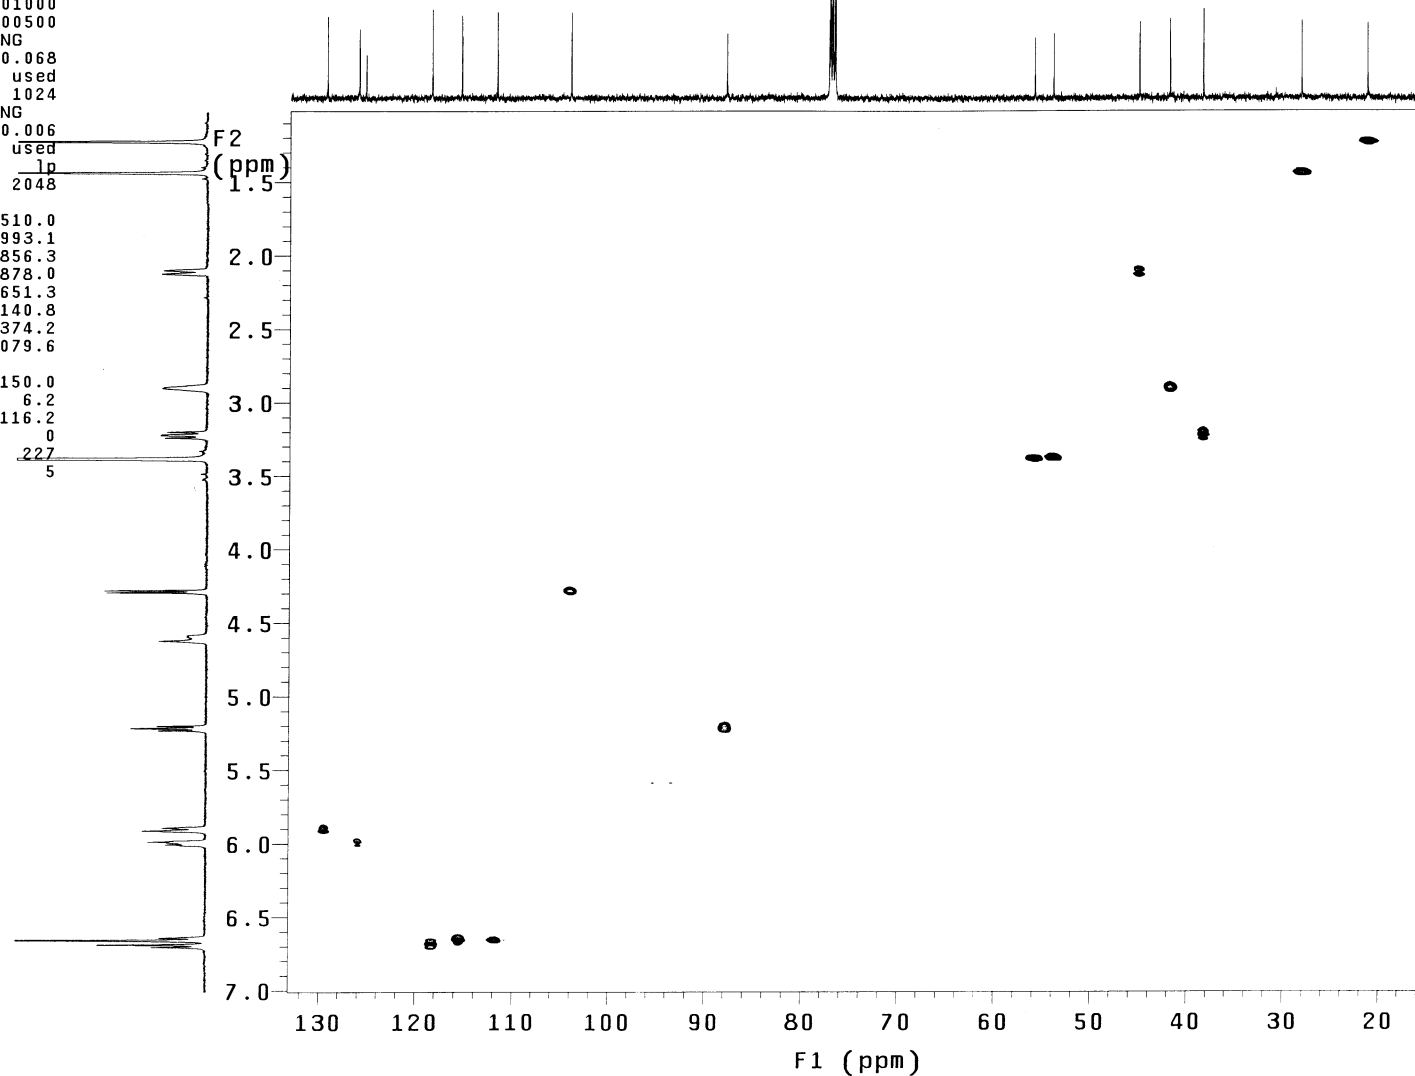

Fig S48. COSY of compound 9 (CDCl<sub>3</sub>).

S48

PMK-01-206

expl4 gCOSY

| SAMPLE         |            | FLAGS         |          |
|----------------|------------|---------------|----------|
| date           | May 1 2009 | hs            | nn       |
| solvent        | cdcl3      | sspul         | n        |
| sample         | undefined  | hsglv1        | 1026     |
| ACQUISITION    |            | SPECIAL       |          |
| sw             | 3498.8     | temp          | not used |
| at             | 0.146      | gain          | 20       |
| np             | 1024       | spin          | 0        |
| fb             | 2000       | F2 PROCESSING |          |
| ss             | 16         | sb            | -0.073   |
| d1             | 1.000      | sbs           | not used |
| nt             | 16         | fn            | 1024     |
| 2D ACQUISITION |            | F1 PROCESSING |          |
| sw1            | 3498.8     | sb1           | -0.037   |
| ni             | 128        | sbs1          | not used |
| TRANSMITTER    |            | proc1         |          |
| tn             | H1         | fn1           | 1024     |
| sfrq           | 499.835    | DISPLAY       |          |
| tof            | -250.0     | sp            | 489.8    |
| tpwr           | 57         | wp            | 3492.0   |
| pw             | 13.000     | sp1           | 493.9    |
| GRADIENTS      |            | wp1           | 3492.0   |
| gzlv11         | 1026       | rfl           | 3135.9   |
| gt1            | 0.001000   | rfp           | 3618.8   |
| gstab          | 0.000500   | rfl1          | 3131.8   |
| DECOUPLER      |            | rfp1          | 3618.8   |
| dn             | C13        | PLOT          |          |
| dm             | nnn        | wc            | 155.0    |
|                |            | sc            | 10.0     |
|                |            | wc2           | 155.0    |
|                |            | sc2           | 0        |
|                |            | vs            | 227      |
|                |            | th            | 6        |
|                |            | ai            | cdc av   |

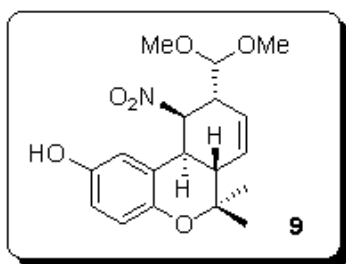F2  
(ppm)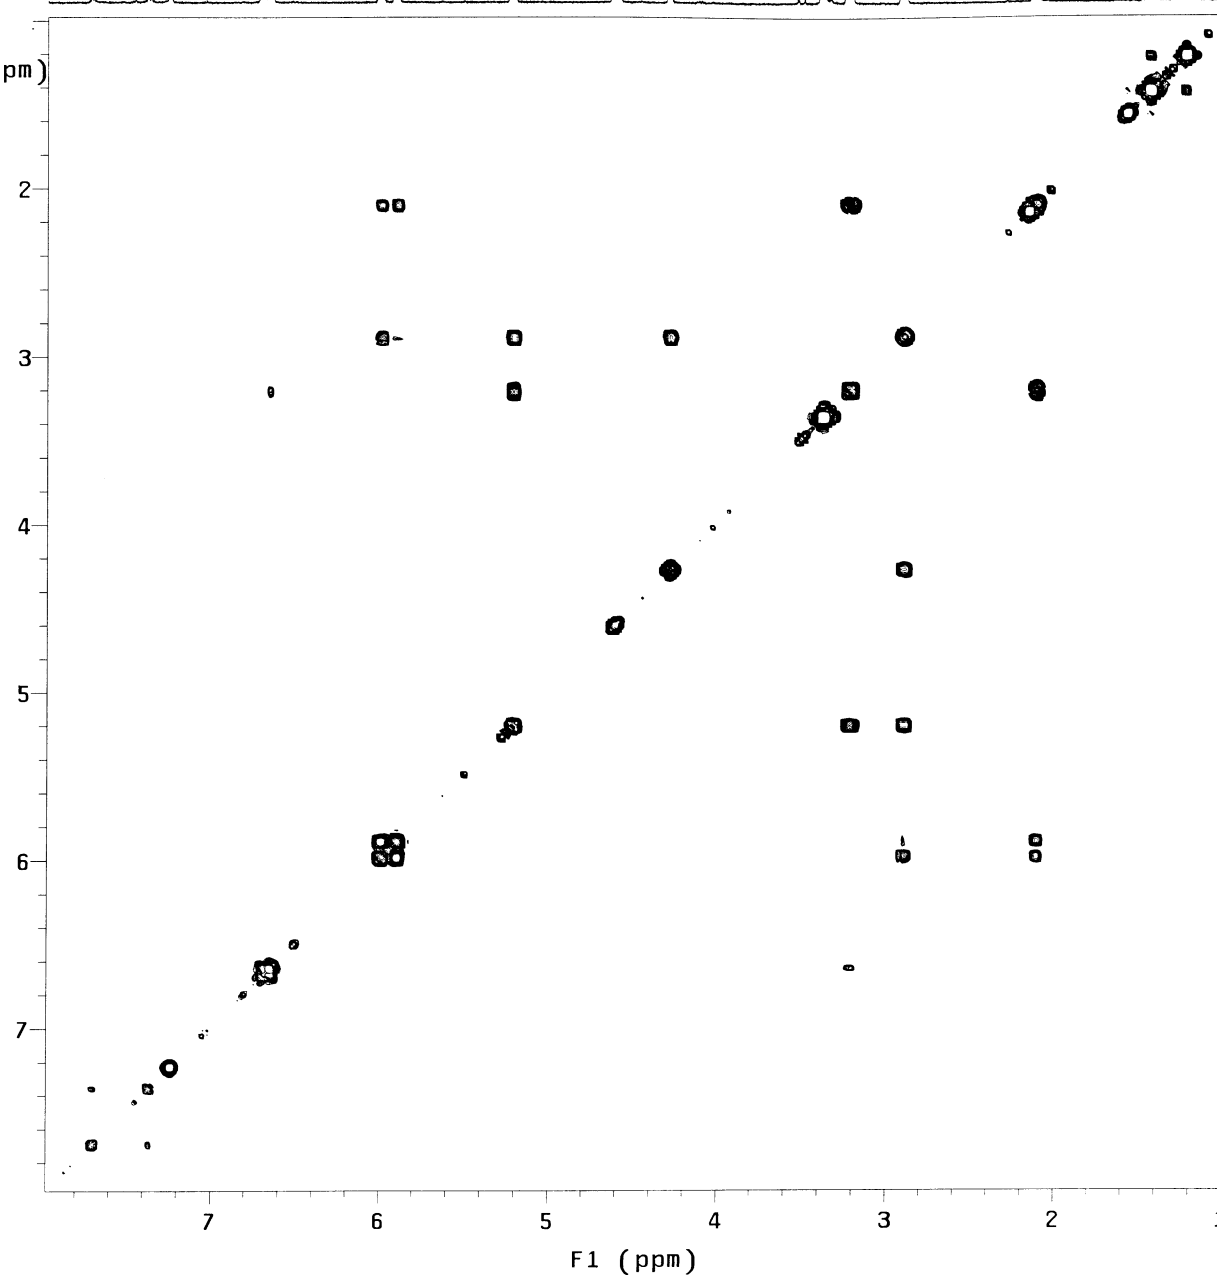

Fig S49. NOESY of compound 9 (CDCl<sub>3</sub>).

S49

PMK-01-206

exp16 NOESY

| SAMPLE         |            | FLAGS         |          |
|----------------|------------|---------------|----------|
| date           | May 1 2009 | hs            | n        |
| solvent        | cdcl3      | sspul         | y        |
| sample         | undefined  | PFGflg        | y        |
| ACQUISITION    |            | hsglvl        | 1026     |
| sw             | 3498.8     | SPECIAL       |          |
| at             | 0.146      | temp          | not used |
| np             | 1024       | gain          | 20       |
| fb             | 2000       | spin          | 0        |
| ss             | 32         | F2 PROCESSING |          |
| d1             | 1.000      | gf            | 0.068    |
| nt             | 8          | gfs           | not used |
| 2D ACQUISITION |            | fn            | 1024     |
| sw1            | 3498.8     | F1 PROCESSING |          |
| ni             | 200        | gf1           | 0.053    |
| TRANSMITTER    |            | gfs1          | not used |
| tn             | H1         | proc1         | lp       |
| sfrq           | 499.835    | fn1           | 1024     |
| tof            | -250.0     | DISPLAY       |          |
| tpwr           | 57         | sp            | 492.5    |
| pw             | 13.000     | wp            | 3492.0   |
| NOESY          |            | sp1           | 505.8    |
| mix            | 0.600      | wp1           | 3492.0   |
| PRESATURATION  |            | rfl           | 3133.1   |
| satmode        | nnnn       | rfp           | 3618.8   |
| satpwr         | 0          | rfl1          | 3129.8   |
| satdly         | 0          | rfp1          | 3628.8   |
| satfrq         | 0          | PLOT          |          |
| DECOUPLER      |            | wc            | 155.0    |
| dn             | C13        | sc            | 10.0     |
| dm             | nnn        | wc2           | 155.0    |
|                |            | sc2           | 0        |
|                |            | vs            | 227      |
|                |            | th            | 1        |
|                |            | ai            | ph       |

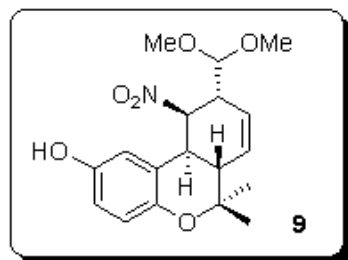F2  
(ppm)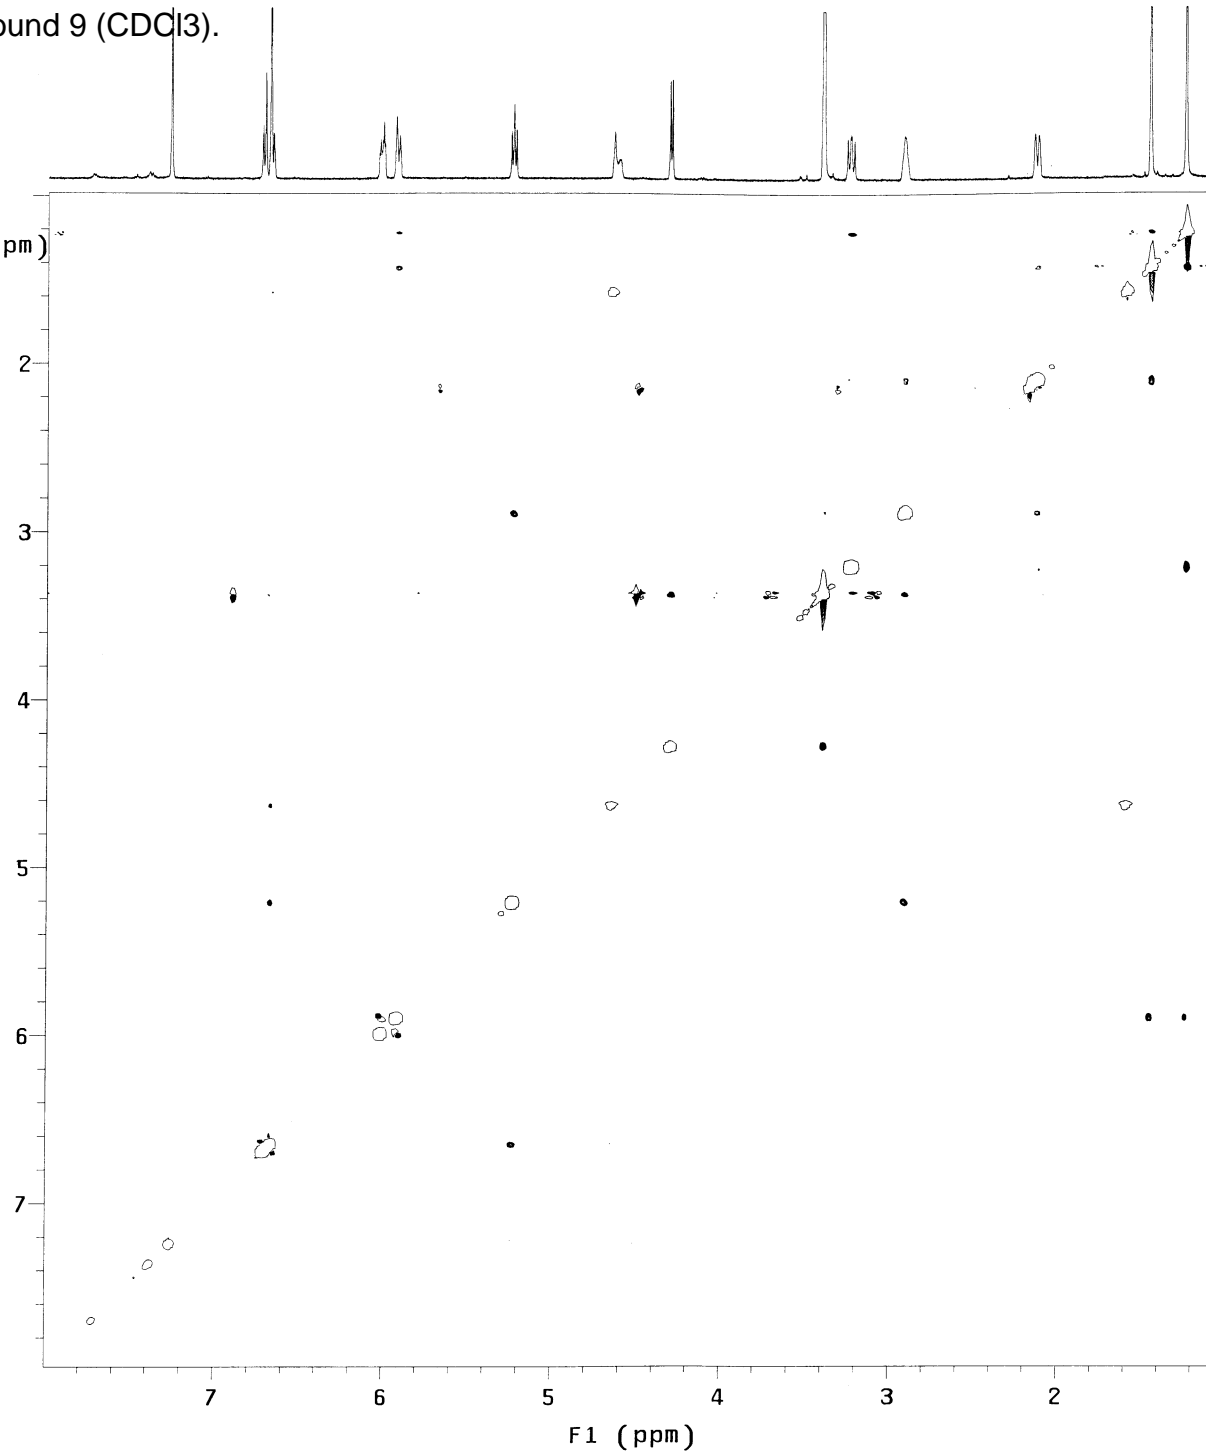

Fig S50. <sup>1</sup>H NMR of compound 10 (500 MHz, CDCl<sub>3</sub>).

S50

PMK-01-207

exp46 s2pu1

| SAMPLE      |            | DEC. & VT |          |
|-------------|------------|-----------|----------|
| date        | Apr 8 2009 | dfrq      | 125.695  |
| solvent     | cdcl3      | dn        | C13      |
| file        | exp        | dpwr      | 30       |
| ACQUISITION |            |           |          |
| sfrq        | 499.836    | dof       | 0        |
| tn          | H1         | dm        | nnn      |
| at          | 3.000      | dmm       | c        |
| np          | 48000      | dmf       | 200      |
| sw          | 8000.0     | dseq      |          |
| fb          | 4000       | dres      | 1.0      |
| bs          | 4          | homo      | n        |
| PROCESSING  |            |           |          |
| tpwr        | 57         | wtfile    |          |
| pw          | 4.8        | proc      | ft       |
| d1          | 1.000      | fn        | not used |
| tof         | 499.7      | math      | f        |
| nt          | 4          |           |          |
| ct          | 4          | werr      | react    |
| alock       | y          | wexp      | procplot |
| gain        | not used   | wbs       |          |
| FLAGS       |            | wft       |          |
| il          | n          |           |          |
| in          | n          |           |          |
| dp          | y          |           |          |
| hs          | nn         |           |          |
| DISPLAY     |            |           |          |
| sp          | -250.1     |           |          |
| wp          | 5498.0     |           |          |
| vs          | 142        |           |          |
| sc          | 0          |           |          |
| wc          | 210        |           |          |
| hzmm        | 26.18      |           |          |
| is          | 109.02     |           |          |
| rfl         | 4633.1     |           |          |
| rfp         | 3628.8     |           |          |
| th          | 2          |           |          |
| ins         | 100.000    |           |          |
| nm          | ph         |           |          |

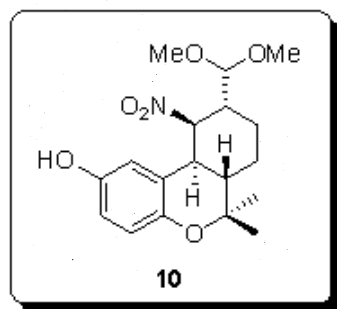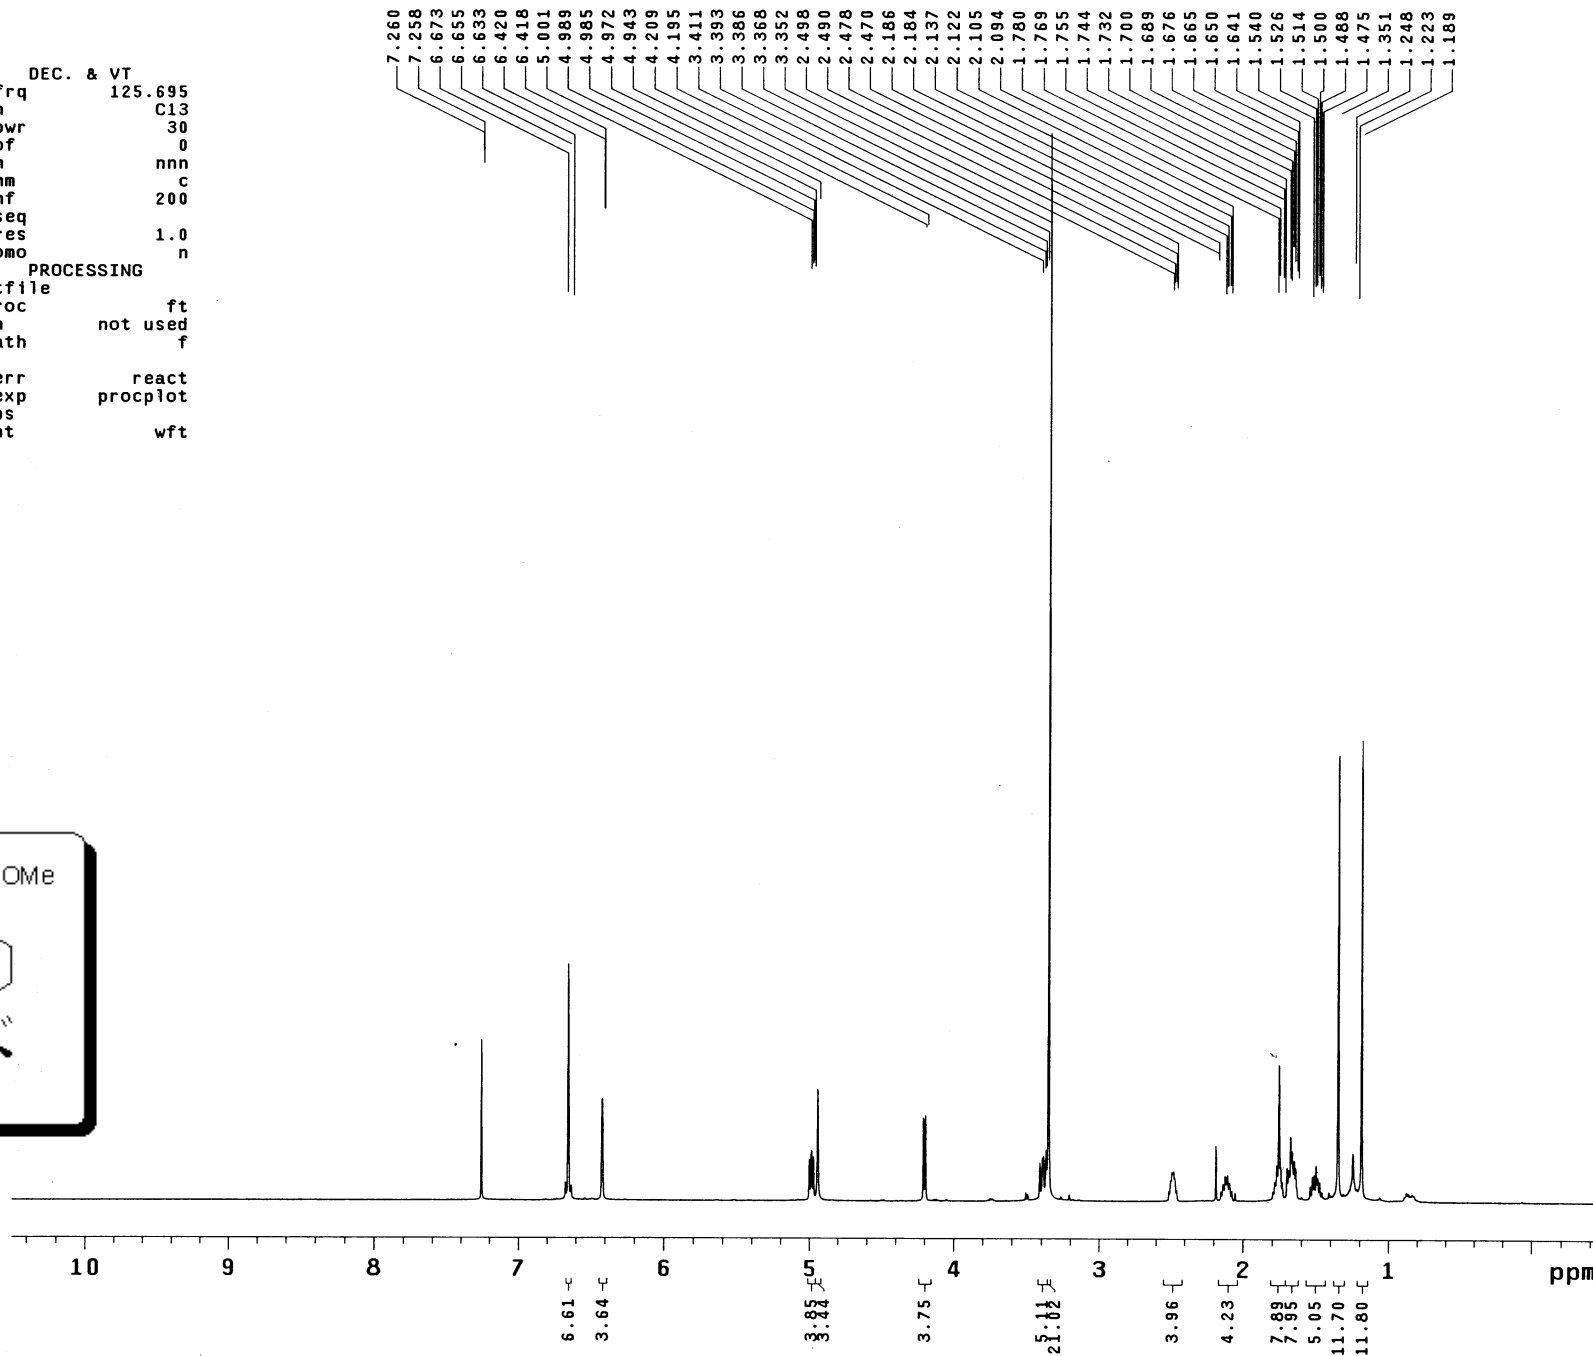

Fig S51. <sup>13</sup>C NMR of compound 10 (125 MHz, CDCl<sub>3</sub>).

S51

PMK-01-207

exp48 s2pu1

SAMPLE DEC. & VT  
date Apr 8 2009 dfrq 499.836  
solvent cdcl3 dn H1  
file exp dpwr 39  
ACQUISITION dof 0  
sfrq 125.698 dm yyy  
tn C13 dmm w  
at 1.000 dmf 11905  
np 62894 dseq  
sw 31446.5 dres 1.0  
fb 17000 homo n  
bs 16  
ss 2 PROCESSING  
tpwr 54 lb 1.00  
pw 4.0 wtfile  
d1 1.000 fn not used  
tof 2512.2 math f  
nt 5000  
ct 5000 werr react  
alock y wexp procplot  
gain not used wbs testsn  
wnt  
FLAGS  
il n  
in n  
dp y  
hs nn  
DISPLAY  
sp -1256.9  
wp 27650.1  
vs 125  
sc 0  
wc 210  
hzmm 131.67  
is 500.00  
rfl 10983.4  
rfp 9677.6  
th 9  
ins 100.000  
nm ph

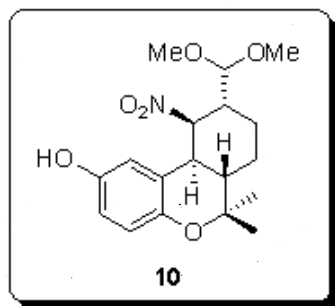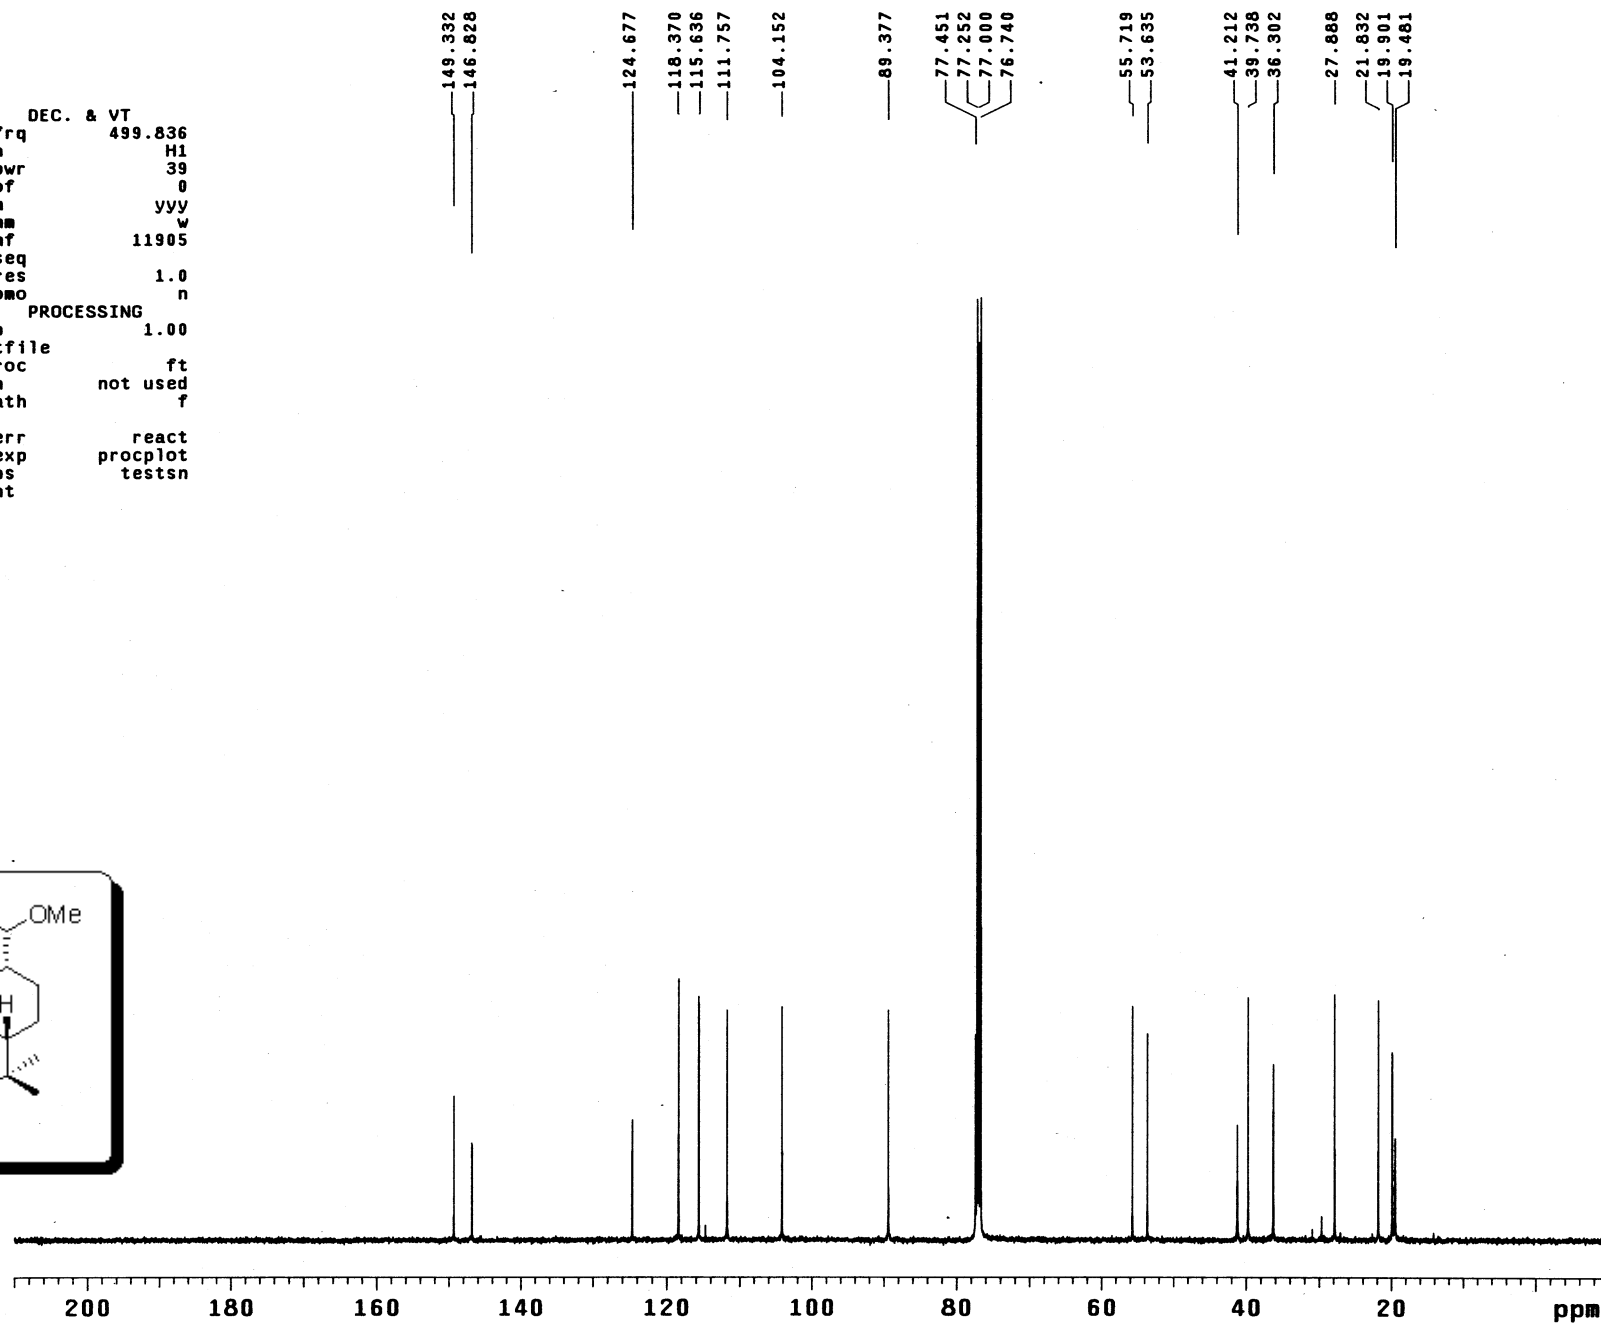

Fig S52. <sup>13</sup>C NMR of compound 10 (125 MHz, CDCl<sub>3</sub>), expanded.

S52

PMK-01-207

exp32 s2pu1

```

SAMPLE          DEC. & VT
date Apr 8 2009  dfrq      499.836
solvent cdc13      dn       H1
file /export/home/~ dpwr      39
vnmr1/vnmrsys/data~ dof       0
/PMK/PMK-01-207/C.~ dm        yyy
                  fid        w
ACQUISITION      dmf      11905
sfrq      125.698  dseq
tn         C13      dres      1.0
at         1.000    homo      n
np         62894
sw         31446.5  lb        1.00
fb         17000    wtfile
bs         16       proc      ft
ss         2        fn        not used
tpwr       54       math      f
pw         4.0
d1         1.000    werr      react
tof        2512.2   wexp      procplot
nt         5000     wbs       testsn
ct         5000     wnt
alock      y
gain       not used
          FLAGS
fl         n
in         n
dp         y
hs         nn
          DISPLAY
sp         8169.0
wp         2513.4
vs         94
sc         0
wc         210
hzmm       11.97
is         500.00
rfl        10983.4
rfp        9677.6
th         12
ins        100.000
nm         ph
    
```

77.451  
77.252  
77.000  
76.740

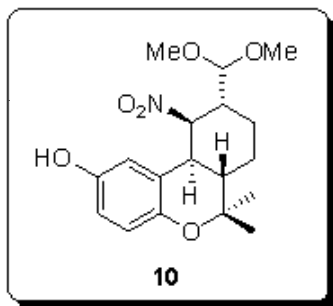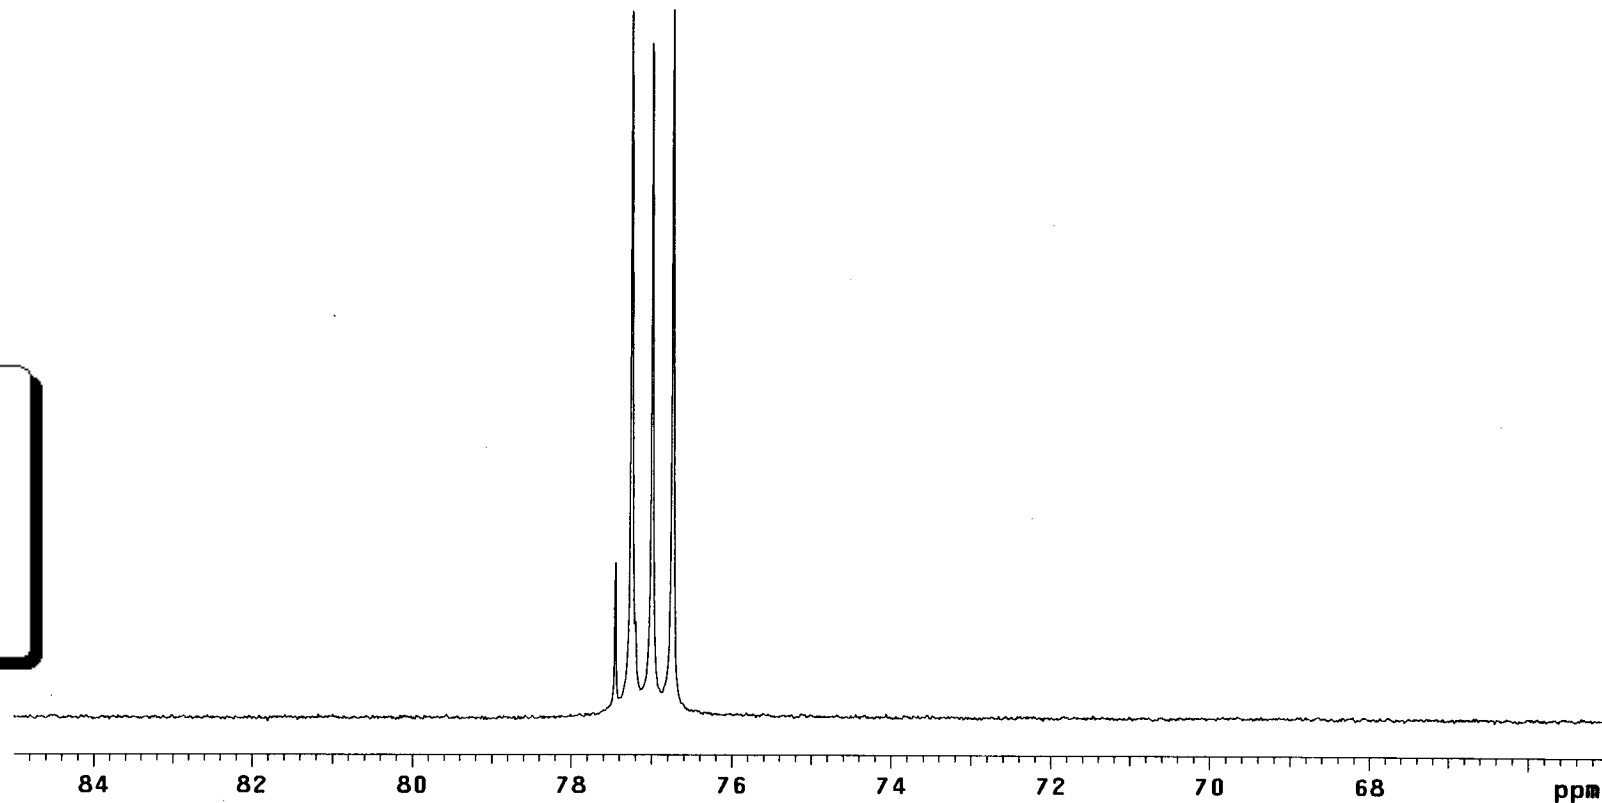

Fig S53. DEPT of compound 10 (CDCl<sub>3</sub>).

S53

PMK-01-207

exp47 DEPT

| SAMPLE      |            | DEPT          | ACQUISITION ARRAYS |      |
|-------------|------------|---------------|--------------------|------|
| date        | Apr 8 2009 | j1xh 140.0    | array              | mult |
| solvent     | cdcl3      | mult          | arraydim           | 3    |
| sample      | undefined  | SPECIAL       |                    |      |
| ACQUISITION |            | temp not used | i                  | mult |
| sw          | 31446.5    | gain 54       | 1                  | 0.5  |
| at          | 1.000      | spin 0        | 2                  | 1    |
| np          | 62894      | PROCESSING    | 3                  | 1.5  |
| bs          | 16         | lb 1.00       |                    |      |
| ss          | -4         | fn not used   |                    |      |
| d1          | 1.000      | SPECTRUM      |                    |      |
| nt          | 1000       | wp 27650.1    |                    |      |
| ct          | 1000       | sp -1257.2    |                    |      |
| TRANSMITTER |            | rp -52.7      |                    |      |
| tn          | C13        | lp 41.6       |                    |      |
| tof         | 2512.2     | ai cdc ph     |                    |      |
| tpwr        | 54         | REFERENCE     |                    |      |
| pw          | 9.400      | rfl 1269.7    |                    |      |
| DECOUPLER   |            | rfl 0         |                    |      |
| dn          | H1         | PLOT          |                    |      |
| dof         | 0          | wc 210        |                    |      |
| dpwr        | 39         | sc 0          |                    |      |
| dm          | nny        | vs 175        |                    |      |
| dmm         | ccw        | hzmm 131.67   |                    |      |
| dmf         | 11905      | th 68         |                    |      |
| pp1v1       | 49         |               |                    |      |
| pp          | 29.400     |               |                    |      |

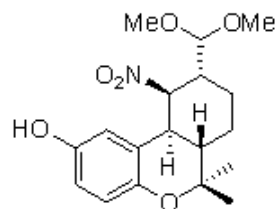

10

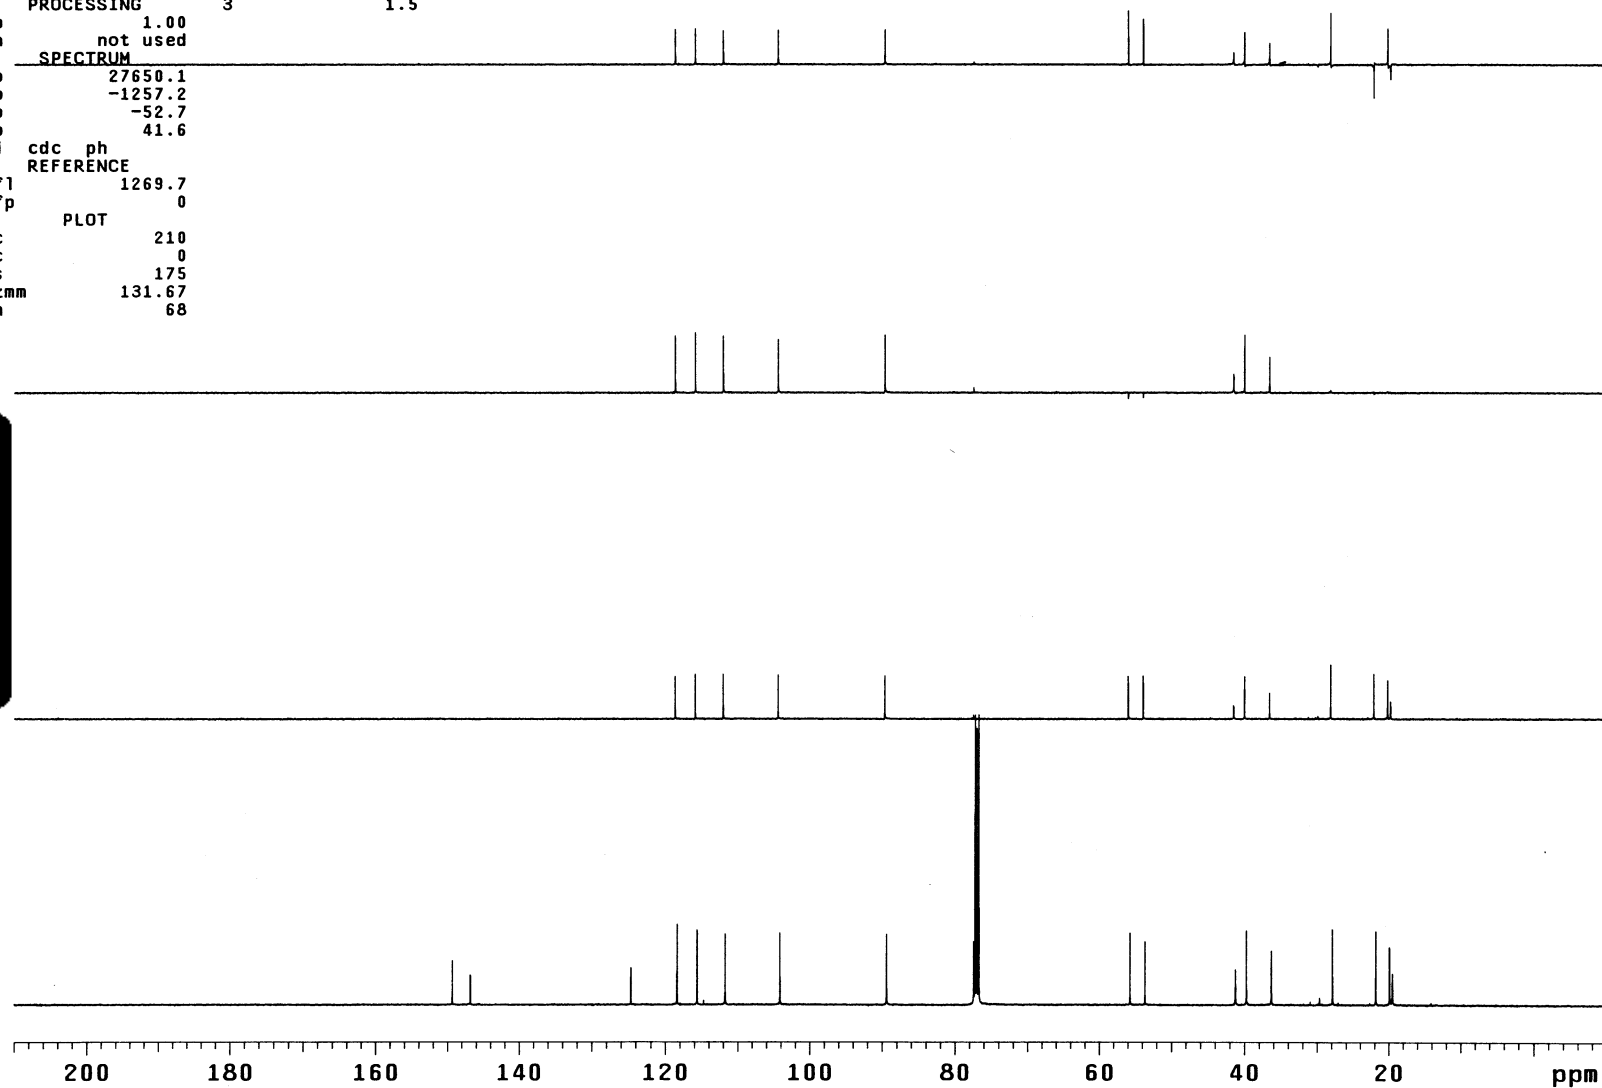

Fig S54. DEPT of compound 10 (CDCl<sub>3</sub>), expanded.

S54

PMK-01-207

exp33 DEPT

| SAMPLE      |            | DEPT       |          | ACQUISITION ARRAYS |      |
|-------------|------------|------------|----------|--------------------|------|
| date        | Apr 8 2009 | j1xh       | 140.0    | array              | mult |
| solvent     | cdcl3      | mult       | arrayed  | arraydim           | 3    |
| sample      | undefined  | SPECIAL    |          |                    |      |
| ACQUISITION |            | temp       | not used | i                  | mult |
| sw          | 31446.5    | gain       | 54       | 1                  | 0.5  |
| at          | 1.000      | spin       | 0        | 2                  | 1    |
| np          | 62894      | PROCESSING |          | 3                  | 1.5  |
| bs          | 16         | lb         | 1.00     |                    |      |
| ss          | -4         | fn         | not used |                    |      |
| d1          | 1.000      | SPECTRUM   |          |                    |      |
| nt          | 1000       | wp         | 2513.4   |                    |      |
| ct          | 1000       | sp         | 8168.7   |                    |      |
| TRANSMITTER |            | rp         | -52.5    |                    |      |
| tn          | C13        | lp         | 36.5     |                    |      |
| tof         | 2512.2     | ai         | cdc ph   |                    |      |
| tpwr        | 54         | REFERENCE  |          |                    |      |
| pw          | 9.400      | rfl        | 1269.7   |                    |      |
| DECOUPLER   |            | rtp        | 0        |                    |      |
| dn          | H1         | PLOT       |          |                    |      |
| dof         | 0          | wc         | 210      |                    |      |
| dpwr        | 39         | sc         | 0        |                    |      |
| dm          | nny        | vs         | 230      |                    |      |
| dmm         | ccw        | hzmm       | 11.97    |                    |      |
| dmf         | 11905      | th         | 68       |                    |      |
| pp1v1       | 49         |            |          |                    |      |
| pp          | 29.400     |            |          |                    |      |

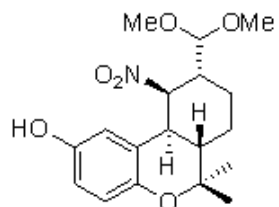

10

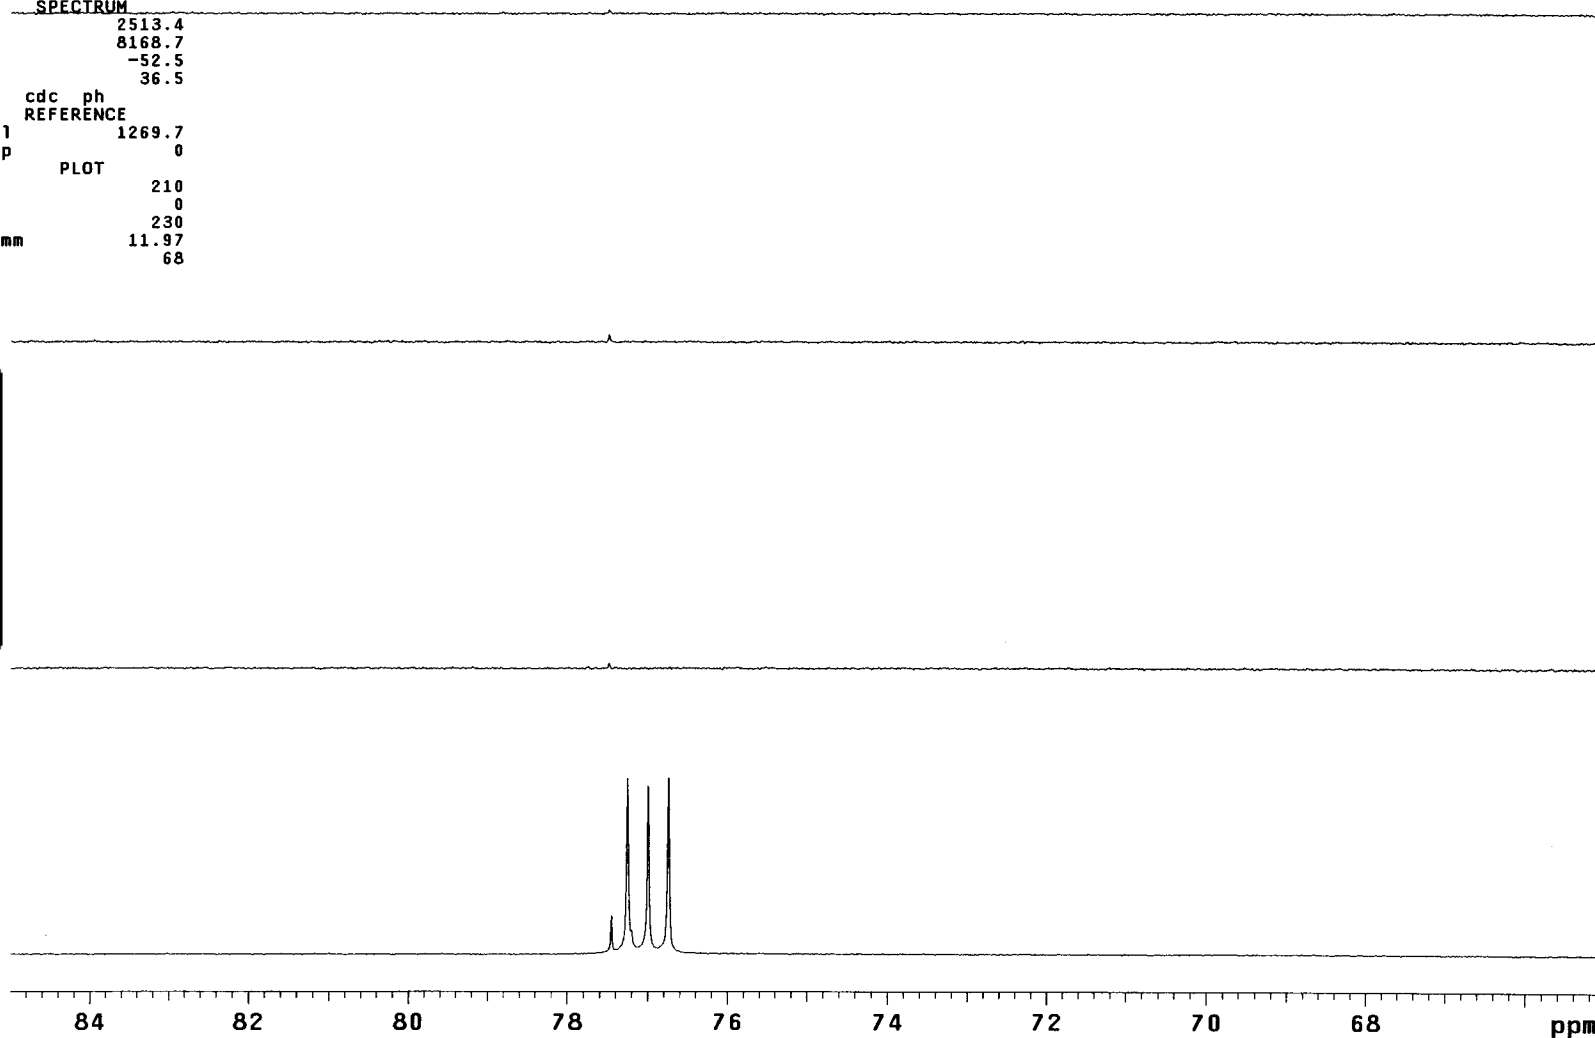

Fig S55. HMQC compound 10 (CDCl<sub>3</sub>).

S55

PMK-01-207

exp33 gHMQC

| SAMPLE         |             | FLAGS         | ACQUISITION | ARRAYS |
|----------------|-------------|---------------|-------------|--------|
| date           | Apr 13 2009 | hs            | n           | phase  |
| solvent        | cdc13       | sspul         | y           | 256    |
| sample         | undefined   | PFGflg        | y           |        |
| ACQUISITION    |             | hsglv1        | 1026        | phase  |
| sw             | 3748.8      | SPECIAL       | 1           | 1      |
| at             | 0.137       | temp          | 21.0        | 2      |
| np             | 1024        | gain          | 54          |        |
| fb             | 2000        | spin          | 0           |        |
| ss             | 32          | GRADIENTS     |             |        |
| d1             | 1.000       | gzlv11        | 1026        |        |
| nt             | 16          | gt1           | 0.001000    |        |
| 2D ACQUISITION |             | gzlv13        | 516         |        |
| sw1            | 21367.5     | gt3           | 0.001000    |        |
| n1             | 128         | gstab         | 0.000500    |        |
| phase          | arrayed     | F2 PROCESSING |             |        |
| TRANSMITTER    |             | gf            | 0.063       |        |
| tn             | H1          | gfs           | not used    |        |
| sfrq           | 499.835     | fn            | 1024        |        |
| tof            | -375.0      | F1 PROCESSING |             |        |
| tpwr           | 57          | gf1           | 0.006       |        |
| pw             | 13.000      | gfs1          | not used    |        |
| DECOUPLER      |             | proc1         | 1p          |        |
| dn             | C13         | fn1           | 2048        |        |
| do1            | -2515.1     | DISPLAY       |             |        |
| dm             | nny         | sp            | 443.3       |        |
| dmm            | ccp         | wp            | 3067.9      |        |
| dmf            | 32258       | sp1           | 2026.7      |        |
| dpwr           | 35          | wp1           | 13667.7     |        |
| pwxlvl         | 51          | rfl           | 2959.7      |        |
| pw             | 14.700      | rfl           | 3197.9      |        |
| HMQC           |             | rfl1          | 15357.9     |        |
| j1xh           | 140.0       | rfl1          | 14046.0     |        |
| nullflg        | y           | PLOT          |             |        |
|                |             | wc            | 150.0       |        |
|                |             | sc            | 6.2         |        |
|                |             | wc2           | 116.2       |        |
|                |             | sc2           | 0           |        |
|                |             | vs            | 453         |        |
|                |             | th            | 4           |        |
|                |             | al            | cdc ph      |        |

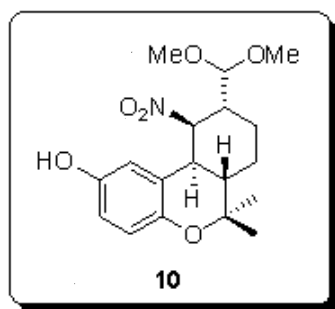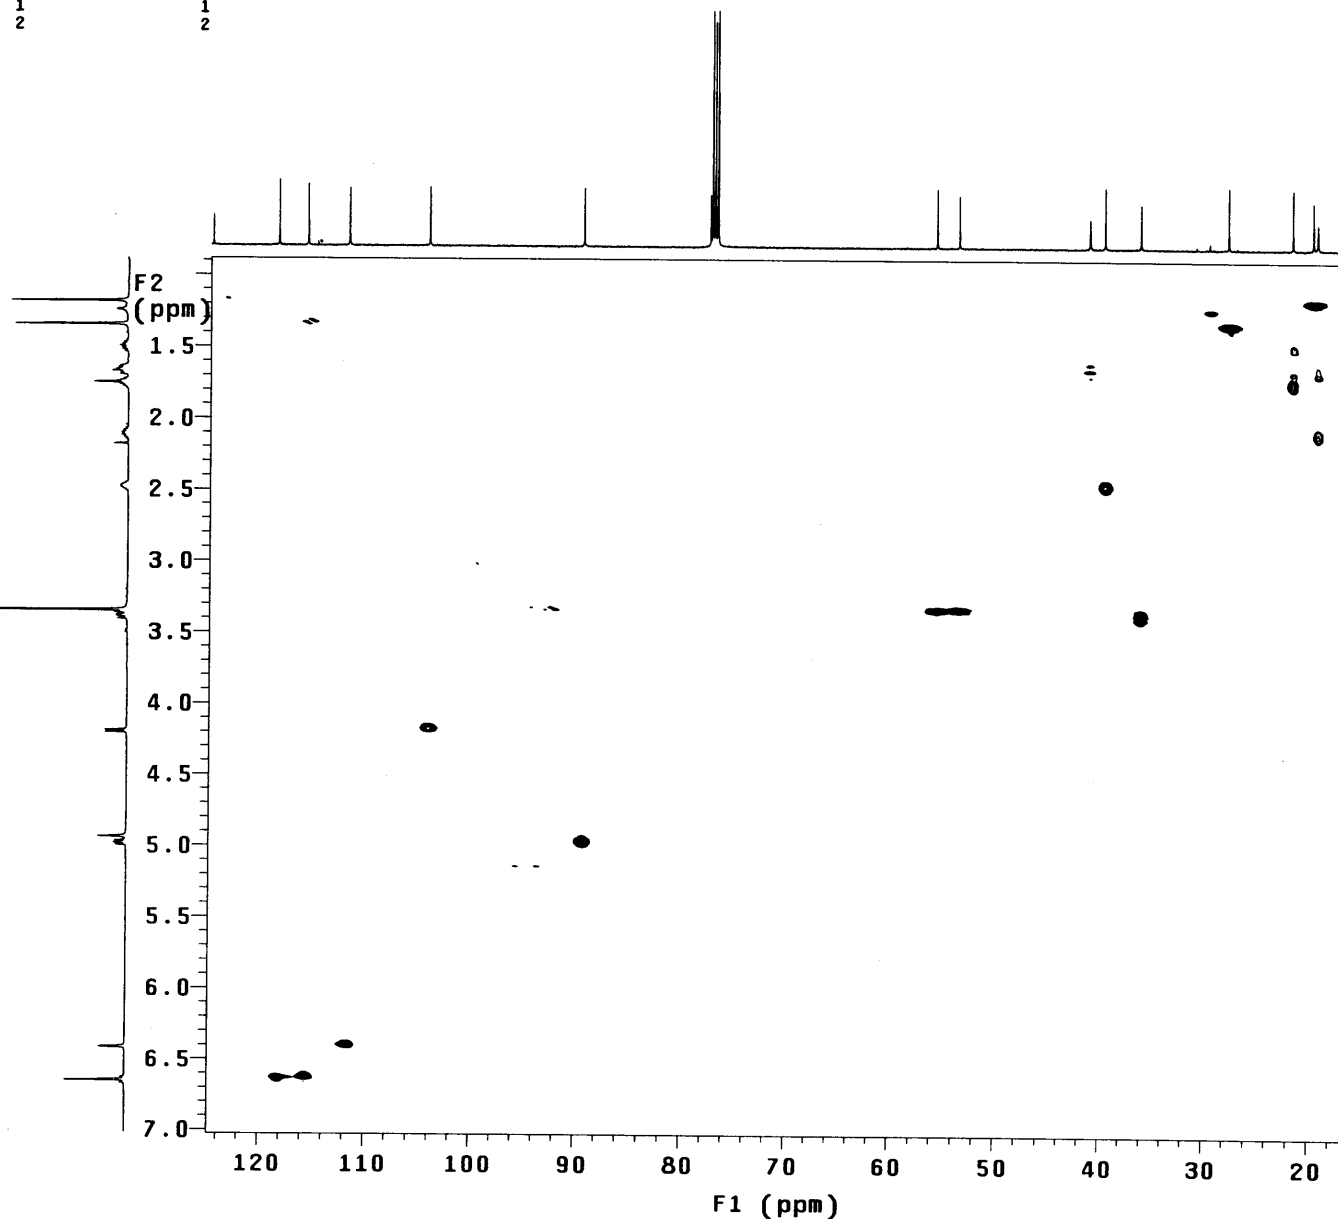

Fig S56. COSY of compound 10 (CDCl<sub>3</sub>).

S56

PMK-01-207

exp41 gCOSY

| SAMPLE         |             | FLAGS         |          |
|----------------|-------------|---------------|----------|
| date           | Apr 13 2009 | hs            | nn       |
| solvent        | cdcl3       | sspul         | n        |
| sample         | undefined   | hsglv1        | 1026     |
| ACQUISITION    |             | SPECIAL       |          |
| sw             | 3748.8      | temp          | 21.0     |
| at             | 0.137       | gain          | 34       |
| np             | 1024        | spin          | 0        |
| fb             | 2000        | F2 PROCESSING |          |
| ss             | 16          | sb            | -0.068   |
| d1             | 1.000       | sbs           | not used |
| nt             | 16          | fn            | 1024     |
| 2D ACQUISITION |             | F1 PROCESSING |          |
| sw1            | 3748.8      | sb1           | -0.034   |
| ni             | 128         | sbs1          | not used |
| TRANSMITTER    |             | proc1         |          |
| tn             | H1          | lp            |          |
| sfrq           | 499.835     | fn1           | 1024     |
| tof            | -375.0      | DISPLAY       |          |
| tpwr           | 57          | sp            | 245.6    |
| pw             | 13.000      | wp            | 3741.5   |
| GRADIENTS      |             | sp1           | 247.8    |
| gzlv11         | 1026        | wp1           | 3741.5   |
| gt1            | 0.001000    | rfl           | 3380.5   |
| gstab          | 0.000500    | rfp           | 3618.8   |
| DECOUPLER      |             | rfl1          | 3378.3   |
| dn             | C13         | rfp1          | 3618.8   |
| dm             | nnn         | PLOT          |          |
|                |             | wc            | 155.0    |
|                |             | sc            | 10.0     |
|                |             | wc2           | 155.0    |
|                |             | sc2           | 0        |
|                |             | vs            | 453      |
|                |             | th            | 4        |
|                |             | ai            | cdc av   |

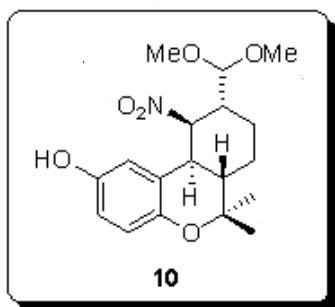F2  
(ppm)

1

2

3

4

5

6

7

F1 (ppm)

7

6

5

4

3

2

1

Fig S57. NOESY of compound 10 (CDCl<sub>3</sub>).

S57

PMK-01-207

exp43 NOESY

| SAMPLE         |             | FLAGS         |          |
|----------------|-------------|---------------|----------|
| date           | Apr 13 2009 | hs            | n        |
| solvent        | cdc13       | sspul         | y        |
| sample         | undefined   | PFGflg        | y        |
| ACQUISITION    |             | hsglv1        | 1026     |
| sw             | 3748.8      | SPECIAL       |          |
| at             | 0.137       | temp          | 21.0     |
| np             | 1024        | gain          | 34       |
| fb             | 2000        | spin          | 0        |
| ss             | 32          | F2 PROCESSING |          |
| d1             | 1.000       | gf            | 0.063    |
| nt             | 8           | gfs           | not used |
| 2D ACQUISITION |             | fn            | 1024     |
| sw1            | 3748.8      | F1 PROCESSING |          |
| ni             | 200         | gf1           | 0.049    |
| TRANSMITTER    |             | gfs1          | not used |
| tn             | H1          | proc1         | lp       |
| sfrq           | 499.835     | fn1           | 1024     |
| tof            | -375.0      | DISPLAY       |          |
| tpwr           | 57          | sp            | 244.9    |
| pw             | 13.000      | wp            | 3741.5   |
| NOESY          |             | sp1           | 247.1    |
| mix            | 0.600       | wp1           | 3741.5   |
| PRESATURATION  |             | rfl           | 3381.2   |
| satmode        | nnnn        | rfp           | 3618.8   |
| satpwr         | 0           | rfl1          | 3379.0   |
| satdly         | 0           | rfp1          | 3618.8   |
| satfrq         | 0           | PLOT          |          |
| DECOUPLER      |             | wc            | 155.0    |
| dn             | C13         | sc            | 10.0     |
| dm             | nnn         | wc2           | 155.0    |
|                |             | sc2           | 0        |
|                |             | vs            | 453      |
|                |             | th            | 1        |
|                |             | ai            | ph       |

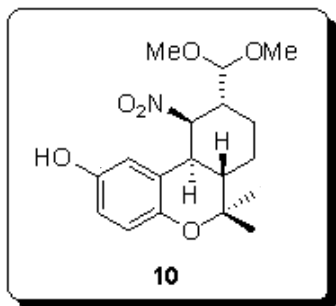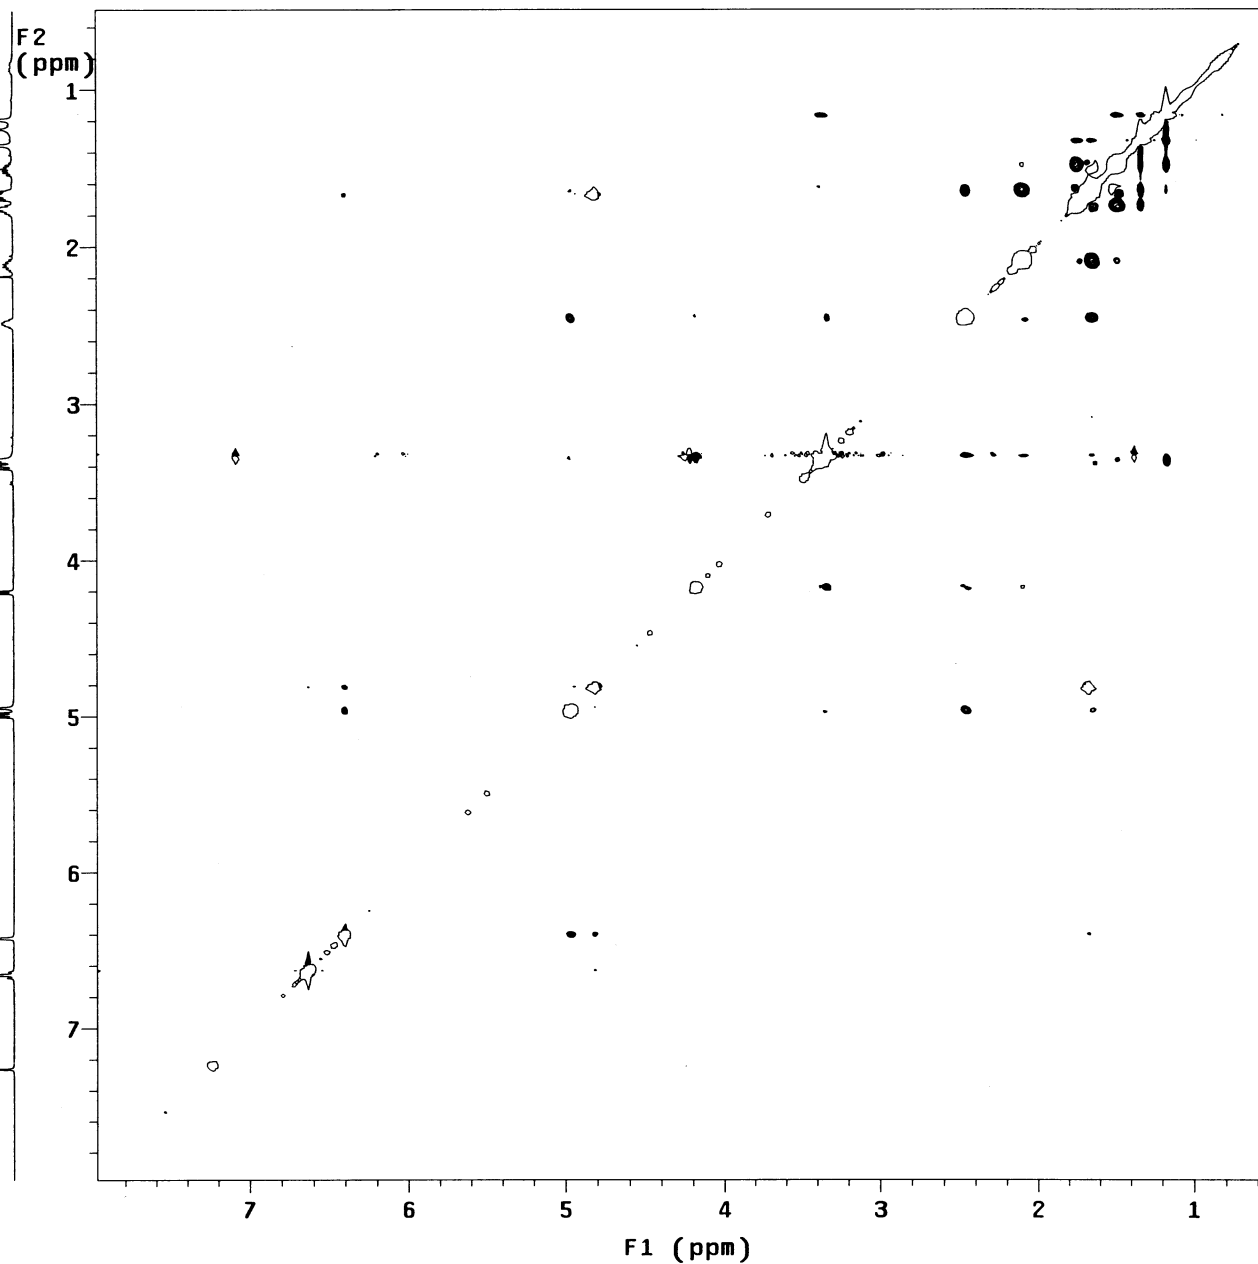

Fig S58. <sup>1</sup>H NMR of compound 11 (500 MHz, CD<sub>3</sub>CN).

PMK-01-255

exp33 s2pul

SAMPLE DEC. 8 9.861 9.857  
 date Sep 15 2009 dfrq 125.696  
 solvent ch3cn dn C13  
 file exp dpwr 30  
 ACQUISITION dof 0  
 sfrq 499.839 dm nnn  
 tn H1 dmm c  
 at 3.000 dmf 200  
 np 48000 dseq  
 sw 8000.0 dres 1.0  
 fb 4000 homo n  
 bs 4  
 PROCESSING  
 tpwr 57 wtfile  
 pw 4.8 proc ft  
 d1 1.000 fn not used f  
 tof 499.7 math  
 nt 4  
 ct 4 werr  
 alock y wexp  
 gain not used wbs  
 wnt wft  
 FLAGS  
 il n  
 in n  
 dp y  
 hs nn  
 DISPLAY  
 sp -250.0  
 wp 5498.0  
 vs 873  
 sc 0  
 wc 210  
 hzmm 26.18  
 is 230.40  
 rfl 1982.7  
 rfp 969.7  
 th 7  
 ins 100.000  
 nm ph

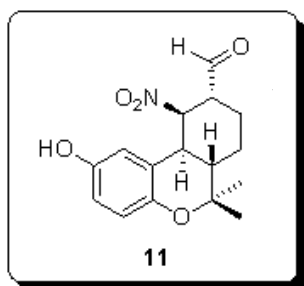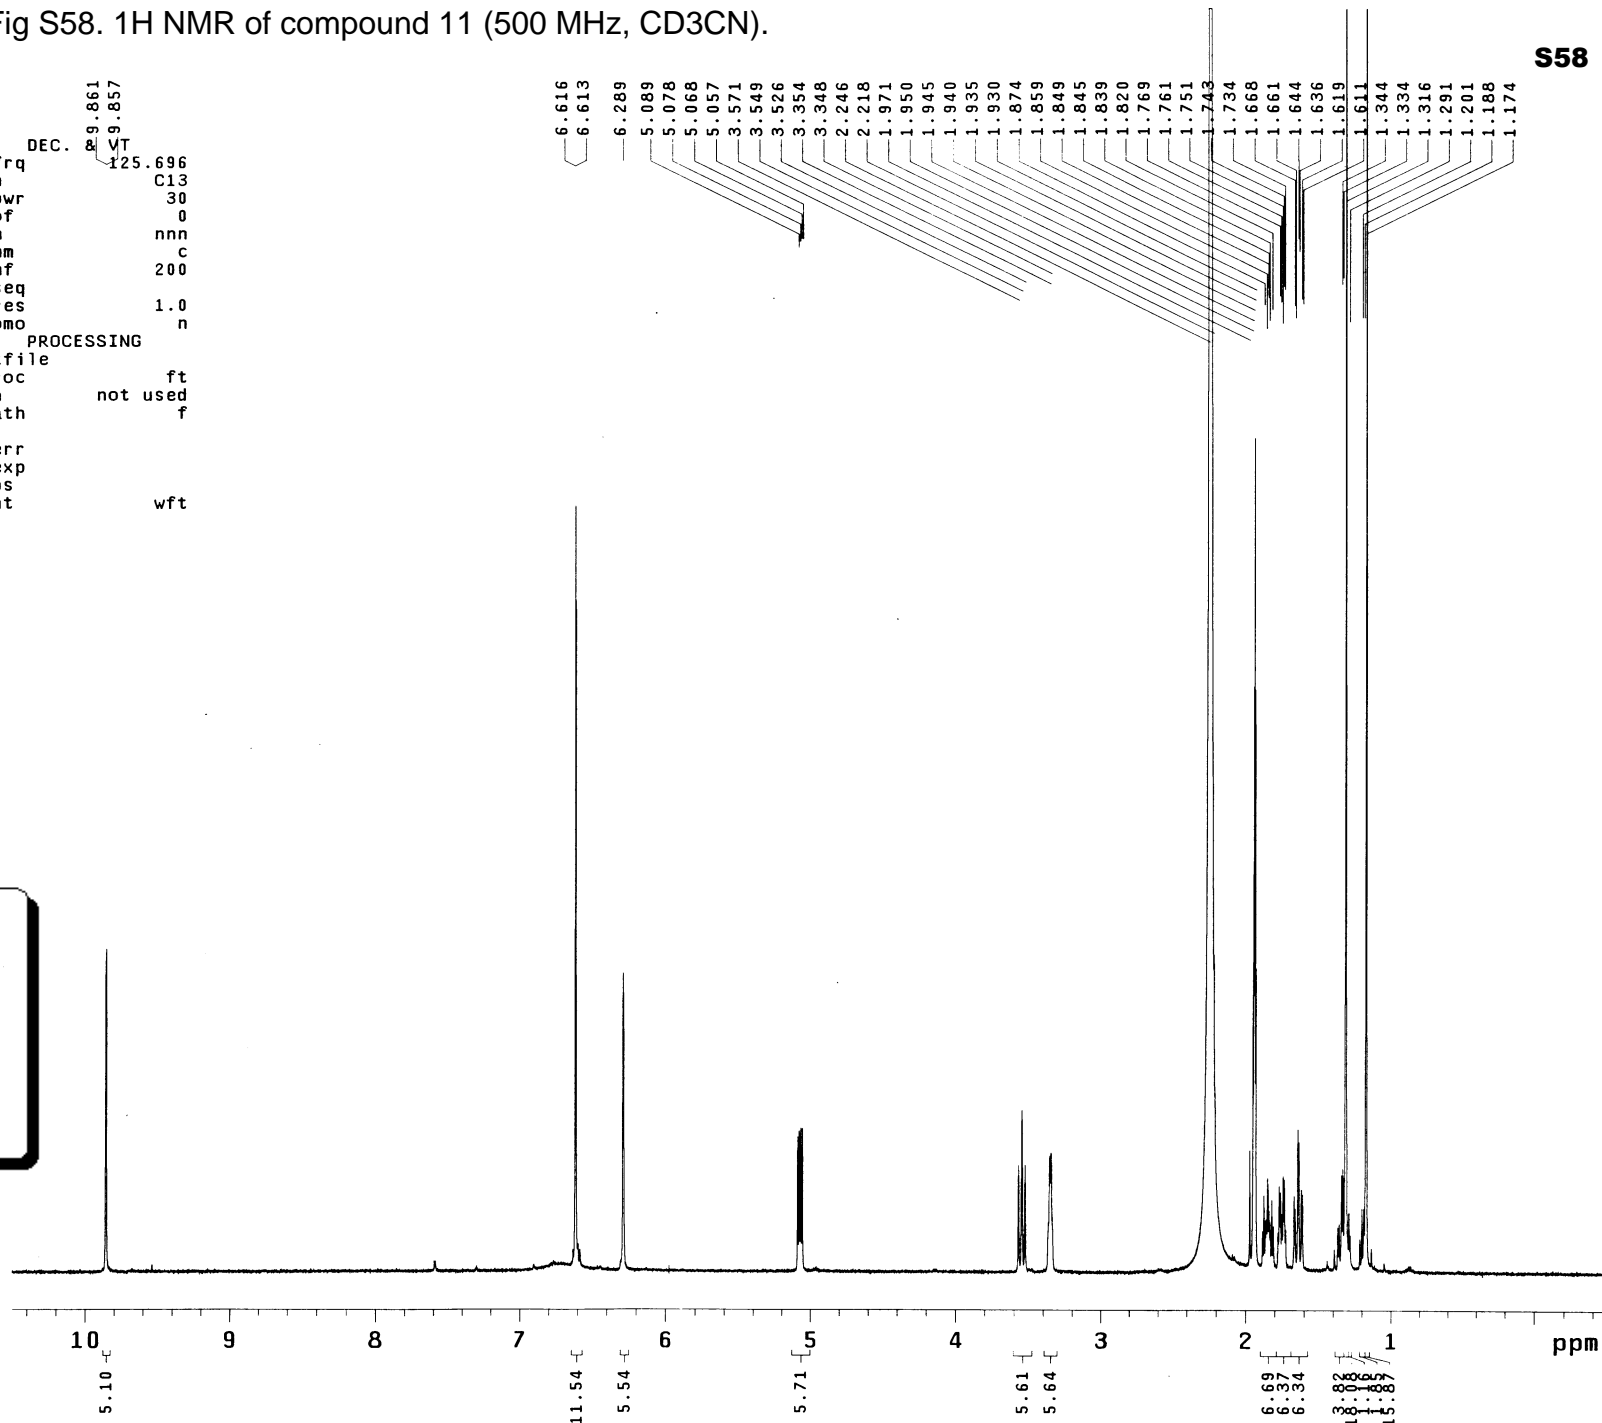

PMK-01-255

exp35 s2pu1

```

SAMPLE
date Sep 15 2009 dfrq 499.838
solvent ch3cn dn H1
file exp dpwr 39
ACQUISITION
sfrq 125.698 dm yvy
tn C13 dmm w
at 1.000 dmf 11905
np 62894 dseq
sw 31446.5 dres 1.0
fb 17000 homo n
bs 16
ss 2 lb 1.00
tpwr 54 wtfile
pw 4.0 proc ft
d1 1.000 fn not used
tof 2512.2 math f
nt 20000
ct 16640 werr
alock y wexp
gain not used wbs
wnt
FLAGS
il n
in n
dp y
hs nn
DISPLAY
sp -1175.7
wp 27650.1
vs 788
sc 0
wc 210
hzmm 131.67
is 500.00
rfl 1342.6
rfp 165.9
th 3
ins 100.000
nm ph
  
```

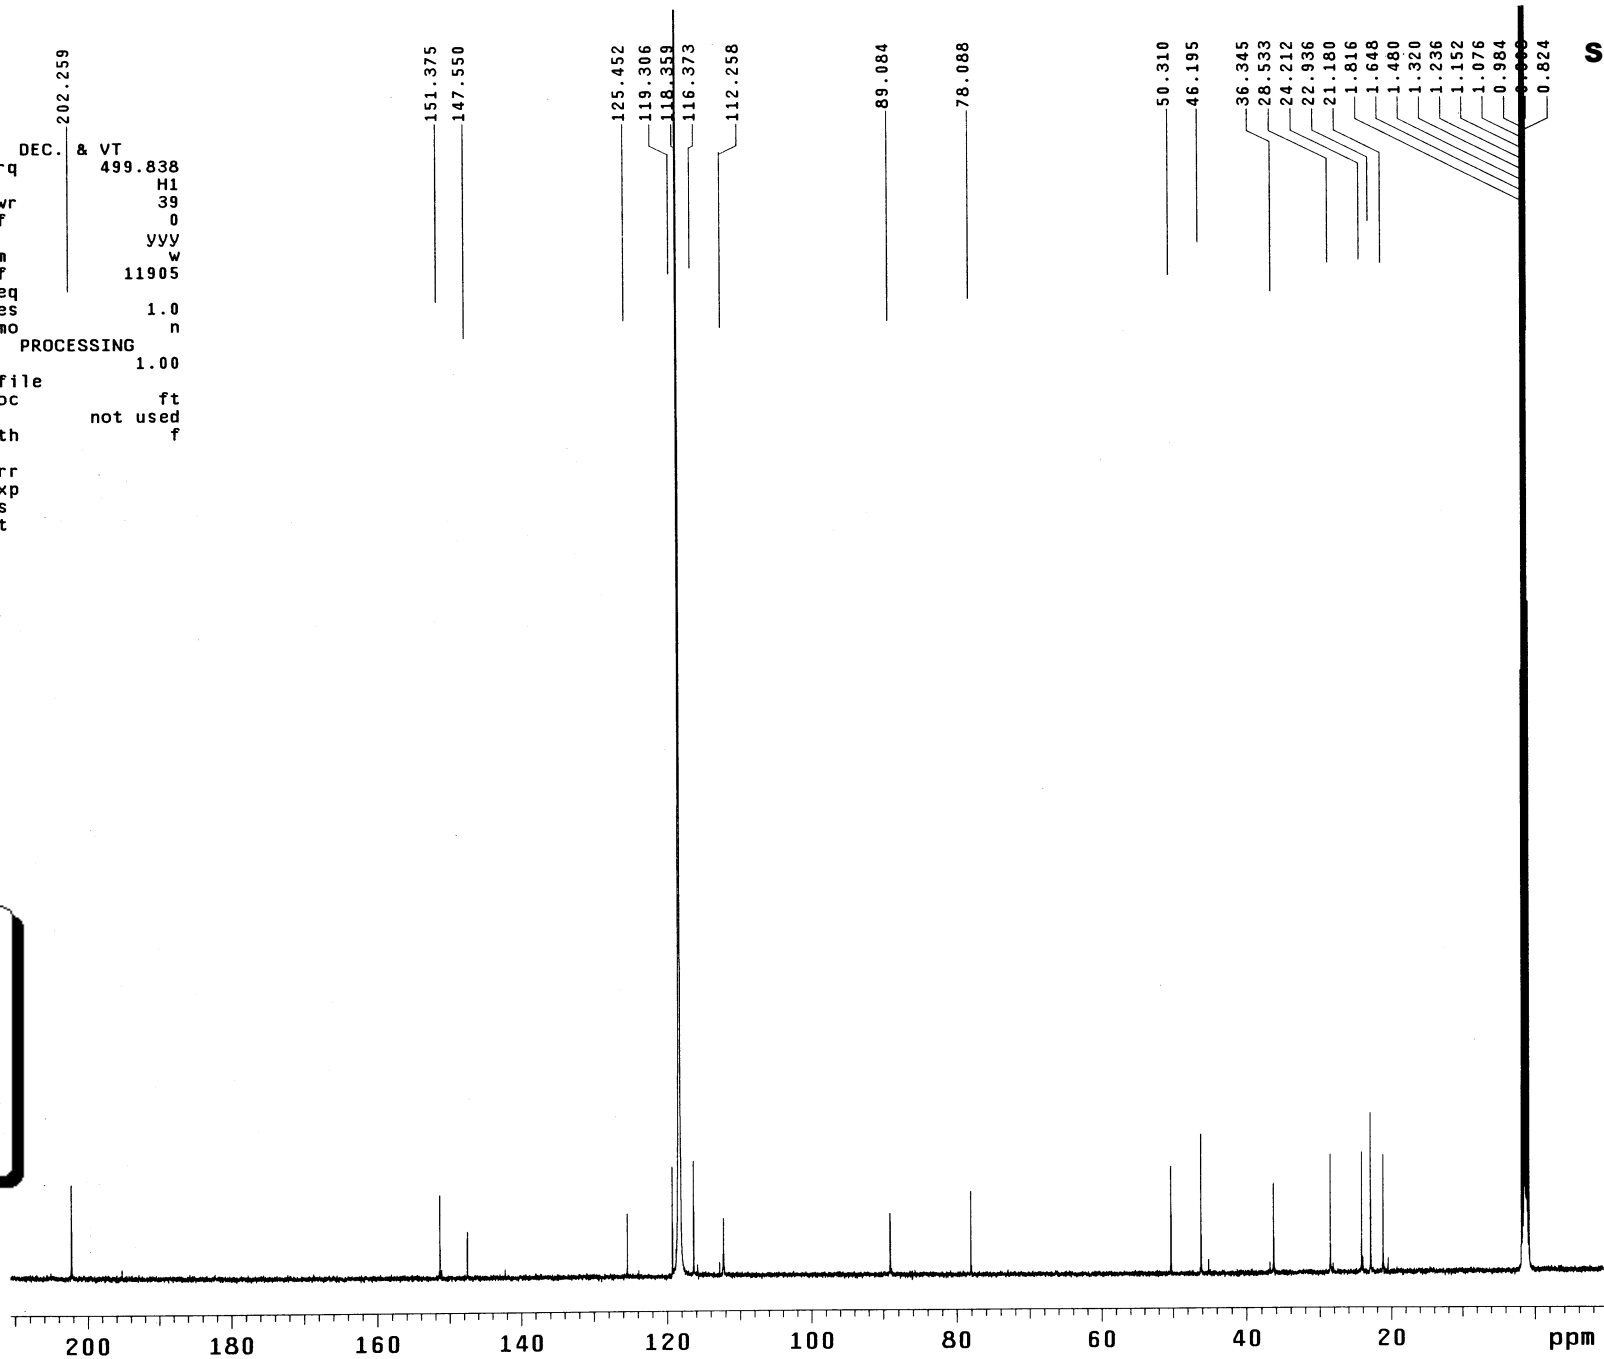

S59

Fig S59. <sup>13</sup>C NMR of compound 11 (125 MHz, CD<sub>3</sub>CN).

Fig S60. DEPT of compound 11 (CD<sub>3</sub>CN).

S60

PMK-01-255

exp34 DEPT

| SAMPLE      |             | DEPT       |          | ACQUISITION ARRAYS |      |
|-------------|-------------|------------|----------|--------------------|------|
| date        | Sep 15 2009 | j1xh       | 140.0    | array              | mult |
| solvent     | ch3cn       | mult       | arrayed  | arraydim           | 3    |
| sample      | undefined   | SPECIAL    |          |                    |      |
| ACQUISITION |             | temp       | not used | i                  | mult |
| sw          | 31446.5     | gain       | 54       | 1                  | 0.5  |
| at          | 1.000       | spin       | 0        | 2                  | 1    |
| np          | 62894       | PROCESSING |          | 3                  | 1.5  |
| bs          | 16          | lb         | 1.00     |                    |      |
| ss          | -4          | fn         | not used |                    |      |
| d1          | 1.000       | SPECTRUM   |          |                    |      |
| nt          | 2000        | wp         | 27650.1  |                    |      |
| ct          | 2000        | sp         | -1257.2  |                    |      |
| TRANSMITTER |             | rp         | -72.0    |                    |      |
| tn          | C13         | lp         | 150.8    |                    |      |
| tof         | 2512.2      | ai         | cdc ph   |                    |      |
| tpwr        | 54          | REFERENCE  |          |                    |      |
| pw          | 9.400       | rfl        | 1269.6   |                    |      |
| DECOUPLER   |             | rfp        | 0        |                    |      |
| dn          | H1          | PLOT       |          |                    |      |
| dof         | 0           | wc         | 210      |                    |      |
| dpwr        | 39          | sc         | 0        |                    |      |
| dm          | nny         | vs         | 872      |                    |      |
| dmm         | ccw         | hzmm       | 131.67   |                    |      |
| dmf         | 11905       | th         | 30       |                    |      |
| pp1v1       | 49          |            |          |                    |      |
| pp          | 29.400      |            |          |                    |      |

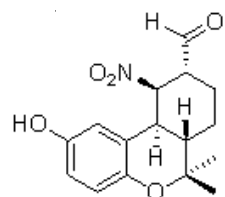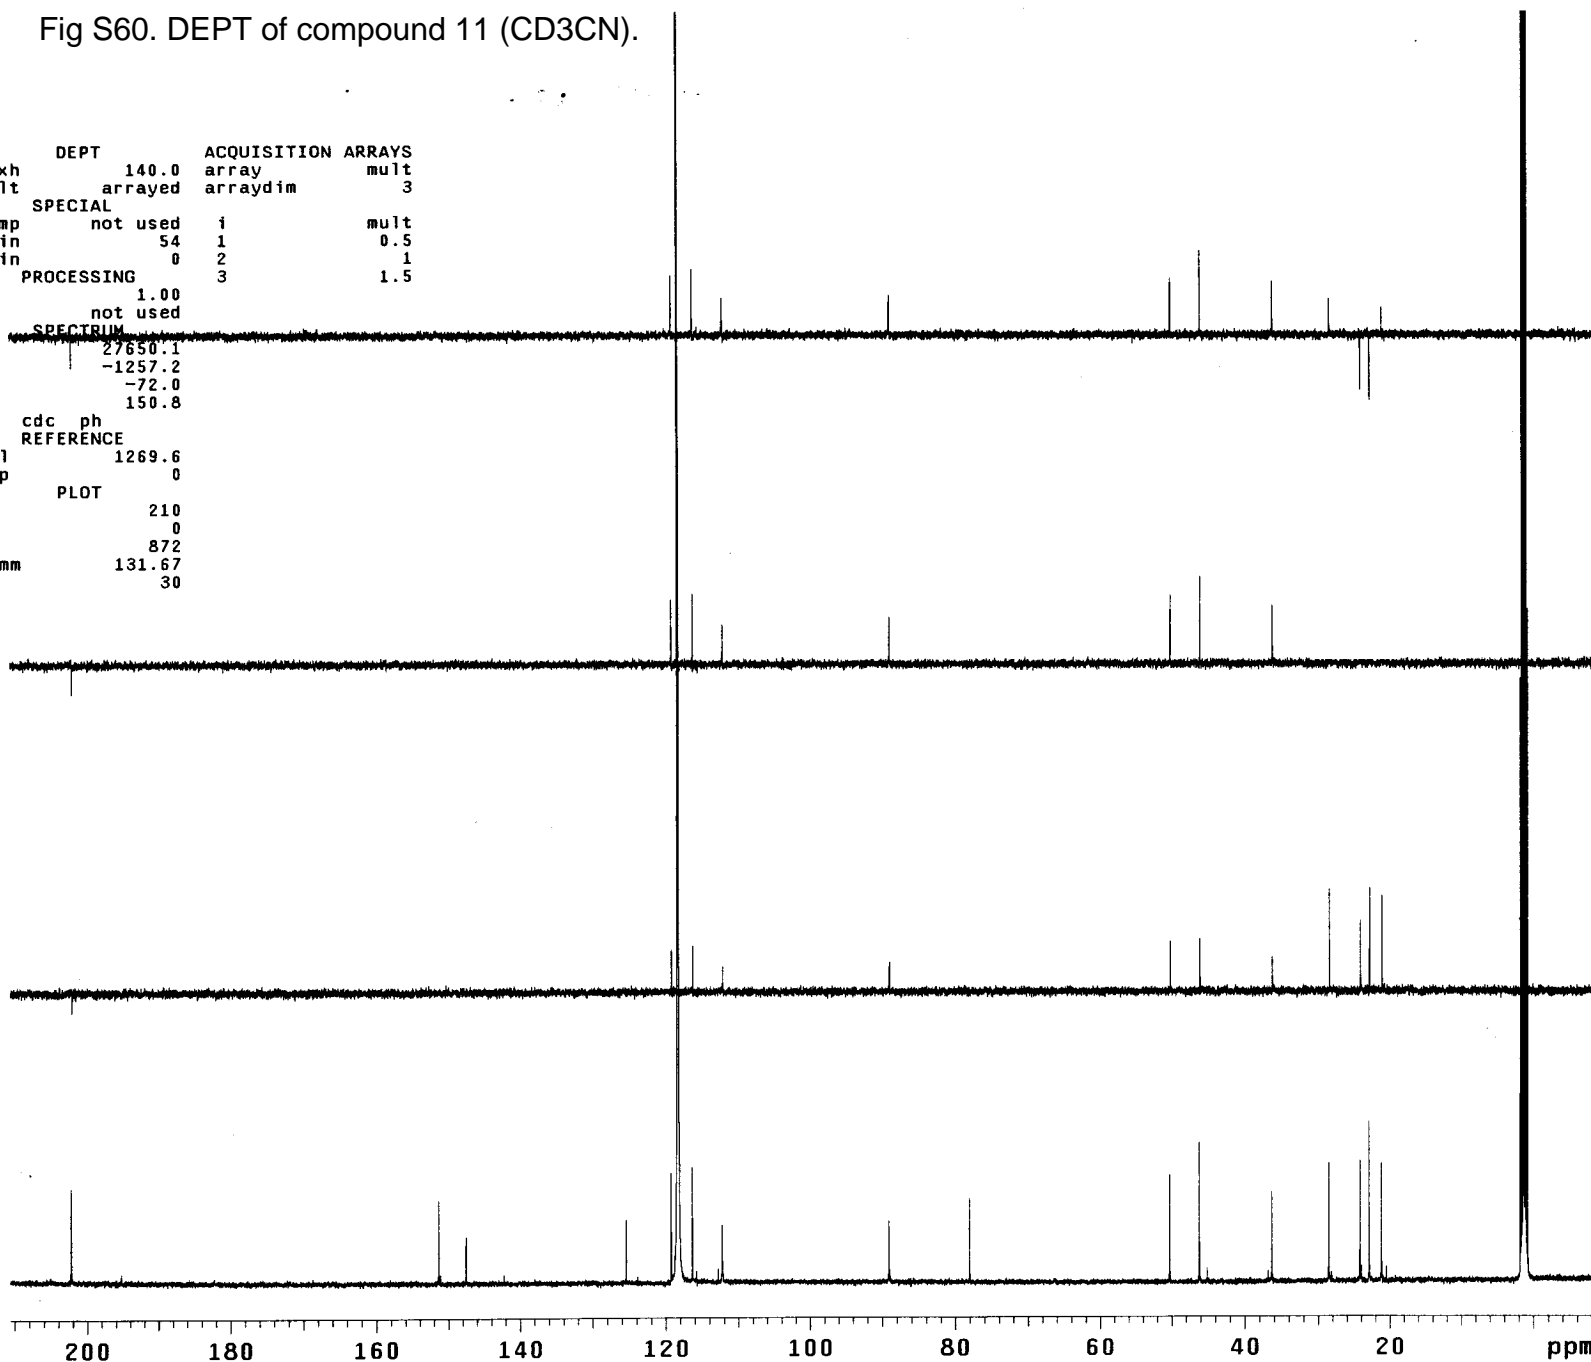

Fig S61. <sup>1</sup>H NMR of compound 12 (500 MHz, CDCl<sub>3</sub>).

S61

PMK-01-222  
exp40 s2pu1

|             |             |            |          |
|-------------|-------------|------------|----------|
| SAMPLE      |             | DEC. & VT  |          |
| date        | Jul 29 2009 | dfrq       | 125 695  |
| solvent     | cdcl3       | dn         | C13      |
| file        | exp         | dpwr       | 30       |
| ACQUISITION |             | dof        | 0        |
| sfrq        | 499.836     | dm         | nnn      |
| tn          | H1          | dmm        | c        |
| at          | 3.000       | dmf        | 200      |
| np          | 48000       | dseq       | 1.0      |
| sw          | 8000.0      | dres       | n        |
| fb          | 4000        | homo       |          |
| bs          | 4           | PROCESSING |          |
| tpwr        | 57          | wtfile     |          |
| pw          | 4.8         | proc       | ft       |
| d1          | 1.000       | fn         | not used |
| tof         | 499.7       | math       | f        |
| nt          | 16          |            |          |
| ct          | 16          | werr       | react    |
| alock       | y           | wexp       | procplot |
| gain        | not used    | wbs        |          |
| FLAGS       |             | wnt        | wft      |
| il          | n           |            |          |
| in          | n           |            |          |
| dp          | y           |            |          |
| hs          | nn          |            |          |
| DISPLAY     |             |            |          |
| sp          | -250.1      |            |          |
| wp          | 5748.0      |            |          |
| vs          | 100         |            |          |
| sc          | 0           |            |          |
| wc          | 210         |            |          |
| hzmm        | 27.37       |            |          |
| is          | 42.72       |            |          |
| rfl         | 4631.3      |            |          |
| rfp         | 3628.8      |            |          |
| th          | 3           |            |          |
| ins         | 100.000     |            |          |
| nm          | cdc ph      |            |          |

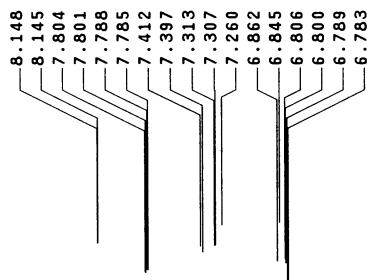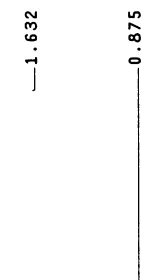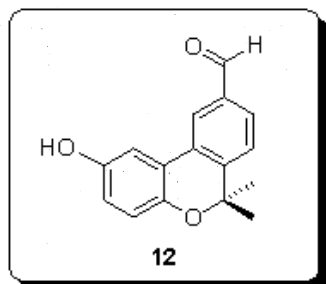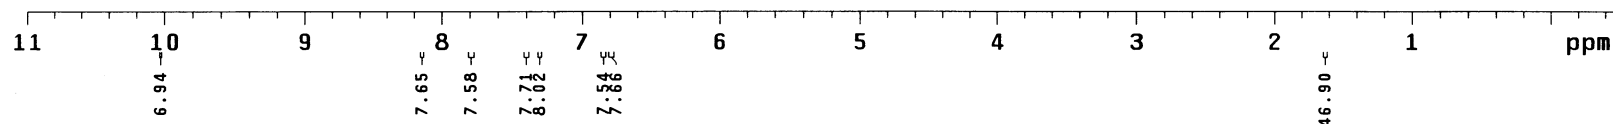

Fig S62. <sup>13</sup>C NMR of compound 12 (125 MHz, CDCl<sub>3</sub>).

S62

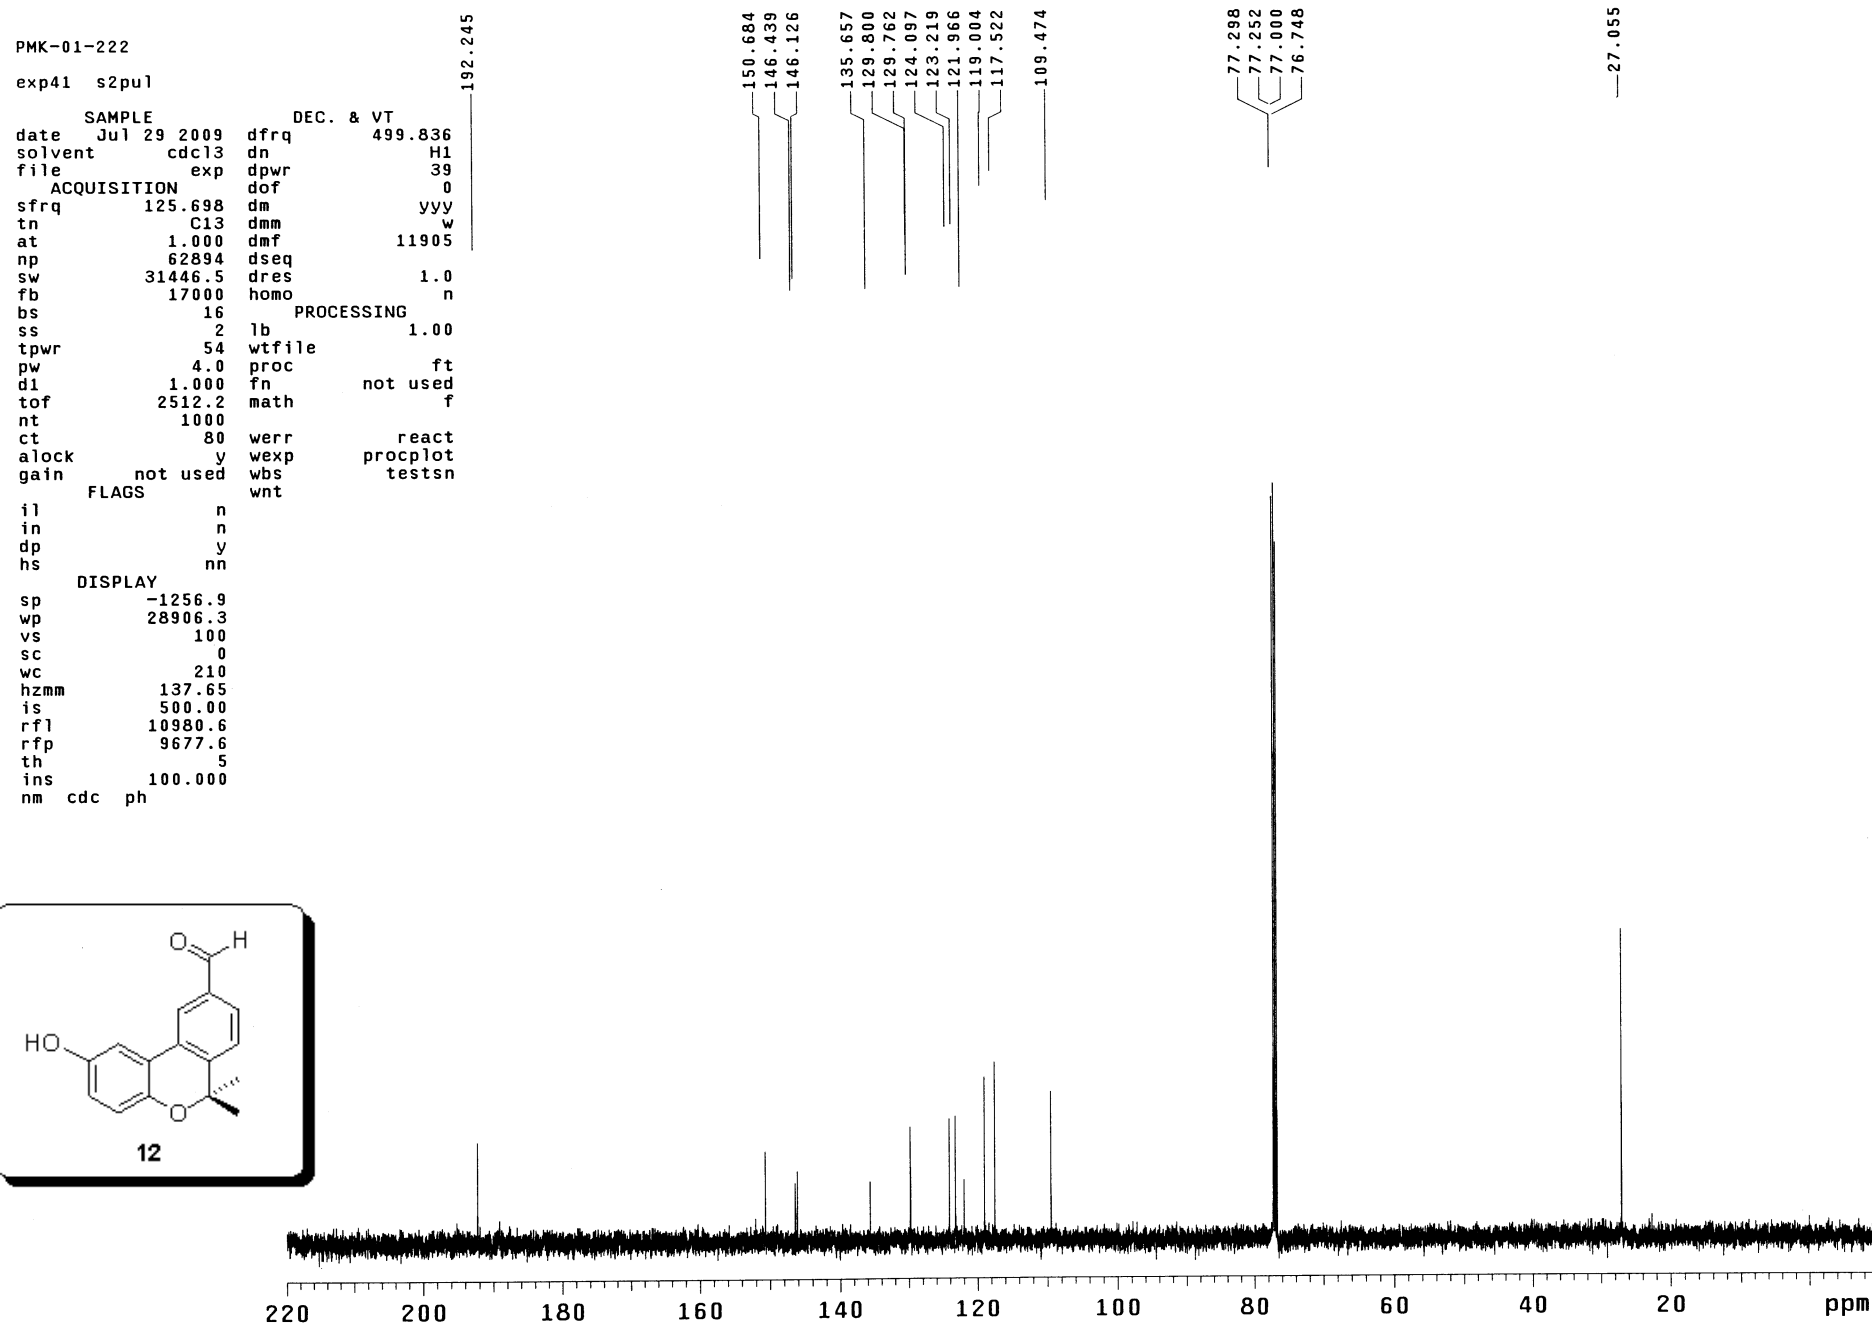

Fig S63. <sup>13</sup>C NMR of compound 12 (125 MHz, CDCl<sub>3</sub>), expanded.

S63

PMK-01-222  
exp40 s2pul

| SAMPLE               |                | DEC. & VT  |          |
|----------------------|----------------|------------|----------|
| date                 | Jul 29 2009    | dfrq       | 499.836  |
| solvent              | cdcl3          | dn         | H1       |
| file                 | /export/home/~ | dpwr       | 39       |
| vnmr1/vnmrsys/data/~ |                | dof        | 0        |
| /PMK/PMK-01-222/C.~  |                | dm         | yyy      |
|                      | fid            | dmm        | w        |
| ACQUISITION          |                | dmf        | 11905    |
| sfrq                 | 125.698        | dseq       |          |
| tn                   | C13            | dres       | 1.0      |
| at                   | 1.000          | homo       | n        |
| np                   | 62894          | PROCESSING |          |
| sw                   | 31446.5        | lb         | 1.00     |
| fb                   | 17000          | wtfile     |          |
| bs                   | 16             | proc       | ft       |
| ss                   | 2              | fn         | not used |
| tpwr                 | 54             | math       | f        |
| pw                   | 4.0            |            |          |
| d1                   | 1.000          | werr       | react    |
| tof                  | 2512.2         | wexp       | procplot |
| nt                   | 1000           | wbs        | testsn   |
| ct                   | 80             | wnt        |          |
| alock                | y              |            |          |
| gain                 | not used       |            |          |
| FLAGS                |                |            |          |
| il                   | n              |            |          |
| in                   | n              |            |          |
| dp                   | y              |            |          |
| hs                   | nn             |            |          |
| DISPLAY              |                |            |          |
| sp                   | 9614.3         |            |          |
| wp                   | 124.8          |            |          |
| vs                   | 100            |            |          |
| sc                   | 0              |            |          |
| wc                   | 210            |            |          |
| hzmm                 | 0.60           |            |          |
| is                   | 500.00         |            |          |
| rfl                  | 10980.6        |            |          |
| rfp                  | 9677.6         |            |          |
| th                   | 5              |            |          |
| ins                  | 100.000        |            |          |
| nm                   | cdc            | ph         |          |

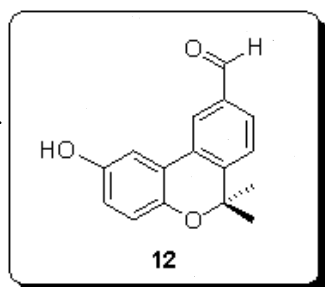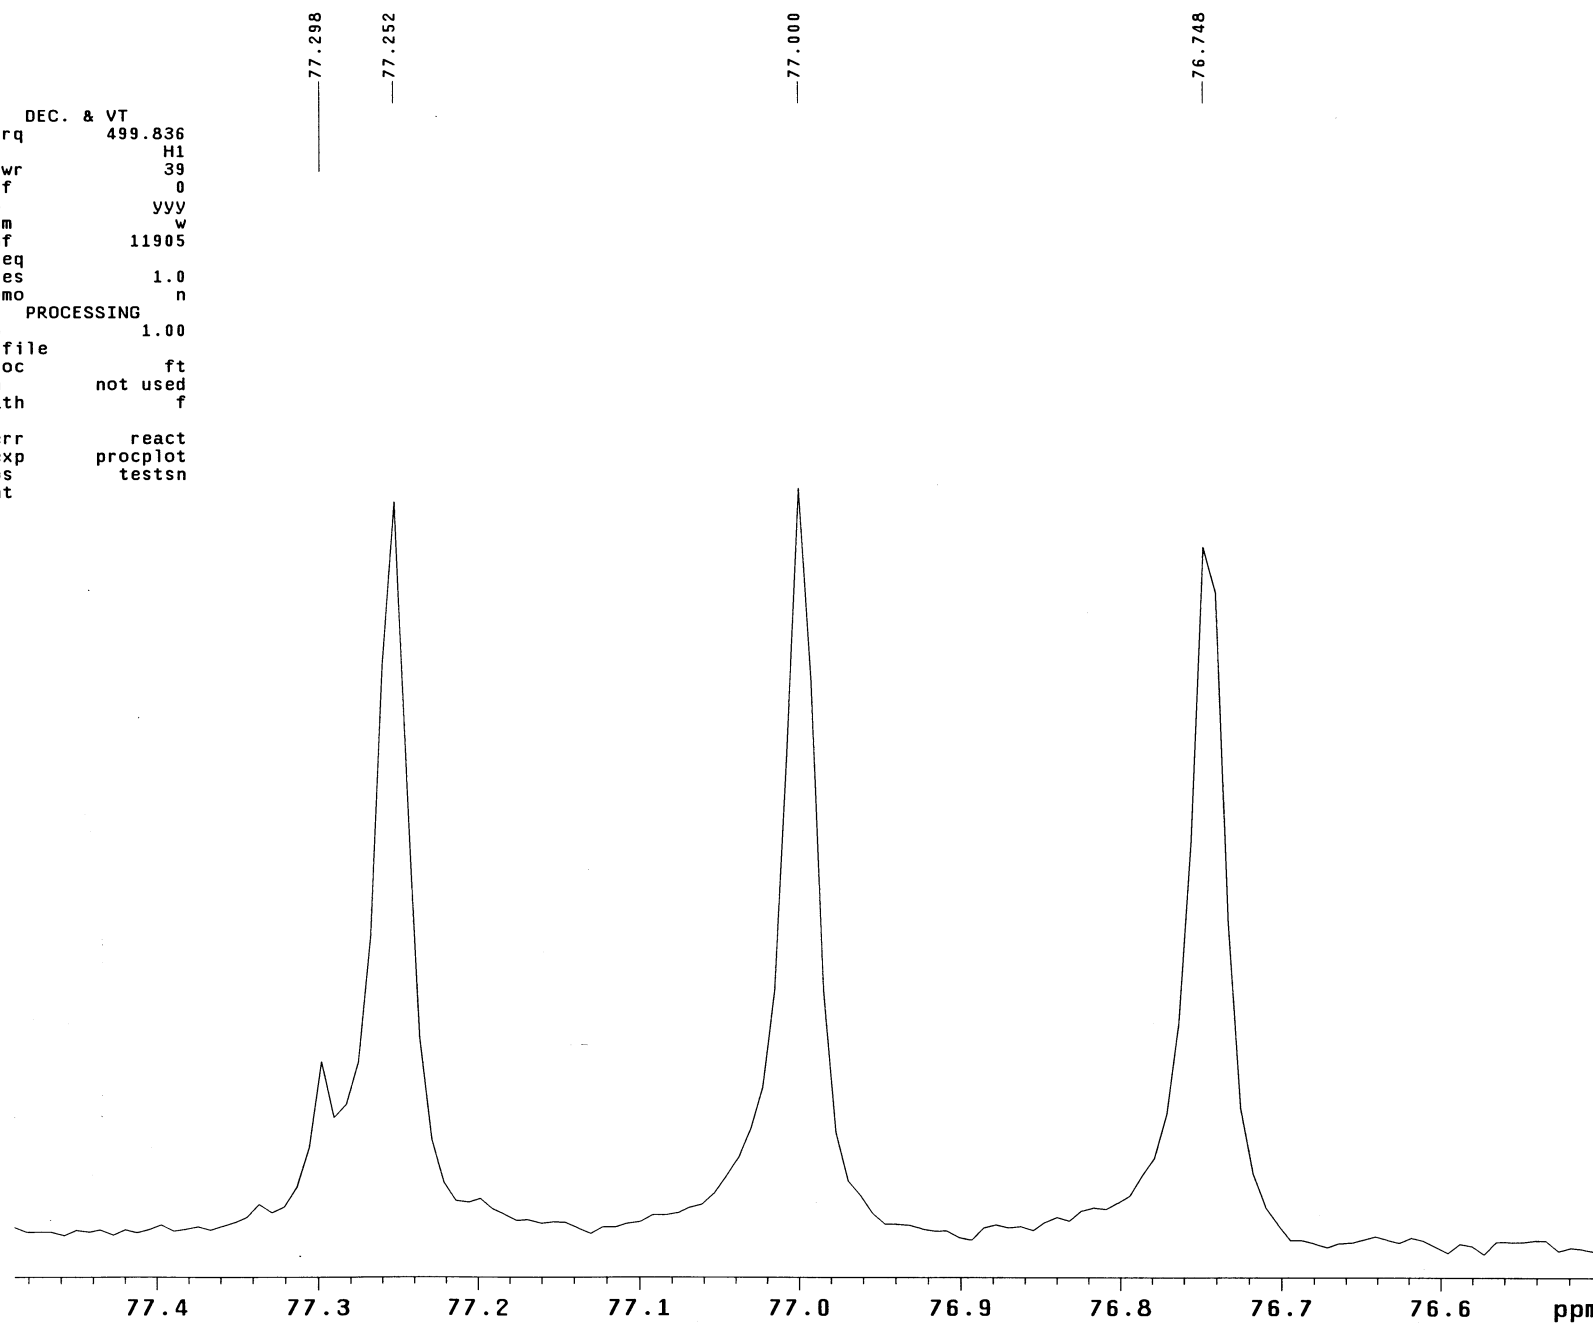

Fig S64. DEPT of compound 12 (CDCl<sub>3</sub>).

S64

PMK-01-222

exp41 s2pu1

```

SAMPLE          DEC. & VT
date Jul 29 2009 dfrq      499.836
solvent cdc13      dn       H1
file exp          dpwr     39
ACQUISITION      dof      0
sfrq 125.698      dm       yyy
tn C13            dmm      w
at 1.000          dmf     11905
np 62894          dseq
sw 31446.5        dres     1.0
fb 17000          homg
bs 16            PROCESSING
ss 2             lb       1.00
tpwr 54          wtfile
pw 4.0          proc     ft
d1 1.000        fn       not used
tof 2512.2      math     f
nt 1000
ct 80          werr      react
alock y        wexp     procplot
gain not used   wbs      testsn
wnt
FLAGS
il n
in n
dp y
hs nn
DISPLAY
sp -1256.9
wp 28906.3
vs 30
sc 0
wc 210
hzmm 137.65
is 500.00
rfl 10980.6
rfp 9677.6
th 5
ins 100.000
nm cdc ph
```

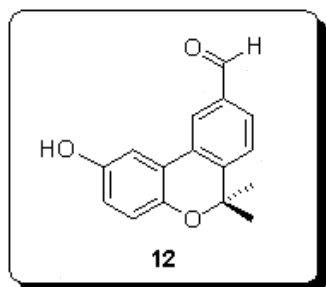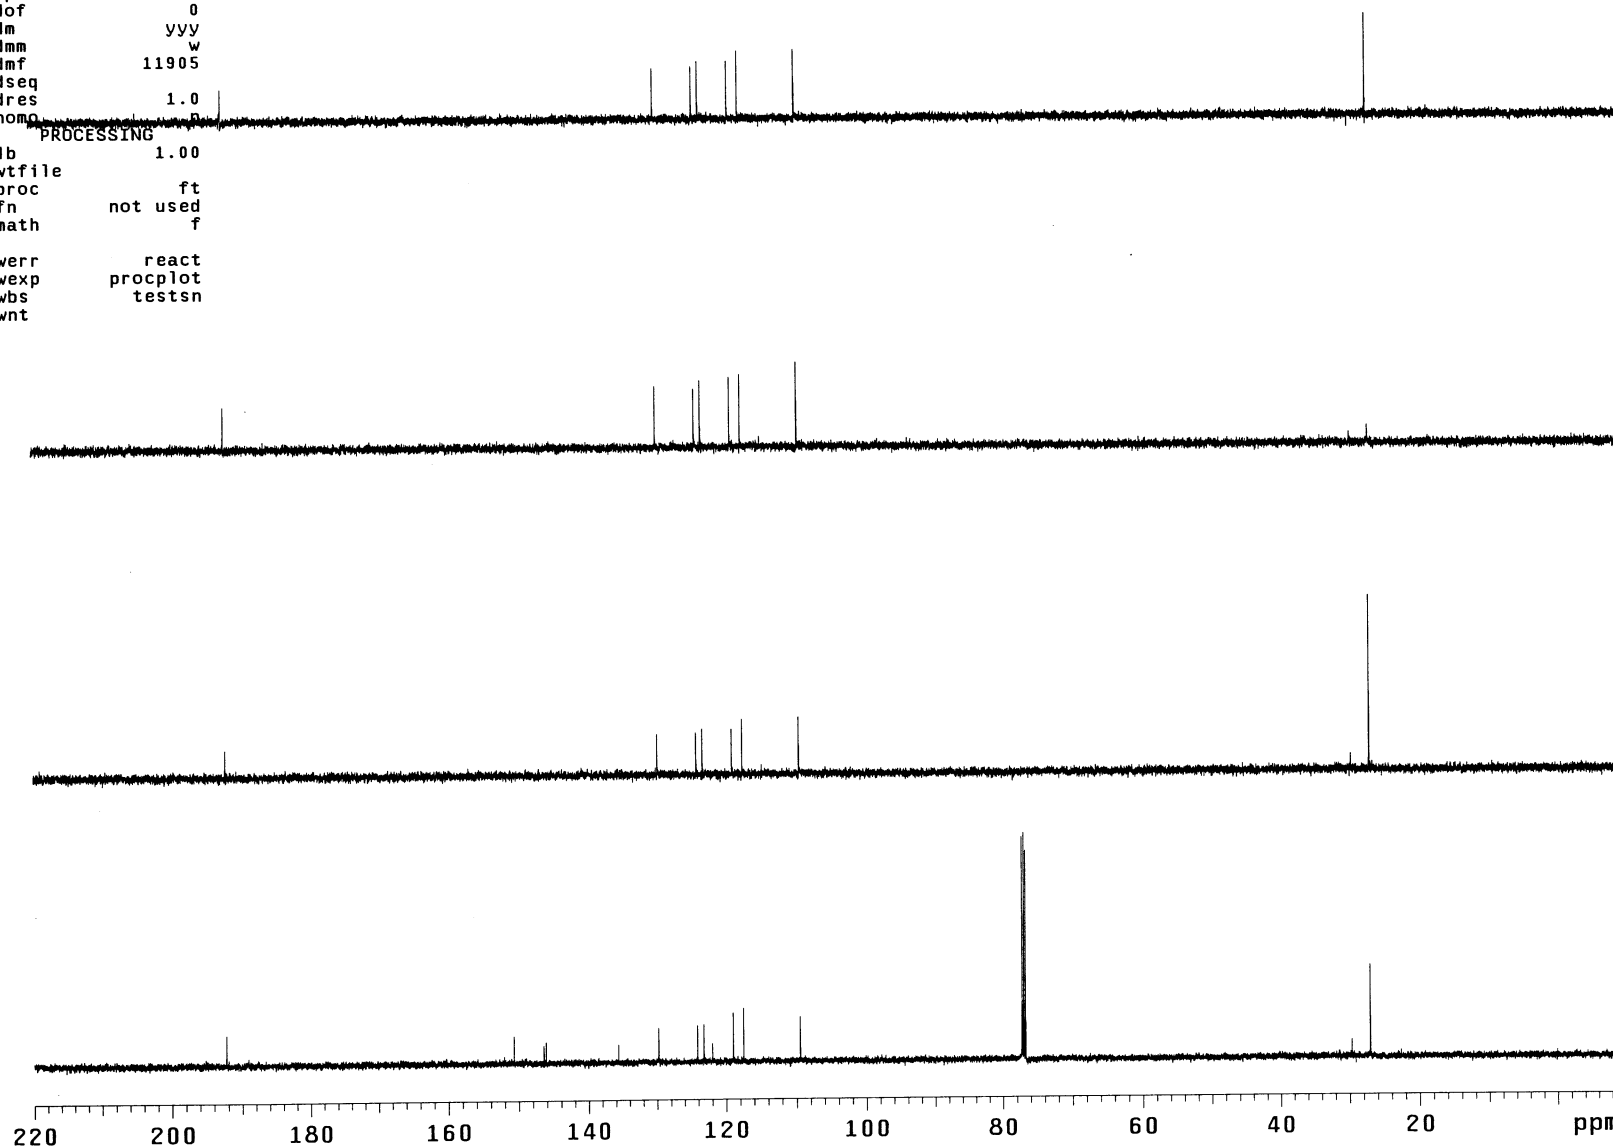

Fig S65. <sup>1</sup>H NMR of compound 13 (500 MHz, CDCl<sub>3</sub>).

S65

PMK-01-233

exp12 s2pul

|             |                   |            |          |
|-------------|-------------------|------------|----------|
| SAMPLE      |                   | DEC. & VT  |          |
| date        | Nov 30 2009       | dfrq       | 125.693  |
| solvent     | CDCl <sub>3</sub> | dn         | C13      |
| file        | exp               | dpwr       | 30       |
| ACQUISITION |                   | dof        | 0        |
| sfrq        | 499.830           | dm         | nnn      |
| tn          | H1                | dmm        | c        |
| at          | 3.000             | dmf        | 200      |
| np          | 48000             | dseq       |          |
| sw          | 8000.0            | dres       | 1.0      |
| fb          | not used          | homo       | n        |
| bs          | 4                 | PROCESSING |          |
| tpwr        | 58                | wtfile     |          |
| pw          | 4.8               | proc       | ft       |
| dl          | 1.000             | fn         | not used |
| tof         | 499.7             | math       | f        |
| nt          | 4                 |            |          |
| ct          | 4                 | werr       |          |
| alock       | y                 | wexp       |          |
| gain        | not used          | wbs        |          |
| FLAGS       |                   | wnt        | wft      |
| il          | n                 |            |          |
| in          | n                 |            |          |
| dp          | y                 |            |          |
| hs          | nn                |            |          |
| DISPLAY     |                   |            |          |
| sp          | -250.1            |            |          |
| wp          | 4998.0            |            |          |
| vs          | 98                |            |          |
| sc          | 0                 |            |          |
| wc          | 210               |            |          |
| hzmm        | 23.80             |            |          |
| is          | 64.27             |            |          |
| rfl         | 4638.2            |            |          |
| rfp         | 3618.7            |            |          |
| th          | 3                 |            |          |
| ins         | 100.000           |            |          |
| nm          | ph                |            |          |

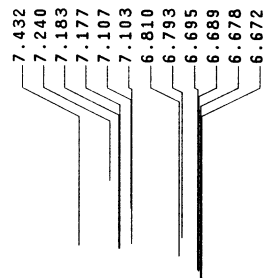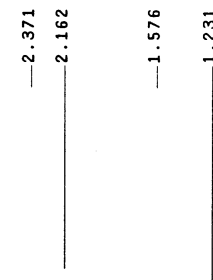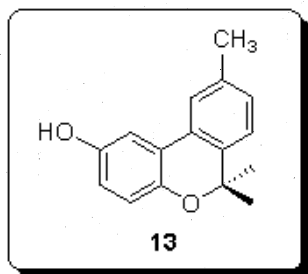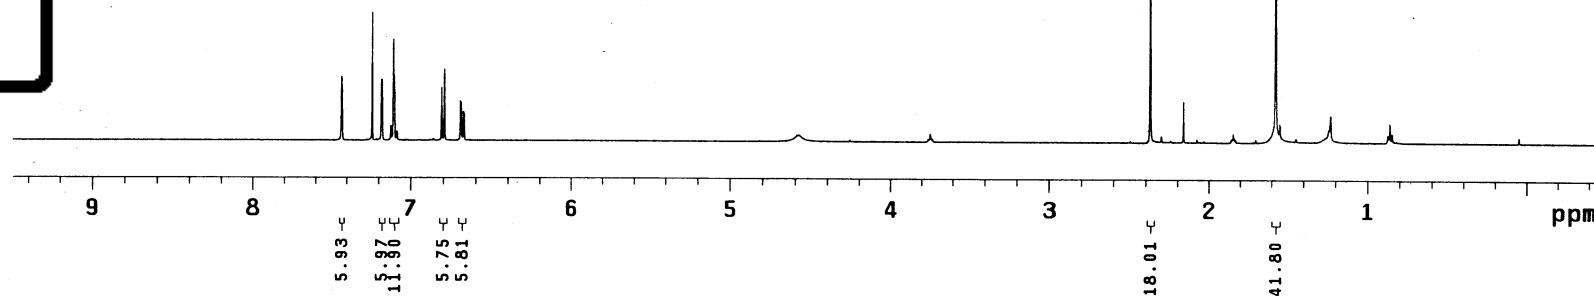

Fig S66. <sup>13</sup>C NMR of compound 13 (125 MHz, CDCl<sub>3</sub>).

PMK-1-233  
exp43 s2pu1

|             |            |            |          |
|-------------|------------|------------|----------|
| SAMPLE      |            | DEC. & VT  |          |
| date        | Aug 4 2009 | dfrq       | 499.836  |
| solvent     | cdcl3      | dn         | H1       |
| file        | exp        | dpwr       | 39       |
| ACQUISITION |            | dof        | 0        |
| sfrq        | 125.698    | dm         | yyy      |
| tn          | C13        | dmm        | w        |
| at          | 1.000      | dmf        | 11905    |
| np          | 62894      | dseq       |          |
| sw          | 31446.5    | dres       | 1.0      |
| fb          | 17000      | homo       | n        |
| bs          | 16         | PROCESSING |          |
| ss          | 2          | lb         | 1.00     |
| tpwr        | 54         | wtfile     |          |
| pw          | 4.0        | proc       | ft       |
| d1          | 1.000      | fn         | not used |
| tof         | 2512.2     | math       | f        |
| nt          | 10000      |            |          |
| ct          | 10000      | werr       | react    |
| alock       | y          | wexp       | procplot |
| gain        | not used   | wbs        | testsn   |
| FLAGS       |            | wnt        |          |
| il          | n          |            |          |
| in          | n          |            |          |
| dp          | y          |            |          |
| hs          | nn         |            |          |
| DISPLAY     |            |            |          |
| sp          | -1256.9    |            |          |
| wp          | 28906.3    |            |          |
| vs          | 100        |            |          |
| sc          | 0          |            |          |
| wc          | 210        |            |          |
| hzmm        | 137.65     |            |          |
| is          | 500.00     |            |          |
| rfl         | 10980.6    |            |          |
| rfp         | 9677.6     |            |          |
| th          | 2          |            |          |
| ins         | 100.000    |            |          |
| nm          | cdc ph     |            |          |

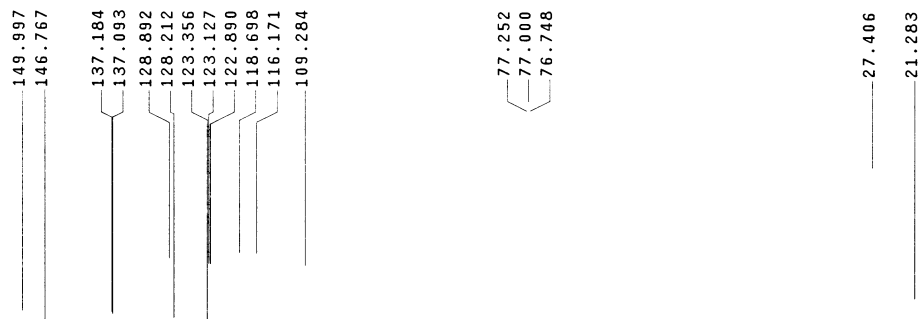

S66

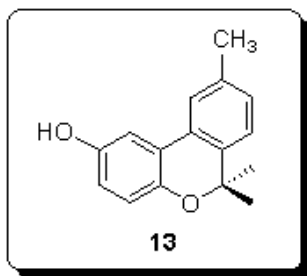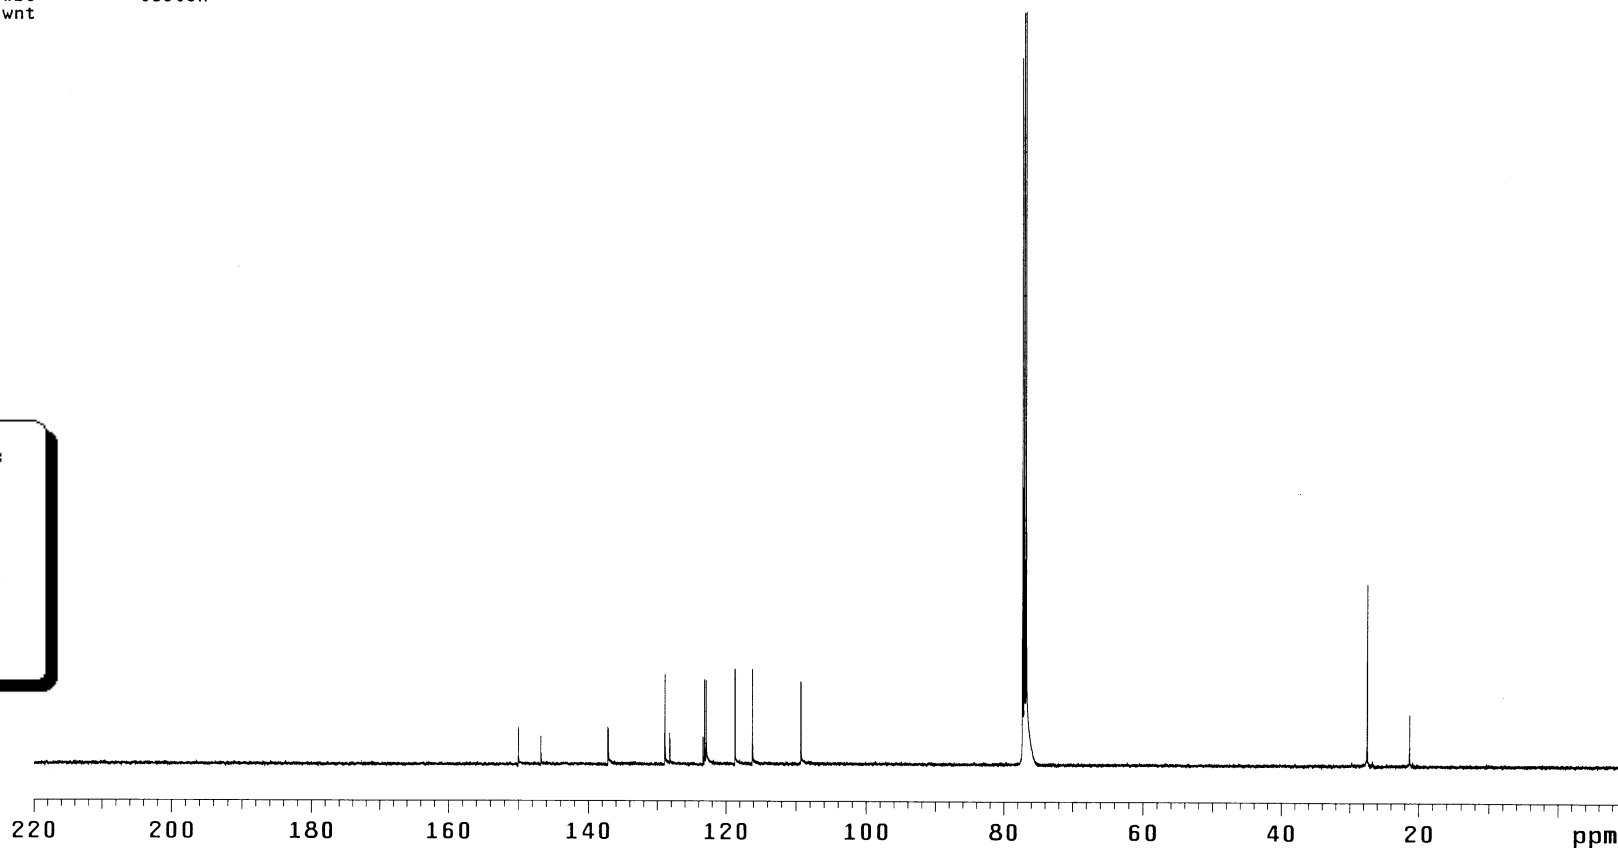

Fig S67. DEPT of compound 13 (CDCl<sub>3</sub>).

S67

PMK-1-233

exp43 s2pu1

| SAMPLE      |            | DEC. & VT  |          |
|-------------|------------|------------|----------|
| date        | Aug 4 2009 | dfrq       | 499.836  |
| solvent     | cdcl3      | dn         | H1       |
| file        | exp        | dpwr       | 39       |
| ACQUISITION |            | do         | 0        |
| sfrq        | 125.698    | dm         | yyy      |
| tn          | C13        | dmm        | w        |
| at          | 1.000      | dmf        | 11905    |
| np          | 62894      | dseq       |          |
| sw          | 31446.5    | dres       | 1.0      |
| fb          | 17000      | homo       | n        |
| bs          | 16         | PROCESSING |          |
| ss          | 2          | lb         | 1.00     |
| tpwr        | 54         | wtfile     |          |
| pw          | 4.0        | proc       | ft       |
| d1          | 1.000      | fn         | not used |
| tof         | 2512.2     | math       | f        |
| nt          | 10000      |            |          |
| ct          | 10000      | werr       | react    |
| alock       | y          | wexp       | procplot |
| gain        | not used   | wbs        | testsn   |
| FLAGS       |            | wnt        |          |
| il          | n          |            |          |
| in          | n          |            |          |
| dp          | y          |            |          |
| hs          | nn         |            |          |
| DISPLAY     |            |            |          |
| sp          | -1256.9    |            |          |
| wp          | 28906.3    |            |          |
| vs          | 100        |            |          |
| sc          | 0          |            |          |
| wc          | 210        |            |          |
| hzmm        | 137.65     |            |          |
| is          | 500.00     |            |          |
| rfl         | 10980.6    |            |          |
| rfp         | 9677.6     |            |          |
| th          | 2          |            |          |
| ins         | 100.000    |            |          |
| nm          | cdc ph     |            |          |

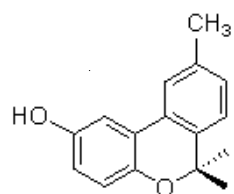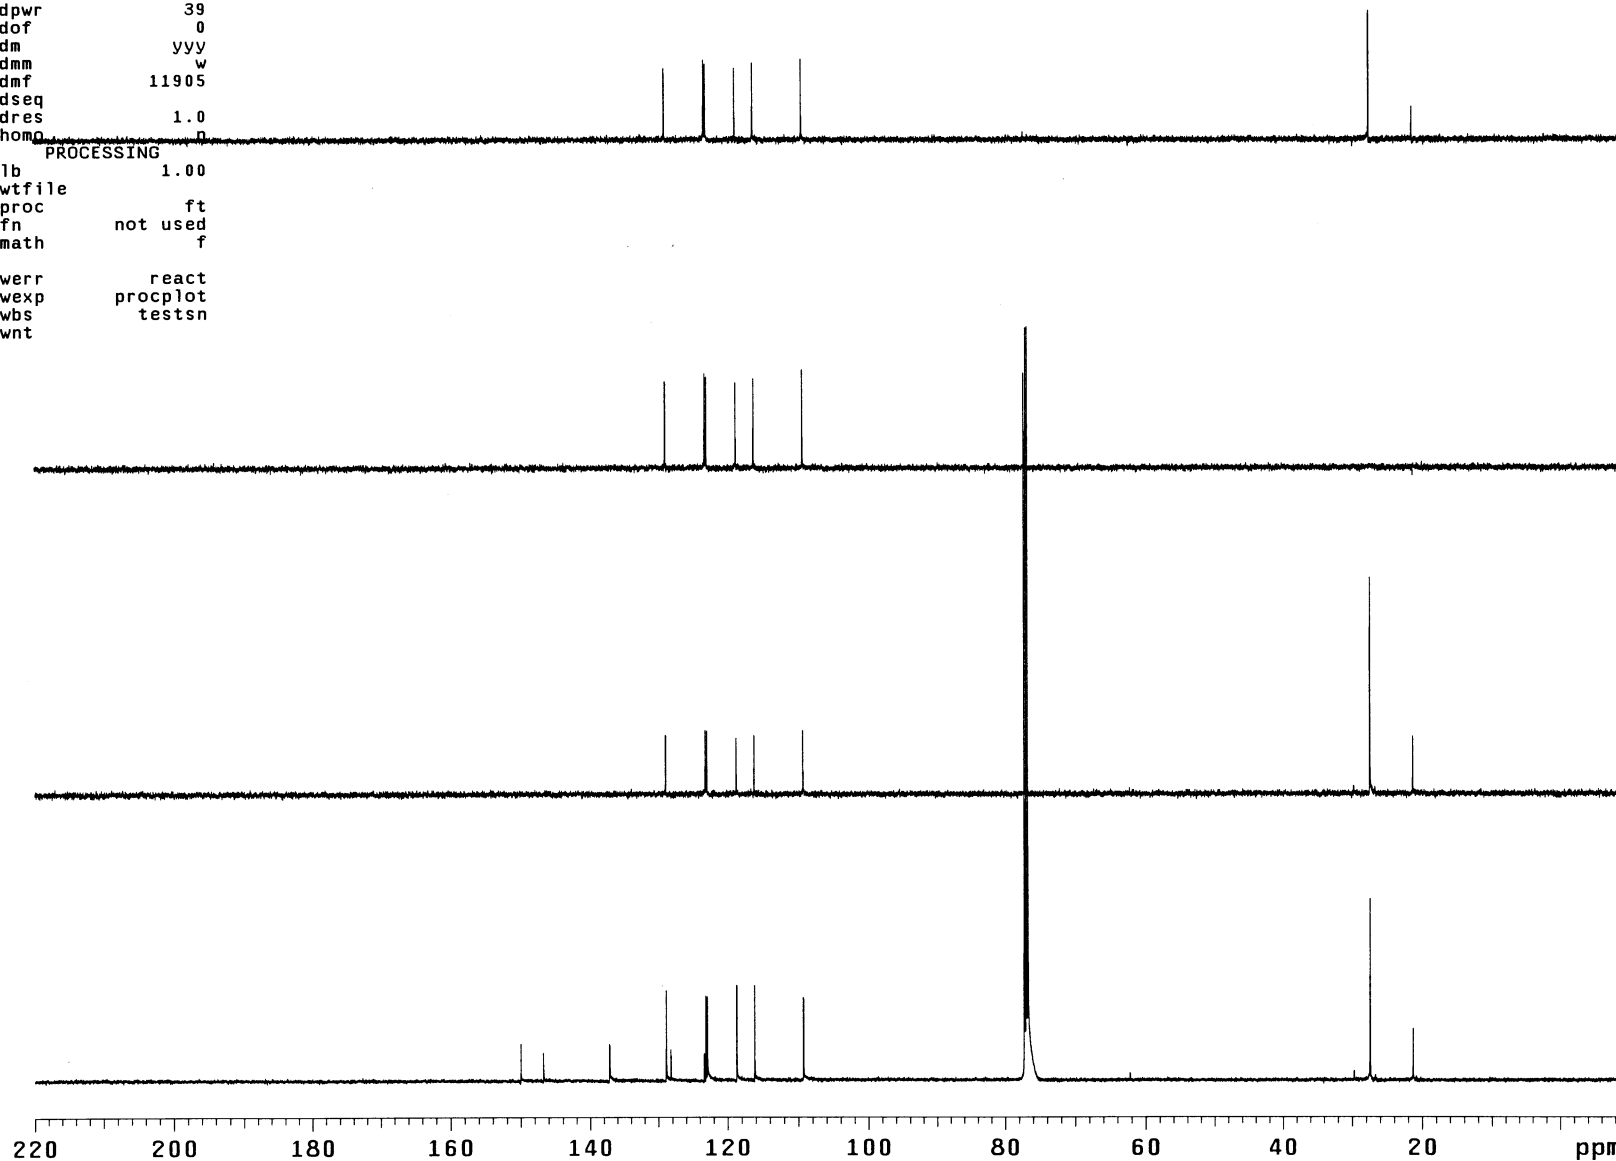

Fig S68. HSQC of compound 13 (CDCl<sub>3</sub>).

S68

PMK-01-233

exp16 gHSQC

| SAMPLE         |             | FLAGS         | ACQUISITION |          | ARRAYS |
|----------------|-------------|---------------|-------------|----------|--------|
| date           | Nov 30 2009 | hs            | n           | array    | phase  |
| solvent        | cdcl3       | sspul         | y           | arraydim | 256    |
| sample         | undefined   | PFGflg        | y           |          |        |
| ACQUISITION    |             | hsglv1        | 1003        | i        | phase  |
| sw             | 4001.6      | SPECIAL       | 1           | 1        | 1      |
| at             | 0.128       | temp          | not used    | 2        | 2      |
| np             | 1024        | gain          | 34          |          |        |
| fb             | not used    | spin          | 0           |          |        |
| ss             | 32          | GRADIENTS     |             |          |        |
| d1             | 1.000       | gzlv11        | 1003        |          |        |
| nt             | 8           | gt1           | 0.002000    |          |        |
| 2D ACQUISITION |             | gzlv13        | 505         |          |        |
| sw1            | 21367.5     | gt3           | 0.001000    |          |        |
| ni             | 128         | gstab         | 0.000500    |          |        |
| phase          | arrayed     | F2 PROCESSING |             |          |        |
| TRANSMITTER    |             | gf            | 0.059       |          |        |
| tn             | H1          | gfs           | not used    |          |        |
| sfrq           | 499.829     | fn            | 1024        |          |        |
| tof            | -250.0      | F1 PROCESSING |             |          |        |
| tpwr           | 58          | gf1           | 0.006       |          |        |
| pw             | 11.100      | gfs1          | not used    |          |        |
| DECOUPLER      |             | procl         | lp          |          |        |
| dn             | C13         | fn1           | 2048        |          |        |
| dof            | -2515.2     | DISPLAY       |             |          |        |
| dm             | nny         | sp            | 662.6       |          |        |
| dmm            | ccp         | wp            | 3282.6      |          |        |
| dmf            | 32258       | sp1           | 2289.7      |          |        |
| dpwr           | 36          | wp1           | 14439.8     |          |        |
| pxwlv1         | 52          | rfl           | -248.4      |          |        |
| pxw            | 14.300      | rfl1          | 1257.6      |          |        |
| HSQC           |             | rflp1         | 0           |          |        |
| j1xh           | 140.0       | PLOT          |             |          |        |
| nullflg        | y           | wc            | 150.0       |          |        |
| mult           | 2           | sc            | 6.2         |          |        |
|                |             | wc2           | 116.2       |          |        |
|                |             | sc2           | 0           |          |        |
|                |             | vs            | 227         |          |        |
|                |             | th            | 4           |          |        |
|                |             | ai            | cdc         | ph       |        |

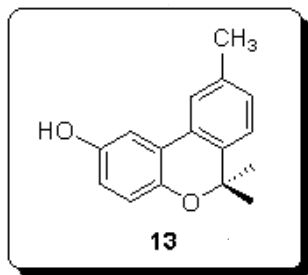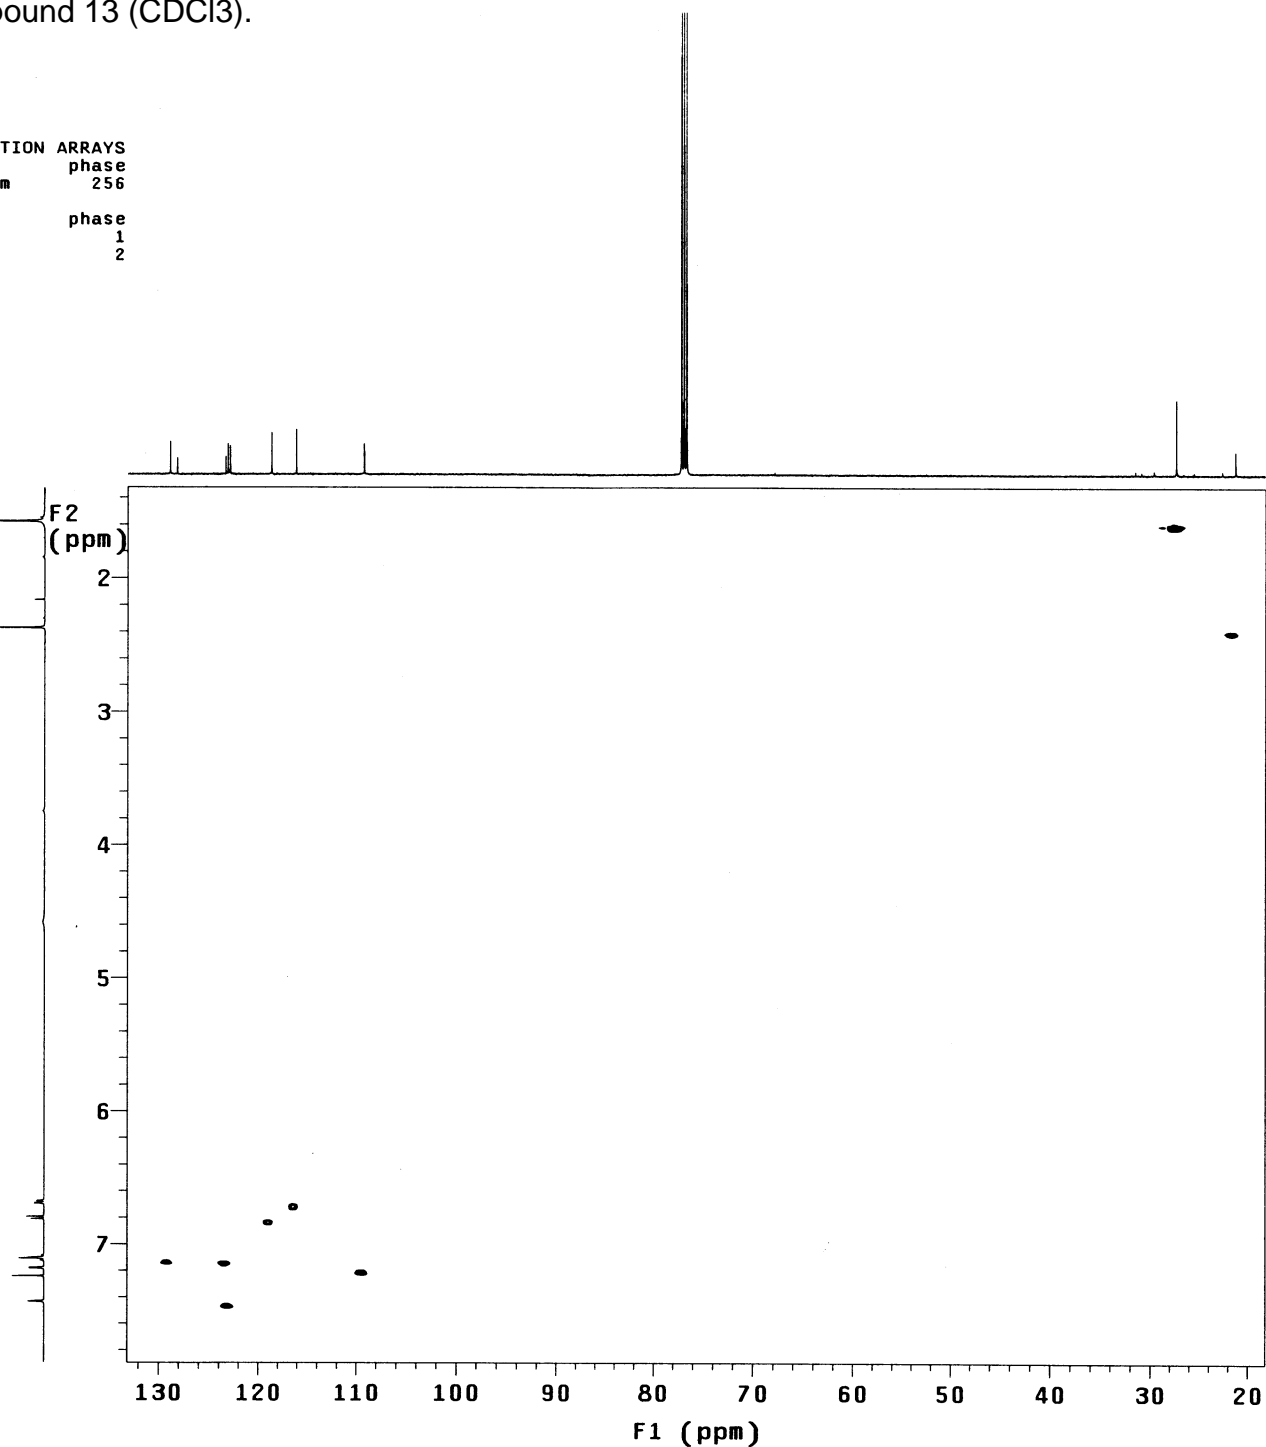

Fig S69. COSY of compound 13 (CDCl<sub>3</sub>).

S69

PMK-01-233

exp15 gCOSY

| SAMPLE         |             | FLAGS         |          |
|----------------|-------------|---------------|----------|
| date           | Nov 30 2009 | hs            | nn       |
| solvent        | cdcl3       | sspul         | n        |
| sample         | undefined   | hsglvl        | 1003     |
| ACQUISITION    |             | SPECIAL       |          |
| sw             | 4001.6      | temp          | not used |
| at             | 0.128       | gain          | 34       |
| np             | 1024        | spin          | 0        |
| fb             | not used    | F2 PROCESSING |          |
| ss             | 16          | sb            | -0.064   |
| d1             | 1.000       | sbs           | not used |
| nt             | 8           | fn            | 1024     |
| 2D ACQUISITION |             | F1 PROCESSING |          |
| sw1            | 4001.6      | sb1           | -0.032   |
| ni             | 128         | sbs1          | not used |
| TRANSMITTER    |             | proc1         |          |
| tn             | H1          | fn1           | 1024     |
| sfrq           | 499.829     | DISPLAY       |          |
| tof            | -250.0      | sp            | 235.9    |
| tpwr           | 58          | wp            | 3993.8   |
| pw             | 11.100      | sp1           | 238.0    |
| GRADIENTS      |             | wp1           |          |
| gzlv11         | 1003        | rfl           | 957.0    |
| gt1            | 0.001000    | rfl1          | 1185.1   |
| gstab          | 0.000500    | rfl1          | 954.9    |
| DECOUPLER      |             | rfl1          |          |
| dn             | C13         | PLOT          |          |
| dm             | nnn         | wc            | 155.0    |
|                |             | sc            | 10.0     |
|                |             | wc2           | 155.0    |
|                |             | sc2           | 0        |
|                |             | vs            | 227      |
|                |             | th            | 5        |
|                |             | ai            | cdc av   |

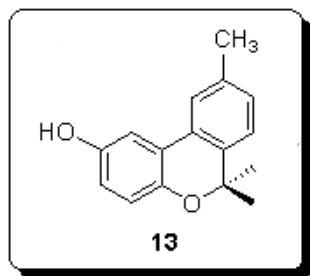F2  
(ppm)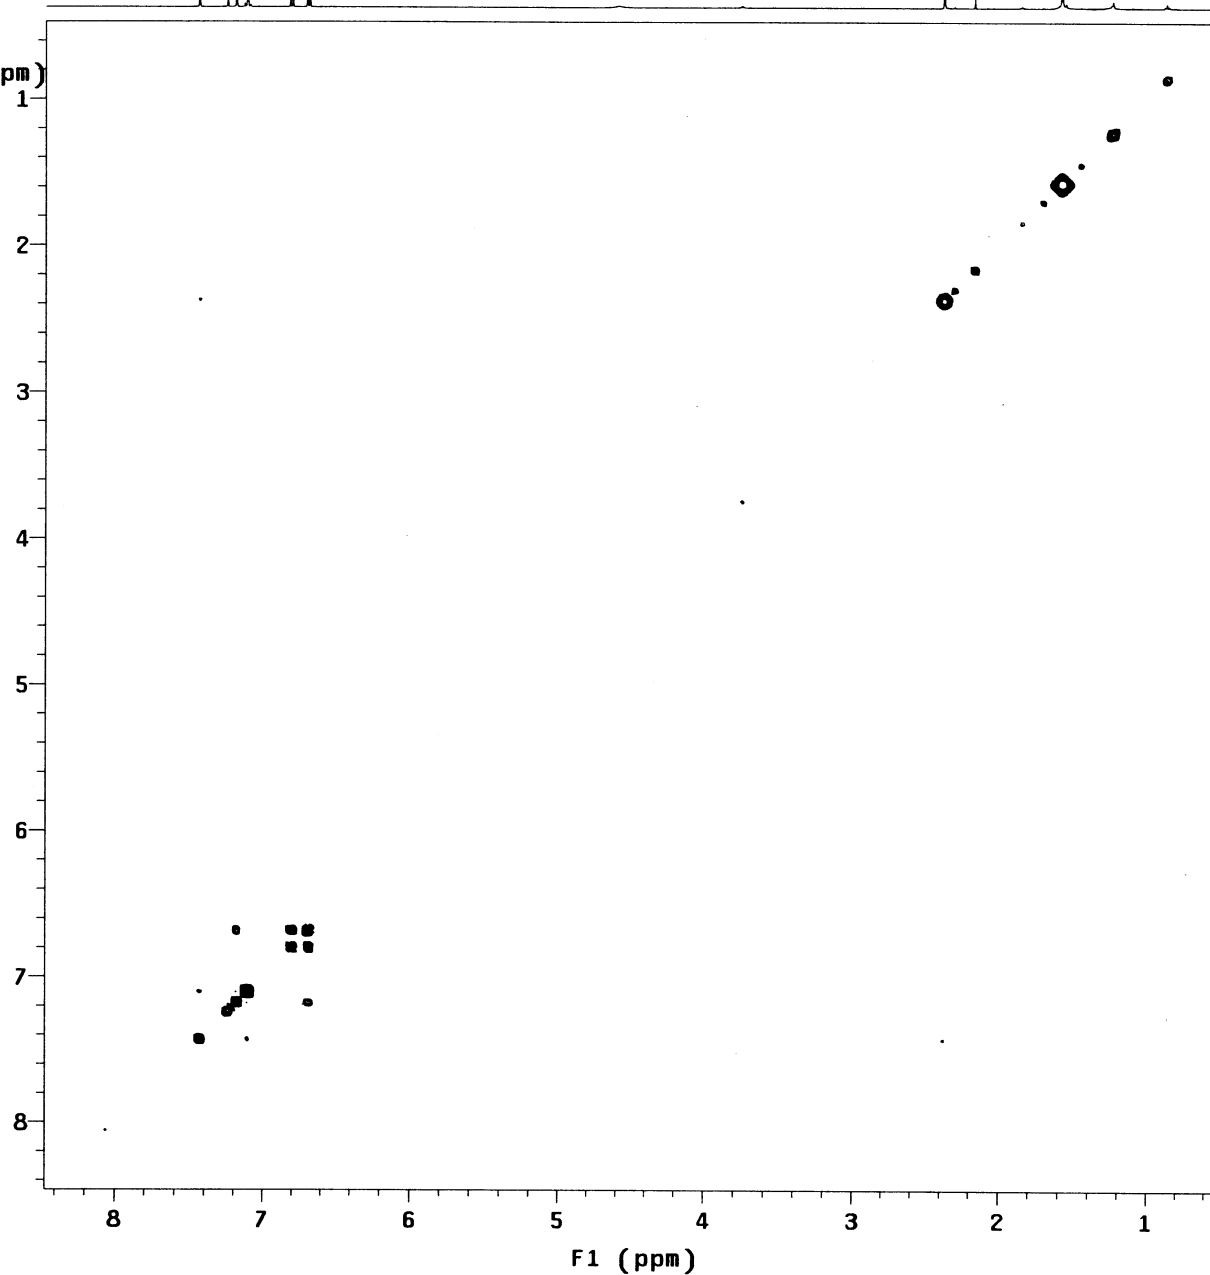

Fig S70. <sup>1</sup>H NMR of compound 14 (500 MHz, CDCl<sub>3</sub>).

S70

PMK-01-209  
exp31 s2pu1

| SAMPLE      |             | DEC. & VT  |          |
|-------------|-------------|------------|----------|
| date        | May 20 2009 | dfrq       | 125.695  |
| solvent     | cdcl3       | dn         | C13      |
| file        | exp         | dpwr       | 30       |
| ACQUISITION |             | dof        | 0        |
| sfrq        | 499.836     | dm         | hnn      |
| tn          | H1          | dmm        | c        |
| at          | 3.000       | dmf        | 200      |
| np          | 48000       | dseq       |          |
| sw          | 8000.0      | dres       | 1.0      |
| fb          | 4000        | homo       | n        |
| bs          |             | PROCESSING |          |
| tpwr        | 57          | wtfile     |          |
| pw          | 4.8         | proc       | ft       |
| d1          | 1.000       | fn         | not used |
| tof         | 499.7       | math       | f        |
| nt          | 4           |            |          |
| ct          | 4           | werr       | react    |
| alock       | y           | wexp       | procplot |
| gain        | not used    | wbs        |          |
| FLAGS       |             | wnt        | wft      |
| il          | n           |            |          |
| in          | n           |            |          |
| dp          | y           |            |          |
| hs          | nn          |            |          |
| DISPLAY     |             |            |          |
| sp          | -250.1      |            |          |
| wp          | 5498.0      |            |          |
| vs          | 60          |            |          |
| sc          | 0           |            |          |
| wc          | 210         |            |          |
| hzmm        | 26.18       |            |          |
| is          | 192.38      |            |          |
| rfl         | 4630.9      |            |          |
| rfp         | 3618.8      |            |          |
| th          | 1           |            |          |
| ins         | 100.000     |            |          |
| nm          | ph          |            |          |

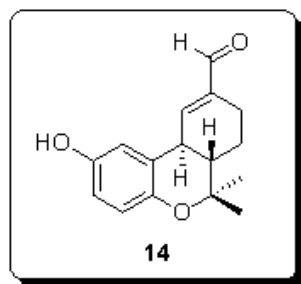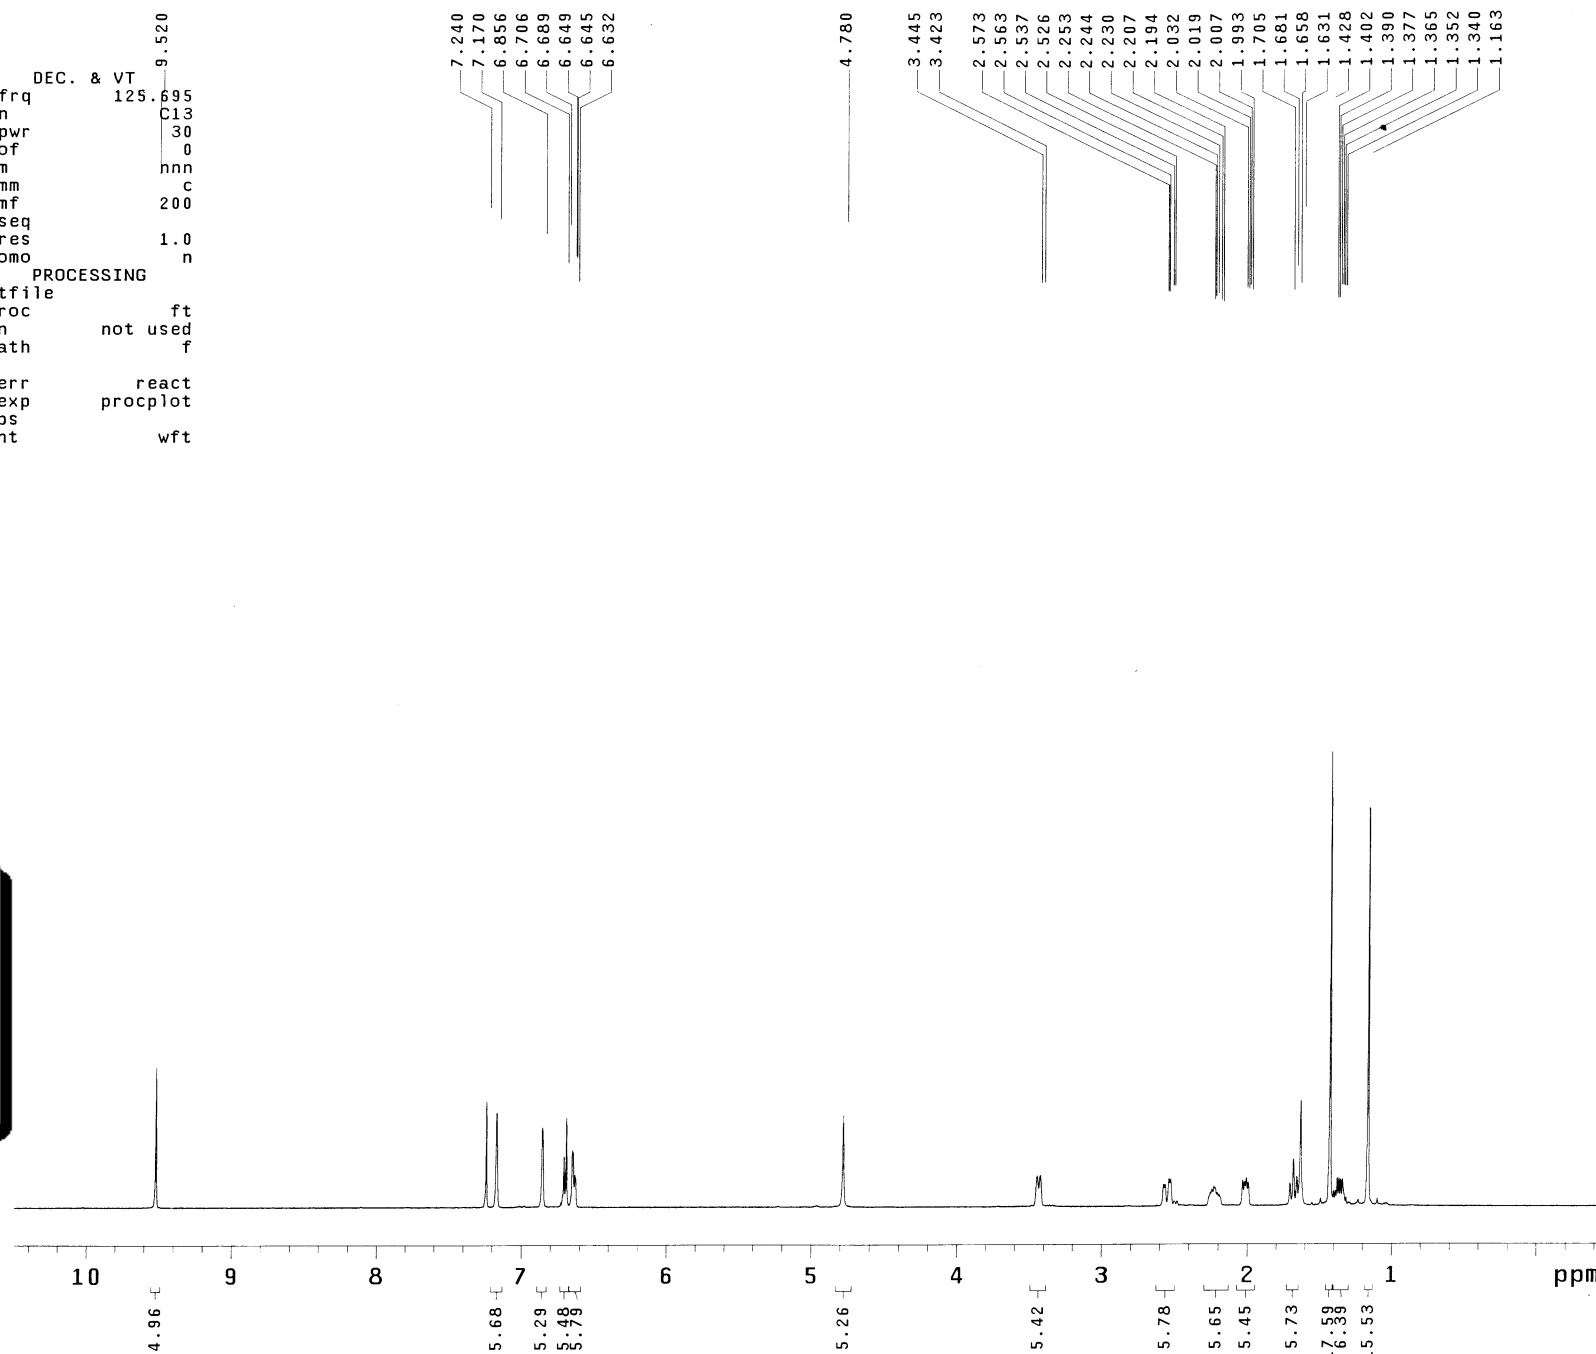

Fig S71. <sup>13</sup>C NMR of compound 14 (125 MHz, CDCl<sub>3</sub>).

S71

PMK-01-209  
exp33 s2pu1

SAMPLE  
date May 20 2009  
solvent cdc13  
file exp

ACQUISITION  
sfrq 125.698  
tn C13  
at 1.000  
np 62894  
sw 31446.5  
fb 17000  
bs 16  
ss 2  
tpwr 54  
pw 4.0  
d1 1.000  
tof 2512.2  
nt 20000  
ct 20000  
alock y  
gain not used

DEC. & VT  
dfrq 499.836  
dn H1  
dpwr 39  
dof 0  
dm yyy  
dmm w  
dmf 11905  
dseq  
dres 1.0  
homo n

PROCESSING  
lb 1.00  
wtfile  
proc ft  
fn not used  
math f  
werr react  
wexp procplot  
wbs testsn  
wnt

FLAGS  
il n  
in n  
dp y  
hs nn

DISPLAY  
sp -1256.9  
wp 27650.1  
vs 145  
sc 0  
wc 210  
hzmm 131.67  
is 500.00  
rfl 10978.7  
rfp 9677.6  
th 6  
ins 100.000  
nm ph

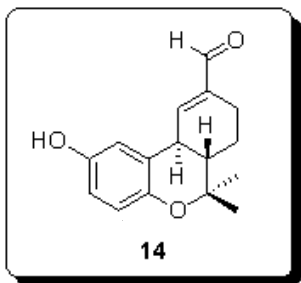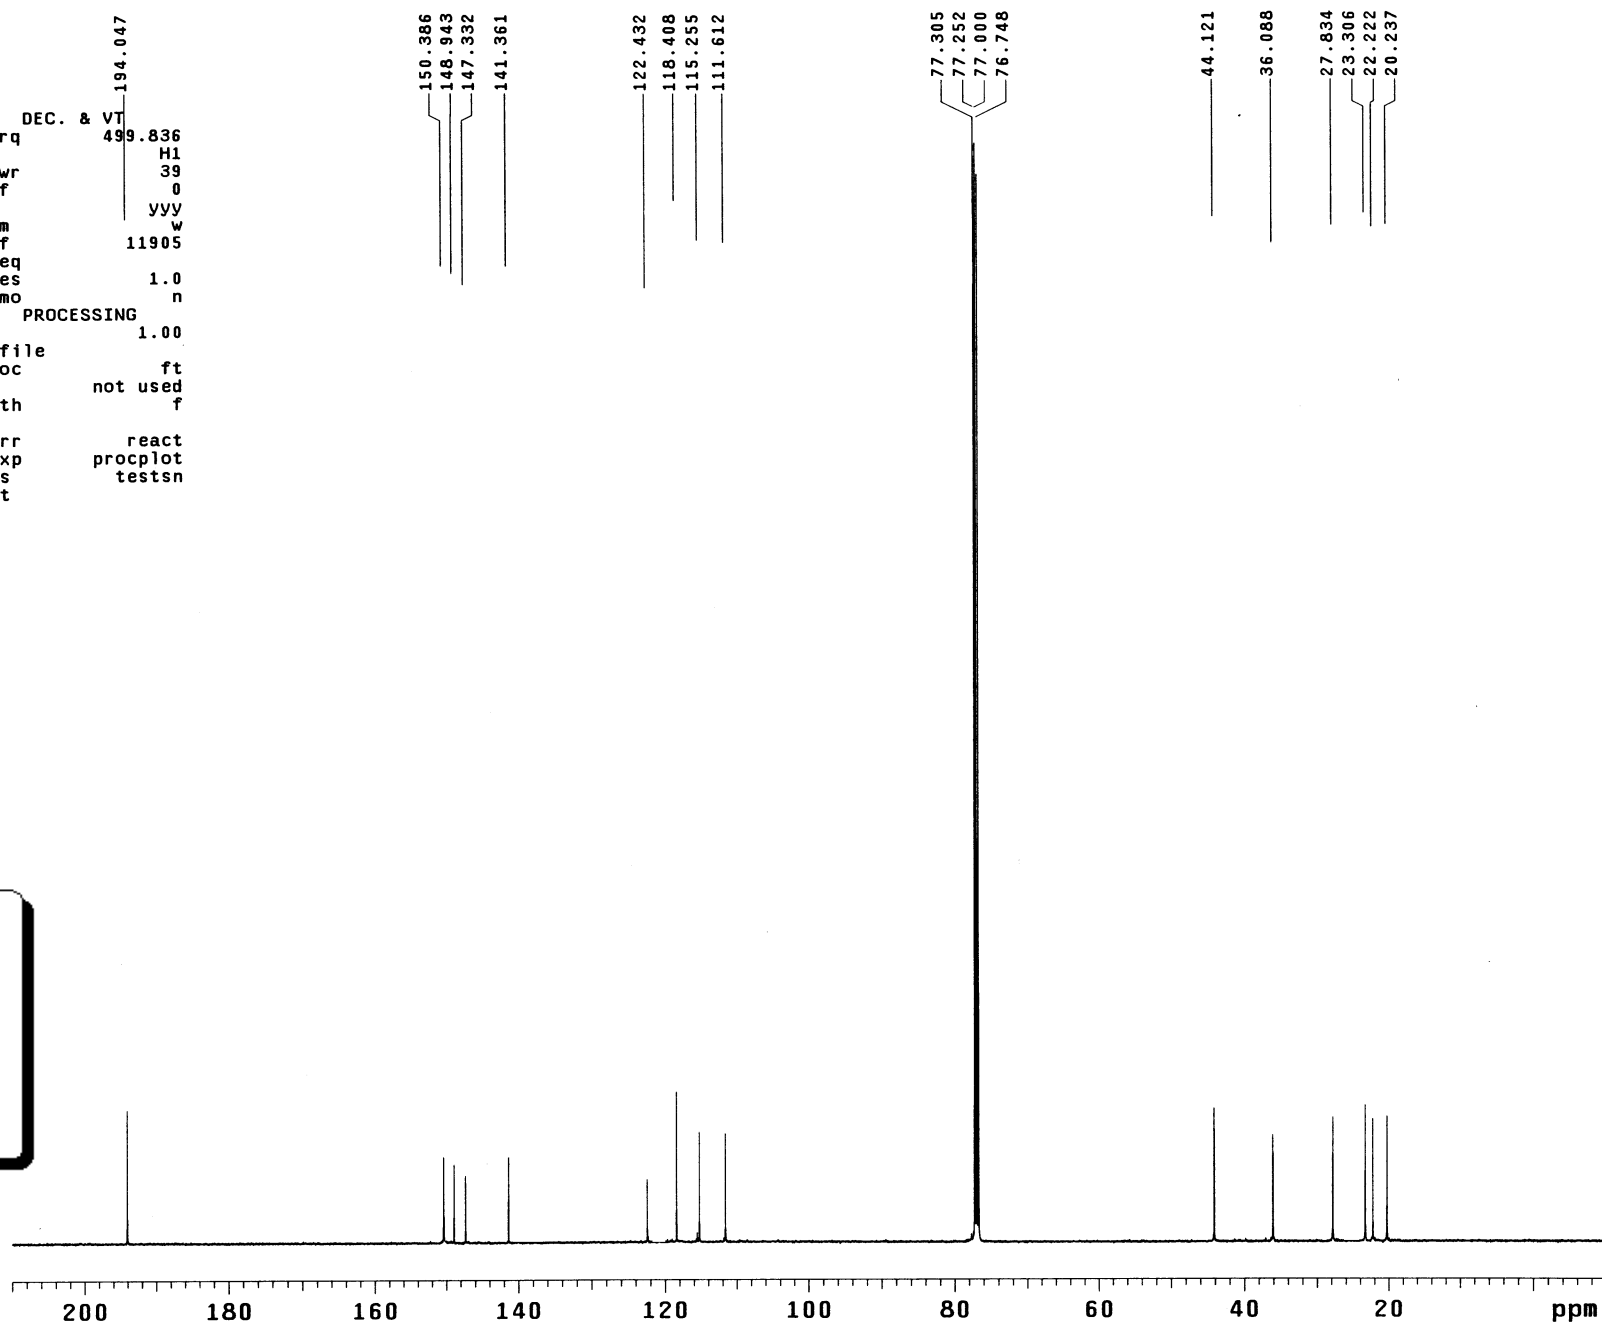

Fig S72. <sup>13</sup>C NMR of compound 14 (125 MHz, CDCl<sub>3</sub>), expanded.

S72

PMK-01-209

exp33 s2pu1

SAMPLE DEC. & VT  
date May 20 2009 dfrq 499.836  
solvent cdcl3 dn H1  
file exp dpwr 39  
ACQUISITION dof 0  
sfrq 125.698 dm yvy  
tn C13 dmm w  
at 1.000 dmf 11905  
np 62894 dseq  
sw 31446.5 dres 1.0  
fb 17000 homo n  
bs 16  
ss 2 PROCESSING lb 1.00  
tpwr 54 wtfile  
pw 4.0 proc ft  
d1 1.000 fn not used  
tof 2512.2 math f  
nt 20000  
ct 20000 werr react  
alock y wexp procplot  
gain not used wbs testsn  
wnt  
FLAGS  
il n  
in n  
dp y  
hs nn  
DISPLAY  
sp 9383.0  
wp 468.3  
vs 81  
sc 0  
wc 210  
hzmm 2.23  
is 500.00  
rfl 10978.7  
rfp 9677.6  
th 6  
ins 100.000  
nm ph

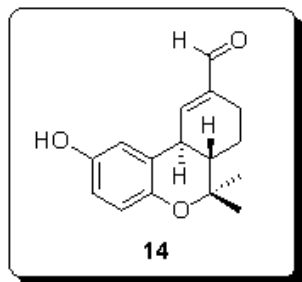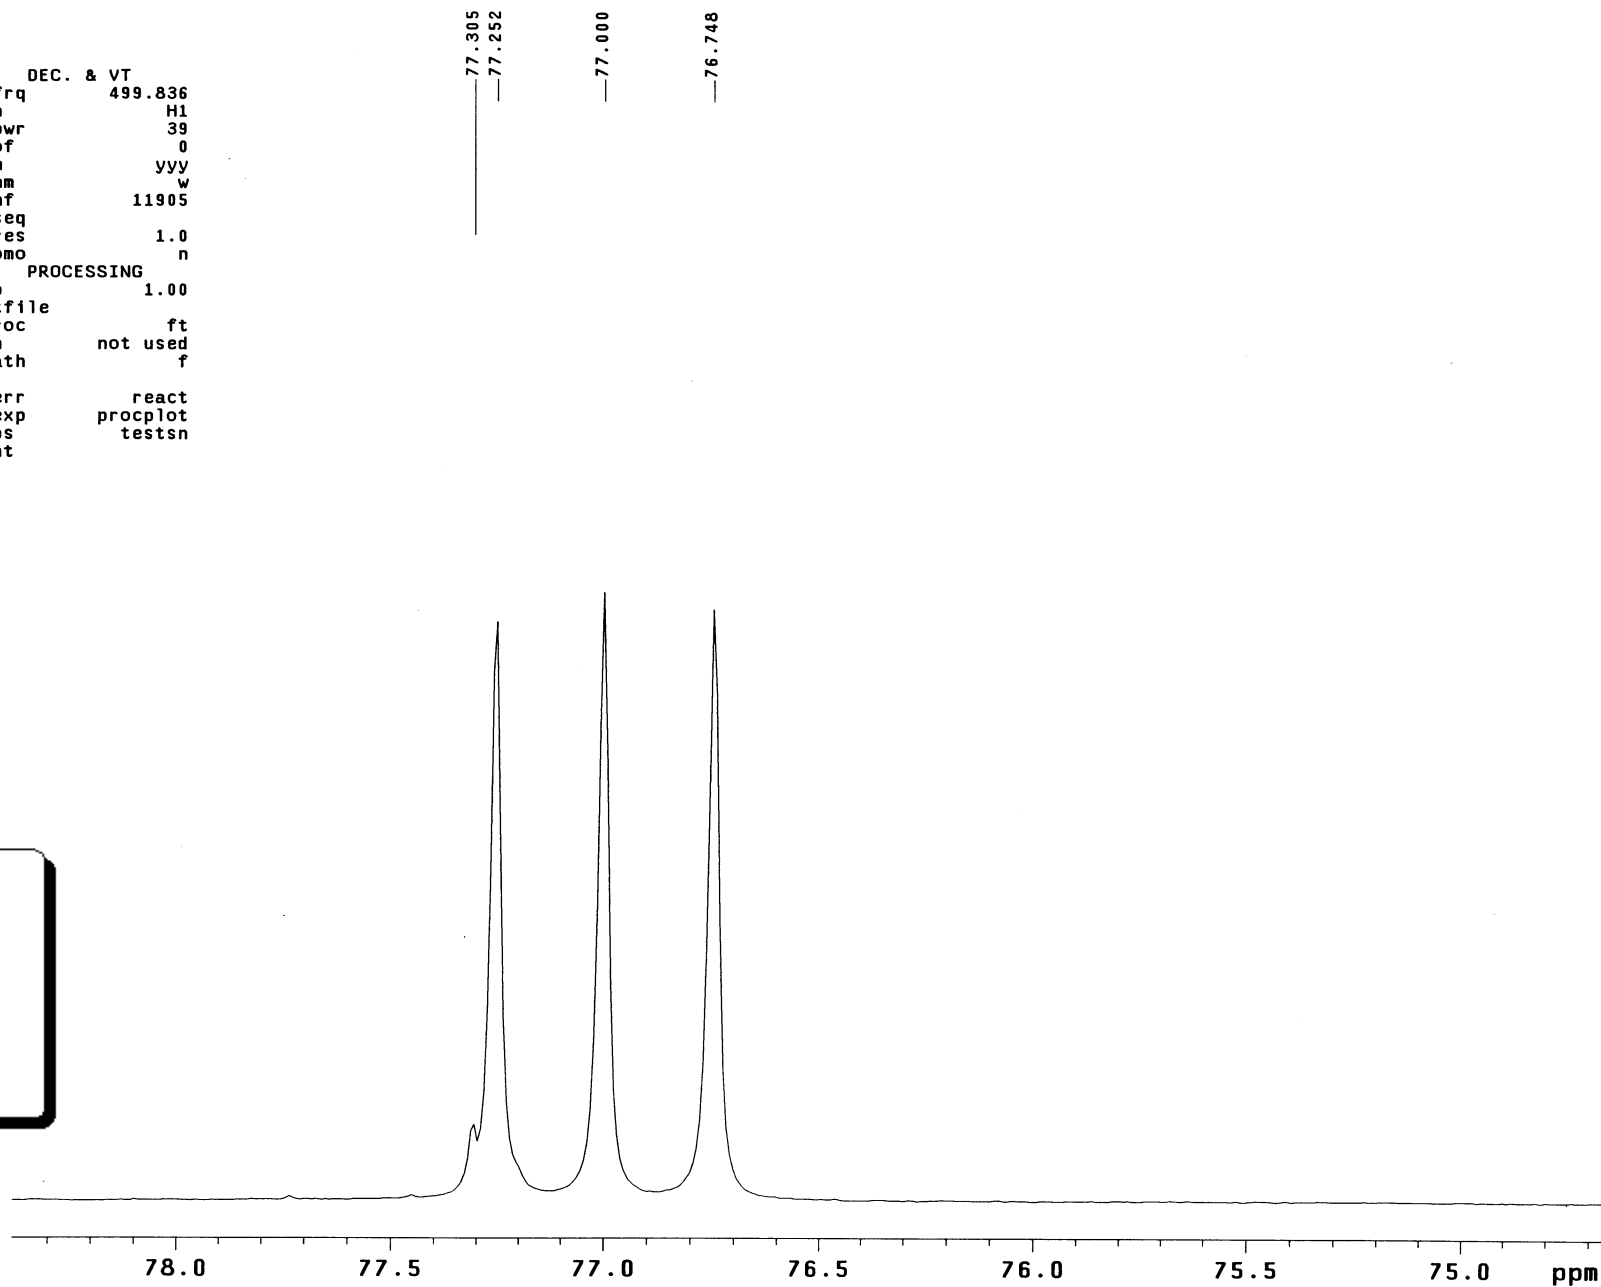

Fig S73. DEPT of compound 14 (CDCl3).

S73

PMK-01-209

exp32 DEPT

| SAMPLE      |             | DEPT       | ACQUISITION ARRAYS |        |
|-------------|-------------|------------|--------------------|--------|
| date        | May 20 2009 | j1xh 140.0 | array              | mult   |
| solvent     | cdcl3       | mult       | arrayed            | 3      |
| sample      | undefined   | SPECIAL    | arraydim           |        |
| ACQUISITION |             | temp       | not used           | i mult |
| sw          | 31446.5     | gain       | 20                 | 1 0.5  |
| at          | 1.000       | spin       | 0                  | 2 1    |
| np          | 62894       | PROCESSING | 3                  | 1.5    |
| bs          | 16          | lb         | 1.00               |        |
| ss          | -4          | fn         | not used           |        |
| d1          | 1.000       | SPECTRUM   |                    |        |
| nt          | 1000        | wp         | 27650.1            |        |
| ct          | 1000        | sp         | -1257.2            |        |
| TRANSMITTER |             | rp         | 33.5               |        |
| tn          | C13         | lp         | 52.4               |        |
| tof         | 2512.2      | ai         | ph                 |        |
| tpwr        | 54          | REFERENCE  |                    |        |
| pw          | 9.400       | rfl        | 1269.7             |        |
| DECOUPLER   |             | rfl        | 0                  |        |
| dn          | H1          | PLOT       |                    |        |
| dof         | 0           | wc         | 210                |        |
| dpwr        | 39          | sc         | 0                  |        |
| dm          | nny         | vs         | 256                |        |
| dmm         | ccw         | hzmm       | 131.67             |        |
| dmf         | 11905       | th         | 68                 |        |
| pp1v1       | 49          |            |                    |        |
| pp          | 29.400      |            |                    |        |

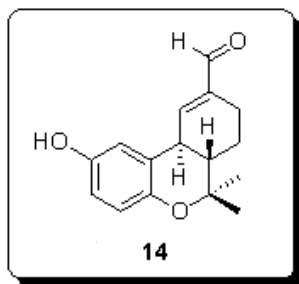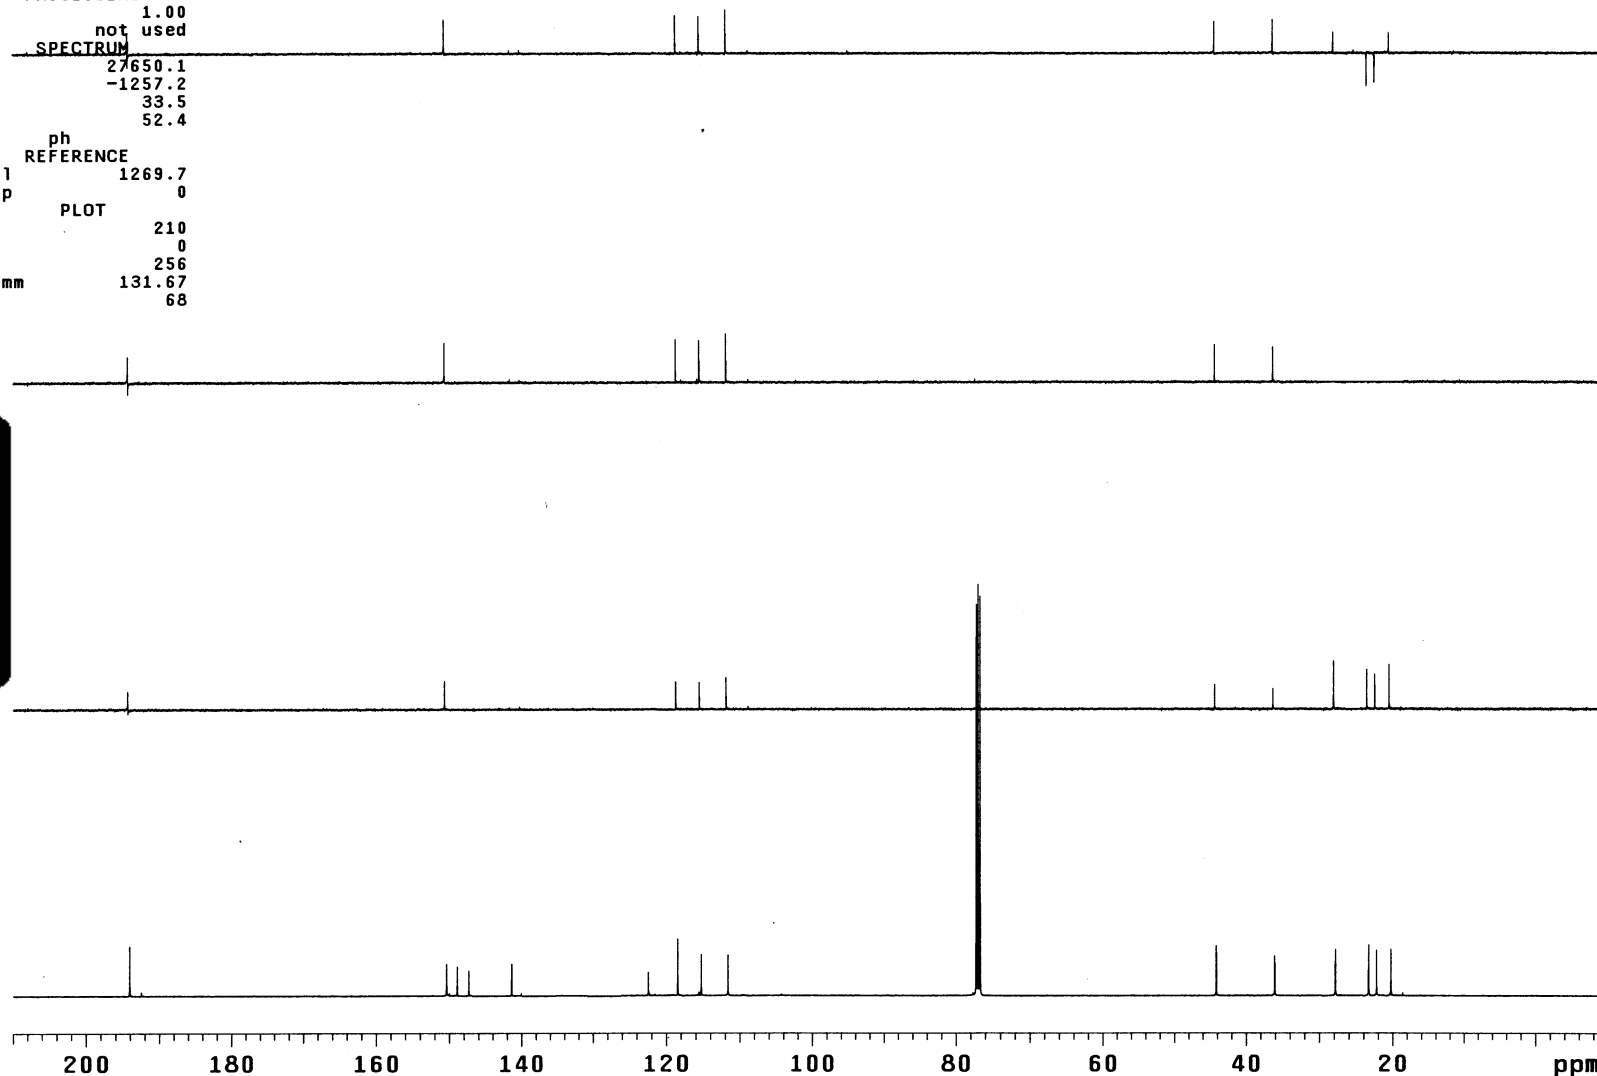

Fig S74. DEPT of compound 14 (CDCl<sub>3</sub>), expanded.

S74

PMK-01-209

exp32 DEPT

| SAMPLE      |             | DEPT       | ACQUISITION ARRAYS |       |
|-------------|-------------|------------|--------------------|-------|
| date        | May 20 2009 | j1xh       | 140.0              | array |
| solvent     | cdcl3       | mult       | arrayed            | mult  |
| sample      | undefined   |            | arraydim           | 3     |
| ACQUISITION |             | SPECIAL    |                    |       |
| sw          | 31446.5     | temp       | not used           | i     |
| at          | 1.000       | gain       | 20                 | 1     |
| np          | 62894       | spin       | 0                  | 2     |
| bs          | 16          | PROCESSING | 3                  | 1.5   |
| ss          | -4          | lb         | 1.00               |       |
| d1          | 1.000       | fn         | not used           |       |
| nt          | 1000        | SPECTRUM   |                    |       |
| ct          | 1000        | wp         | 3142.0             |       |
| TRANSMITTER |             | sp         | 7540.1             |       |
| tn          | C13         | rp         | 33.5               |       |
| tof         | 2512.2      | lp         | 52.4               |       |
| tpwr        | 54          | ai         | ph                 |       |
| pw          | 9.400       | REFERENCE  |                    |       |
| DECOUPLER   |             | rfl        | 1269.7             |       |
| dn          | H1          | rtp        | 0                  |       |
| dof         | 0           | PLOT       |                    |       |
| dpwr        | 39          | wc         | 210                |       |
| dm          | nny         | sc         | 0                  |       |
| dmm         | ccw         | vs         | 256                |       |
| dmf         | 11905       | hzmm       | 14.96              |       |
| pplv1       | 49          | th         | 68                 |       |
| pp          | 29.400      |            |                    |       |

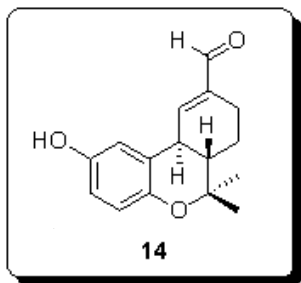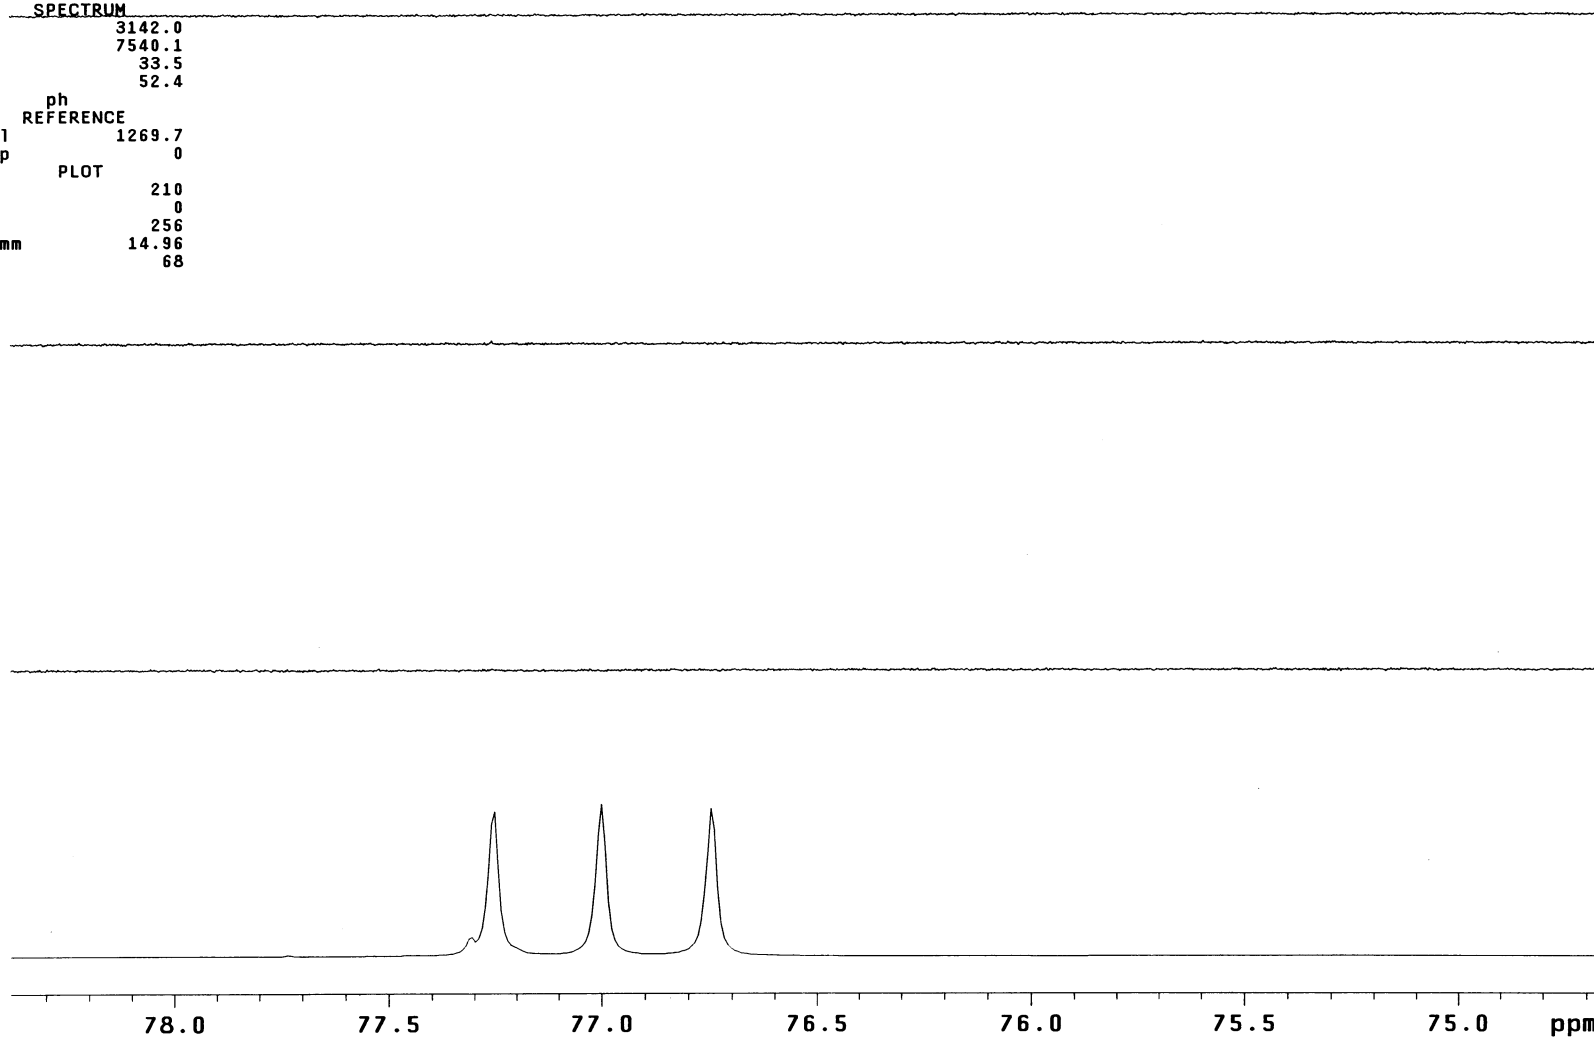

Fig S75. HMQC of compound 14 (CDCl<sub>3</sub>).

S75

PMK-01-209

exp35 gHMQC

| SAMPLE         |             | FLAGS         | ACQUISITION |          | ARRAYS |
|----------------|-------------|---------------|-------------|----------|--------|
| date           | May 20 2009 | hs            | n           | array    | phase  |
| solvent        | cdcl3       | sspul         | y           | arraydim | 256    |
| sample         | undefined   | PFGflg        | y           |          |        |
| ACQUISITION    |             | hsglv1        | 1026        | i        | phase  |
| sw             | 4498.4      | SPECIAL       | 1           | 1        | 1      |
| at             | 0.228       | temp          | not used    | 2        | 2      |
| np             | 2048        | gain          | 44          |          |        |
| fb             | 3000        | spin          | 0           |          |        |
| ss             | 32          | GRADIENTS     |             |          |        |
| d1             | 1.000       | gzlv11        | 1026        |          |        |
| nt             | 16          | gt1           | 0.001000    |          |        |
| 2D ACQUISITION |             | gzlv13        | 516         |          |        |
| sw1            | 21367.5     | gt3           | 0.001000    |          |        |
| ni             | 128         | gstab         | 0.000500    |          |        |
| phase          | arrayed     | F2 PROCESSING |             |          |        |
| TRANSMITTER    |             | gf            | 0.105       |          |        |
| tn             | H1          | gfs           | not used    |          |        |
| sfrq           | 499.836     | fn            | 2048        |          |        |
|                |             | F1 PROCESSING |             |          |        |
| tof            | 249.8       | gf1           | 0.006       |          |        |
| tpwr           | 57          | gfs1          | not used    |          |        |
| pw             | 13.000      | proc1         | 1p          |          |        |
| DECOUPLER      |             | fn1           | 2048        |          |        |
| dn             | C13         | DISPLAY       |             |          |        |
| dof            | -2515.1     | sp            | 526.2       |          |        |
| dm             | nnv         | wp            | 3400.2      |          |        |
| dmm            | ccp         | sp1           | 1851.6      |          |        |
| dmf            | 32258       | wp1           | 17882.8     |          |        |
| dpwr           | 35          | rfl           | -499.8      |          |        |
| pwxlvl         | 51          | rfp           | 0           |          |        |
| pw             | 14.700      | rfl1          | 1257.5      |          |        |
| HMQC           |             | rflp1         | 0           |          |        |
| j1xh           | 140.0       | PLOT          |             |          |        |
| nullflg        | y           | wc            | 150.0       |          |        |
|                |             | sc            | 6.2         |          |        |
|                |             | wc2           | 116.2       |          |        |
|                |             | sc2           | 0           |          |        |
|                |             | vs            | 227         |          |        |
|                |             | th            | 4           |          |        |
|                |             | ai            | cdc         |          |        |
|                |             |               | ph          |          |        |

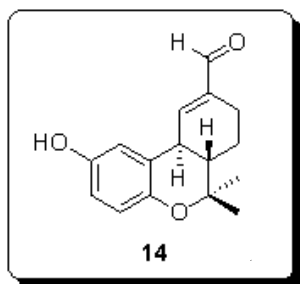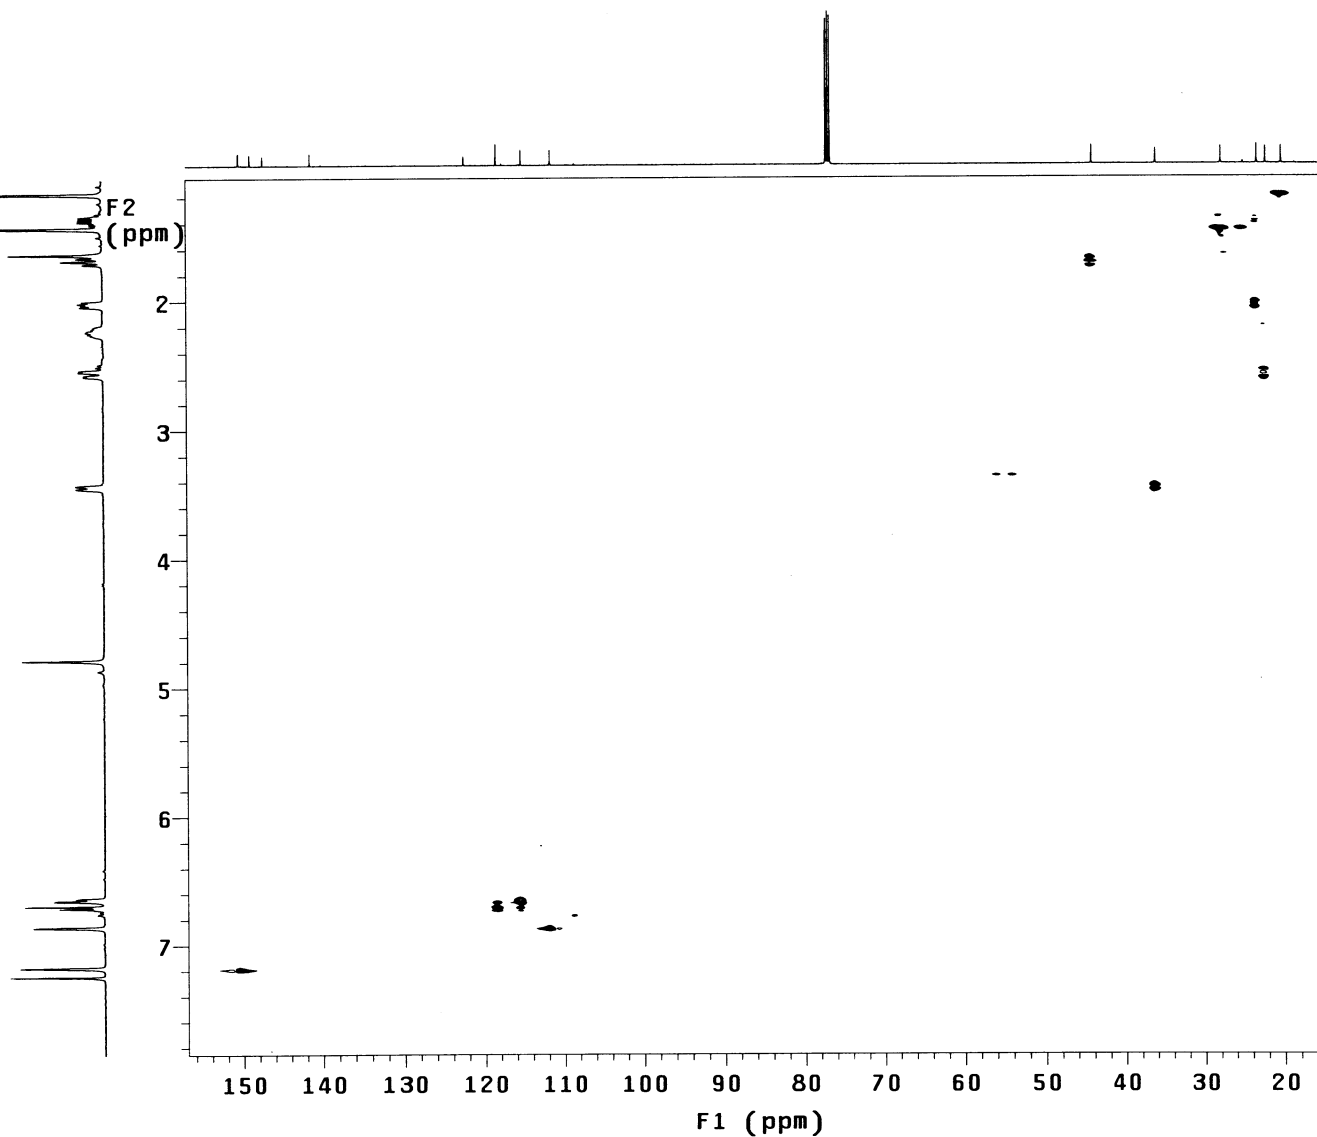

Fig S76. COSY of compound 14 (CDCl<sub>3</sub>).

S76

PMK-01-209

exp34 gCOSY

| SAMPLE         |             | FLAGS         |          |
|----------------|-------------|---------------|----------|
| date           | May 20 2009 | hs            | nn       |
| solvent        | cdcl3       | sspul         | n        |
| sample         | undefined   | hsglv1        | 1026     |
| ACQUISITION    |             | SPECIAL       |          |
| sw             | 4498.4      | temp          | not used |
| at             | 0.228       | gain          | 44       |
| np             | 2048        | spin          | 0        |
| fb             | 3000        | F2 PROCESSING |          |
| ss             | 16          | sb            | -0.114   |
| d1             | 1.000       | sbs           | not used |
| nt             | 16          | fn            | 2048     |
| 2D ACQUISITION |             | F1 PROCESSING |          |
| sw1            | 4498.4      | sb1           | -0.028   |
| ni             | 128         | sbs1          | not used |
| TRANSMITTER    |             | proc1         | lp       |
| tn             | H1          | fn1           | 2048     |
| sfrq           | 499.836     | DISPLAY       |          |
| tof            | 249.8       | sp            | 489.1    |
| tpwr           | 57          | wp            | 4494.0   |
| pw             | 13.000      | sp1           | 491.5    |
| GRADIENTS      |             | wp1           | 4494.0   |
| gzlv11         | 1026        | rfl           | 3134.1   |
| gt1            | 0.001000    | rfp           | 3618.8   |
| gstab          | 0.000500    | rfl1          | 3131.7   |
| DECOUPLER      |             | rfp1          | 3618.8   |
| dn             | C13         | PLOT          |          |
| dm             | nnn         | wc            | 155.0    |
|                |             | sc            | 10.0     |
|                |             | wc2           | 155.0    |
|                |             | sc2           | 0        |
|                |             | vs            | 1814     |
|                |             | th            | 5        |
|                |             | ai            | cdc av   |

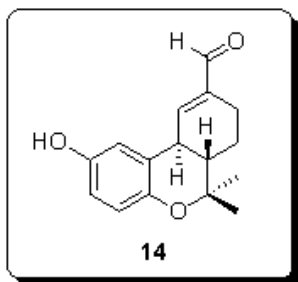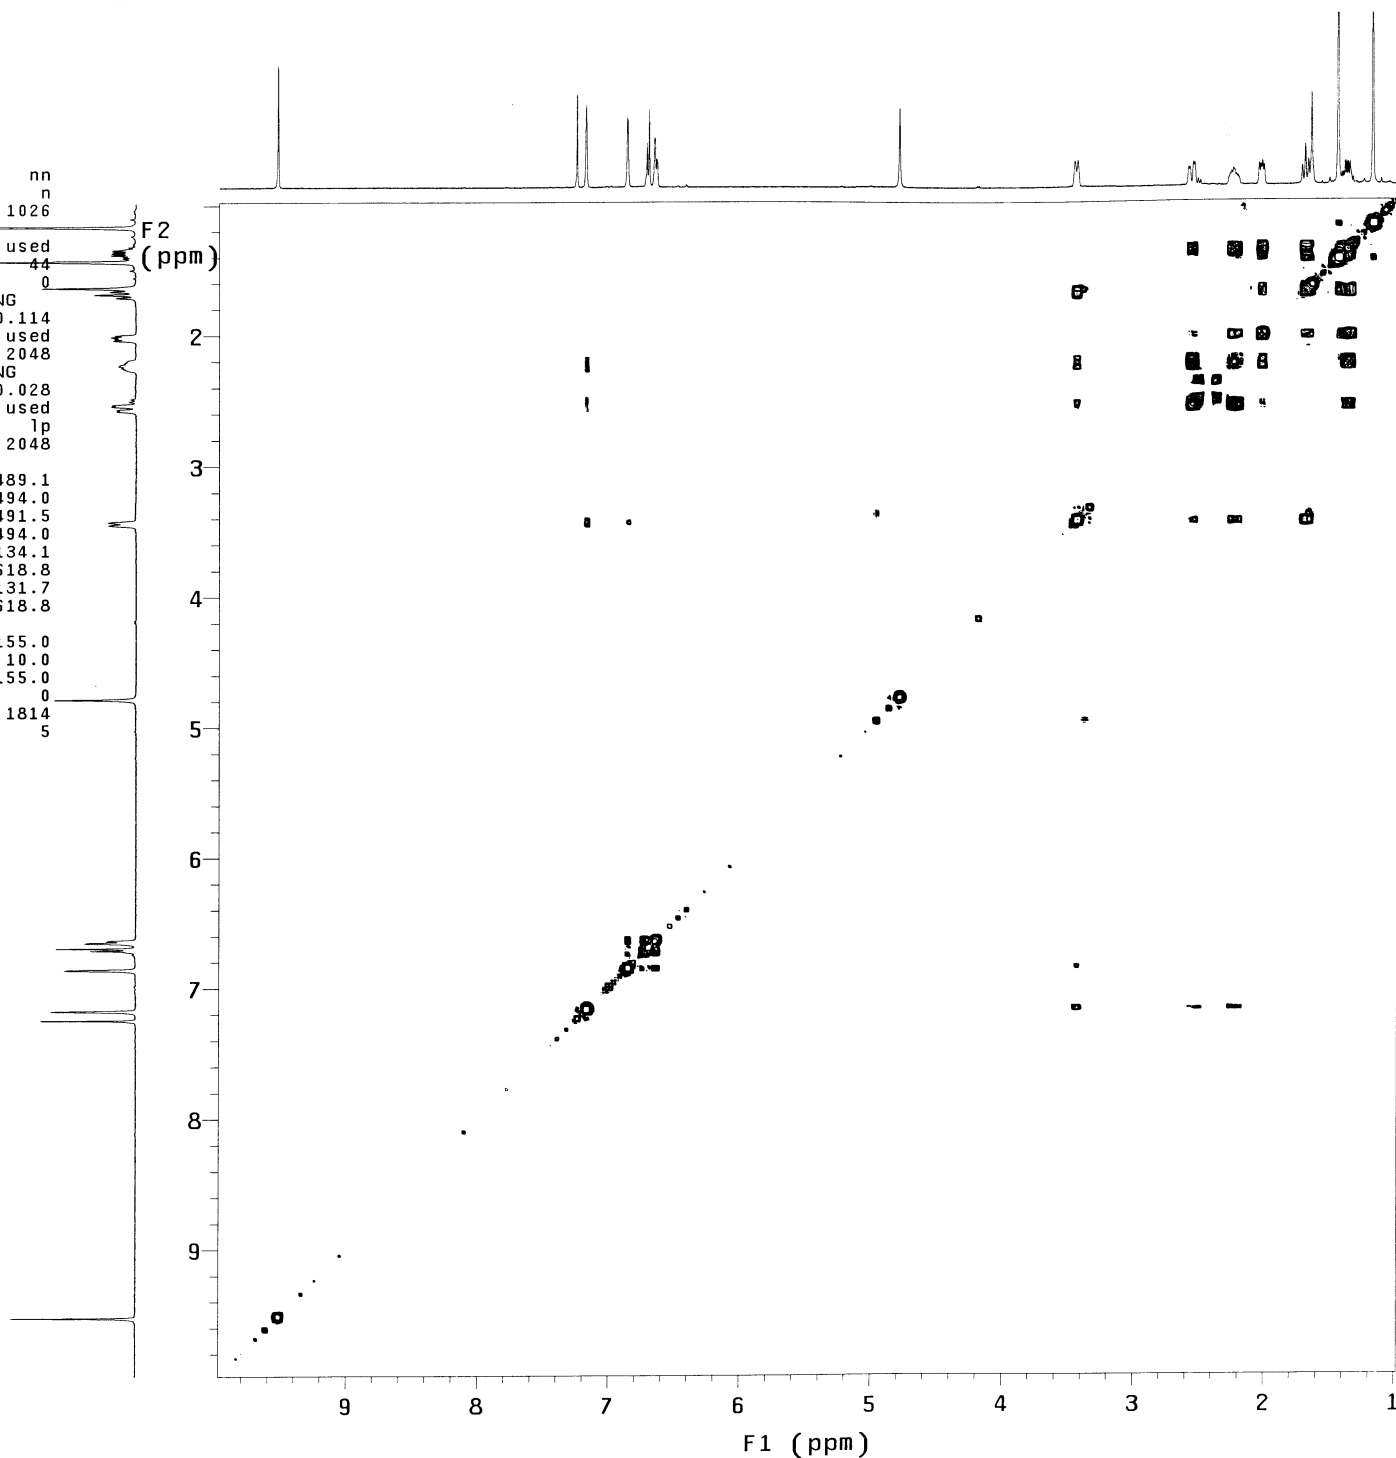

Fig S77. NOESY of compound 14 (CDCl<sub>3</sub>).

S77

PMK-01-209  
exp36 NOESY

| SAMPLE         |             | FLAGS         |          |
|----------------|-------------|---------------|----------|
| date           | May 20 2009 | hs            | n        |
| solvent        | cdcl3       | sspul         | y        |
| sample         | undefined   | PFGflg        | y        |
| ACQUISITION    |             | hsglvl        | 1026     |
| sw             | 4498.4      | SPECIAL       |          |
| at             | 0.228       | temp          | not used |
| np             | 2048        | gain          | 44       |
| fb             | 3000        | spin          | 0        |
| ss             | 32          | F2 PROCESSING |          |
| d1             | 1.000       | gf            | 0.105    |
| nt             | 8           | gfs           | not used |
| 2D ACQUISITION |             | fn            | 2048     |
| sw1            | 4498.4      | F1 PROCESSING |          |
| ni             | 200         | gf1           | 0.041    |
| TRANSMITTER    |             | gfs1          | not used |
| tn             | H1          | proc1         | lp       |
| sfrq           | 499.836     | fn1           | 2048     |
| tof            | 249.8       | DISPLAY       |          |
| tpwr           | 57          | sp            | 490.6    |
| pw             | 13.000      | wp            | 4494.0   |
| NOESY          |             | sp1           | 491.5    |
| mix            | 0.600       | wp1           | 4494.0   |
| PRESATURATION  |             | rfl           | 3132.6   |
| satmode        | nnnn        | rfp           | 3618.8   |
| satpwr         | 0           | rfl1          | 3131.6   |
| satdly         | 0           | rfp1          | 3618.8   |
| satfrq         | 0           | PLOT          |          |
| DECOUPLER      |             | wc            | 155.0    |
| dn             | C13         | sc            | 10.0     |
| dm             | nnn         | wc2           | 155.0    |
|                |             | sc2           | 0        |
|                |             | vs            | 1814     |
|                |             | th            | 1        |
|                |             | ai            | ph       |

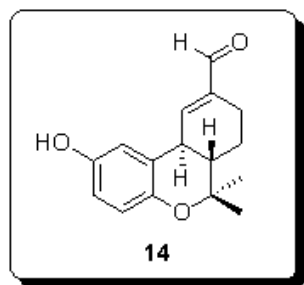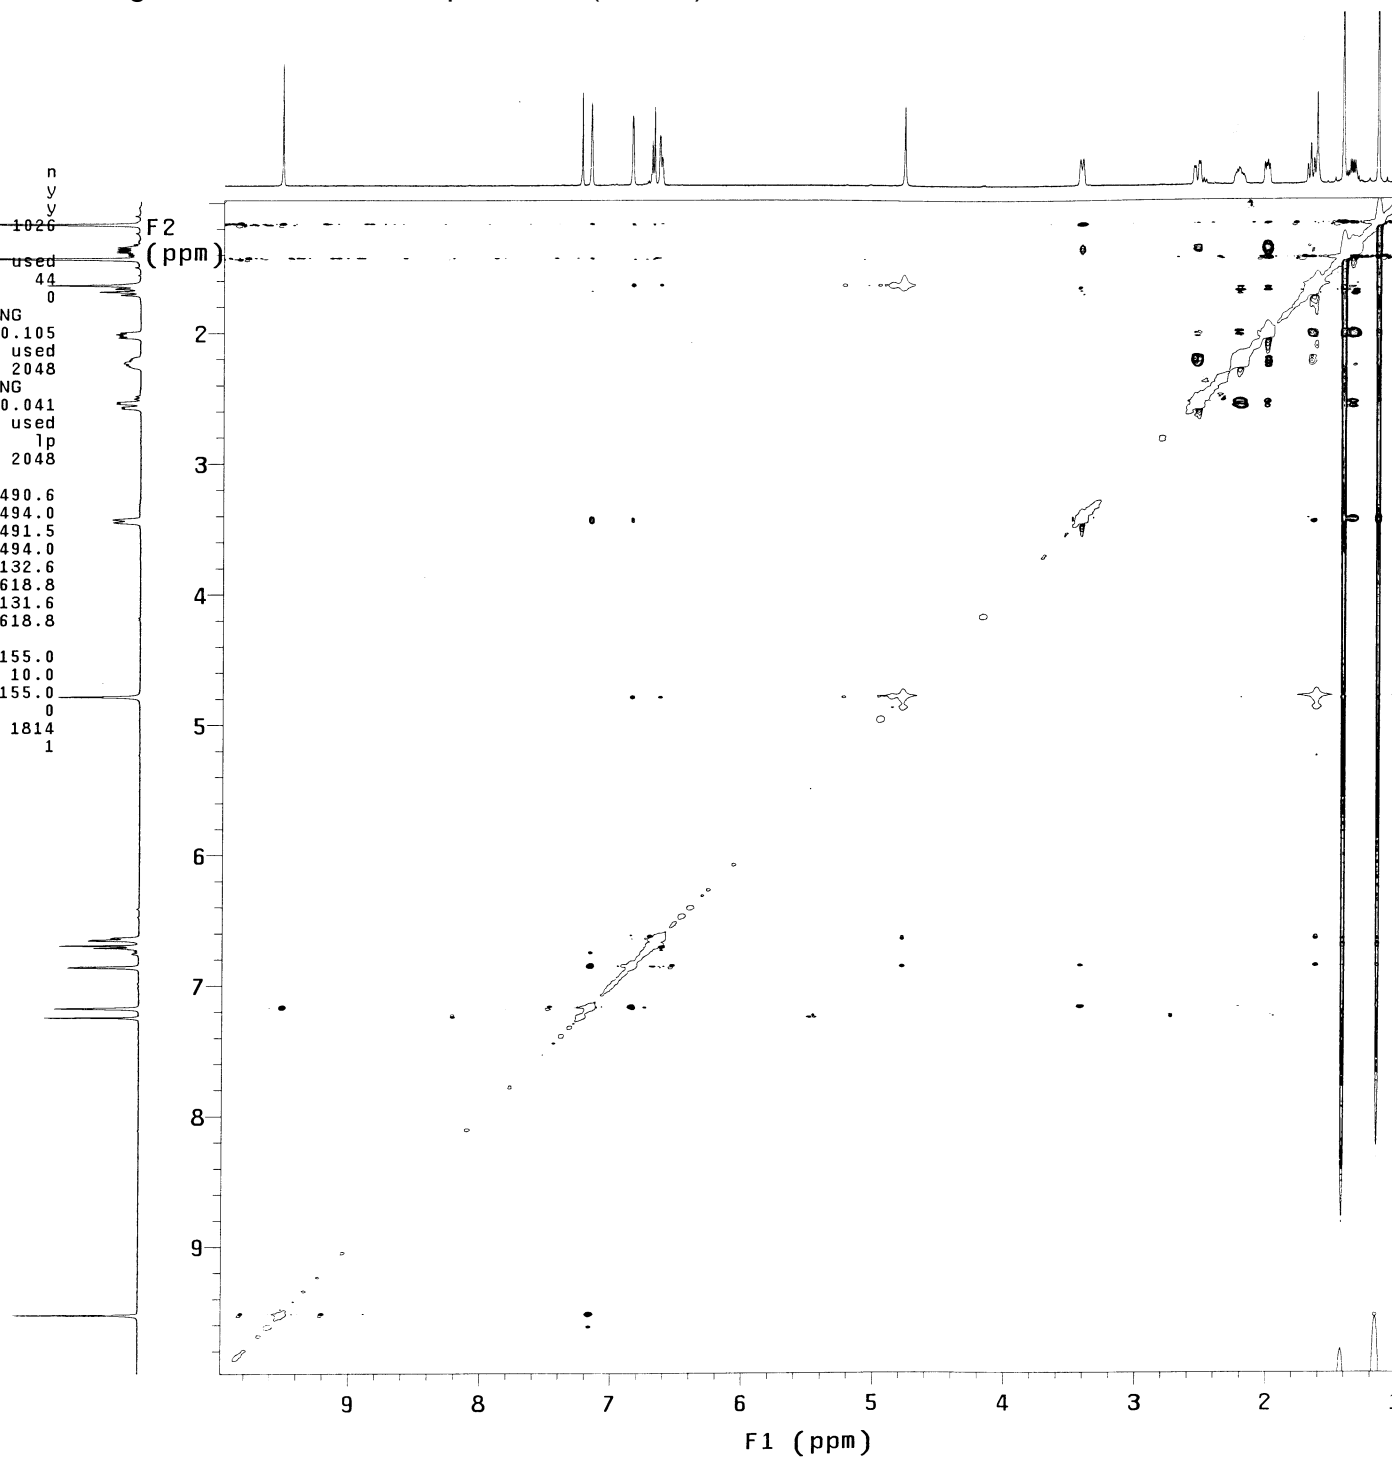

Fig S78. NOESY of compound 14 (CDCl<sub>3</sub>).

S78

PMK-01-209

exp3 NOESY

| SAMPLE         |             | FLAGS         |          |
|----------------|-------------|---------------|----------|
| date           | May 21 2009 | hs            | n        |
| solvent        | cdcl3       | sspul         | y        |
| sample         | undefined   | PFGflg        | y        |
| ACQUISITION    |             | hsglvi        | 1026     |
| sw             | 4498.4      | SPECIAL       |          |
| at             | 0.228       | temp          | not used |
| np             | 2048        | gain          | 44       |
| fb             | 3000        | spin          | 0        |
| ss             | 32          | F2 PROCESSING |          |
| d1             | 1.000       | gf            | 0.105    |
| nt             | 8           | gfs           | not used |
| 2D ACQUISITION |             | fn            | 2048     |
| sw1            | 4498.4      | F1 PROCESSING |          |
| ni             | 400         | gf1           | 0.041    |
| TRANSMITTER    |             | gfs1          | not used |
| tn             | H1          | fn1           | 2048     |
| sfrq           | 499.836     | DISPLAY       |          |
| tof            | 249.8       | sp            | 489.4    |
| tpwr           | 57          | wp            | 4349.1   |
| pw             | 13.000      | sp1           | 501.0    |
| NOESY          |             | wp1           | 4344.7   |
| mix            | 0.600       | rfl           | 1917.4   |
| PRESATURATION  |             | rfp           | 2389.2   |
| satmode        | nnnn        | rfl1          | 1901.4   |
| satpwr         | 0           | rfp1          | 2389.2   |
| satdly         | 0           | PLOT          |          |
| satfrq         | 0           | wc            | 155.0    |
| DECOUPLER      |             | sc            | 10.0     |
| dn             | C13         | wc2           | 155.0    |
| dm             | nnn         | sc2           | 0        |
|                |             | vs            | 113      |
|                |             | th            | 1        |
|                |             | ai            | ph       |

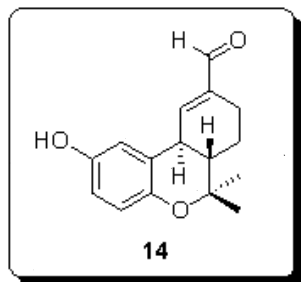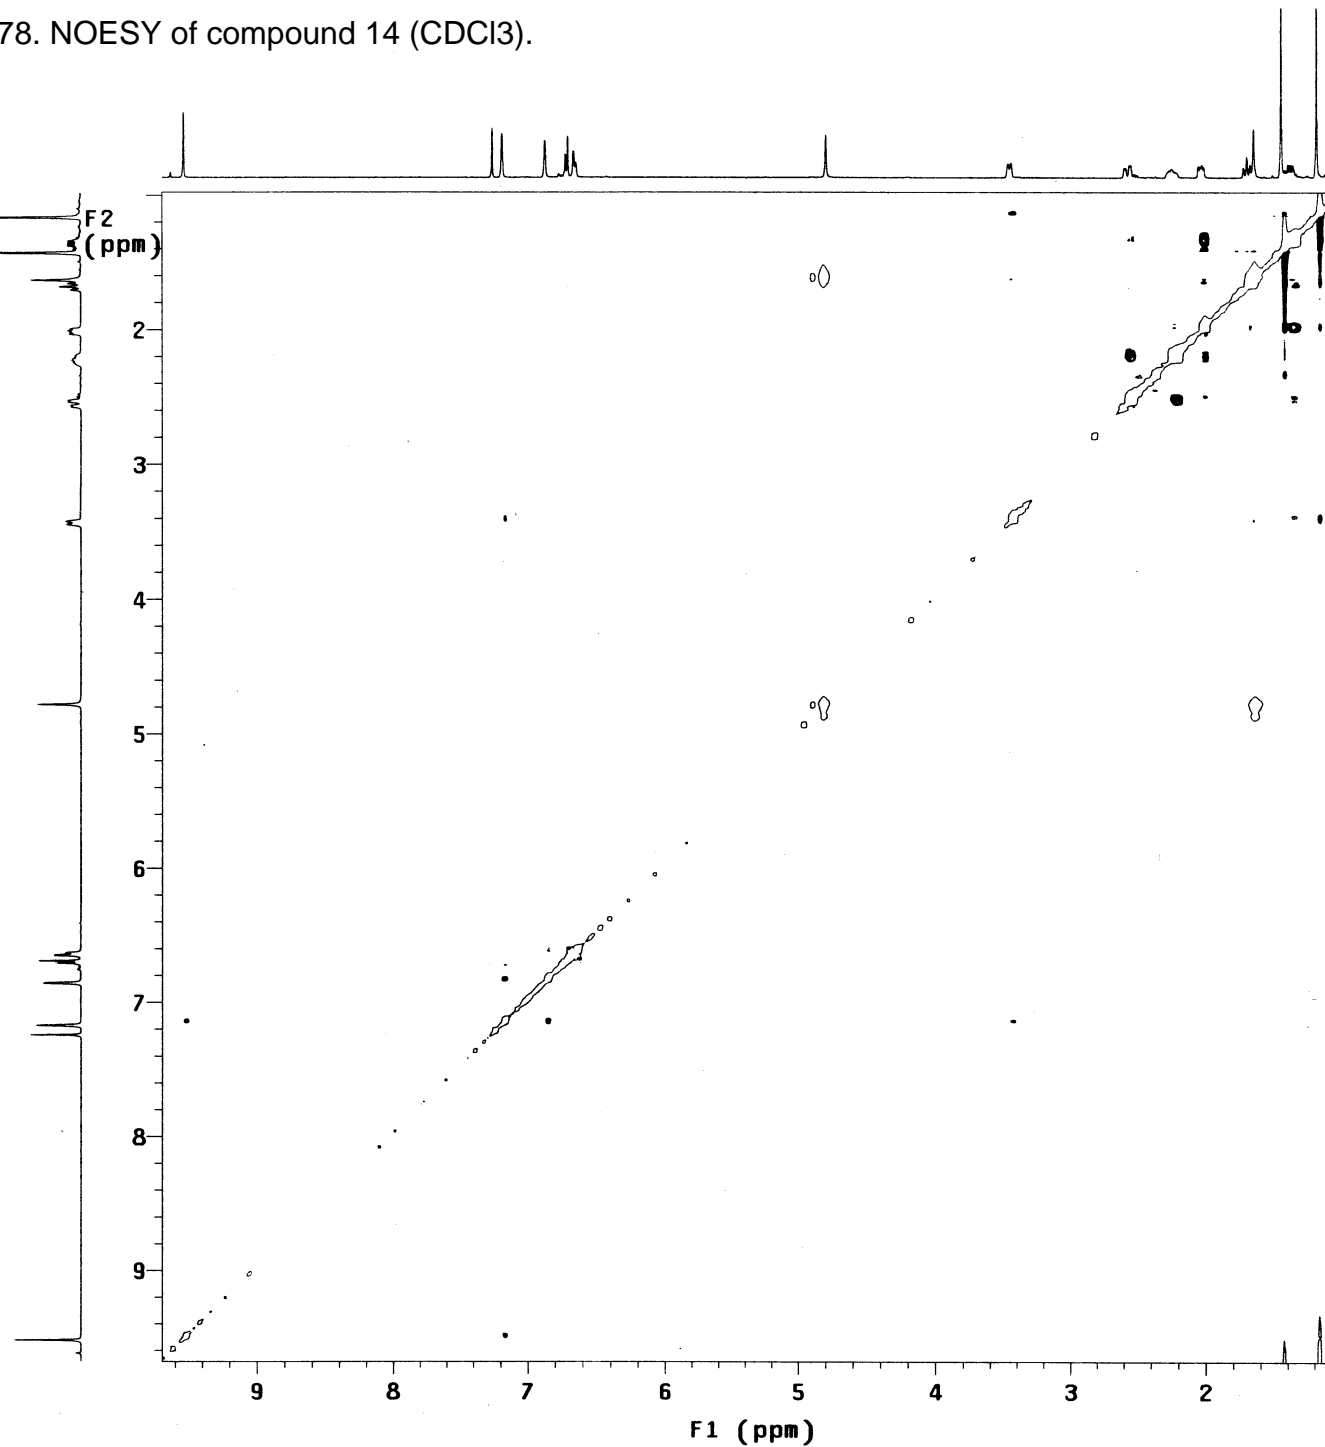

Fig S79. <sup>1</sup>H NMR of compound 15 (400 MHz, C<sub>6</sub>D<sub>6</sub>).

S79

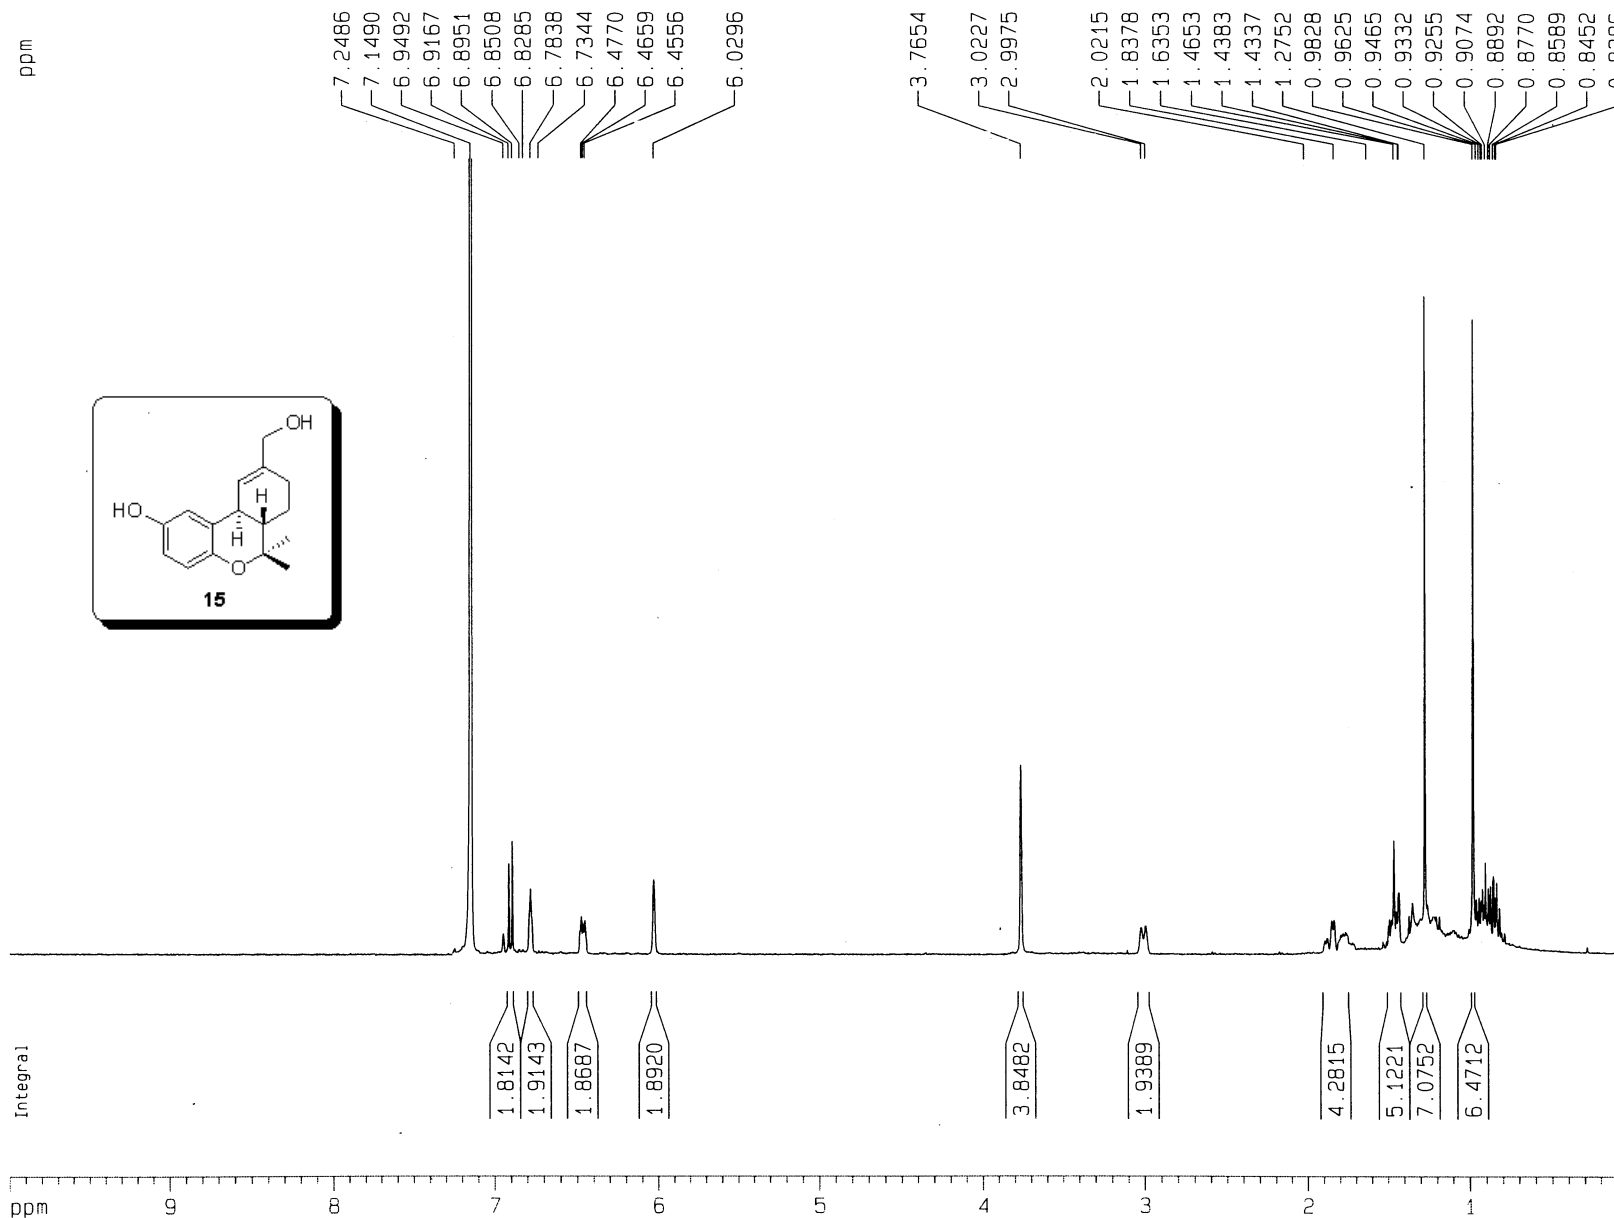

Current Data Parameters  
NAME PMK-01-262  
EXPNO 1  
PROCNO 1

F2 - Acquisition Parameters  
Date\_ 20090921  
Time 23.29  
INSTRUM spect  
PROBHD 5 mm GNP 1H  
PULPROG zg30  
TD 16384  
SOLVENT C6D6  
NS 16  
DS 0  
SWH 5995.204 Hz  
FIDRES 0.365918 Hz  
AQ 1.3664756 sec  
RG 1448.2  
DW 83.400 usec  
DE 6.50 usec  
TE 300.0 K  
D1 1.50000000 sec

===== CHANNEL f1 =====  
NUC1 1H  
P1 10.90 usec  
PL1 -3.00 dB  
SF01 400.1326008 MHz

F2 - Processing parameters  
SI 8192  
SF 400.1300495 MHz  
WDW EM  
SSB 0  
LB 0.10 Hz  
GB 0  
PC 1.00

1D NMR plot parameters  
CX 21.50 cm  
F1P 10.000 ppm  
F1 4001.30 Hz  
F2P 0.000 ppm  
F2 0.00 Hz  
PPMCM 0.46512 ppm/cm  
HZCM 186.10698 Hz/cm

Fig S80. <sup>1</sup>H NMR of compound 15 (500 MHz, C6D6).

S80

PMK-01-262

exp9 s2pul

```

SAMPLE          DEC. & VT
date Nov 18 2009 dfrq 125.693
solvent Benzene  dn  C13
file exp         dpwr 30
ACQUISITION     dof  0
sfrq 499.830     dm   nnn
tn      H1       dmm   c
at      3.000     dmf  200
np      48000     dseq
sw      8000.0    dres 1.0
fb      not used  homo
bs      4
PROCESSING
tpwr 58          wtfile
pw 4.8           proc   ft
d1 1.000         fn     not used
tof 499.7        math   f
nt 4
ct 4             werr
alock y          wexp   wft
gain not used    wbs    wft
wnt             wnt     wft
FLAGS
il n
in n
dp y
hs nn
DISPLAY
sp -250.1
wp 4998.0
vs 39
sc 0
wc 210
hzmm 23.80
is 102.59
rfl 4567.1
rfp 3578.8
th 1
ins 100.000
ai ph
  
```

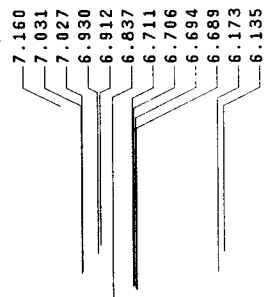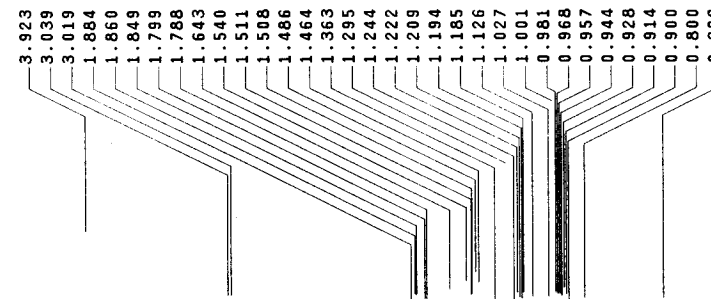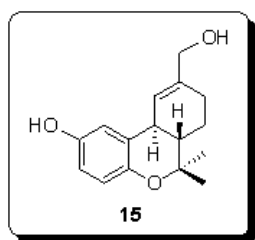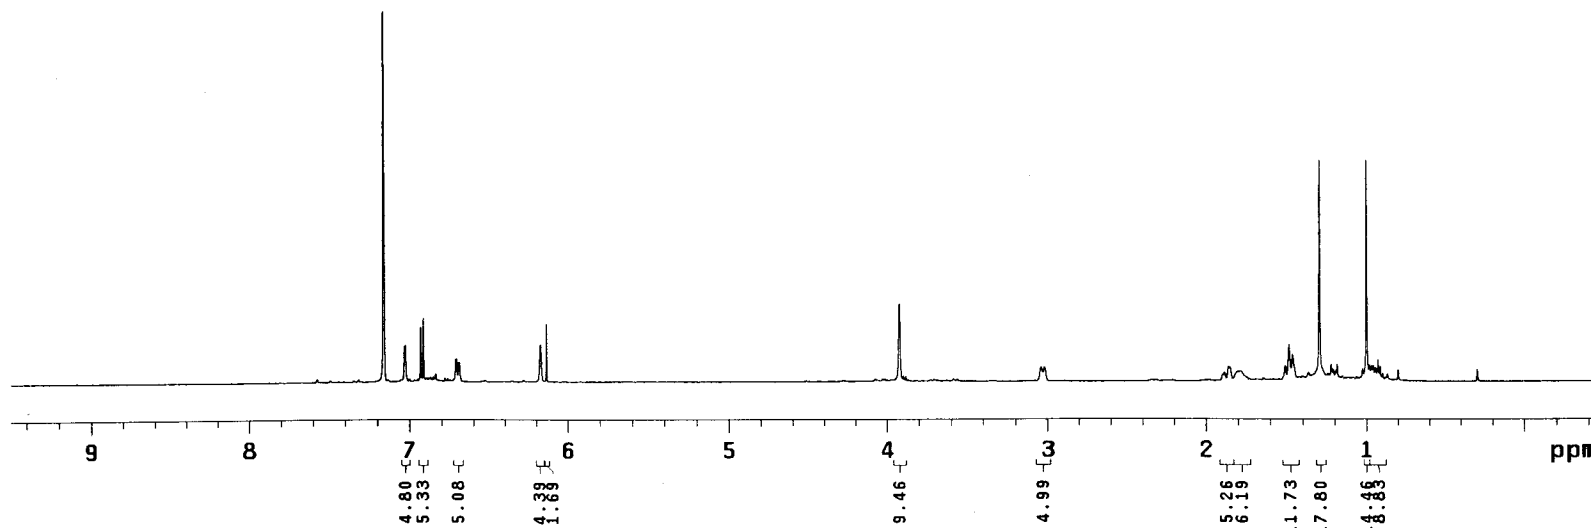

Fig S81. <sup>1</sup>H NMR of compound 15 (125 MHz, C<sub>6</sub>D<sub>6</sub>).

PMK-01-262

exp11 s2pu1

| SAMPLE      |             | DEC. & VT |          |
|-------------|-------------|-----------|----------|
| date        | Nov 18 2009 | dfrq      | 499.829  |
| solvent     | cdcl3       | dn        | H1       |
| file        | exp         | dpwr      | 39       |
| ACQUISITION |             |           |          |
| sfrq        | 125.696     | dm        | yyy      |
| tn          | C13         | dmm       | w        |
| at          | 1.000       | dmf       | 11905    |
| np          | 62894       | dseq      |          |
| sw          | 31446.5     | dres      | 1.0      |
| fb          | not used    | homo      | n        |
| PROCESSING  |             |           |          |
| bs          | 16          | lb        | 1.00     |
| ss          | 2           | wtfile    |          |
| tpwr        | 54          | proc      | ft       |
| pw          | 4.0         | fn        | not used |
| d1          | 1.000       | math      | f        |
| tof         | 2512.2      | werr      | react    |
| nt          | 6000        | wexp      | procplot |
| ct          | 3056        | wbs       | testsn   |
| alock       | y           | wnt       |          |
| gain        | not used    |           |          |
| FLAGS       |             |           |          |
| il          | n           |           |          |
| in          | n           |           |          |
| dp          | y           |           |          |
| hs          | nn          |           |          |
| DISPLAY     |             |           |          |
| sp          | -1256.9     |           |          |
| wp          | 27649.1     |           |          |
| vs          | 1123        |           |          |
| sc          | 0           |           |          |
| wc          | 210         |           |          |
| hzmm        | 131.67      |           |          |
| is          | 500.00      |           |          |
| rfl         | 17355.7     |           |          |
| rfp         | 16087.2     |           |          |
| th          | 5           |           |          |
| ins         | 100.000     |           |          |
| nm          | ph          |           |          |

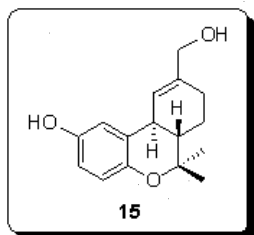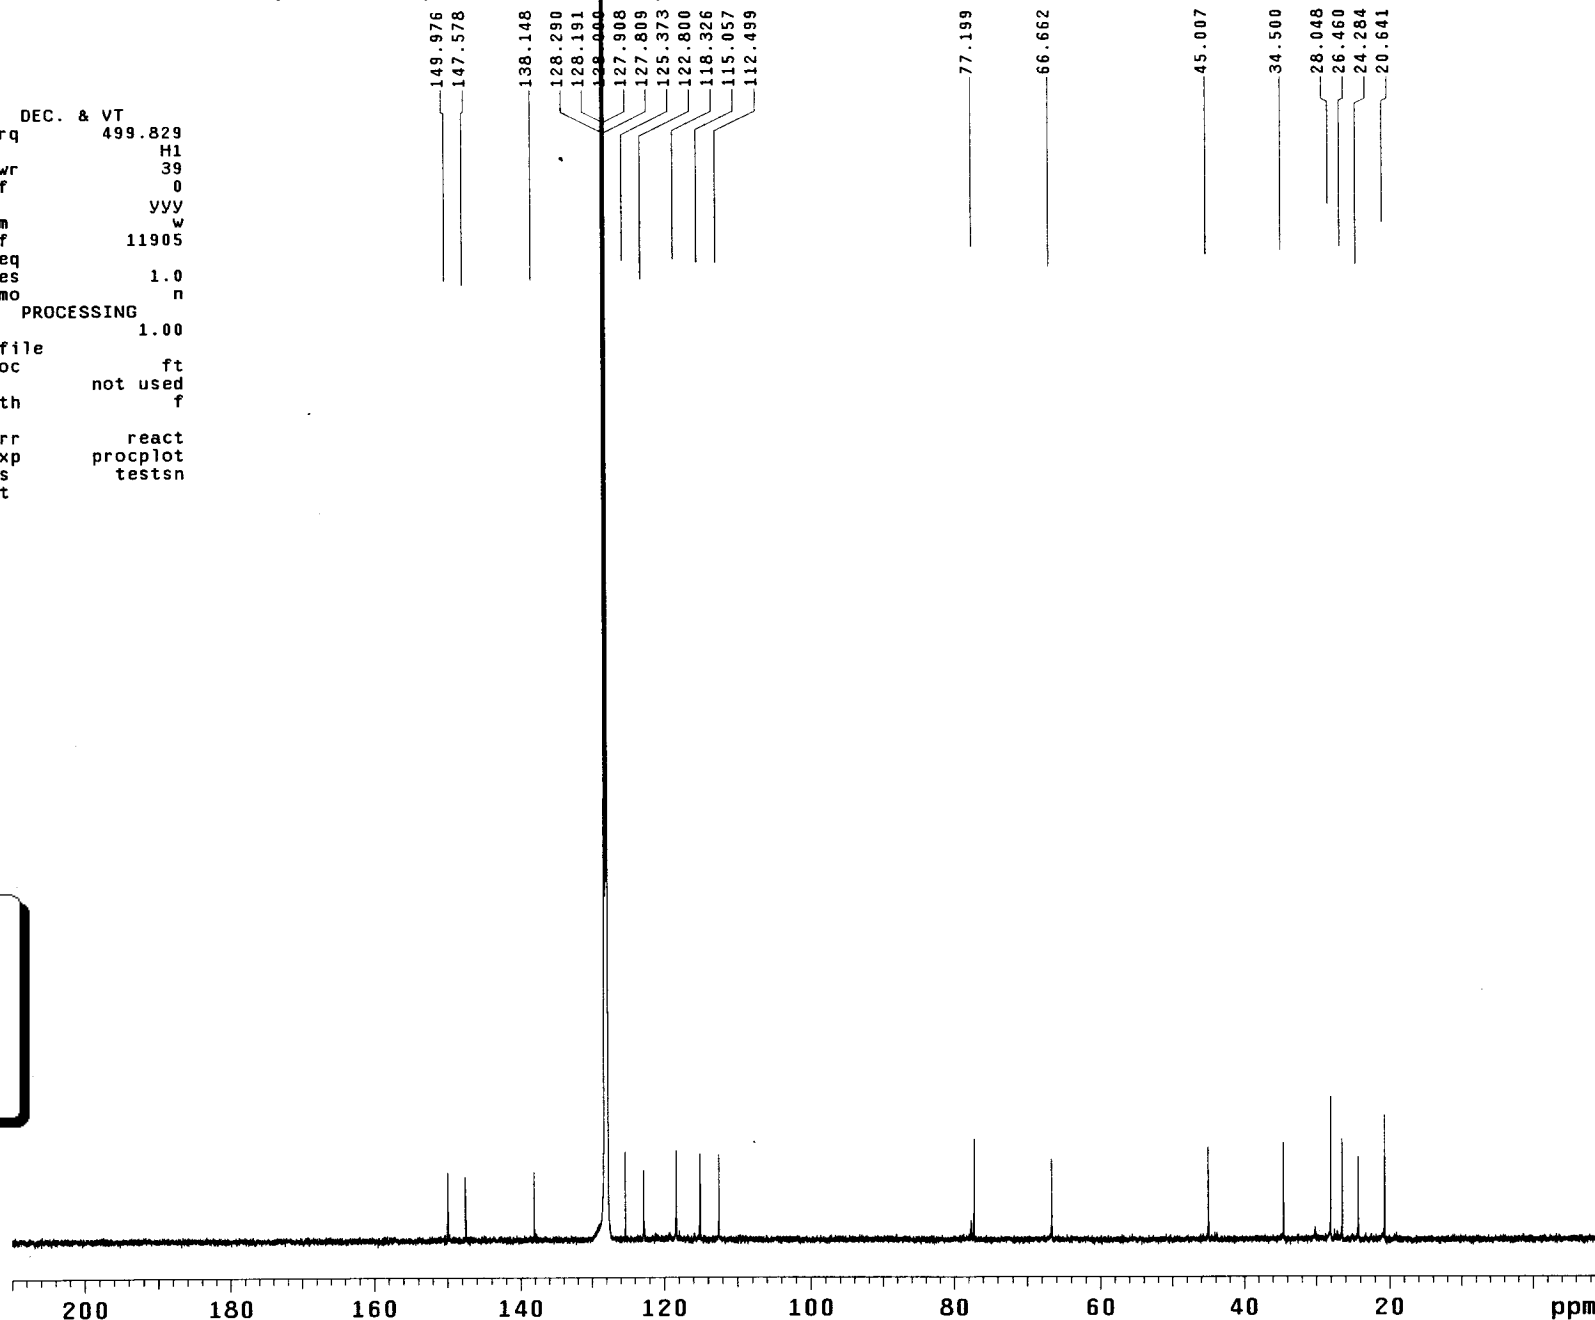

Fig S82. DEPT of compound 15, (C6D6).

S82

PMK-01-262

exp10 DEPT

| SAMPLE      |             | DEPT       |          | ACQUISITION ARRAYS |      |
|-------------|-------------|------------|----------|--------------------|------|
| date        | Nov 18 2009 | j1xh       | 140.0    | array              | mult |
| solvent     | Benzene     | mult       | arrayed  | arraydim           | 3    |
| sample      | undefined   | SPECIAL    |          |                    |      |
| ACQUISITION |             | temp       | not used | i                  | mult |
| sw          | 31446.5     | gain       | 20       | 1                  | 0.5  |
| at          | 1.000       | spin       | 0        | 2                  | 1    |
| np          | 62894       | PROCESSING |          | 3                  | 1.5  |
| bs          | 16          | lb         | 1.00     |                    |      |
| ss          | -4          | fn         | not used |                    |      |
| dl          | 1.000       | SPECTRUM   |          |                    |      |
| nt          | 1200        | wp         | 27649.1  |                    |      |
| ct          | 1200        | sp         | -1257.4  |                    |      |
| TRANSMITTER |             | rp         | -114.1   |                    |      |
| tn          | C13         | lp         | 174.6    |                    |      |
| tof         | 2512.2      | ai         | cdc ph   |                    |      |
| tpwr        | 54          | REFERENCE  |          |                    |      |
| pw          | 10.500      | rfl        | 1269.9   |                    |      |
| DECOUPLER   |             | rfp        | 0        |                    |      |
| dn          | H1          | PLOT       |          |                    |      |
| dof         | 0           | wc         | 210      |                    |      |
| dpwr        | 39          | sc         | 0        |                    |      |
| dm          | nny         | vs         | 603      |                    |      |
| dmm         | ccw         | hzmm       | 131.67   |                    |      |
| dmf         | 11905       | th         | 18       |                    |      |
| pplvl       | 51          |            |          |                    |      |
| pp          | 24.000      |            |          |                    |      |

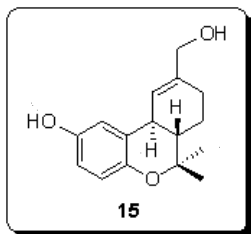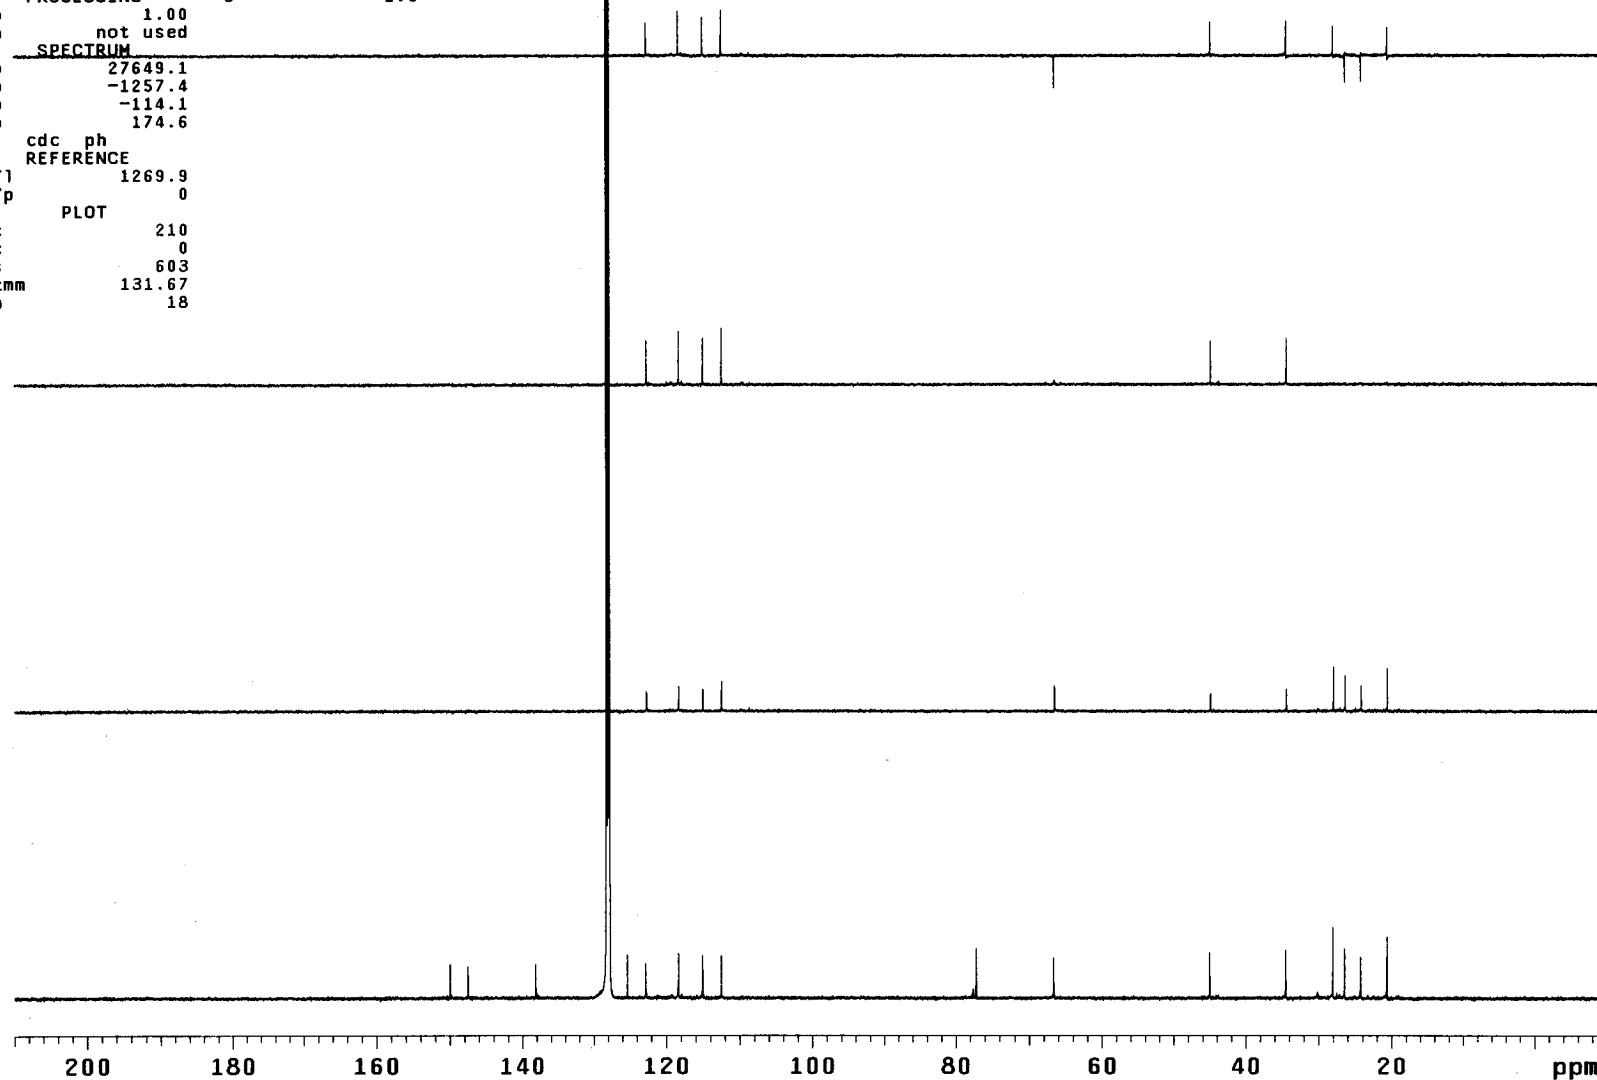

Fig S83. COSY of compound 15 (C6D6).

S83

PMK-01-262

exp12 gCOSY

| SAMPLE         |             | FLAGS         |          |
|----------------|-------------|---------------|----------|
| date           | Nov 18 2009 | hs            | nn       |
| solvent        | Benzene     | sspul         | n        |
| sample         | undefined   | hsglv1        | 1003     |
| ACQUISITION    |             | SPECIAL       |          |
| sw             | 4490.3      | temp          | not used |
| at             | 0.228       | gain          | 28       |
| np             | 2048        | spin          | 0        |
| fb             | not used    | F2 PROCESSING |          |
| ss             | 16          | sb            | -0.114   |
| d1             | 1.000       | sbs           | not used |
| nt             | 8           | fn            | 2048     |
| 2D ACQUISITION |             | F1 PROCESSING |          |
| sw1            | 4490.3      | sb1           | -0.029   |
| n1             | 128         | sbs1          | not used |
| TRANSMITTER    |             | proc1         |          |
| tn             | H1          | fn1           | 2048     |
| sfrq           | 499.829     | DISPLAY       |          |
| tof            | -499.9      | sp            | -234.4   |
| tpwr           | 58          | wp            | 4486.0   |
| pw             | 11.100      | sp1           | -234.3   |
| GRADIENTS      |             | wp1           | 4486.0   |
| gzlv1          | 1003        | rfl           | 1748.2   |
| gt1            | 0.001000    | rfp           | 1509.5   |
| gstab          | 0.000500    | rfl1          | 1748.1   |
| DECOUPLER      |             | rfp1          | 1509.5   |
| dn             | C13         | PLOT          |          |
| dm             | nnn         | wc            | 155.0    |
|                |             | sc            | 10.0     |
|                |             | wc2           | 155.0    |
|                |             | sc2           | 0        |
|                |             | vs            | 113      |
|                |             | th            | 5        |
|                |             | af            | cdc av   |

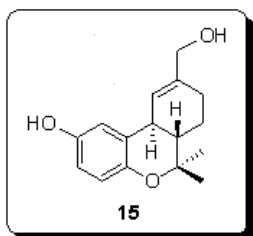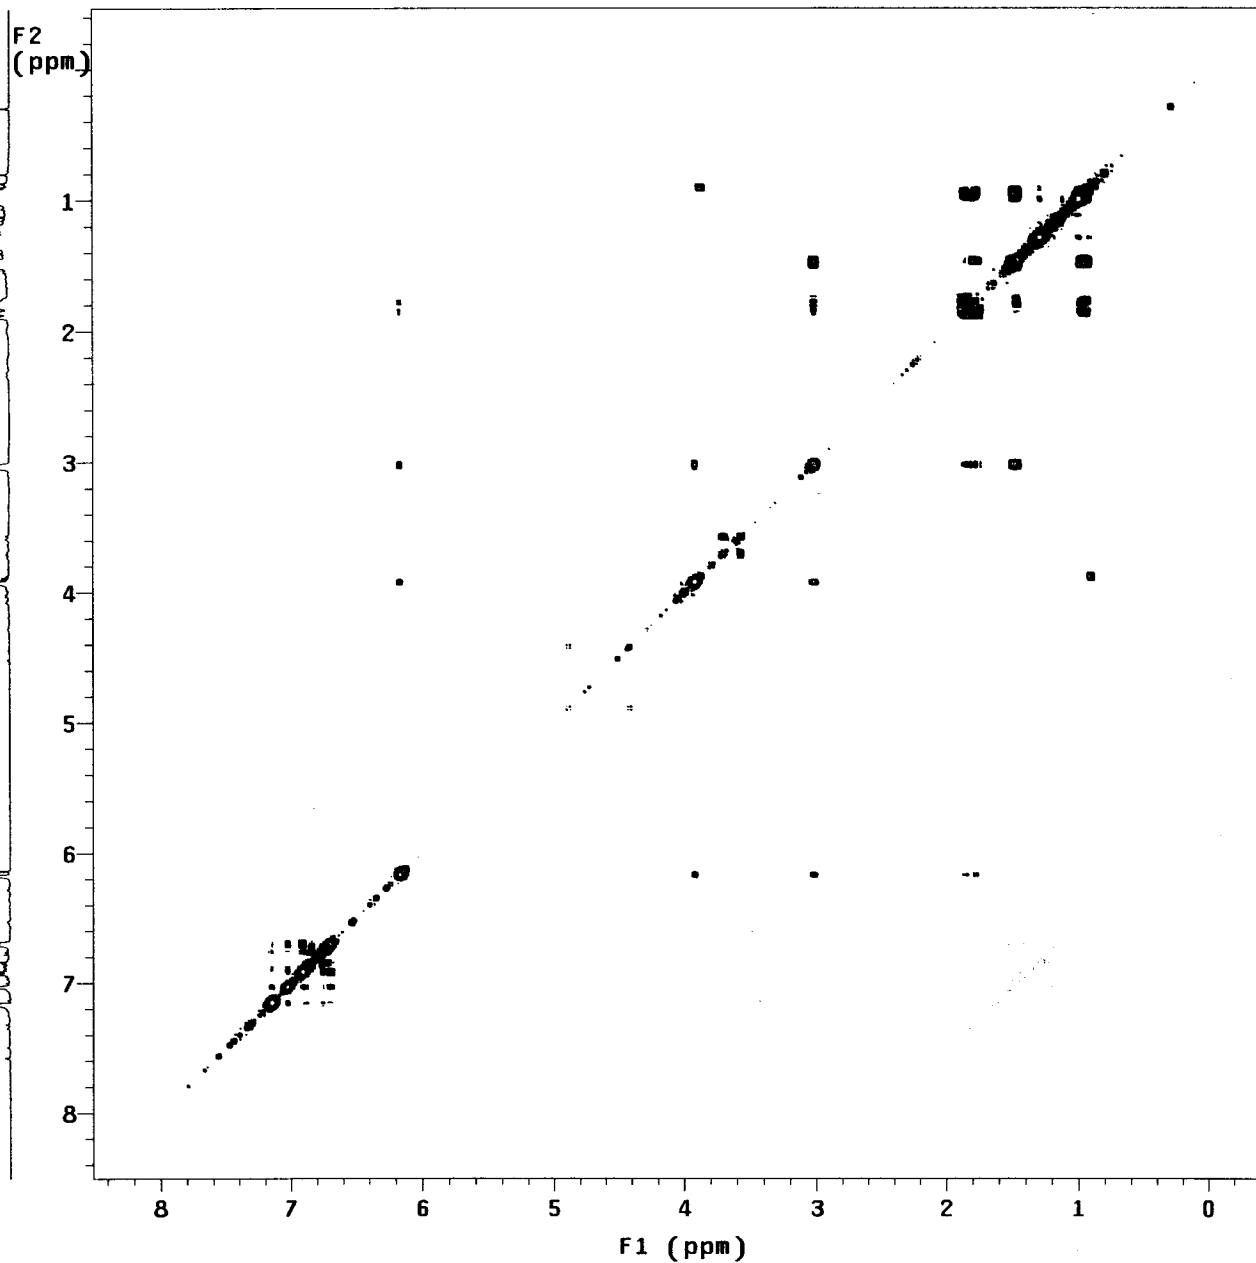

Fig S84. HSQC of compound 15 (C6D6).

S84

## STANDARD PROTON PARAMETERS

exp5 gHSQC

| SAMPLE         |             | FLAGS         | ACQUISITION |          | ARRAYS |
|----------------|-------------|---------------|-------------|----------|--------|
| date           | Nov 19 2009 | hs            | n           | array    | phase  |
| solvent        | Benzene     | sspul         | y           | arraydim | 256    |
| sample         | undefined   | PFGflg        | y           |          |        |
| ACQUISITION    |             | hsglv1        | 1003        | i        | phase  |
| sw             | 4490.3      | SPECIAL       |             | 1        | 1      |
| at             | 0.228       | temp          | not used    | 2        | 2      |
| np             | 2048        | gain          | 24          |          |        |
| fb             | not used    | spin          | 0           |          |        |
| ss             | 32          | GRADIENTS     |             |          |        |
| d1             | 1.000       | gzlv11        | 1003        |          |        |
| nt             | 16          | gt1           | 0.002000    |          |        |
| 2D ACQUISITION |             | gzlv13        | 505         |          |        |
| sw1            | 21367.5     | gt3           | 0.001000    |          |        |
| ni             | 128         | gstab         | 0.000500    |          |        |
| phase          | arrayed     | F2 PROCESSING |             |          |        |
| tn             | TRANSMITTER | gf            | 0.105       |          |        |
| sfrq           | H1          | gfs           | not used    |          |        |
| tof            | 499.829     | fn            | 2048        |          |        |
| tpwr           | -499.9      | F1 PROCESSING |             |          |        |
| pw             | 58          | gf1           | 0.006       |          |        |
| DECOUPLER      | 11.100      | gfs1          | not used    |          |        |
| dn             | C13         | proc1         | lp          |          |        |
| dof            | -2515.2     | fn1           | 2048        |          |        |
| dm             | nny         | DISPLAY       |             |          |        |
| dmm            | ccp         | sp            | 248.3       |          |        |
| dmf            | 32258       | wp            | 3565.1      |          |        |
| dpwr           | 36          | sp1           | 2135.0      |          |        |
| pxwlv1         | 52          | wp1           | 14439.8     |          |        |
| pxw            | 14.300      | rfl           | 3812.8      |          |        |
| HSQC           | 140.0       | rfl1          | 3578.8      |          |        |
| j1xh           | 140.0       | rfl1          | 17374.4     |          |        |
| nullflg        | y           | rfl1          | 16087.2     |          |        |
| mult           | 2           | PLOT          |             |          |        |
|                |             | wc            | 150.0       |          |        |
|                |             | sc            | 6.2         |          |        |
|                |             | wc2           | 116.2       |          |        |
|                |             | sc2           | 0           |          |        |
|                |             | vs            | 157         |          |        |
|                |             | th            | 4           |          |        |
|                |             | ai            | cdc         | ph       |        |

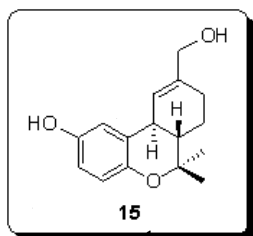F2  
(ppm)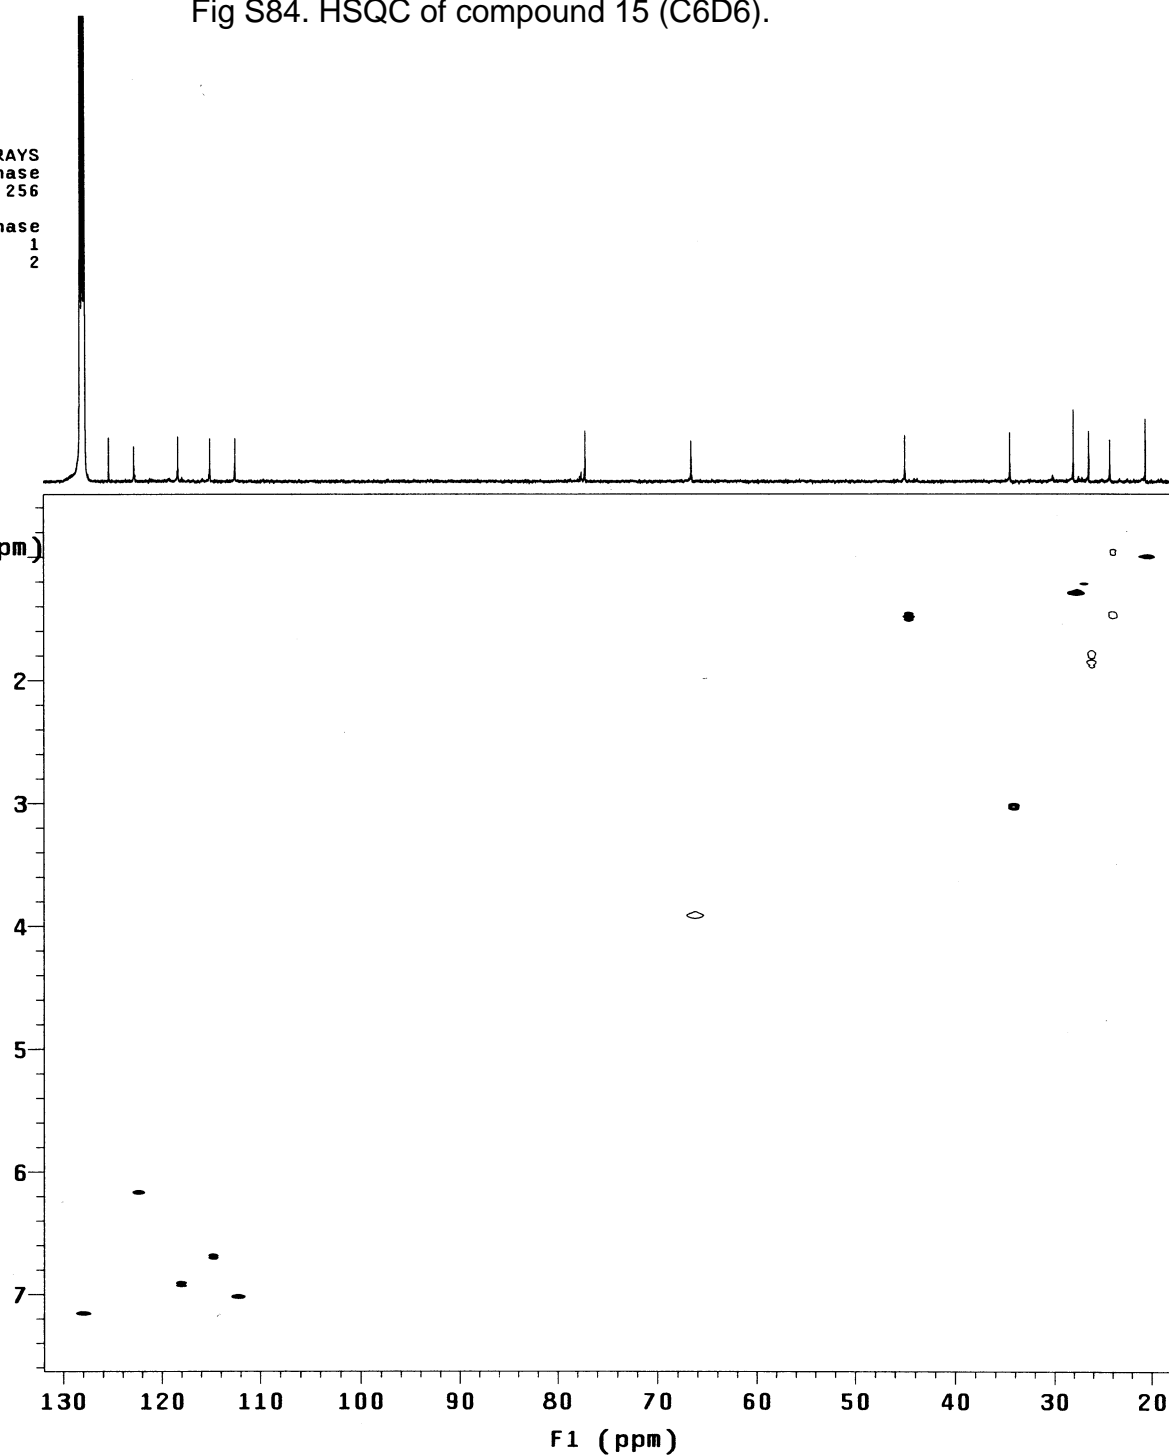

F1 (ppm)

Fig S85. NOESY of compound 15 (500 MHz, C6D6).

S85

PMK-01-262

exp6 NOESY

| SAMPLE         |             | FLAGS         |          |
|----------------|-------------|---------------|----------|
| date           | Nov 19 2009 | hs            | n        |
| solvent        | Benzene     | sspul         | y        |
| sample         | undefined   | PFGflg        | y        |
| ACQUISITION    |             | hsglvi        | 1003     |
| sw             | 4490.3      | SPECIAL       |          |
| at             | 0.228       | temp          | not used |
| np             | 2048        | gain          | 24       |
| fb             | not used    | spin          | 0        |
| ss             | 32          | F2 PROCESSING |          |
| d1             | 1.000       | gf            | 0.105    |
| nt             | 8           | gfs           | not used |
| 2D ACQUISITION |             | fn            | 2048     |
| sw1            | 4490.3      | F1 PROCESSING |          |
| n1             | 200         | gf1           | 0.041    |
| TRANSMITTER    |             | gfs1          | not used |
| tn             | H1          | proc1         | 1p       |
| sfrq           | 499.829     | fn1           | 2048     |
| tof            | -499.9      | DISPLAY       |          |
| tpwr           | 58          | sp            | -241.5   |
| pw             | 11.100      | wp            | 4486.0   |
| NOESY          |             | sp1           | -241.5   |
| mix            | 0.600       | wp1           | 4486.0   |
| PRESATURATION  |             | rfl           | 245.8    |
| satmode        | nnnn        | rfp           | 0        |
| satpwr         | 0           | rfl1          | 245.8    |
| satdly         | 0           | rfp1          | 0        |
| satfrq         | 0           | PLOT          |          |
| DECOUPLER      |             | wc            | 155.0    |
| dn             | C13         | sc            | 10.0     |
| dm             | nnn         | wc2           | 155.0    |
|                |             | sc2           | 0        |
|                |             | vs            | 157      |
|                |             | th            | 1        |
|                |             | ai            | ph       |

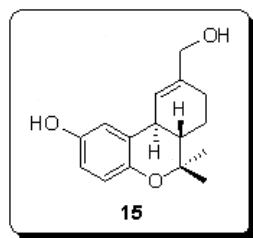F2  
(ppm)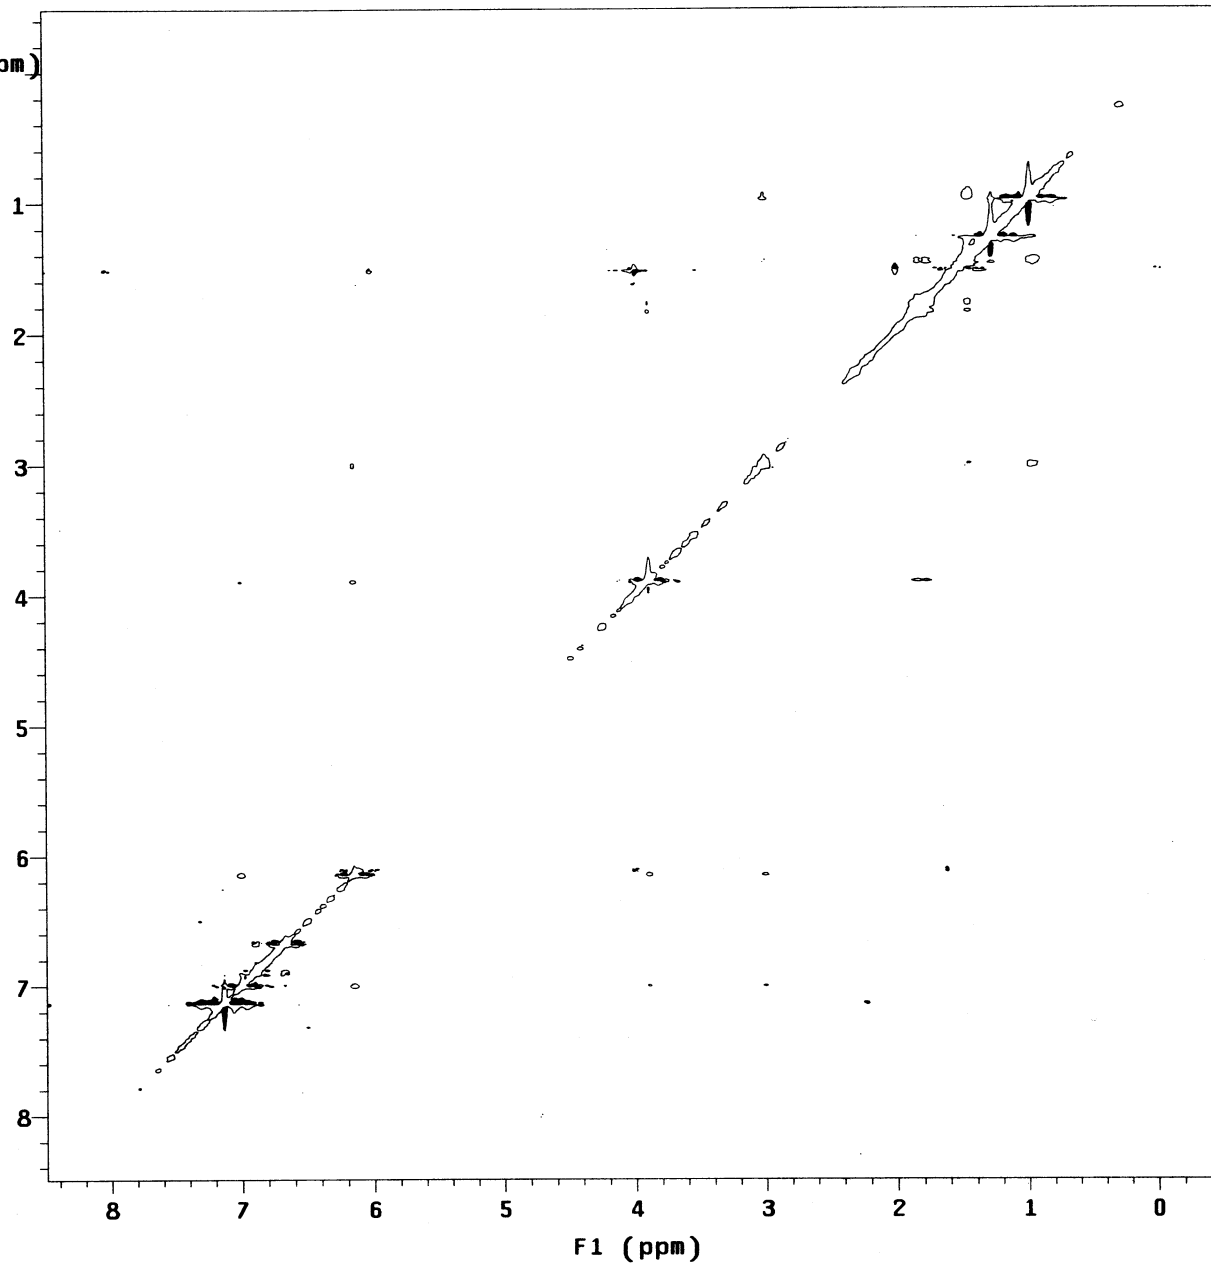

Fig S86. <sup>1</sup>H NMR of compound 16 (500 MHz, CDCl<sub>3</sub>).

PMK-01-269

exp12 s2pu1

|             |             |            |          |
|-------------|-------------|------------|----------|
| SAMPLE      |             | DEC. & VT  |          |
| date        | Oct 27 2009 | dfrq       | 125.693  |
| solvent     | cdc13       | dn         | C13      |
| file        | exp         | dpwr       | 30       |
| ACQUISITION |             | dof        | 0        |
| sfrq        | 499.830     | dm         | nnn      |
| tn          | H1          | dmm        | c        |
| at          | 3.000       | dmf        | 200      |
| np          | 48000       | dseq       |          |
| sw          | 8000.0      | dres       | 1.0      |
| fb          | 4000        | homo       | n        |
| bs          | 4           | PROCESSING |          |
| tpwr        | 59          | wtfile     |          |
| pw          | 4.8         | proc       | ft       |
| d1          | 1.000       | fn         | not used |
| tof         | 499.7       | math       | f        |
| nt          | 4           |            |          |
| ct          | 4           | werr       | react    |
| alock       | y           | wexp       | procplot |
| gain        | not used    | wbs        |          |
| FLAGS       |             | wnt        | wft      |
| il          | n           |            |          |
| in          | n           |            |          |
| dp          | y           |            |          |
| hs          | nn          |            |          |
| DISPLAY     |             |            |          |
| sp          | -250.1      |            |          |
| wp          | 4998.0      |            |          |
| vs          | 97          |            |          |
| sc          | 0           |            |          |
| wc          | 210         |            |          |
| hzmm        | 23.80       |            |          |
| is          | 75.25       |            |          |
| rfl         | 4638.2      |            |          |
| rfp         | 3618.7      |            |          |
| th          | 2           |            |          |
| ins         | 1.000       |            |          |
| nm          | ph          |            |          |

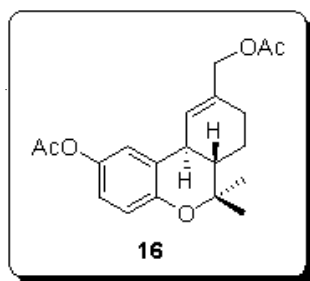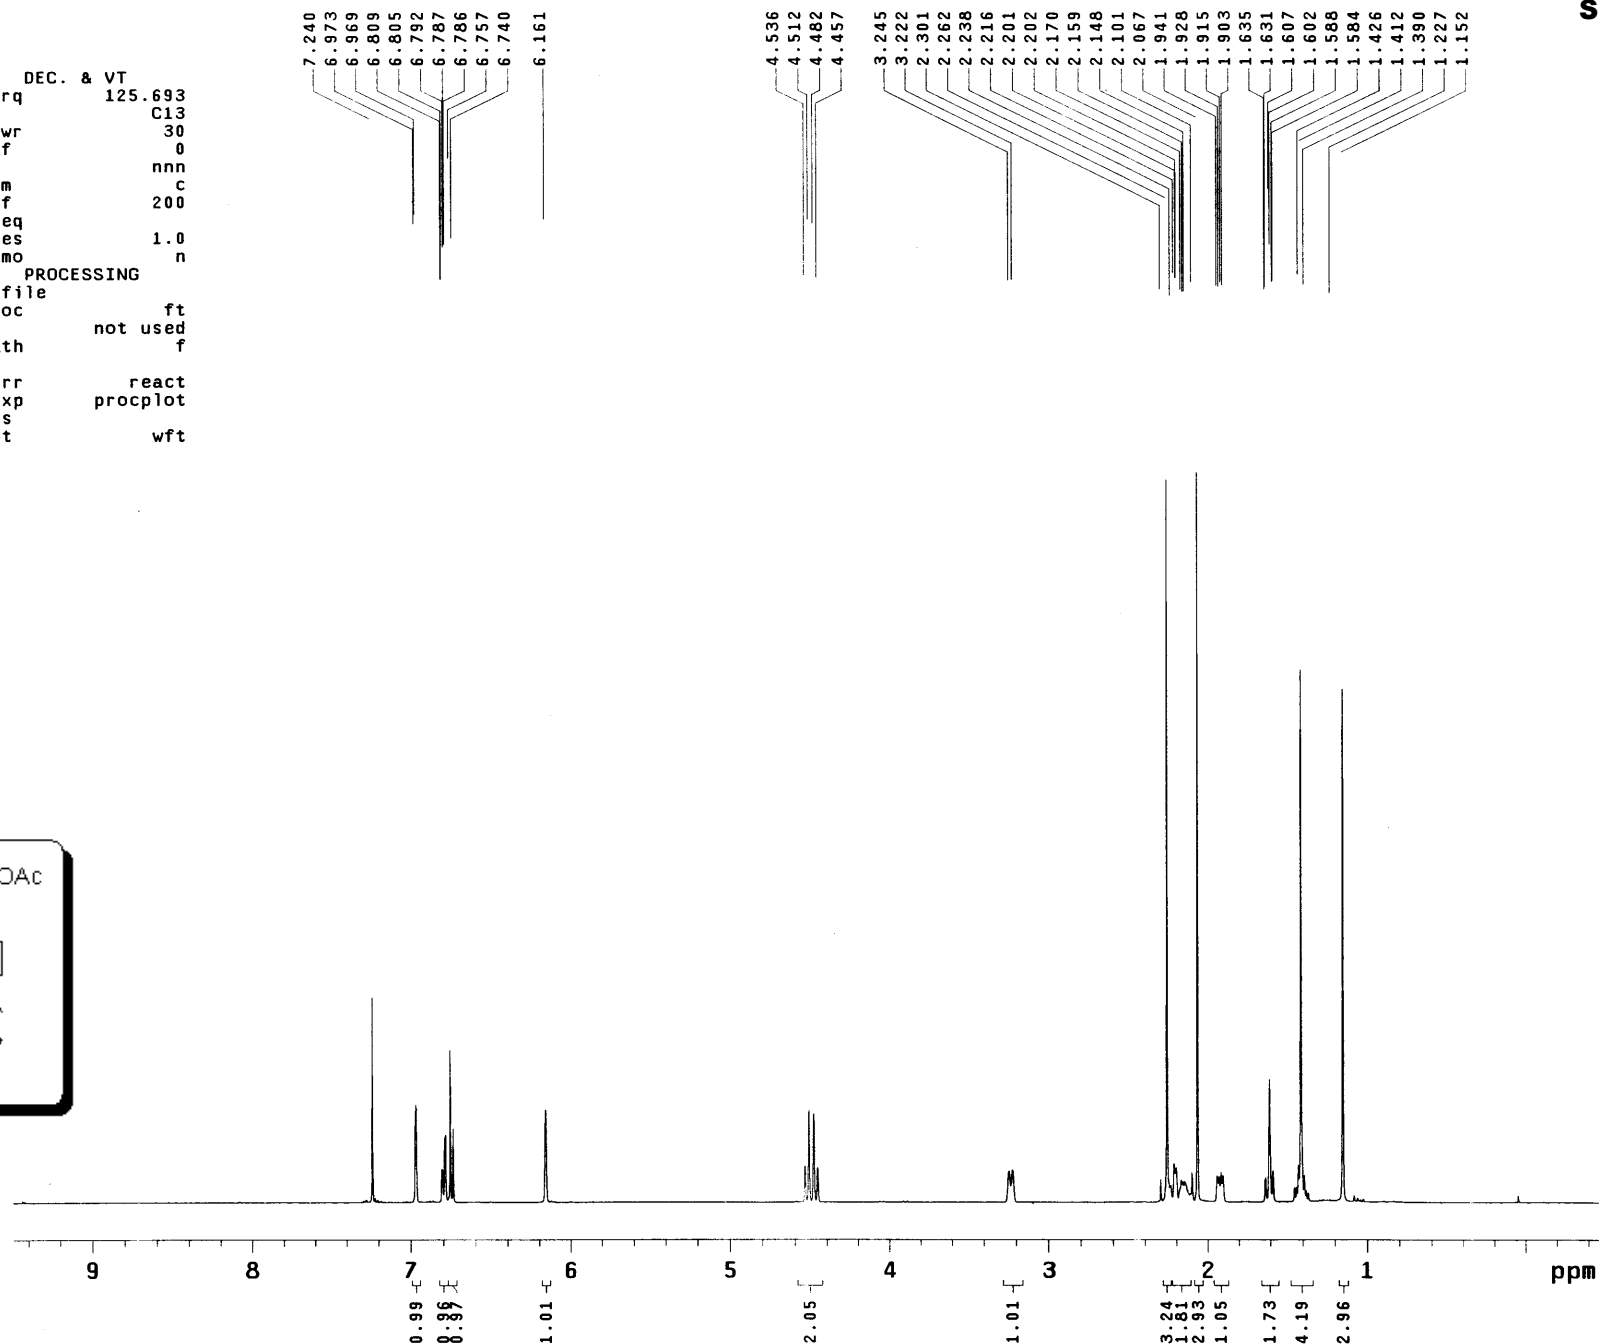

Fig S87. <sup>13</sup>C NMR of compound 16 (125 MHz, CDCl<sub>3</sub>).

PMK-01-269

exp13 s2pu1

SAMPLE DEC. & VT  
date Oct 27 2009 dfrq 499.829  
solvent cdcl3 dn H1  
file exp dpwr 39  
ACQUISITION dof 0  
sfrq 125.696 dm yyy  
tn C13 dmm w  
at 1.000 dmf 11905  
np 62894 dseq  
sw 31446.5 dres 1.0  
fb 17000 homo n  
bs 16  
ss 2 PROCESSING  
tpwr 54 lb 1.00  
pw 4.0 wtfile  
d1 1.000 proc ft  
tof 2512.2 fn not used  
nt 10000 math f  
ct 10000 werr react  
alock y wexp procplot  
gain not used wbs testsn  
wnt  
FLAGS  
il n  
in n  
dp y  
hs nn  
DISPLAY  
sp -1257.0  
wp 27649.1  
vs 125  
sc 0  
wc 210  
hzmm 131.67  
is 500.00  
rfl 10985.4  
rfp 9677.5  
th 8  
ins 100.000  
nm ph

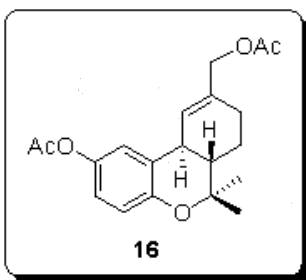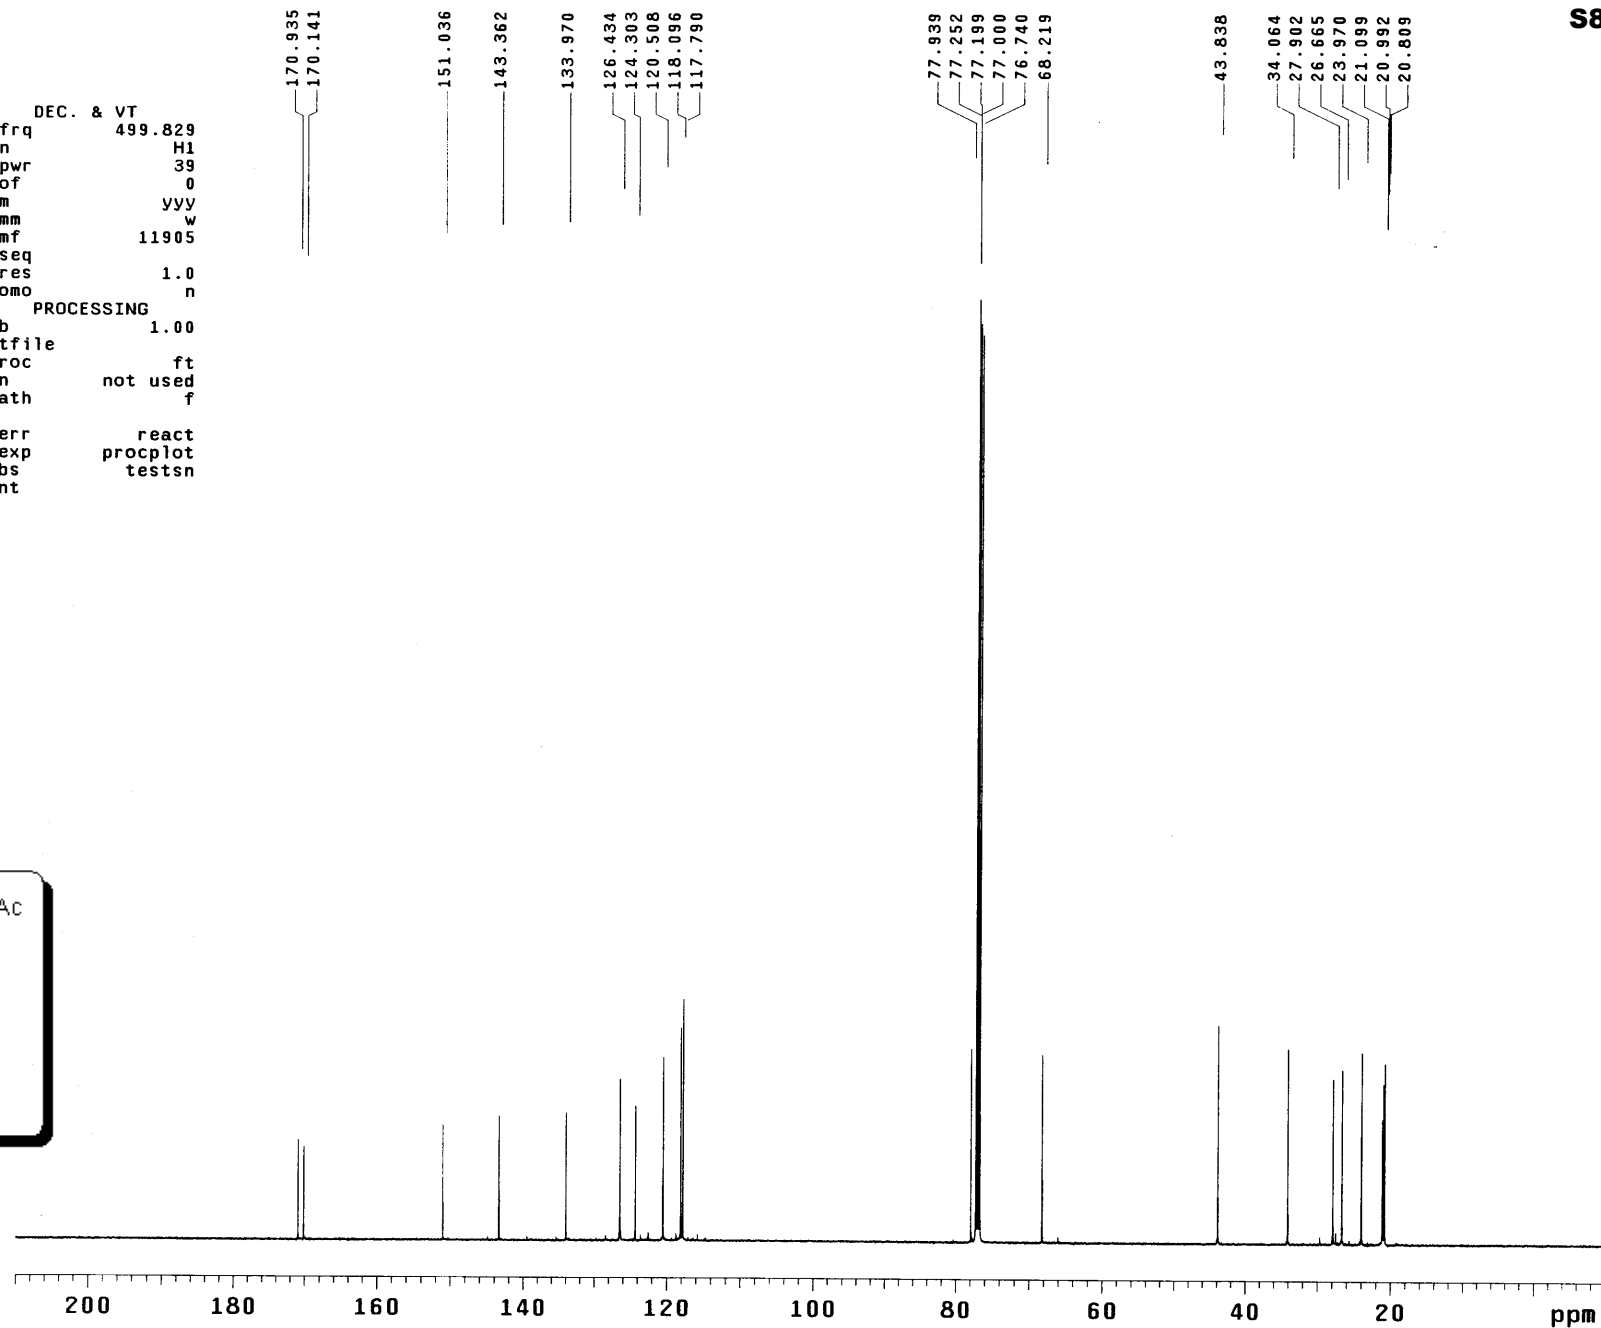

S87

Fig S88. DEPT of compound 16 (CDCl<sub>3</sub>).

S88

PMK-01-269

exp13 DEPT

| SAMPLE      |                   | DEPT       | ACQUISITION ARRAYS |       |
|-------------|-------------------|------------|--------------------|-------|
| date        | Oct 27 2009       | j1xh       | 140.0              | array |
| solvent     | CdCl <sub>3</sub> | mult       | arrayed            | mult  |
| sample      | undefined         | SPECIAL    | arraydim           | 3     |
| ACQUISITION |                   | temp       | not used           | i     |
| sw          | 31446.5           | gain       | 20                 | 1     |
| at          | 1.000             | spin       | 0                  | 2     |
| np          | 62894             | PROCESSING | 3                  | 1.5   |
| bs          | 16                | lb         | 1.00               |       |
| ss          | -4                | fn         | not used           |       |
| d1          | 1.000             | SPECTRUM   |                    |       |
| nt          | 1200              | wp         | 27649.1            |       |
| ct          | 1200              | sp         | -1257.0            |       |
| TRANSMITTER |                   | rp         | 18.0               |       |
| tn          | C13               | lp         | 68.5               |       |
| tof         | 2512.2            | ai         | ph                 |       |
| tpwr        | 54                | REFERENCE  |                    |       |
| pw          | 10.500            | rfl        | 9881.7             |       |
| DECOUPLER   |                   | rfp        | 8573.9             |       |
| dn          | H1                | PLOT       |                    |       |
| dof         | 0                 | wc         | 210                |       |
| dpwr        | 39                | sc         | 0                  |       |
| dm          | nny               | vs         | 106                |       |
| dmm         | ccw               | hzmm       | 131.67             |       |
| dmf         | 11905             | th         | 3                  |       |
| pp1v1       | 51                |            |                    |       |
| pp          | 24.000            |            |                    |       |

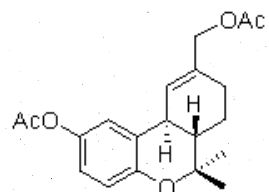

16

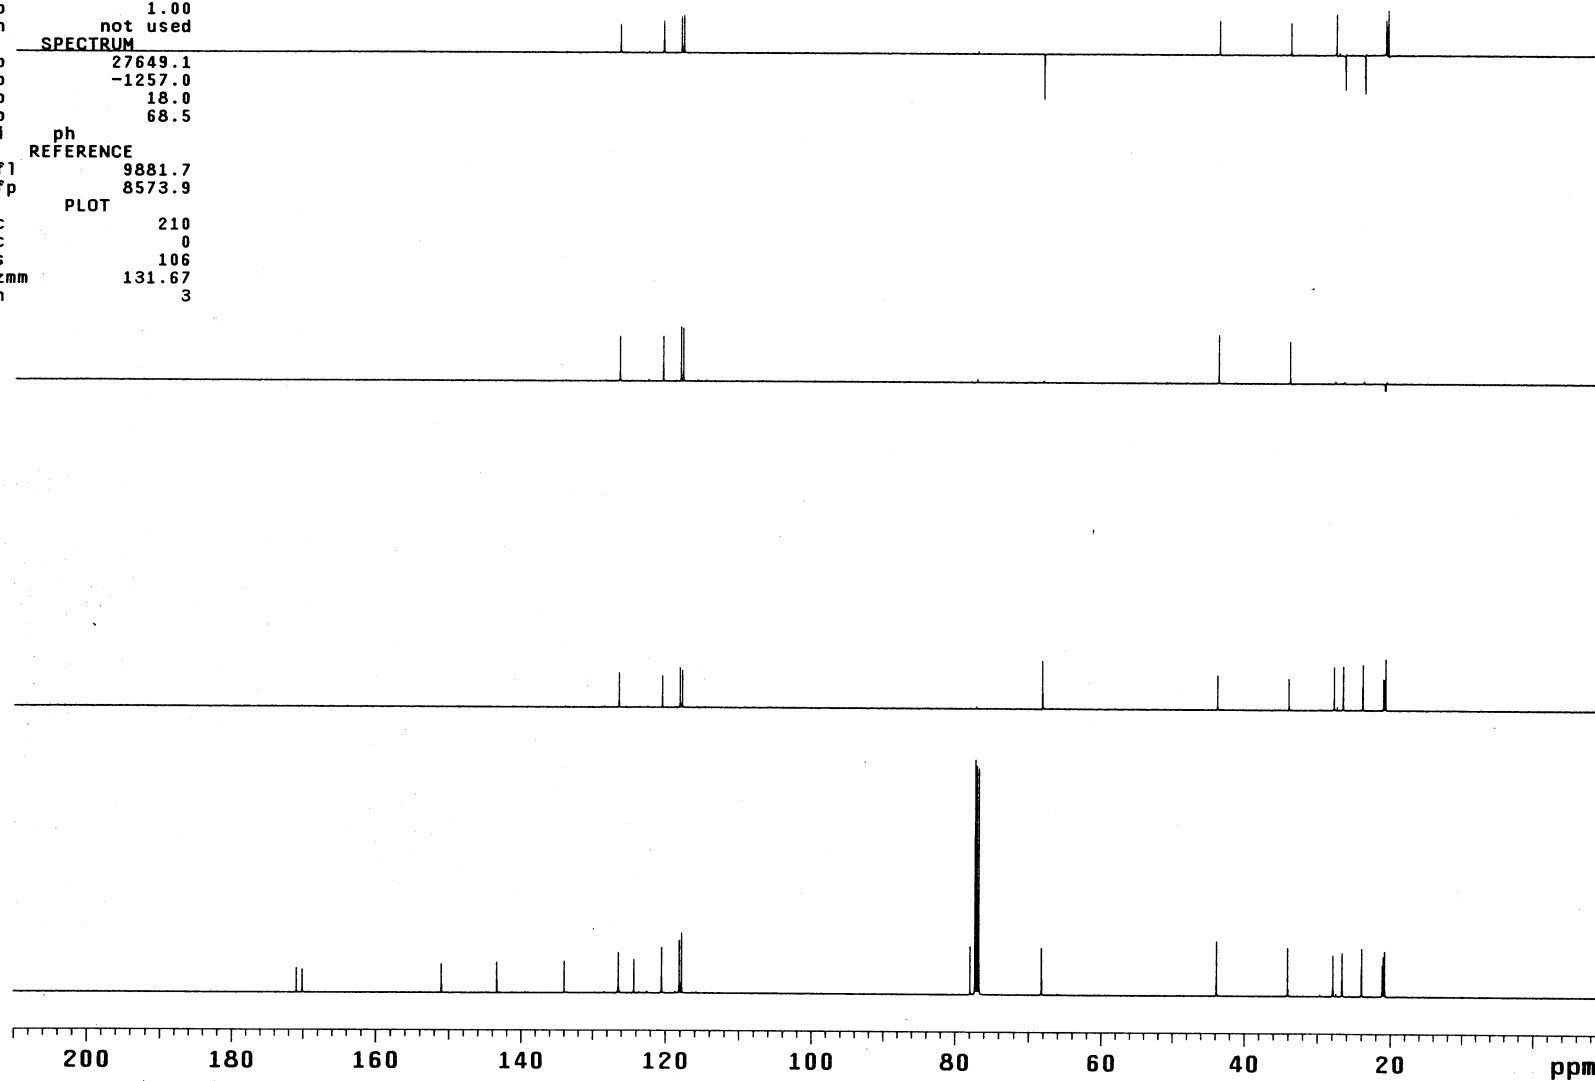

Fig S89. COSY of compound 16 (CDCl<sub>3</sub>).

S89

PMK-01-269

exp15 gCOSY

SAMPLE  
date Oct 27 2009  
solvent cdc13  
sample undefined

FLAGS

hs nn  
sspul n  
hsglv1 1026

ACQUISITION

SPECIAL

sw 3498.8 temp not used  
at 0.146 gain 34  
np 1024 spin 0  
fb 2000  
ss 16 sb -0.073  
d1 1.000 sbs not used  
nt 8 fn 1024

F2 PROCESSING

2D ACQUISITION

F1 PROCESSING

sw1 3498.8 sb1 -0.037  
ni 128 sbs1 not used

TRANSMITTER

proc1 tp

tn H1 fn1 1024

DISPLAY

sfrq 499.829 sp 482.0  
tof -250.0 wp 3492.0

tpwr 59 sp1 483.2  
pw 13.500 wp1 3492.0

GRADIENTS

gzlv1 1026 rfl 1135.2  
gt1 0.001000 rfp 1610.4

gstab 0.000500 rfl1 1134.0  
rflp1 1610.4

DECOUPLER

dn C13 PLOT  
dm nnn wc 155.0

wc 10.0

wc2 155.0

sc2 0

vs 113

th 4

ai cdc av

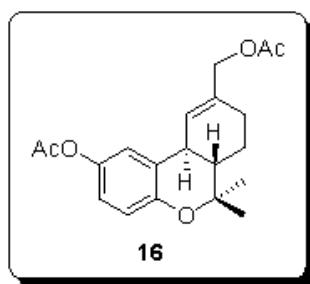F2  
(ppm)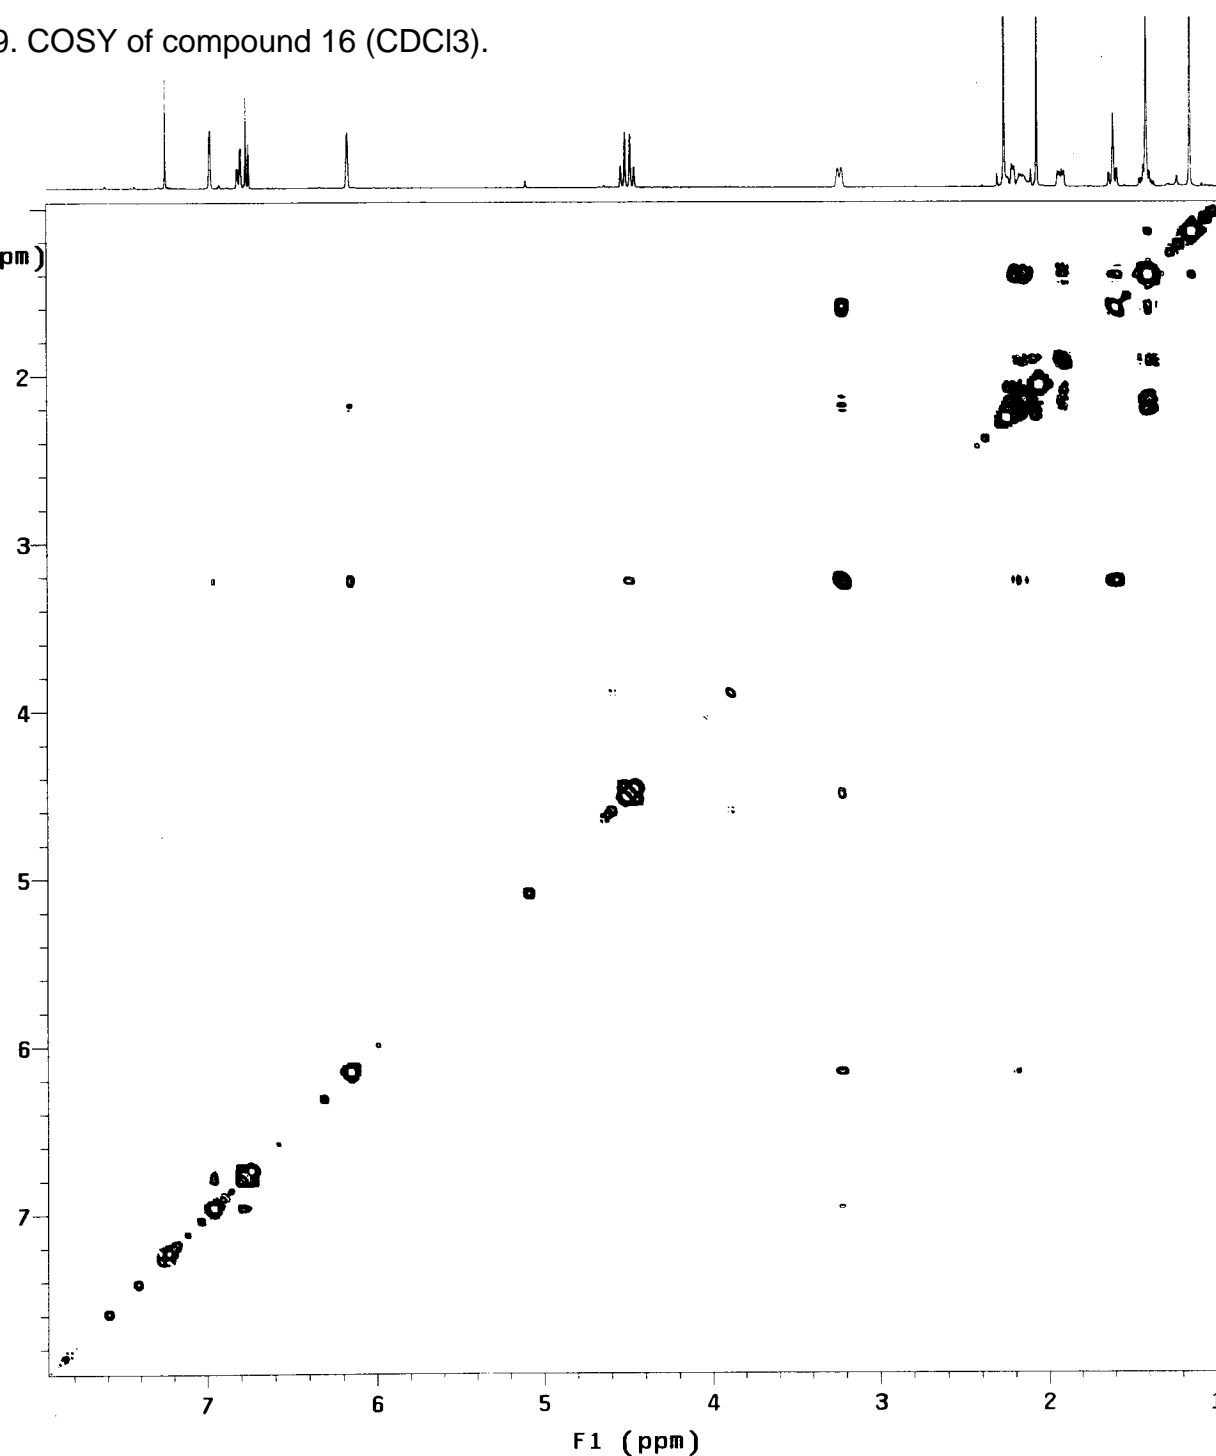

Fig S90. NOESY of compound 16 (CDCl<sub>3</sub>).

S90

PMK-01-269

exp17 NOESY

| SAMPLE         |             | FLAGS         |          |
|----------------|-------------|---------------|----------|
| date           | Oct 27 2009 | hs            | n        |
| solvent        | cdcl3       | sspul         | y        |
| sample         | undefined   | PFGflg        | y        |
| ACQUISITION    |             | hsglvi        | 1026     |
| sw             | 3498.8      | SPECIAL       |          |
| at             | 0.146       | temp          | not used |
| np             | 1024        | gain          | 34       |
| fb             | 2000        | spin          | 0        |
| ss             | 32          | F2 PROCESSING |          |
| d1             | 1.500       | gf            | 0.068    |
| nt             | 8           | gfs           | not used |
| 2D ACQUISITION |             | fn            | 1024     |
| sw1            | 3498.8      | F1 PROCESSING |          |
| ni             | 200         | gf1           | 0.053    |
| TRANSMITTER    |             | gfs1          | not used |
| tn             | H1          | proc1         | lp       |
| sfrq           | 499.829     | fn1           | 1024     |
| tof            | -250.0      | DISPLAY       |          |
| tpwr           | 59          | sp            | 481.5    |
| pw             | 13.500      | wp            | 3492.0   |
| NOESY          |             | sp1           | 482.9    |
| mix            | 0.600       | wp1           | 3492.0   |
| PRESATURATION  |             | rf1           | 1135.8   |
| satmode        | nnnn        | rfp           | 1610.4   |
| satpwr         | 0           | rf11          | 1134.4   |
| satdly         | 0           | rfp1          | 1610.4   |
| satfrq         | 0           | PLOT          |          |
| DECOUPLER      |             | wc            | 155.0    |
| dn             | C13         | sc            | 10.0     |
| dm             | nnn         | wc2           | 155.0    |
|                |             | sc2           | 0        |
|                |             | vs            | 113      |
|                |             | th            | 1        |
|                |             | ai            | ph       |

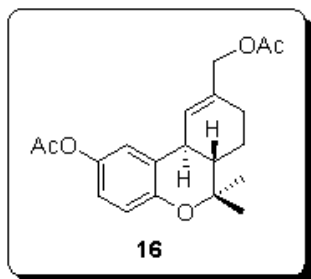F2  
(ppm)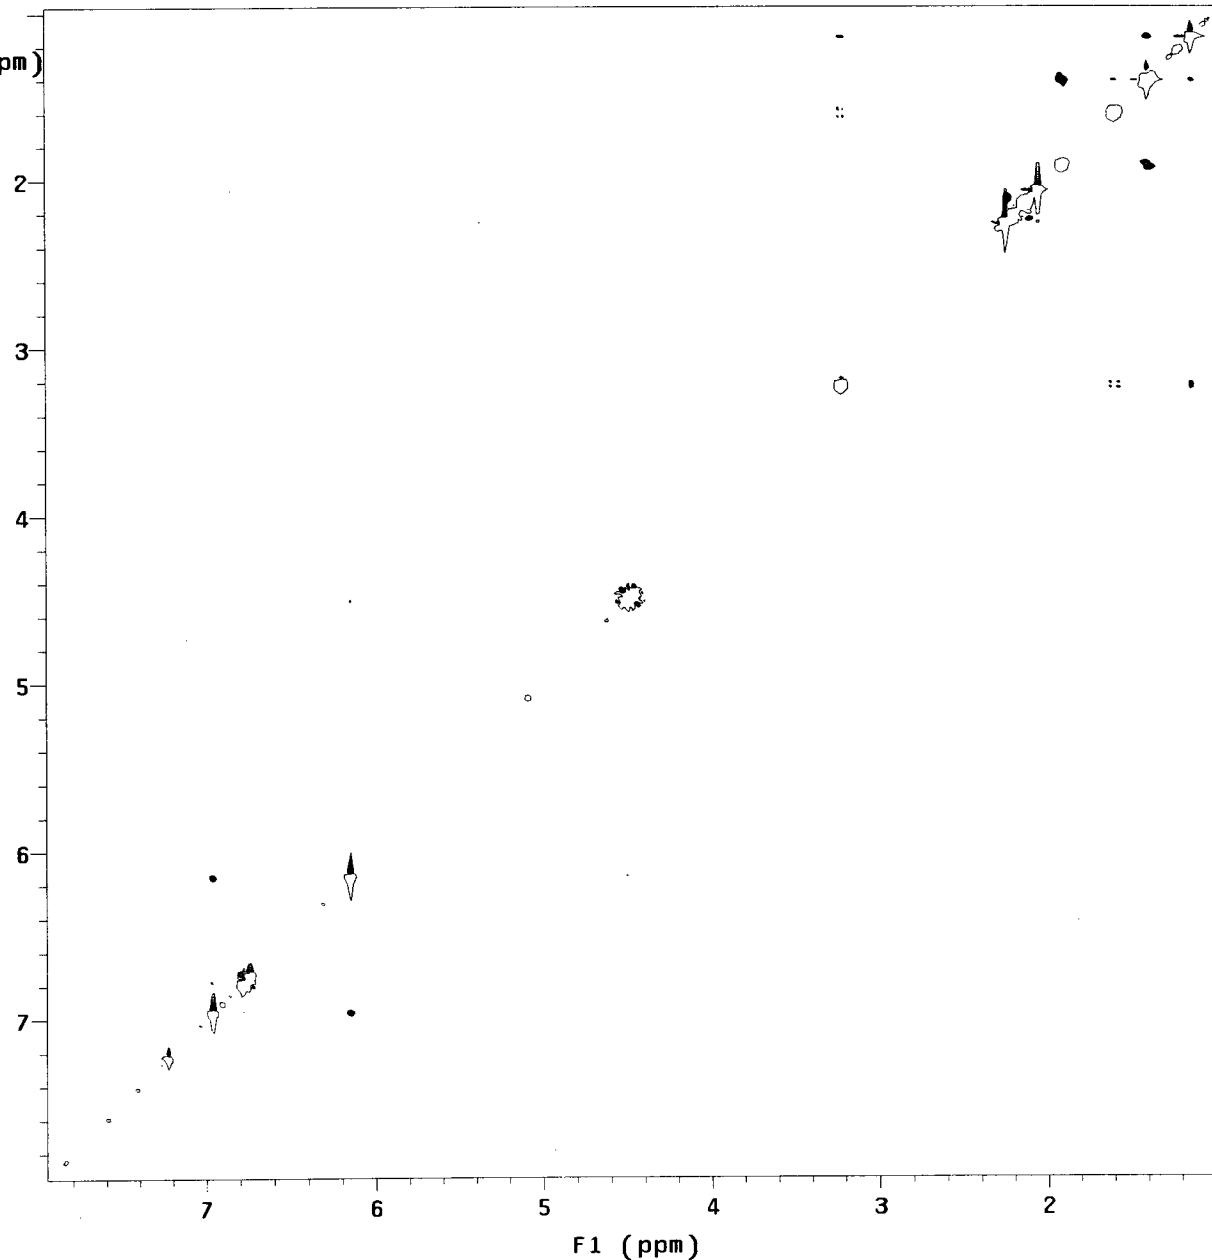

Fig S91. HMQC of compound 16 (500 MHz, CDCl<sub>3</sub>).

S91

PMK-01-269

exp17 gHMQC

| SAMPLE         |             | FLAGS         |          | ACQUISITION |       | ARRAYS |  |
|----------------|-------------|---------------|----------|-------------|-------|--------|--|
| date           | Oct 14 2009 | hs            | n        | array       | phase |        |  |
| solvent        | cdcl3       | sspul         | y        | arraydim    | 256   |        |  |
| sample         | undefined   | PFGflg        | y        |             |       |        |  |
| ACQUISITION    |             | hsglv1        | 1026     | i           | phase |        |  |
| sw             | 3498.8      | SPECIAL       |          | 1           | 1     |        |  |
| at             | 0.146       | temp          | not used | 2           | 2     |        |  |
| np             | 1024        | gain          | 54       |             |       |        |  |
| fb             | 2000        | spin          | 0        |             |       |        |  |
| ss             | 32          | GRADIENTS     |          |             |       |        |  |
| d1             | 1.000       | gzlv1         | 1026     |             |       |        |  |
| nt             | 16          | gt1           | 0.001000 |             |       |        |  |
| 2D ACQUISITION |             | gzlv13        | 516      |             |       |        |  |
| sw1            | 21367.5     | gt3           | 0.001000 |             |       |        |  |
| ni             | 128         | gstab         | 0.000500 |             |       |        |  |
| phase          |             | F2 PROCESSING |          |             |       |        |  |
| TRANSMITTER    |             | gf            | 0.068    |             |       |        |  |
| tn             | H1          | gfs           | not used |             |       |        |  |
| sfrq           | 499.835     | fn            | 1024     |             |       |        |  |
| tof            |             | F1 PROCESSING |          |             |       |        |  |
| tpwr           | 57          | gf1           | 0.006    |             |       |        |  |
| pw             | 13.000      | gfs1          | not used |             |       |        |  |
| DECOUPLER      |             | proc1         | lp       |             |       |        |  |
| dn             | C13         | fn1           | 2048     |             |       |        |  |
| dof            | -2515.1     | DISPLAY       |          |             |       |        |  |
| dm             | nny         | sp            | 511.5    |             |       |        |  |
| dmm            | ccp         | wp            | 3095.6   |             |       |        |  |
| dmf            | 32258       | sp1           | 1732.5   |             |       |        |  |
| dpwr           | 35          | wp1           | 14794.5  |             |       |        |  |
| pwxlvl         | 51          | rfl           | 2588.0   |             |       |        |  |
| pxw            | 14.700      | rfp           | 3079.0   |             |       |        |  |
| HMQC           |             | rfl1          | 17164.0  |             |       |        |  |
| j1xh           | 140.0       | rfl1          | 15891.8  |             |       |        |  |
| nullflg        |             | PLOT          |          |             |       |        |  |
|                | y           | wc            | 150.0    |             |       |        |  |
|                |             | sc            | 6.2      |             |       |        |  |
|                |             | wc2           | 116.2    |             |       |        |  |
|                |             | sc2           | 0        |             |       |        |  |
|                |             | vs            | 406      |             |       |        |  |
|                |             | th            | 5        |             |       |        |  |
|                |             | ai            | cdc ph   |             |       |        |  |

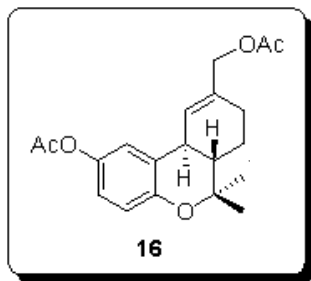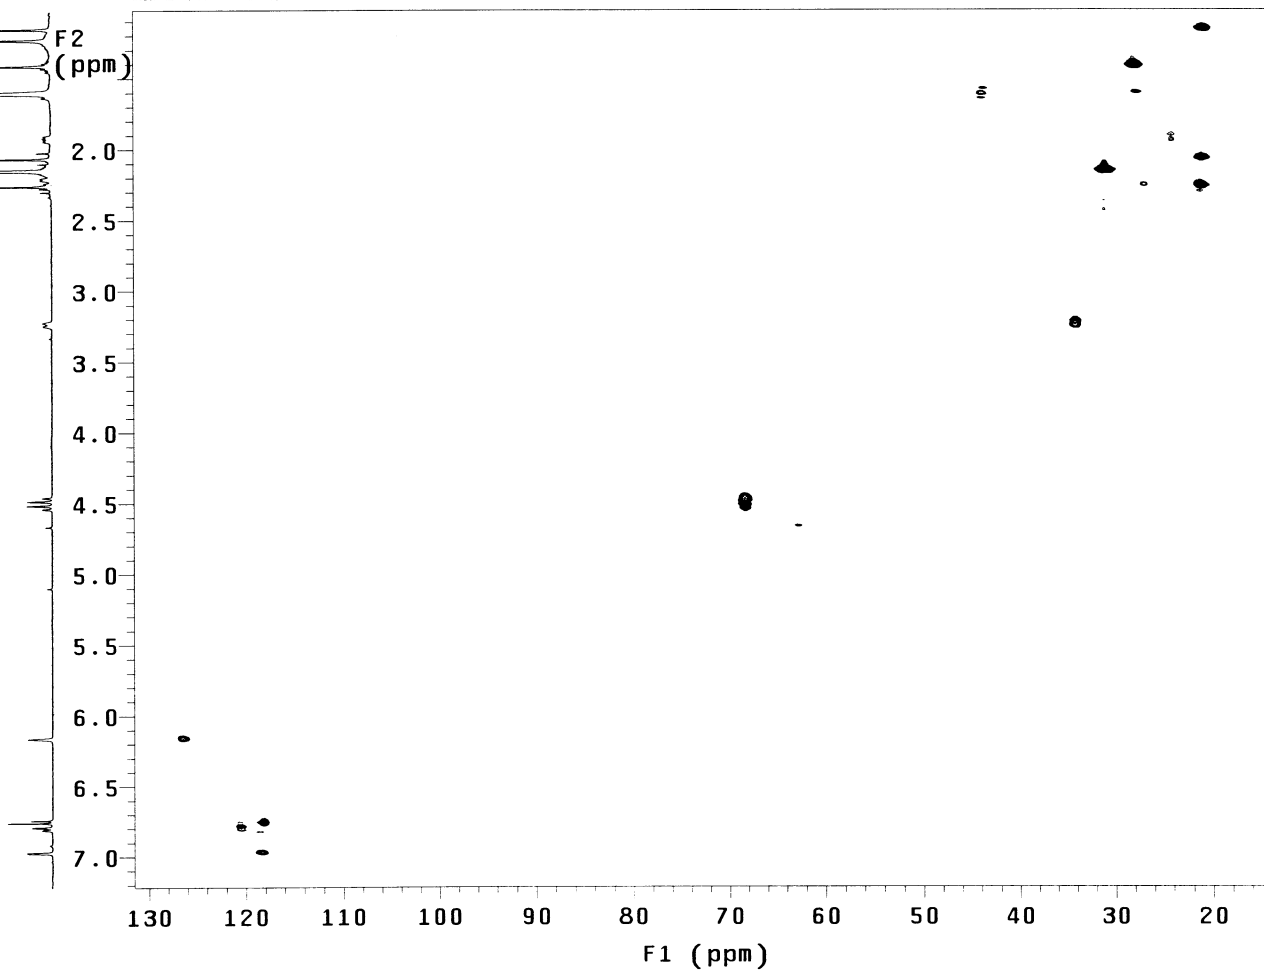

Fig S92. <sup>1</sup>H NMR of compound 17 (500 MHz, CDCl<sub>3</sub>).

S92

PMK-01-271-3rd

exp12 s2pul

|             |             |            |          |
|-------------|-------------|------------|----------|
| SAMPLE      |             | DEC. & VT  |          |
| date        | Oct 28 2009 | dfrq       | 125.693  |
| solvent     | cdcl3       | dn         | C13      |
| file        | exp         | dpwr       | 30       |
| ACQUISITION |             | dof        | 0        |
| sfrq        | 499.830     | dm         | nnn      |
| tn          | H1          | dmm        | c        |
| at          | 3.000       | dmf        | 200      |
| np          | 48000       | dseq       |          |
| sw          | 8000.0      | dres       | 1.0      |
| fb          | 4000        | homo       | n        |
| bs          | 4           | PROCESSING |          |
| tpwr        | 59          | wtfile     |          |
| pw          | 4.8         | proc       | ft       |
| d1          | 1.000       | fn         | not used |
| tof         | 499.7       | math       | f        |
| nt          | 4           |            |          |
| ct          | 4           | werr       | react    |
| alock       | y           | wexp       | procplot |
| gain        | not used    | wbs        |          |
| FLAGS       |             | wnt        | wft      |
| il          | n           |            |          |
| in          | n           |            |          |
| dp          | y           |            |          |
| hs          | nn          |            |          |
| DISPLAY     |             |            |          |
| sp          | -250.1      |            |          |
| wp          | 4998.0      |            |          |
| vs          | 184         |            |          |
| sc          | 0           |            |          |
| wc          | 210         |            |          |
| hzmm        | 23.80       |            |          |
| is          | 104.54      |            |          |
| rfl         | 4637.5      |            |          |
| rfp         | 3618.7      |            |          |
| th          | 4           |            |          |
| ins         | 100.000     |            |          |
| nm          | ph          |            |          |

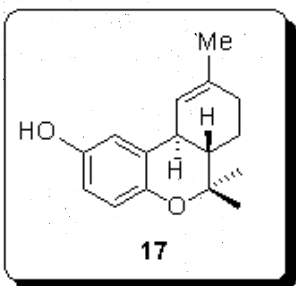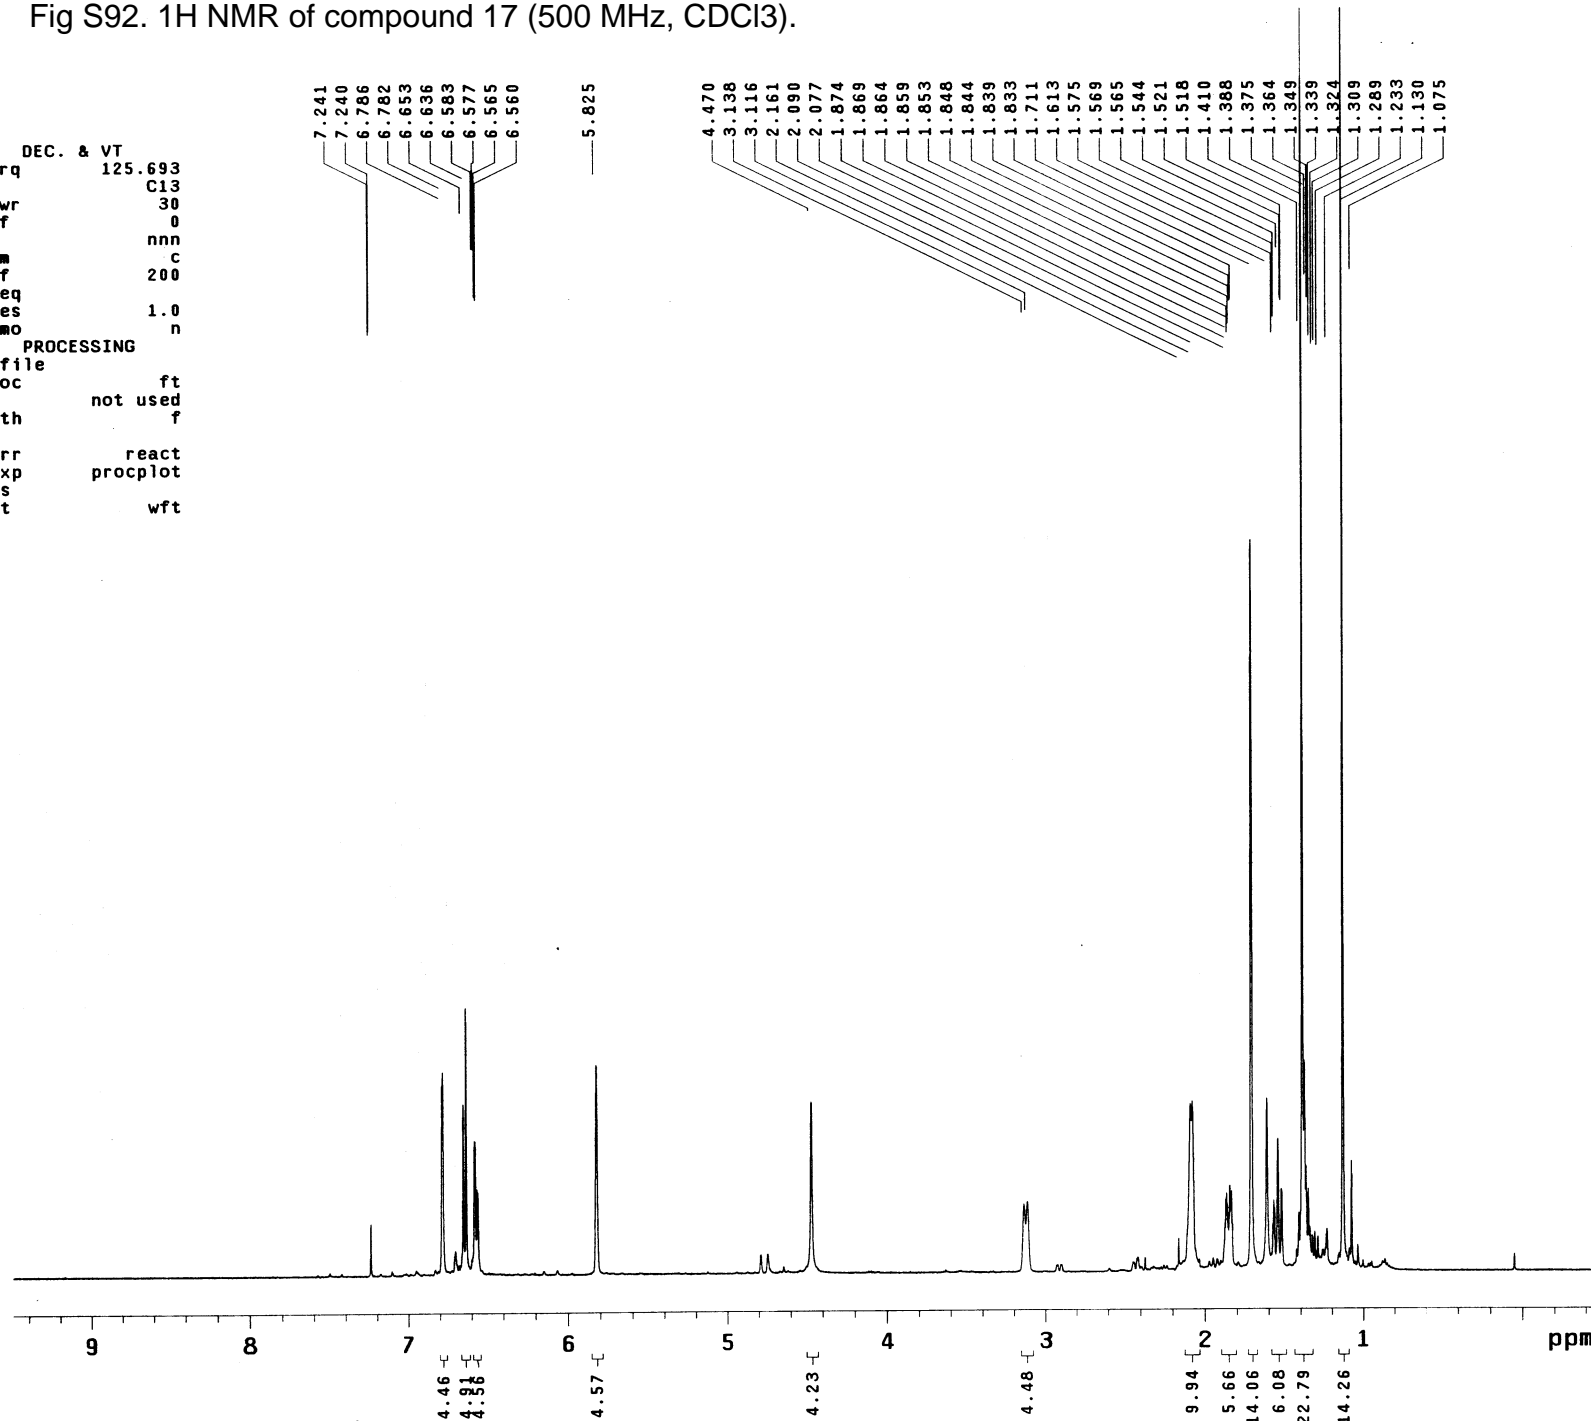

Fig S93. <sup>13</sup>C NMR of compound 17 (125 MHz, CDCl<sub>3</sub>).

S93

PMK-01-271-3rd

exp13 s2pul

| SAMPLE      |             | DEC. & VT  |          |
|-------------|-------------|------------|----------|
| date        | Oct 28 2009 | dfrq       | 499.829  |
| solvent     | cdcl3       | dn         | H1       |
| file        | exp         | dpwr       | 39       |
| ACQUISITION |             | dof        | 0        |
| sfrq        | 125.696     | dm         | yyy      |
| tn          | C13         | dmm        | w        |
| at          | 1.000       | dmf        | 11905    |
| np          | 62894       | dseq       |          |
| sw          | 31446.5     | dres       | 1.0      |
| fb          | 17000       | homo       | n        |
| bs          | 16          | PROCESSING |          |
| ss          | 2           | lb         | 1.00     |
| tpwr        | 54          | wtfile     |          |
| pw          | 4.0         | proc       | ft       |
| d1          | 1.000       | fn         | not used |
| tof         | 2512.2      | math       | f        |
| nt          | 20000       |            |          |
| ct          | 1376        | werr       | react    |
| alock       | y           | wexp       | procplot |
| gain        | not used    | wbs        | testsn   |
| FLAGS       |             | wnt        |          |
| il          | n           |            |          |
| in          | n           |            |          |
| dp          | y           |            |          |
| hs          | nn          |            |          |
| DISPLAY     |             |            |          |
| sp          | -1257.0     |            |          |
| wp          | 27649.1     |            |          |
| vs          | 200         |            |          |
| sc          | 0           |            |          |
| wc          | 210         |            |          |
| hzmm        | 131.67      |            |          |
| is          | 500.00      |            |          |
| rfl         | 10982.5     |            |          |
| rfp         | 9677.5      |            |          |
| th          | 6           |            |          |
| ins         | 100.000     |            |          |
| nm          | ph          |            |          |

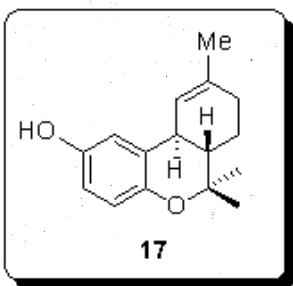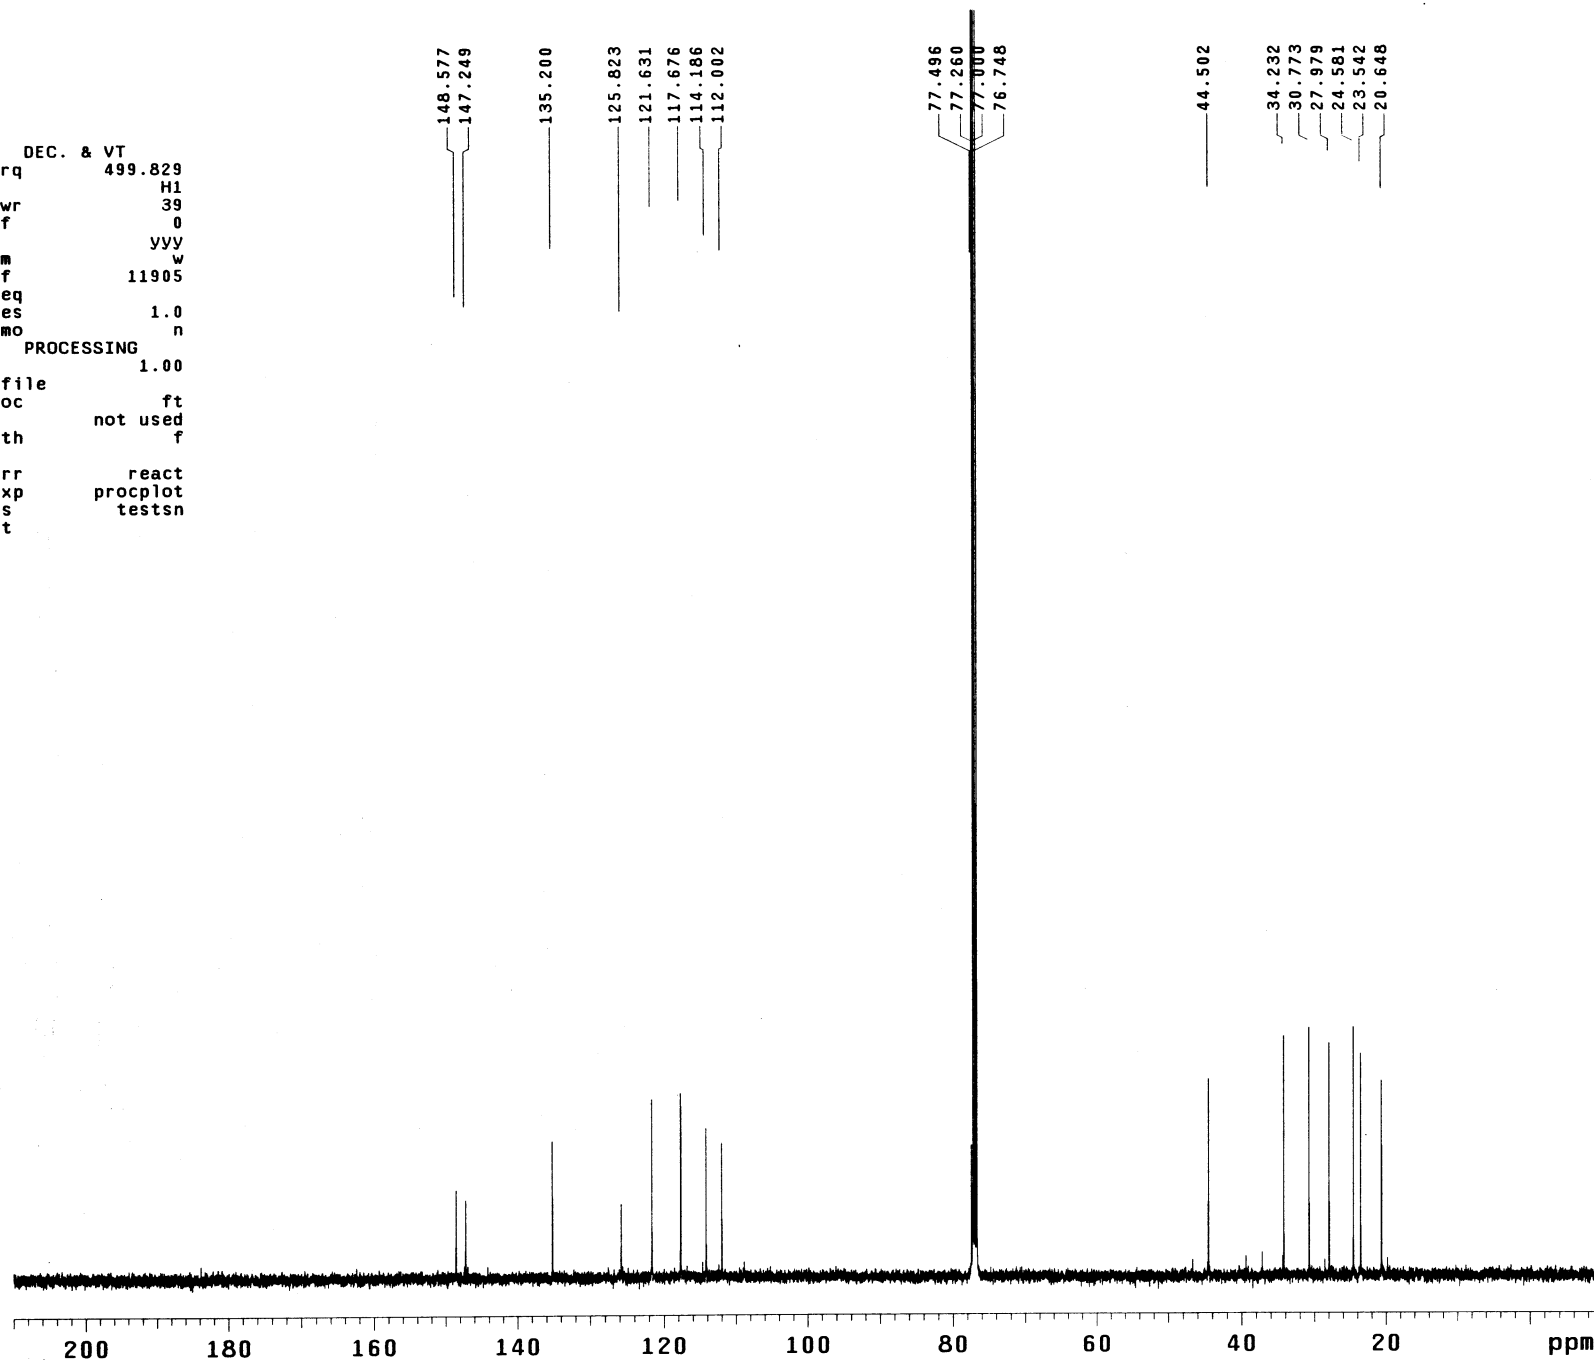

Fig S94. <sup>13</sup>C NMR of compound 17 (125 MHz, CDCl<sub>3</sub>), expanded.

S94

PMK-01-271-3rd

exp13 s2pu1

| SAMPLE      |             | DEC. & VT  |          |
|-------------|-------------|------------|----------|
| date        | Oct 28 2009 | dfrq       | 499.829  |
| solvent     | cdcl3       | dn         | H1       |
| file        | exp         | dpwr       | 39       |
| ACQUISITION |             |            |          |
| sfrq        | 125.696     | dof        | 0        |
| tn          | C13         | dm         | YVY      |
| at          | 1.000       | dmm        | w        |
| np          | 62894       | dmf        | 11905    |
| sw          | 31446.5     | dseq       |          |
| fb          | 17000       | dres       | 1.0      |
| bs          | 16          | homo       | n        |
| ss          | 2           | PROCESSING |          |
| tpwr        | 54          | lb         | 1.00     |
| pw          | 4.0         | wtfile     |          |
| d1          | 1.000       | proc       | ft       |
| tof         | 2512.2      | fn         | not used |
| nt          | 20000       | math       | f        |
| ct          | 1392        | werr       | react    |
| alock       | y           | wexp       | procplot |
| gain        | not used    | wbs        | testsn   |
|             | FLAGS       | wnt        |          |
| il          | n           |            |          |
| in          | n           |            |          |
| dp          | y           |            |          |
| hs          | nn          |            |          |
| DISPLAY     |             |            |          |
| sp          | 8797.5      |            |          |
| wp          | 1256.2      |            |          |
| vs          | 100         |            |          |
| sc          | 0           |            |          |
| wc          | 210         |            |          |
| hzmm        | 5.98        |            |          |
| is          | 500.00      |            |          |
| rfl         | 10982.5     |            |          |
| rfp         | 9677.5      |            |          |
| th          | 6           |            |          |
| ins         | 100.000     |            |          |
| nm          | ph          |            |          |

77.496  
77.260  
77.000  
76.748

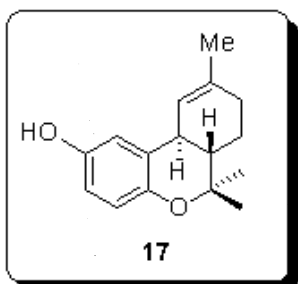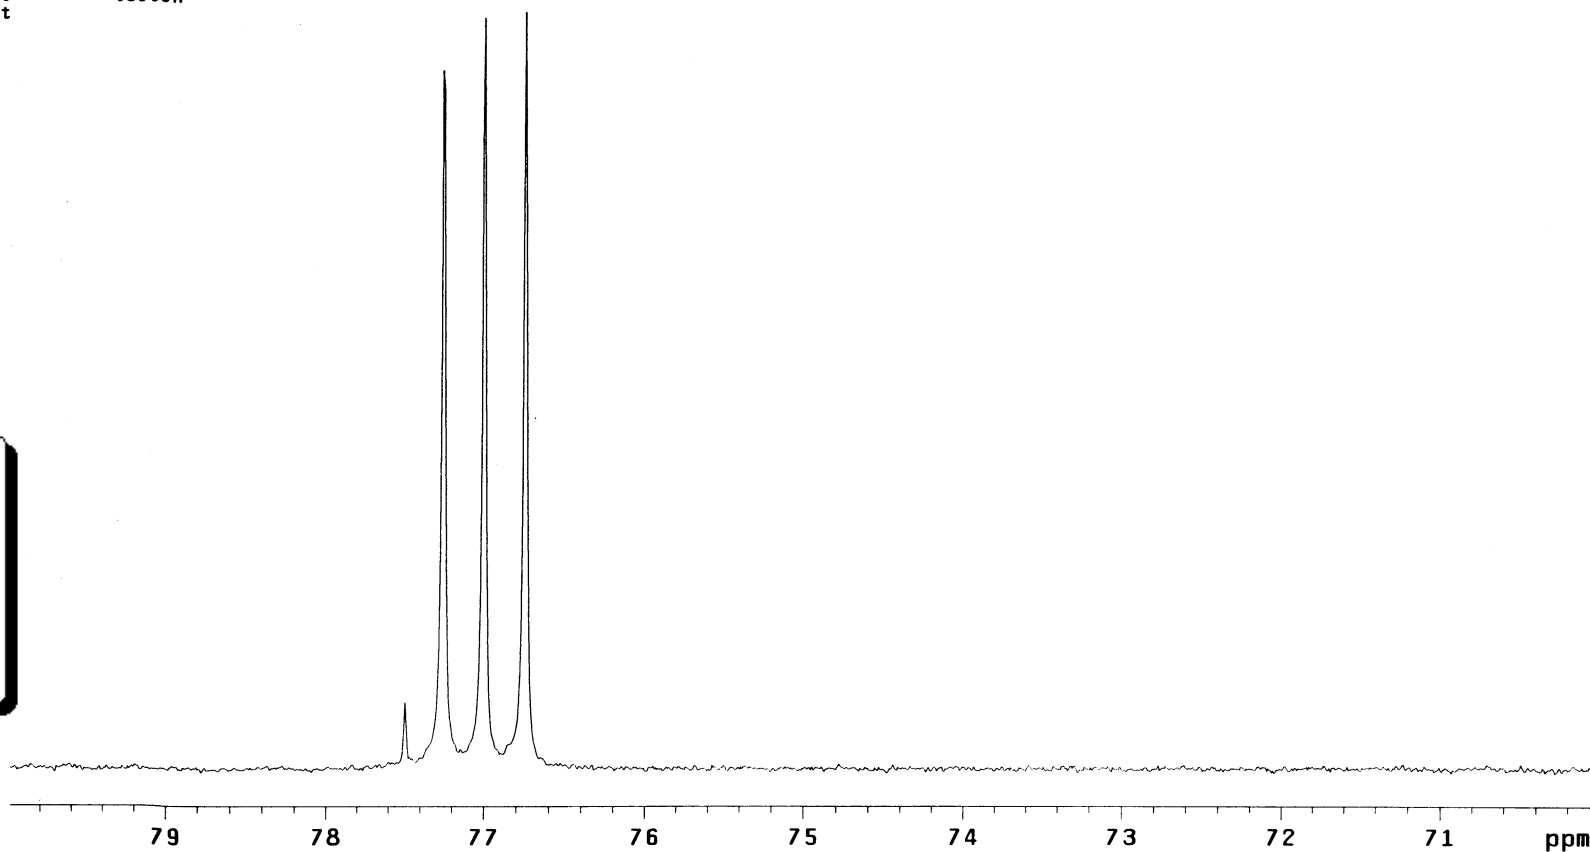

Fig S95. DEPT of compound 17 (CDCl<sub>3</sub>).

S95

PMK-01-271-3rd

exp14 DEPT

| SAMPLE      |             | DEPT          | ACQUISITION ARRAYS |      |
|-------------|-------------|---------------|--------------------|------|
| date        | Oct 28 2009 | j1xh 140.0    | array              | mult |
| solvent     | cdcl3       | mult arrayed  | arraydim           | 3    |
| sample      | undefined   | SPECIAL       |                    |      |
| ACQUISITION |             | temp not used | 1                  | mult |
| sw          | 31446.5     | gain 54       | 1                  | 0.5  |
| at          | 1.000       | spin 0        | 2                  | 1    |
| np          | 62894       | PROCESSING    | 3                  | 1.5  |
| bs          | 16          | lb 1.00       |                    |      |
| ss          | -4          | fn not used   |                    |      |
| d1          | 1.000       | SPECTRUM      |                    |      |
| nt          | 300         | wp 27649.1    |                    |      |
| ct          | 300         | sp -1257.0    |                    |      |
| TRANSMITTER |             | rp 22.0       |                    |      |
| tn          | C13         | lp 115.8      |                    |      |
| tof         | 2512.2      | ai ph         |                    |      |
| tpwr        | 54          | REFERENCE     |                    |      |
| pw          | 10.500      | rfl 1305.0    |                    |      |
| DECOUPLER   |             | rtp 0         |                    |      |
| dn          | H1          | PLOT          |                    |      |
| dof         | 0           | wc 210        |                    |      |
| dpwr        | 39          | sc 0          |                    |      |
| dm          | nny         | vs 210        |                    |      |
| dmm         | ccw         | hzmm 131.67   |                    |      |
| dmf         | 11905       | th 6          |                    |      |
| pplv1       | 51          |               |                    |      |
| pp          | 24.000      |               |                    |      |

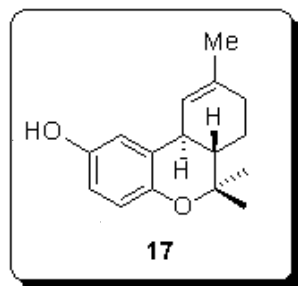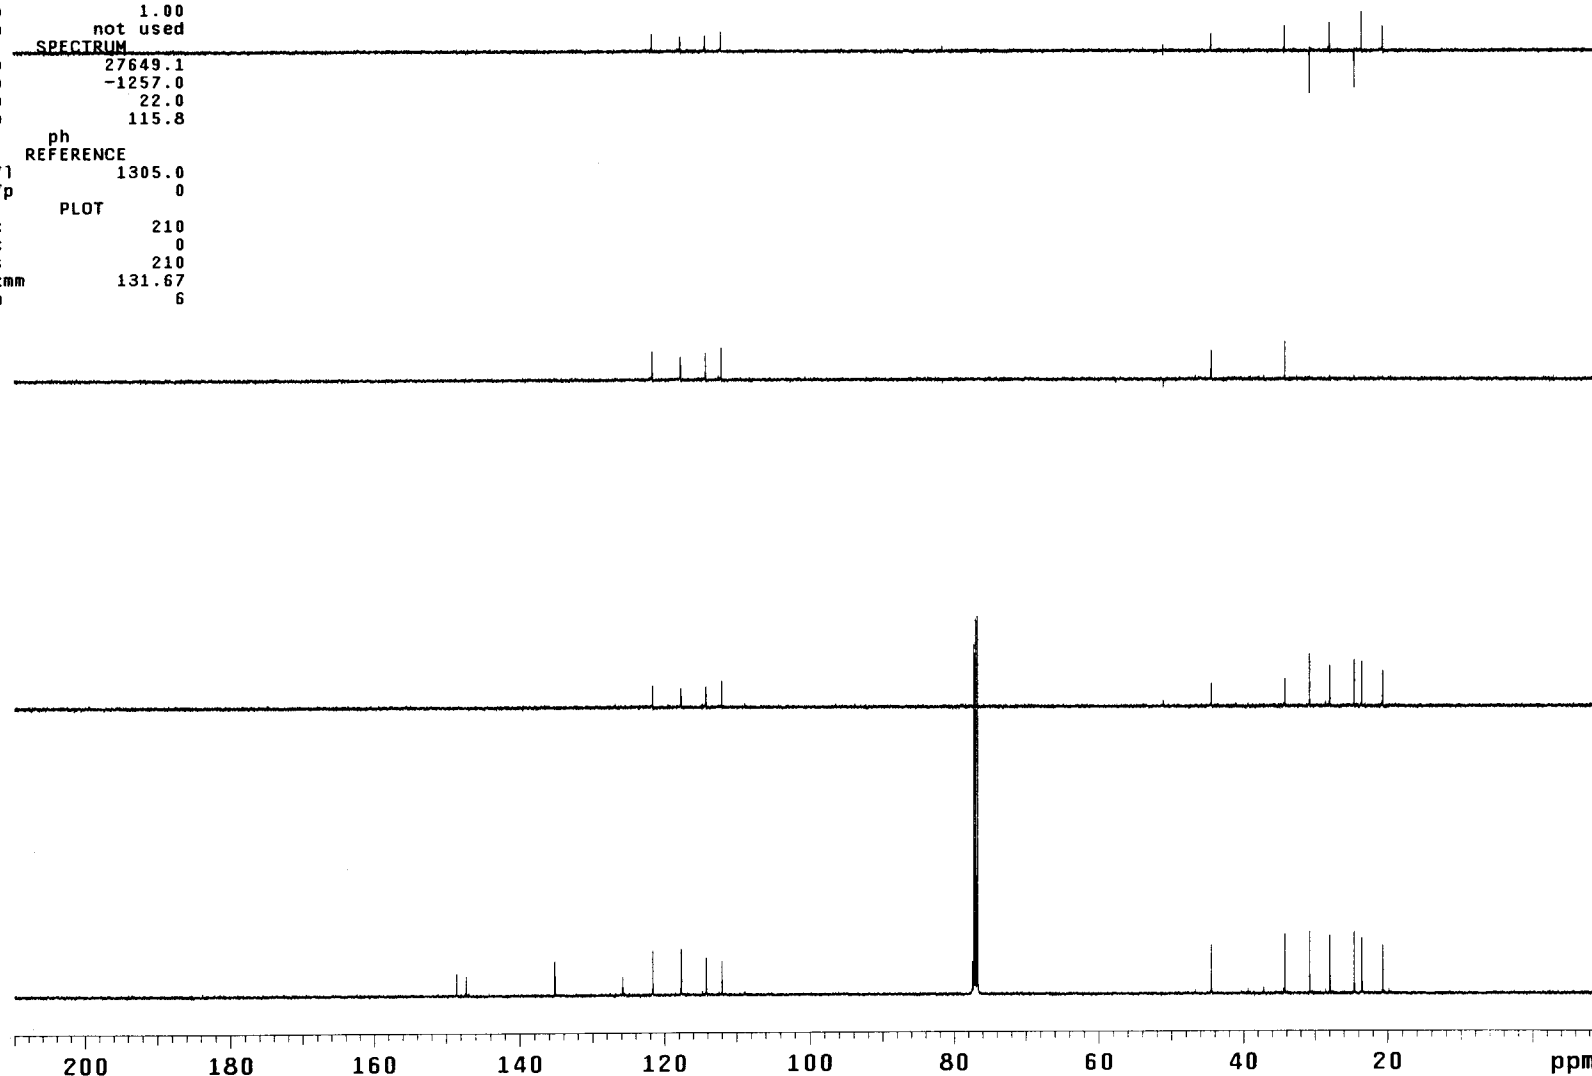

exp14 DEPT

| SAMPLE      |             | DEPT       | ACQUISITION ARRAYS |      |
|-------------|-------------|------------|--------------------|------|
| date        | Oct 28 2009 | j1xh       | 140.0              |      |
| solvent     | cdc13       | mult       | arrayed            | mult |
| sample      | undefined   |            | arraydim           | 3    |
| ACQUISITION |             | temp       | not used           | i    |
| sw          | 31446.5     | gain       | 54                 | 1    |
| at          | 1.000       | spin       | 0                  | 2    |
| np          | 62894       | PROCESSING | 3                  | 1.5  |
| bs          | 16          | lb         | 1.00               |      |
| ss          | -4          | fn         | not used           |      |
| dl          | 1.000       | SPECIAL    |                    |      |
| nt          | 300         | wp         | 1256.2             |      |
| ct          | 300         | sp         | 8797.5             |      |
| TRANSMITTER |             | rp         | -16.5              |      |
| tn          | C13         | lp         | 207.1              |      |
| tof         | 2512.2      | ai         | ph                 |      |
| tpwr        | 54          | REFERENCE  |                    |      |
| pw          | 10.500      | rfl        | 1305.0             |      |
| DECOUPLER   |             | rff        | 0                  |      |
| dn          | H1          | PLOT       |                    |      |
| dof         | 0           | wc         | 210                |      |
| dpwr        | 39          | sc         | 0                  |      |
| dm          | nny         | vs         | 178                |      |
| dmm         | ccw         | hzmm       | 5.98               |      |
| dmt         | 11905       | th         | 6                  |      |
| pp1v1       | 51          |            |                    |      |
| pp          | 24.000      |            |                    |      |

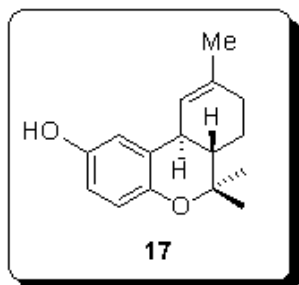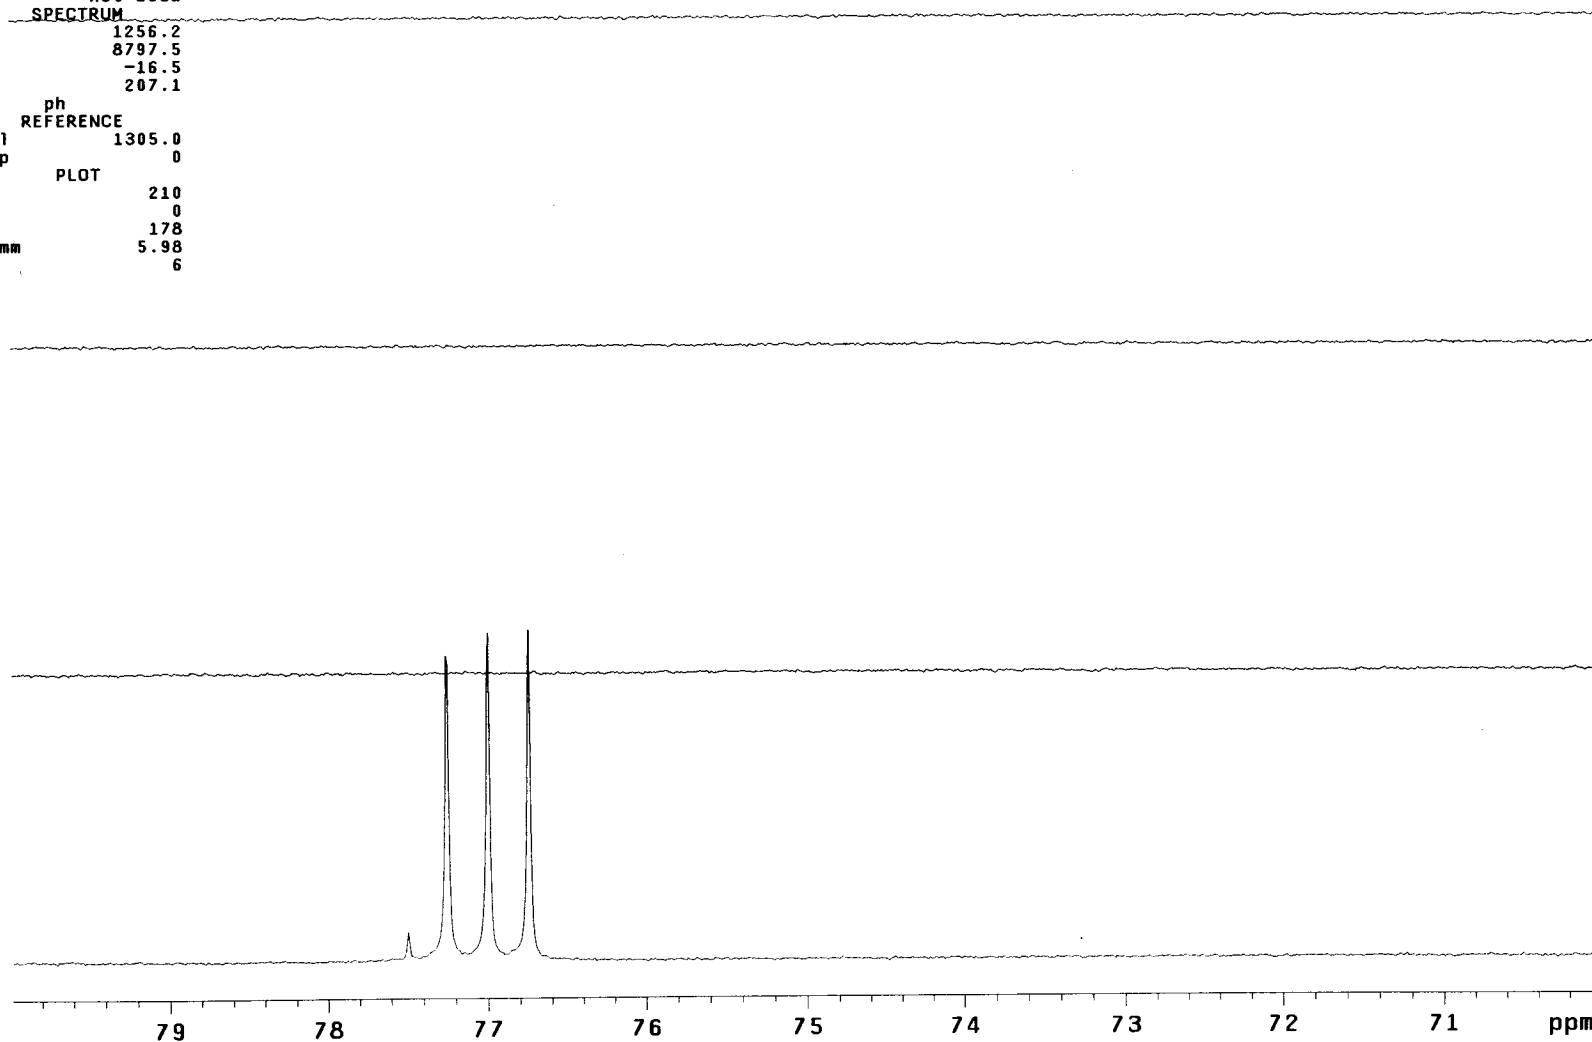

Fig S97. COSY of compound 17 (CDCl<sub>3</sub>).

S97

PMK-01-271-3rd

exp16 gCOSY

SAMPLE  
date Oct 28 2009  
solvent cdc13  
sample undefined

ACQUISITION  
sw 2999.0  
at 0.171  
np 1024  
fb 2000  
ss 16  
dl 1.000  
nt 8

2D ACQUISITION  
sw1 2999.0  
ni 128

TRANSMITTER  
tn H1  
sfrq 499.829  
tof -499.9  
tpwr 59  
pw 13.500

GRADIENTS  
gzlv11 1026  
gt1 0.001000  
gstab 0.000500

DECOUPLER  
dn C13  
dm nnn

FLAGS  
hs nn  
sspu1 n  
hsglv1 1026

SPECIAL  
temp not used  
gain 34  
spin 0  
F2 PROCESSING  
sb -0.085  
sbs not used  
fn 1024

F1 PROCESSING  
sb1 -0.043  
sbs1 not used  
proc1 lp  
fn1 1024

DISPLAY  
sp 479.8  
wp 2993.1  
sp1 478.7  
wp1 2993.1  
rf1 1760.3  
rfp 2234.2  
rf11 1761.4  
rfp1 2234.2

PLOT  
wc 155.0  
sc 10.0  
wc2 155.0  
sc2 0  
vs 170  
th 5  
ai cdc av

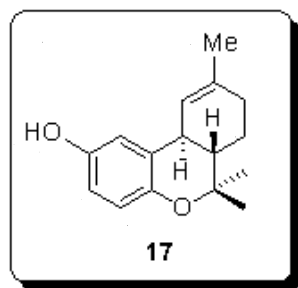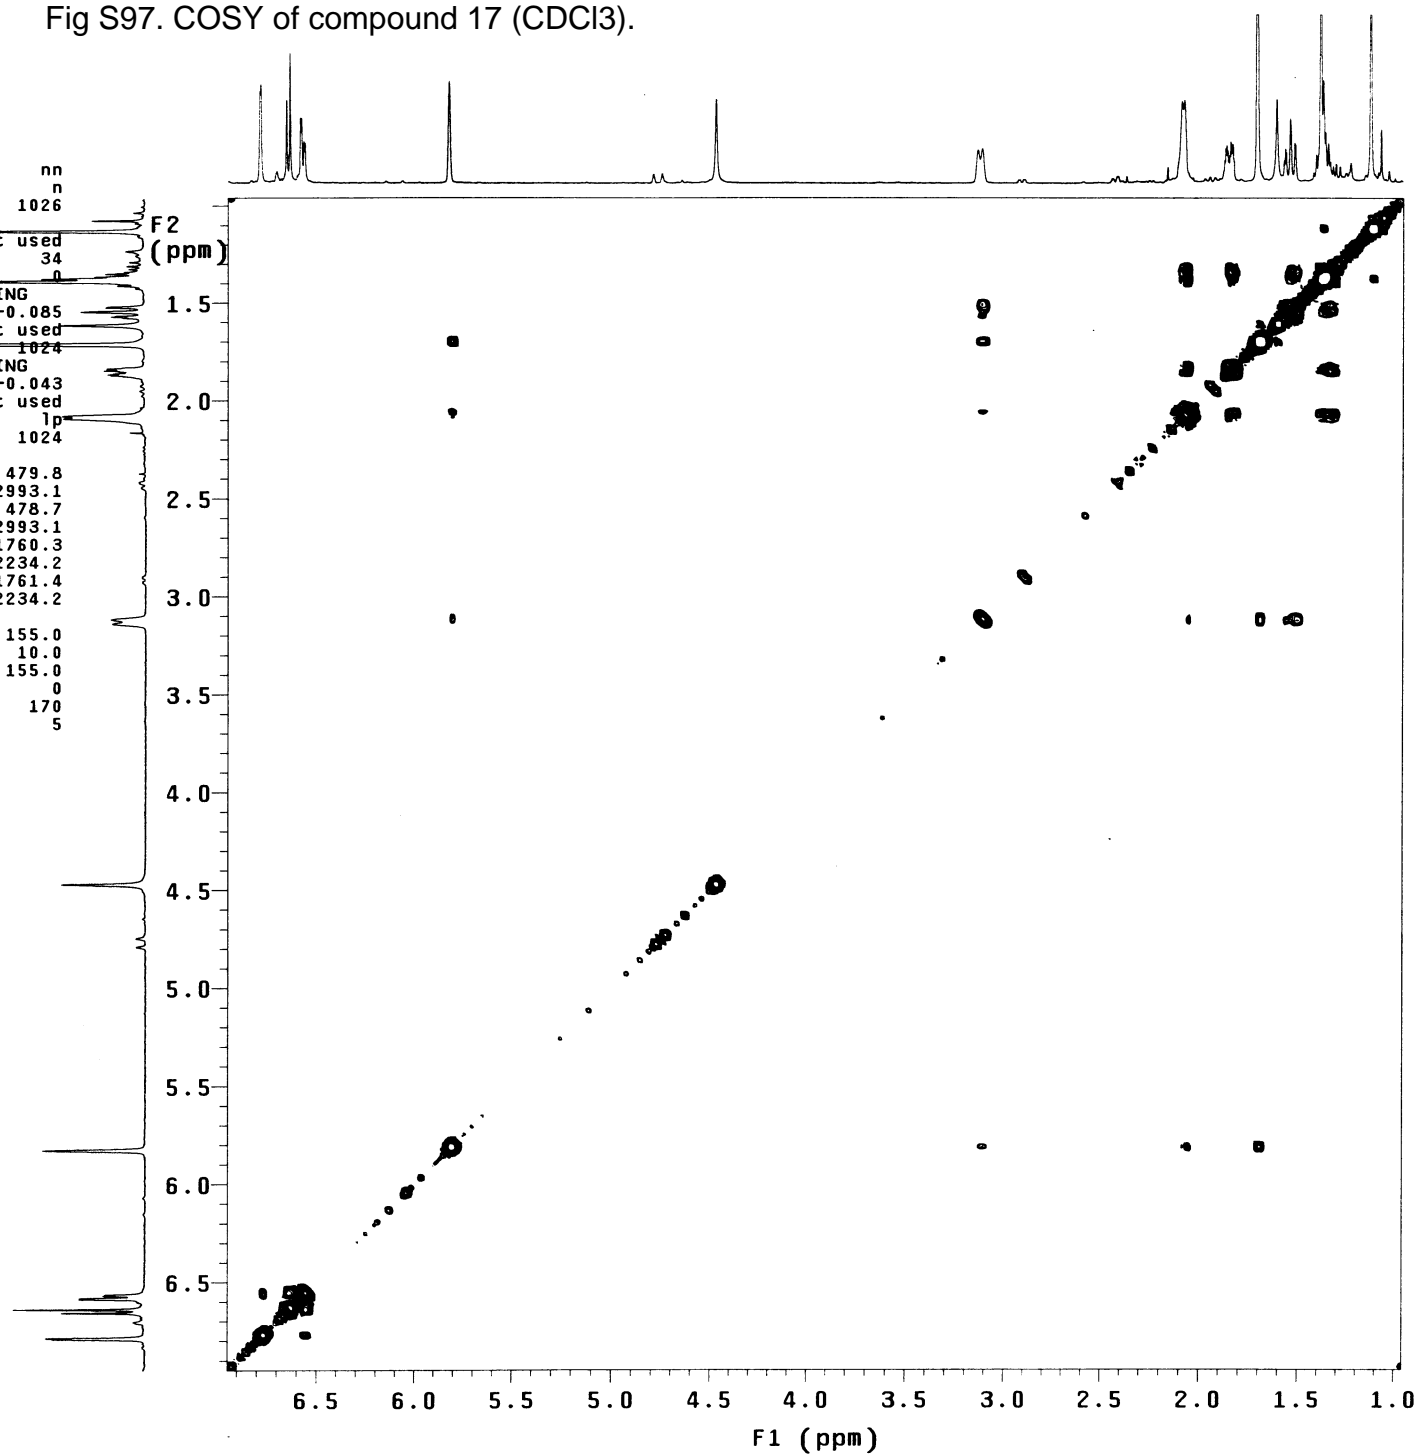

Fig S98. NOESY of compound 17 (CDCl<sub>3</sub>).

S98

PMK-01-271-3rd

exp2 NOESY

| SAMPLE         |             | FLAGS         |          |
|----------------|-------------|---------------|----------|
| date           | Oct 28 2009 | hs            | n        |
| solvent        | cdcl3       | sspul         | y        |
| sample         | undefined   | PFGflg        | y        |
| ACQUISITION    |             | hsglv1        | 1026     |
| sw             | 2999.0      | SPECIAL       |          |
| at             | 0.171       | temp          | 20.0     |
| np             | 1024        | gain          | 34       |
| fb             | 2000        | spin          | 0        |
| ss             | 32          | F2 PROCESSING |          |
| d1             | 1.000       | gf            | 0.079    |
| nt             | 8           | gfs           | not used |
| 2D ACQUISITION |             | fn            | 1024     |
| sw1            | 2999.0      | F1 PROCESSING |          |
| ni             | 200         | gf1           | 0.031    |
| TRANSMITTER    |             | gfs1          | not used |
| tn             | H1          | fn1           | 1024     |
| sfrq           | 499.829     | DISPLAY       |          |
| tof            | -499.9      | sp            | 494.4    |
| tpwr           | 59          | wp            | 2922.8   |
| pw             | 13.500      | sp1           | 495.8    |
| NOESY          |             | wp1           | 2928.7   |
| mix            | 0.600       | rfl           | 1751.5   |
| PRESATURATION  |             | rfp           | 2234.2   |
| satmode        | nnnn        | rfl1          | 1750.1   |
| satpwr         | 0           | rfp1          | 2234.2   |
| satdly         | 0           | PLOT          |          |
| satfrq         | 0           | wc            | 155.0    |
| DECOUPLER      |             | sc            | 10.0     |
| dn             | C13         | wc2           | 155.0    |
| dm             | nnn         | sc2           | 0        |
|                |             | vs            | 170      |
|                |             | th            | 4        |
|                |             | ai            | ph       |

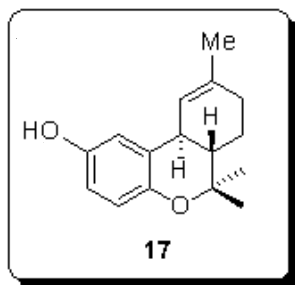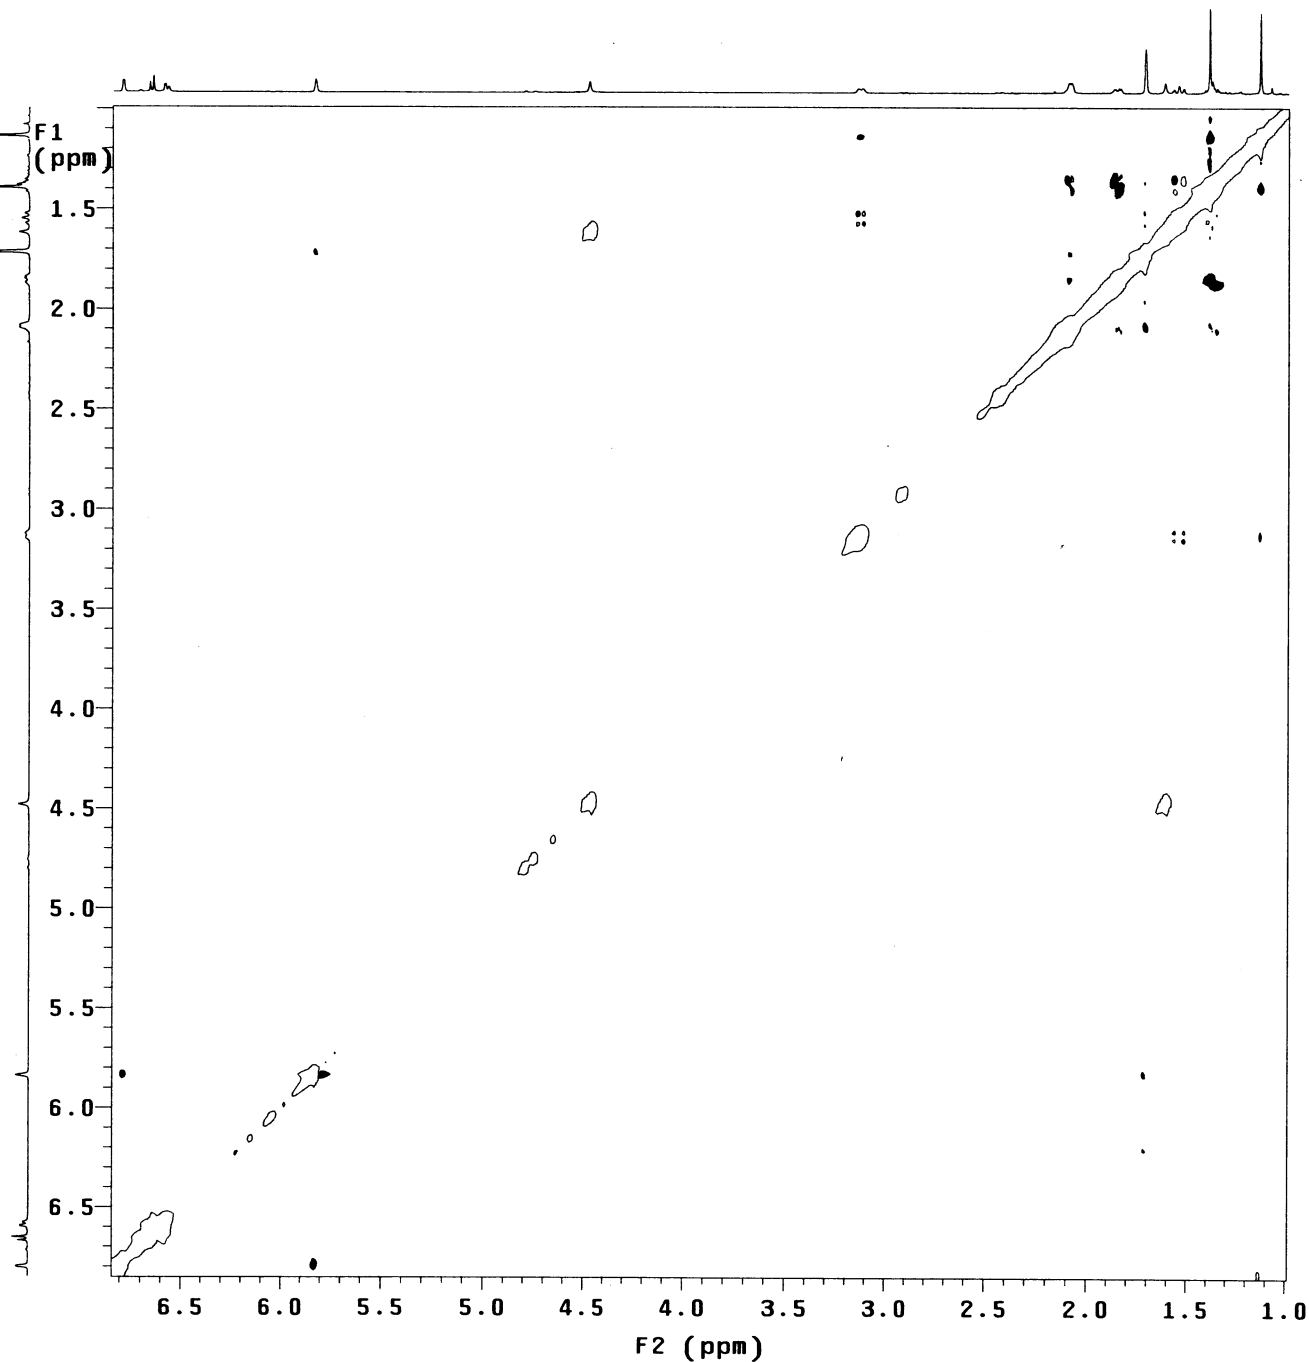

Fig S99. <sup>1</sup>H NMR of compound 20 (500 MHz, CDCl<sub>3</sub>).

S99

pmk-01-72

exp41 s2pu1

| SAMPLE      |             | DEC. & VT  |          |
|-------------|-------------|------------|----------|
| date        | May 23 2008 | dfrq       | 125.695  |
| solvent     | cdcl3       | dn         | C13      |
| file        | exp         | dpwr       | 30       |
| ACQUISITION |             | do         | 0        |
| sfrq        | 499.836     | dm         | nnn      |
| tn          | H1          | dmm        | c        |
| at          | 3.000       | dmf        | 200      |
| np          | 48000       | dseq       |          |
| sw          | 8000.0      | dres       | 1.0      |
| fb          | not used    | homo       | n        |
| bs          | 4           | PROCESSING |          |
| tpwr        | 57          | wtfile     |          |
| pw          | 4.8         | proc       | ft       |
| d1          | 1.000       | fn         | not used |
| tof         | 499.7       | math       | f        |
| nt          | 500         |            |          |
| ct          | 12          | werr       | react    |
| alock       | y           | wexp       | procplot |
| gain        | not used    | wbs        |          |
| FLAGS       |             | wnt        | wft      |
| il          | n           |            |          |
| in          | n           |            |          |
| dp          | y           |            |          |
| hs          | nn          |            |          |
| DISPLAY     |             |            |          |
| sp          | -250.1      |            |          |
| wp          | 5498.0      |            |          |
| vs          | 282         |            |          |
| sc          | 0           |            |          |
| wc          | 210         |            |          |
| hzmm        | 26.18       |            |          |
| is          | 146.28      |            |          |
| rfl         | 4627.0      |            |          |
| rfp         | 3618.8      |            |          |
| th          | 5           |            |          |
| ins         | 100.000     |            |          |
| nm          | ph          |            |          |

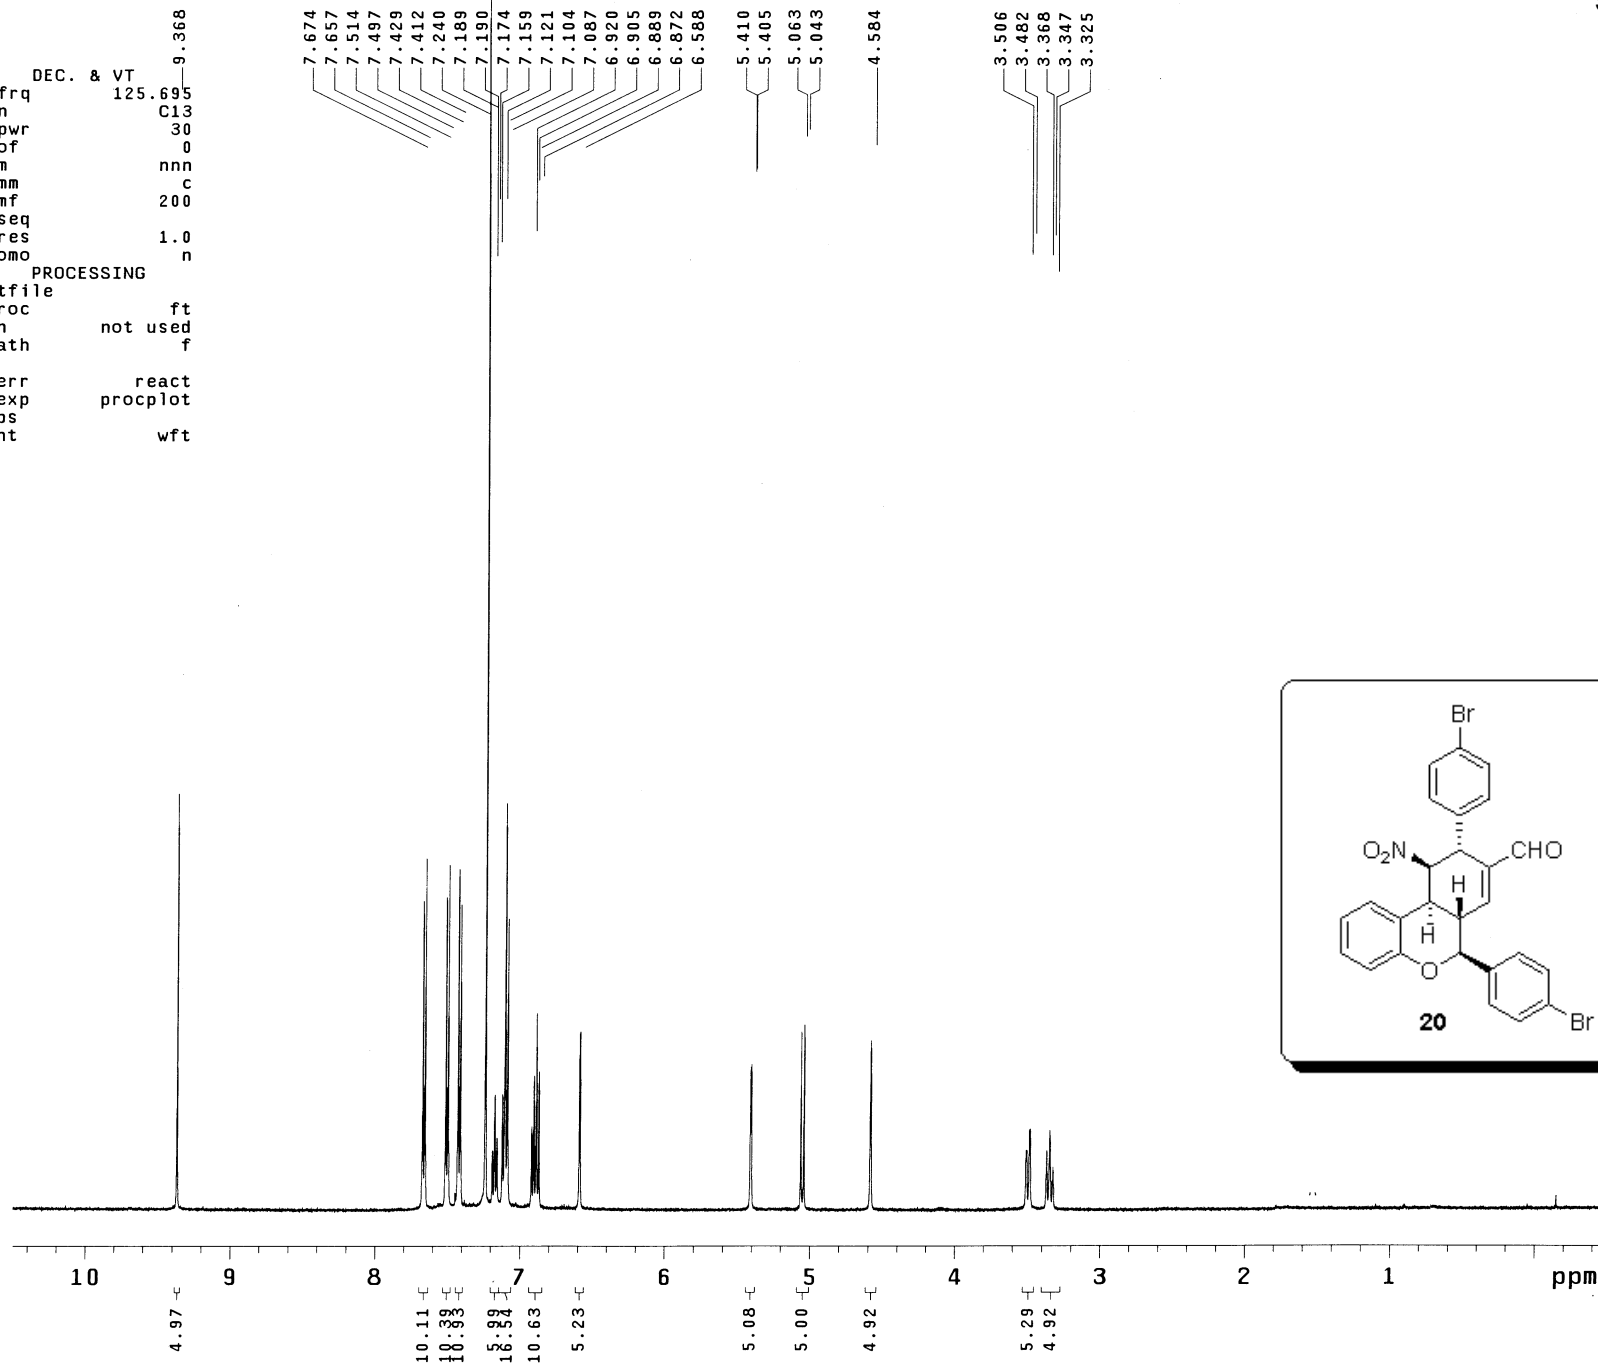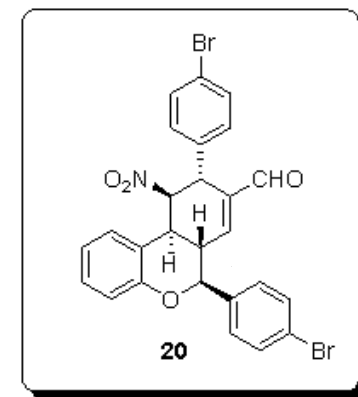

Fig S100. <sup>13</sup>C NMR of compound 20 (125 MHz, CDCl<sub>3</sub>).

S100

pmk-01-72  
exp31 s2pu1

| SAMPLE      |             | DEC. & VT |          |
|-------------|-------------|-----------|----------|
| date        | May 15 2008 | dfrq      | 499.836  |
| solvent     | cdcl3       | dn        | H1       |
| file        | exp         | dpwr      | 37       |
| ACQUISITION |             |           |          |
| sfrq        | 125.698     | dof       | 0        |
| tn          | C13         | dm        | yyy      |
| at          | 1.000       | dmm       | w        |
| np          | 62894       | dmf       | 10870    |
| sw          | 31446.5     | dseq      |          |
| fb          | not used    | dres      | 1.0      |
| bs          | 16          | homo      | n        |
| PROCESSING  |             |           |          |
| ss          | 2           | lb        | 1.00     |
| tpwr        | 53          | wtfile    |          |
| pw          | 4.0         | proc      | ft       |
| d1          | 1.000       | fn        | not used |
| tof         | 2512.2      | math      | f        |
| nt          | 10000       |           |          |
| ct          | 10000       | werr      | react    |
| alock       | y           | wexp      | procplot |
| gain        | not used    | wbs       | testsn   |
|             | FLAGS       | wnt       |          |
| il          | n           |           |          |
| in          | n           |           |          |
| dp          | y           |           |          |
| hs          | nn          |           |          |
| DISPLAY     |             |           |          |
| sp          | -1256.9     |           |          |
| wp          | 28906.3     |           |          |
| vs          | 425         |           |          |
| sc          | 0           |           |          |
| wc          | 210         |           |          |
| hzmm        | 137.65      |           |          |
| is          | 500.00      |           |          |
| rfl         | 10978.7     |           |          |
| rfp         | 9677.6      |           |          |
| th          | 5           |           |          |
| ins         | 100.000     |           |          |
| nm          | ph          |           |          |

191.153

154.448  
146.851  
139.933  
137.474  
136.405  
132.565  
132.404  
129.426  
129.304  
129.266  
124.532  
123.669  
122.447  
121.134  
118.431  
117.309

84.880  
81.299  
77.260  
77.000  
76.748

42.495  
39.593  
35.821

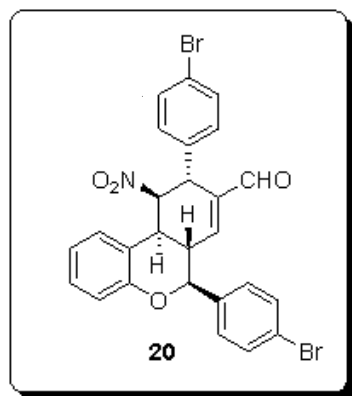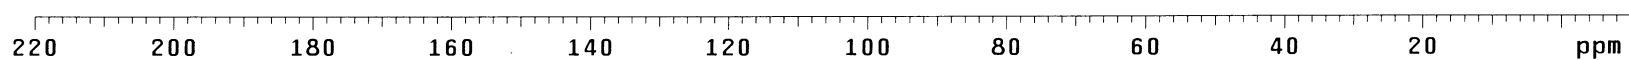

Fig S101. DEPT of compound 20 (CDCl<sub>3</sub>).

S101

pmk-01-72  
exp27 DEPT

| SAMPLE      |             | DEPT       |          | ACQUISITION ARRAYS |      |
|-------------|-------------|------------|----------|--------------------|------|
| date        | May 15 2008 | j1xh       | 140.0    | array              | mult |
| solvent     | cdcl3       | mult       | arrayed  | arraydim           | 3    |
| sample      | undefined   | SPECIAL    |          |                    |      |
| ACQUISITION |             | temp       | not used | i                  | mult |
| sw          | 31446.5     | gain       | 34       | 1                  | 0.5  |
| at          | 1.000       | spin       | 0        | 2                  | 1    |
| np          | 62894       | PROCESSING |          | 3                  | 1.5  |
| bs          | 16          | lb         | 1.00     |                    |      |
| ss          | -4          | fn         | not used |                    |      |
| d1          | 1.000       | SPECTRUM   |          |                    |      |
| nt          | 1000        | wp         | 28906.3  |                    |      |
| ct          | 1000        | sp         | -1257.2  |                    |      |
| TRANSMITTER |             | rp         | -174.2   |                    |      |
| tn          | C13         | lp         | 133.2    |                    |      |
| tof         | 2512.2      | ai         | cdc ph   |                    |      |
| tpwr        | 53          | REFERENCE  |          |                    |      |
| pw          | 8.600       | rfl        | 1269.7   |                    |      |
| DECOUPLER   |             | rfp        | 0        |                    |      |
| dn          | H1          | PLOT       |          |                    |      |
| dof         | 0           | wc         | 210      |                    |      |
| dpwr        | 37          | sc         | 0        |                    |      |
| dm          | nny         | vs         | 99543    |                    |      |
| dmm         | ccw         | hzmm       | 137.65   |                    |      |
| dmf         | 10870       | th         | 6        |                    |      |
| pplvl       | 51          |            |          |                    |      |
| pp          | 21.300      |            |          |                    |      |

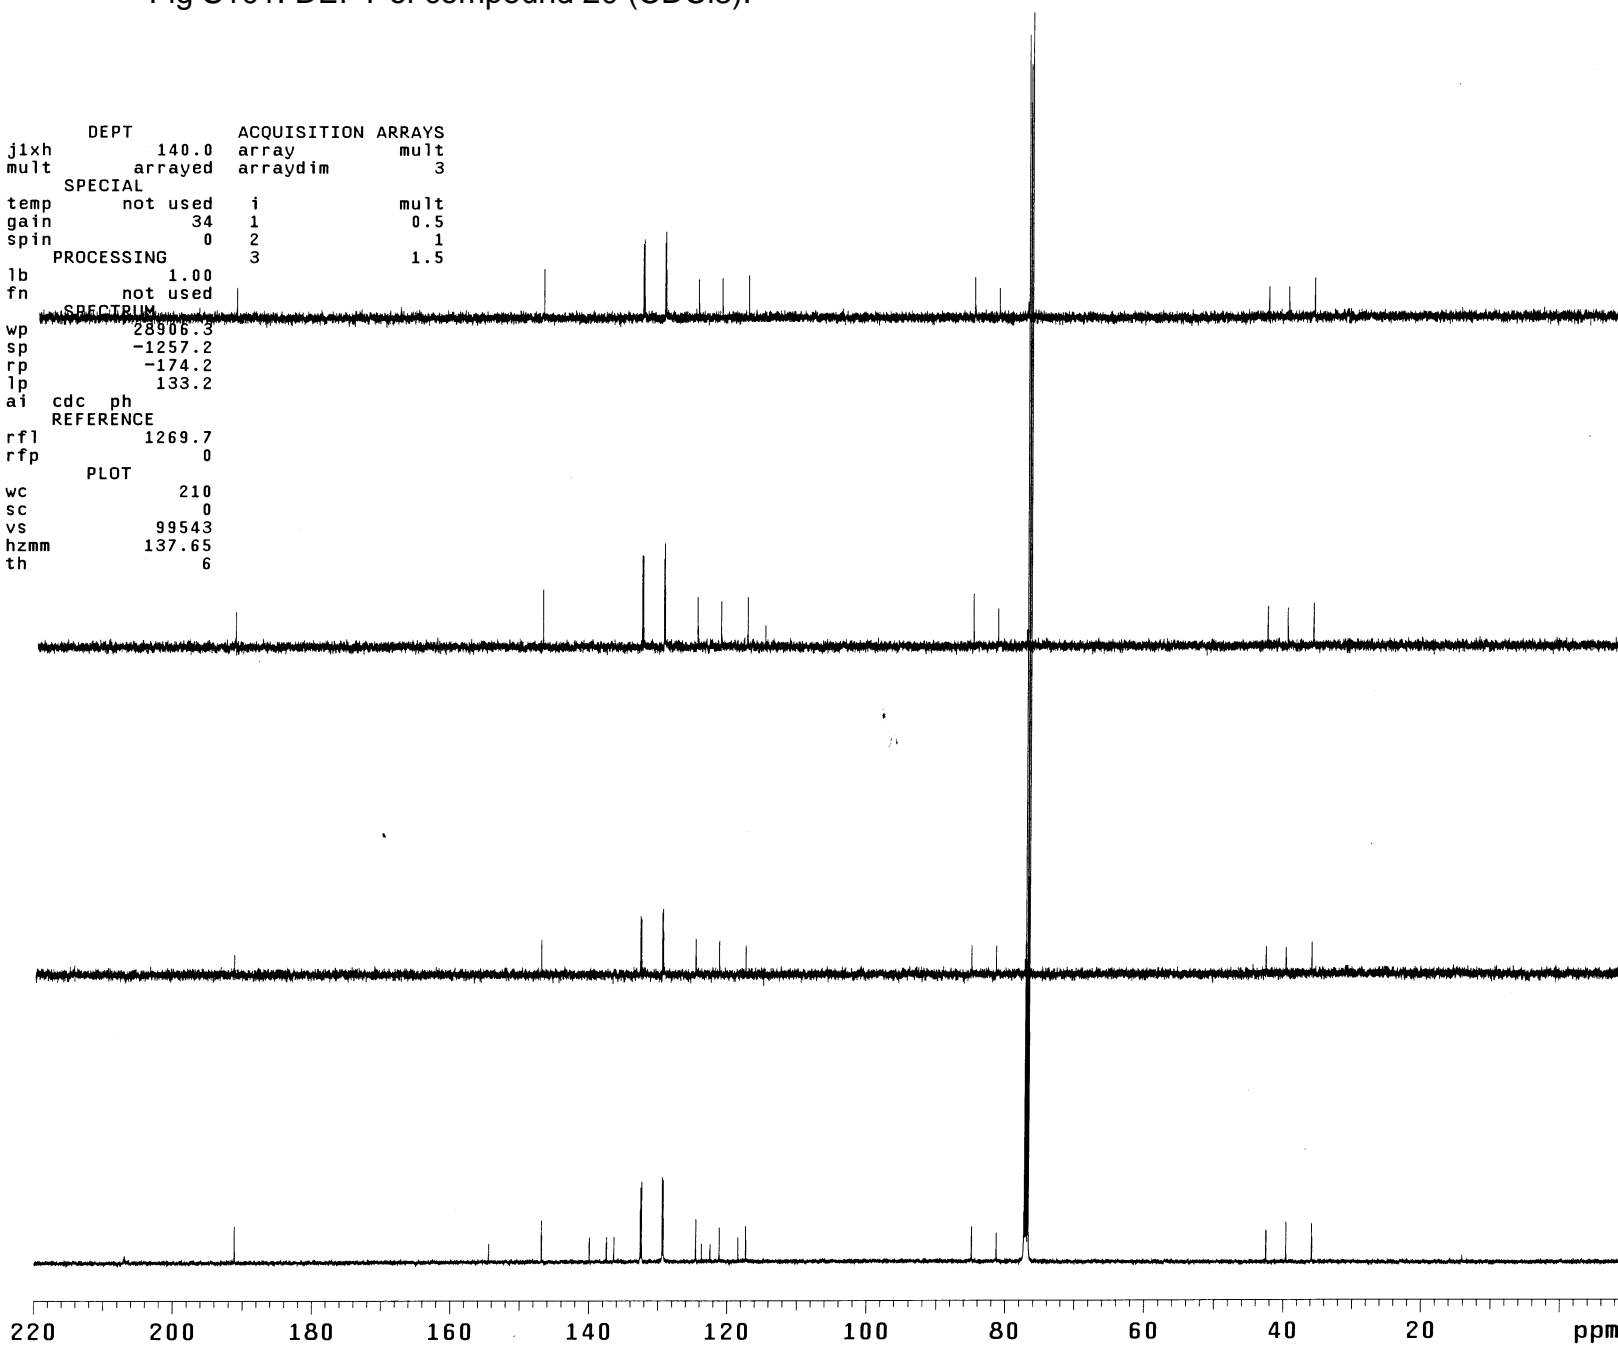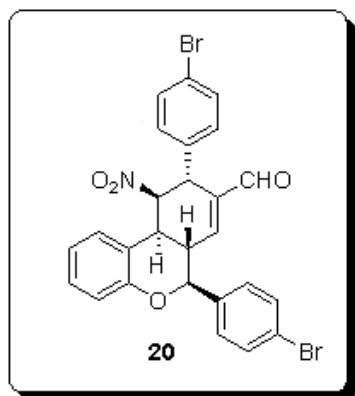

Fig S102. HMQC of compound 20 (CDCl<sub>3</sub>).

S102

pmk-01-72  
exp29 gHMQC

| SAMPLE         |             | FLAGS         | ACQUISITION |          | ARRAYS |
|----------------|-------------|---------------|-------------|----------|--------|
| date           | May 15 2008 | hs            | n           | array    | phase  |
| solvent        | cdcl3       | sspul         | y           | arraydim | 256    |
| sample         | undefined   | PFGflg        | y           |          |        |
| ACQUISITION    |             | hsglv1        | 1006        | i        | phase  |
| sw             | 3501.4      | SPECIAL       | 1           |          | 1      |
| at             | 0.146       | temp          | not used    | 2        | 2      |
| np             | 1024        | gain          | 54          |          |        |
| fb             | not used    | spin          | 0           |          |        |
| ss             | 32          | GRADIENTS     |             |          |        |
| d1             | 1.000       | gzlv11        | 1006        |          |        |
| nt             | 16          | gt1           | 0.001000    |          |        |
| 2D ACQUISITION |             | gzlv13        | 506         |          |        |
| sw1            | 21367.5     | gt3           | 0.001000    |          |        |
| ni             | 128         | gstab         | 0.000500    |          |        |
| phase          | arrayed     | F2 PROCESSING |             |          |        |
| TRANSMITTER    |             | gf            | 0.068       |          |        |
| tn             | H1          | gfs           | not used    |          |        |
| sfrq           | 499.836     | fn            | 1024        |          |        |
| tof            | 749.7       | F1 PROCESSING |             |          |        |
| tpwr           | 57          | gf1           | 0.006       |          |        |
| pw             | 9.600       | gfs1          | not used    |          |        |
| DECOUPLER      |             | proc1         | lp          |          |        |
| dn             | C13         | fn1           | 2048        |          |        |
| dof            | -2515.1     | DISPLAY       |             |          |        |
| dm             | nny         | sp            | 1600.8      |          |        |
| dmm            | ccp         | wp            | 3214.2      |          |        |
| dmf            | 32258       | sp1           | 2686.3      |          |        |
| dpwr           | 33          | wp1           | 16401.2     |          |        |
| pwxlvl         | 49          | rfl           | -1498.3     |          |        |
| pw             | 14.000      | rfp           | 0           |          |        |
| HMQC           |             | rfl1          | 1257.5      |          |        |
| j1xh           | 140.0       | rfp1          | 0           |          |        |
| nullflg        | y           | PLOT          |             |          |        |
|                |             | wc            | 150.0       |          |        |
|                |             | sc            | 6.2         |          |        |
|                |             | wc2           | 116.2       |          |        |
|                |             | sc2           | 0           |          |        |
|                |             | vs            | 1814        |          |        |
|                |             | th            | 5           |          |        |
|                |             | ai            | cdc         | ph       |        |

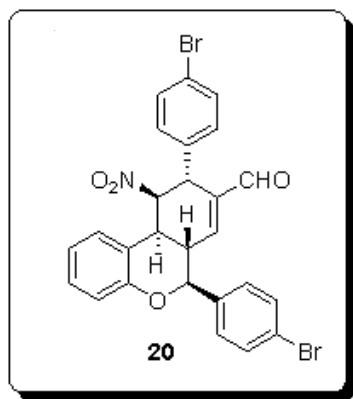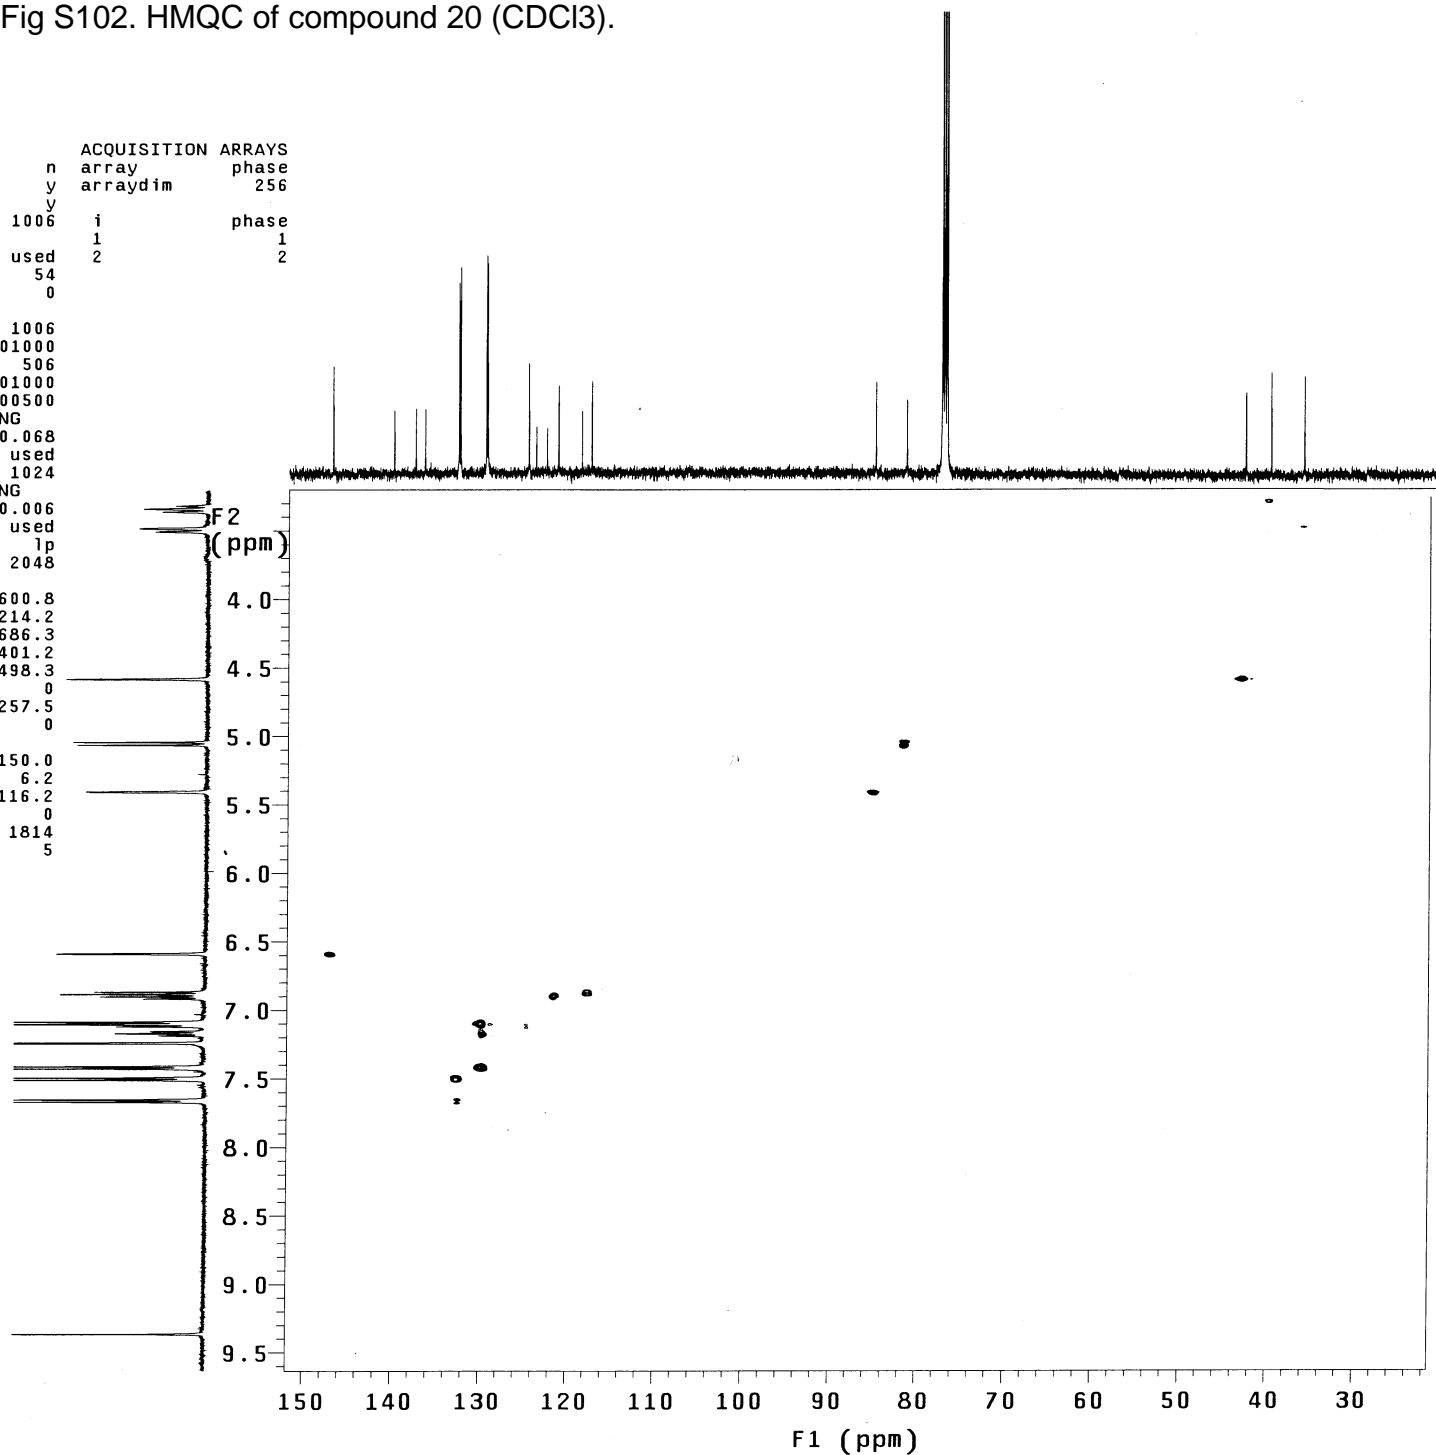

Fig S103. COSY of compound 20 (CDCl3).

S103

pmk-01-72  
exp28 gCOSY

| SAMPLE         |             | FLAGS   |            |
|----------------|-------------|---------|------------|
| date           | May 15 2008 | hs      | nn         |
| solvent        | cdcl3       | sspul   | n          |
| sample         | undefined   | hsglv1  | 1006       |
| ACQUISITION    |             | SPECIAL |            |
| sw             | 3501.4      | temp    | not used   |
| at             | 0.146       | gain    | 34         |
| np             | 1024        | spin    | 0          |
| fb             | not used    | F2      | PROCESSING |
| ss             | 16          | sb      | -0.073     |
| d1             | 1.000       | sbs     | not used   |
| nt             | 16          | fn      | 1024       |
| 2D ACQUISITION |             | F1      | PROCESSING |
| sw1            | 3501.4      | sb1     | -0.037     |
| ni             | 128         | sbs1    | not used   |
| TRANSMITTER    |             | proc1   | lp         |
| tn             | H1          | fn1     | 1024       |
| sfrq           |             | 499.836 | DISPLAY    |
| tof            | 749.7       | sp      | 1566.0     |
| tpwr           | 57          | wp      | 3303.1     |
| pw             | 9.600       | sp1     | 1558.0     |
| GRADIENTS      |             | wp1     | 3303.1     |
| gzlv11         | 1006        | rfl     | 798.4      |
| gt1            | 0.001000    | rfl     | 2289.2     |
| gstab          | 0.000500    | rfl1    | 1799.2     |
| DECOUPLER      |             | rflp1   | 3288.9     |
| dn             | C13         | PLOT    |            |
| dm             | nnn         | wc      | 155.0      |
|                |             | sc      | 10.0       |
|                |             | wc2     | 155.0      |
|                |             | sc2     | 0          |
|                |             | vs      | 1814       |
|                |             | th      | 6          |
|                |             | ai      | cdc av     |

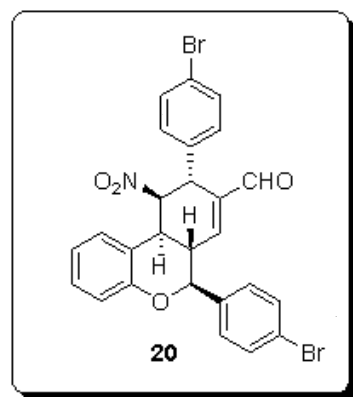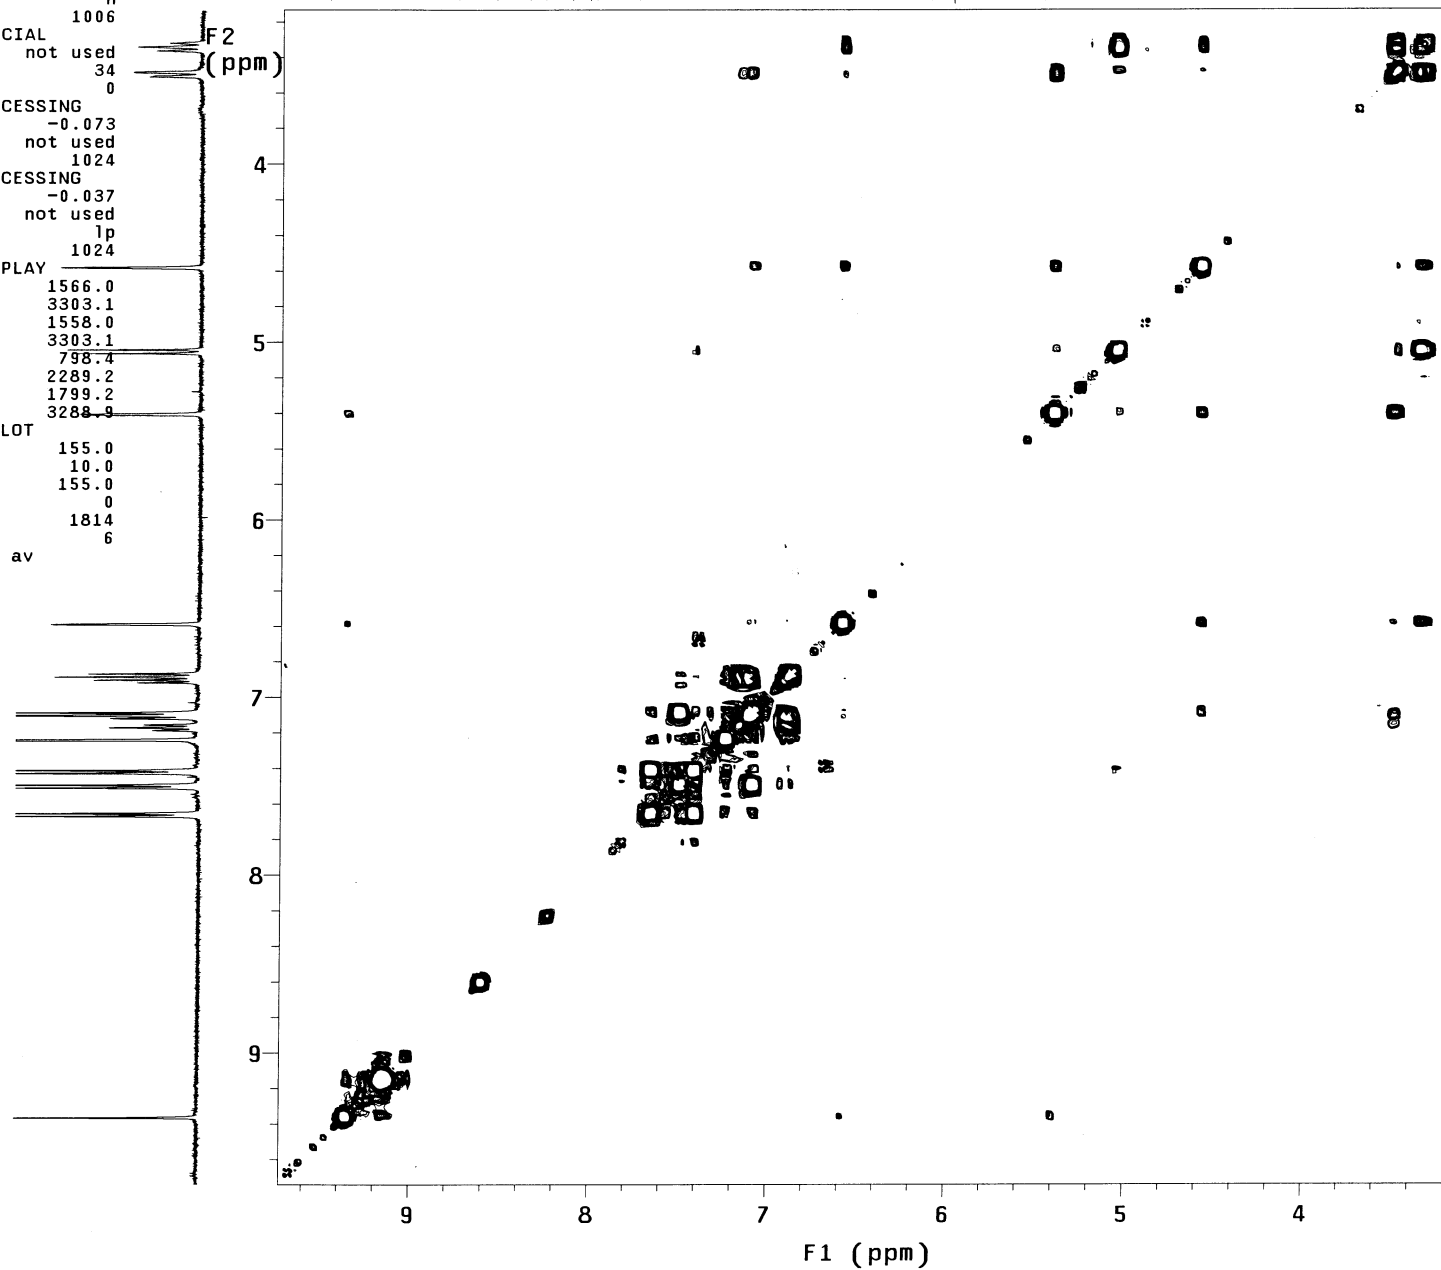

Fig S104. NOESY of compound 20 (CDCl<sub>3</sub>).

S104

pmk-01-72

exp30 NOESY

| SAMPLE         |             | FLAGS         |          |
|----------------|-------------|---------------|----------|
| date           | May 15 2008 | hs            | n        |
| solvent        | cdcl3       | sspul         | y        |
| sample         | undefined   | PFGflg        | y        |
| ACQUISITION    |             | hsglvi        | 1006     |
| sw             | 3501.4      | SPECIAL       |          |
| at             | 0.146       | temp          | not used |
| np             | 1024        | gain          | 34       |
| fb             | not used    | spin          | 0        |
| ss             | 32          | F2 PROCESSING |          |
| d1             | 1.000       | gf            | 0.068    |
| nt             | 8           | gfs           | not used |
| 2D ACQUISITION |             | fn            | 1024     |
| sw1            | 3501.4      | F1 PROCESSING |          |
| ni             | 200         | gf1           | 0.053    |
| TRANSMITTER    |             | gfs1          | not used |
| tn             | H1          | procl         | lp       |
| sfrq           | 499.836     | fn1           | 1024     |
| tof            | 749.7       | DISPLAY       |          |
| tpwr           | 57          | sp            | 1559.8   |
| pw             | 9.600       | wp            | 3275.7   |
| NOESY          |             | sp1           | 1573.5   |
| mix            | 0.600       | wp1           | 3262.0   |
| PRESATURATION  |             | rfl           | -1498.3  |
| satmode        | nnnn        | rfp           | 0        |
| satpwr         | 0           | rfl1          | -1498.3  |
| satlly         | 0           | rfl1          | 0        |
| satfrq         | 0           | PLOT          |          |
| DECOUPLER      |             | wc            | 155.0    |
| dn             | C13         | sc            | 10.0     |
| dm             | nnn         | wc2           | 155.0    |
|                |             | sc2           | 0        |
|                |             | vs            | 1814     |
|                |             | th            | 1        |
|                |             | ai            | ph       |

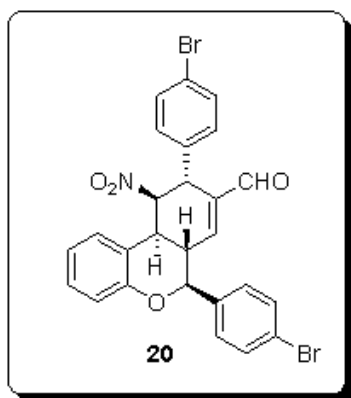F2  
(ppm)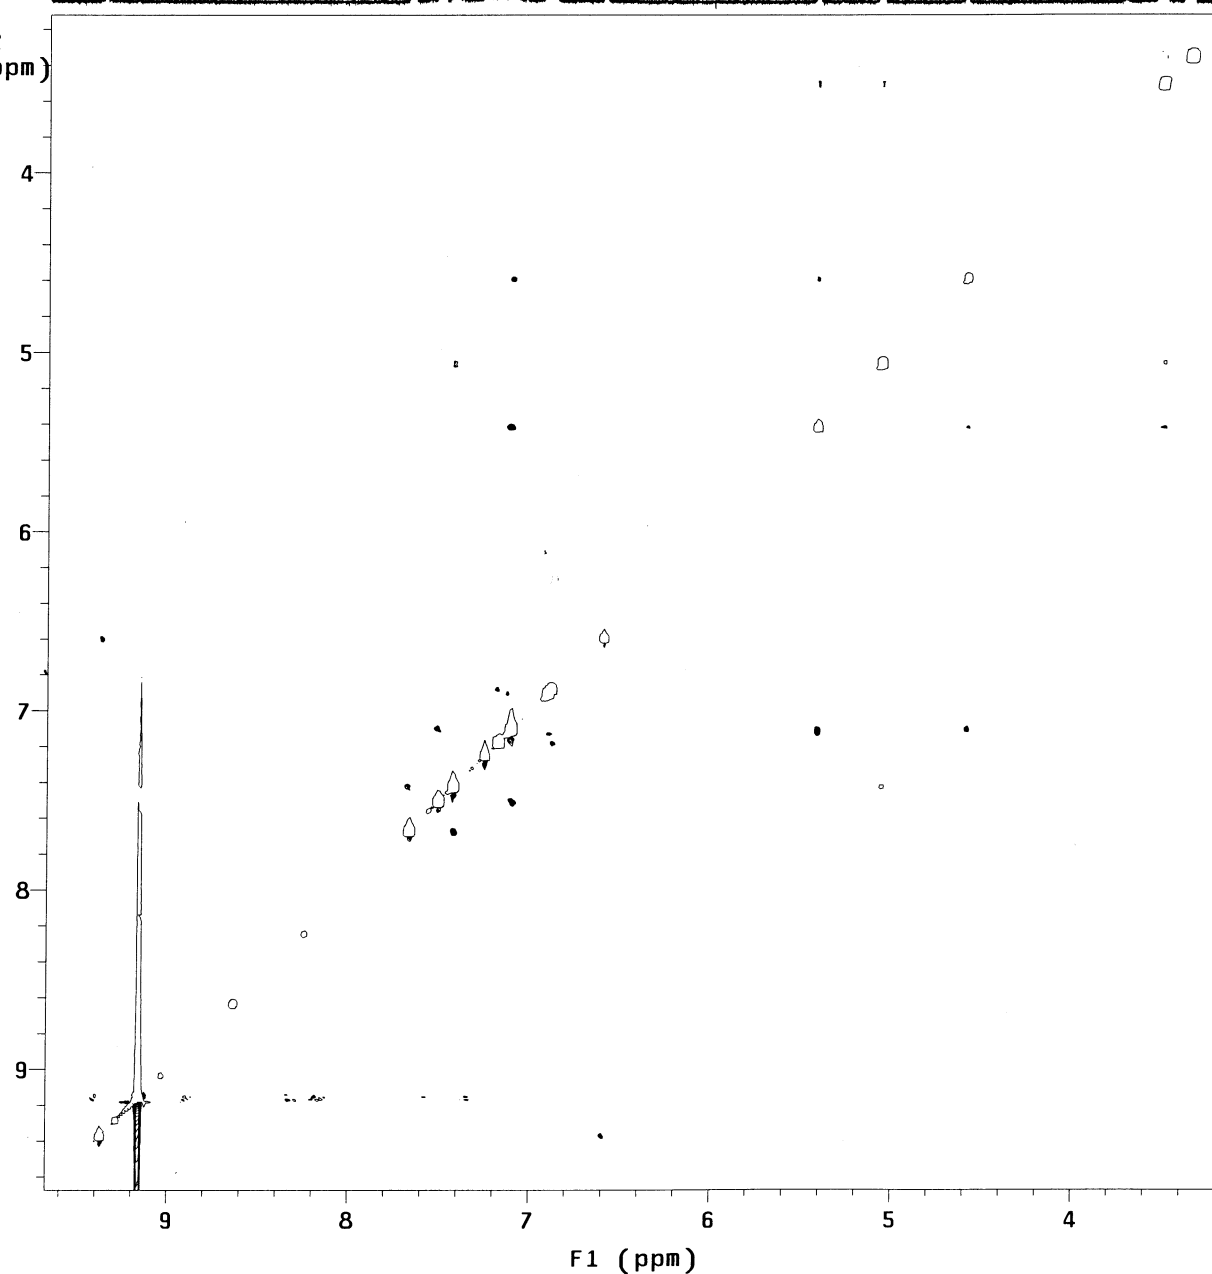

Fig S105. <sup>1</sup>H NMR of compound 21 (500 MHz, CDCl<sub>3</sub>).

S105

PMK-01-166

exp11 s2pu1

|             |             |            |          |
|-------------|-------------|------------|----------|
| SAMPLE      |             | DEC. & VT  |          |
| date        | Dec 11 2008 | dfrq       | 125.695  |
| solvent     | cdcl3       | dn         | C13      |
| file        | exp         | dpwr       | 30       |
| ACQUISITION |             | dof        | 0        |
| sfrq        | 499.836     | dm         | nnn      |
| tn          | H1          | dmm        | c        |
| at          | 3.000       | dmf        | 200      |
| np          | 48000       | dseq       |          |
| sw          | 8000.0      | dres       | 1.0      |
| fb          | 4000        | homo       | n        |
| bs          |             | PROCESSING |          |
| tpwr        | 57          | wtfile     |          |
| pw          | 4.8         | proc       | ft       |
| d1          | 1.000       | fn         | not used |
| tof         | 499.7       | math       | f        |
| nt          | 4           |            |          |
| ct          | 4           | werr       | react    |
| alock       | y           | wexp       | procplot |
| gain        | not used    | wbs        |          |
| FLAGS       |             | wnt        | wft      |
| il          | n           |            |          |
| in          | n           |            |          |
| dp          | y           |            |          |
| hs          | nn          |            |          |
| DISPLAY     |             |            |          |
| sp          | -250.1      |            |          |
| wp          | 5498.0      |            |          |
| vs          | 57          |            |          |
| sc          | 0           |            |          |
| wc          | 210         |            |          |
| hzmm        | 26.18       |            |          |
| is          | 83.74       |            |          |
| rfl         | 4628.4      |            |          |
| rfp         | 3618.8      |            |          |
| th          | 3           |            |          |
| ins         | 100.000     |            |          |
| nm          | ph          |            |          |

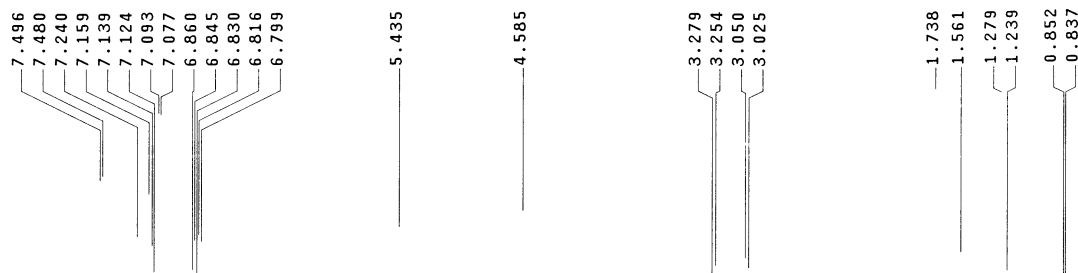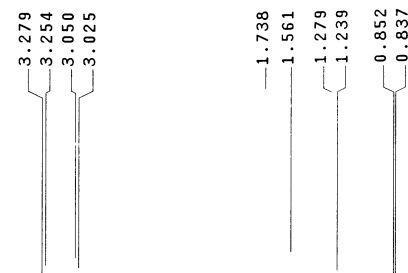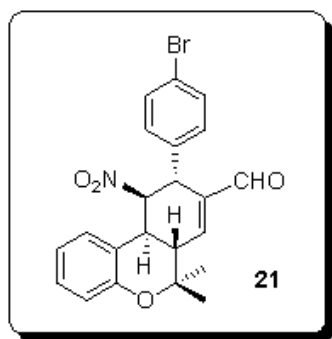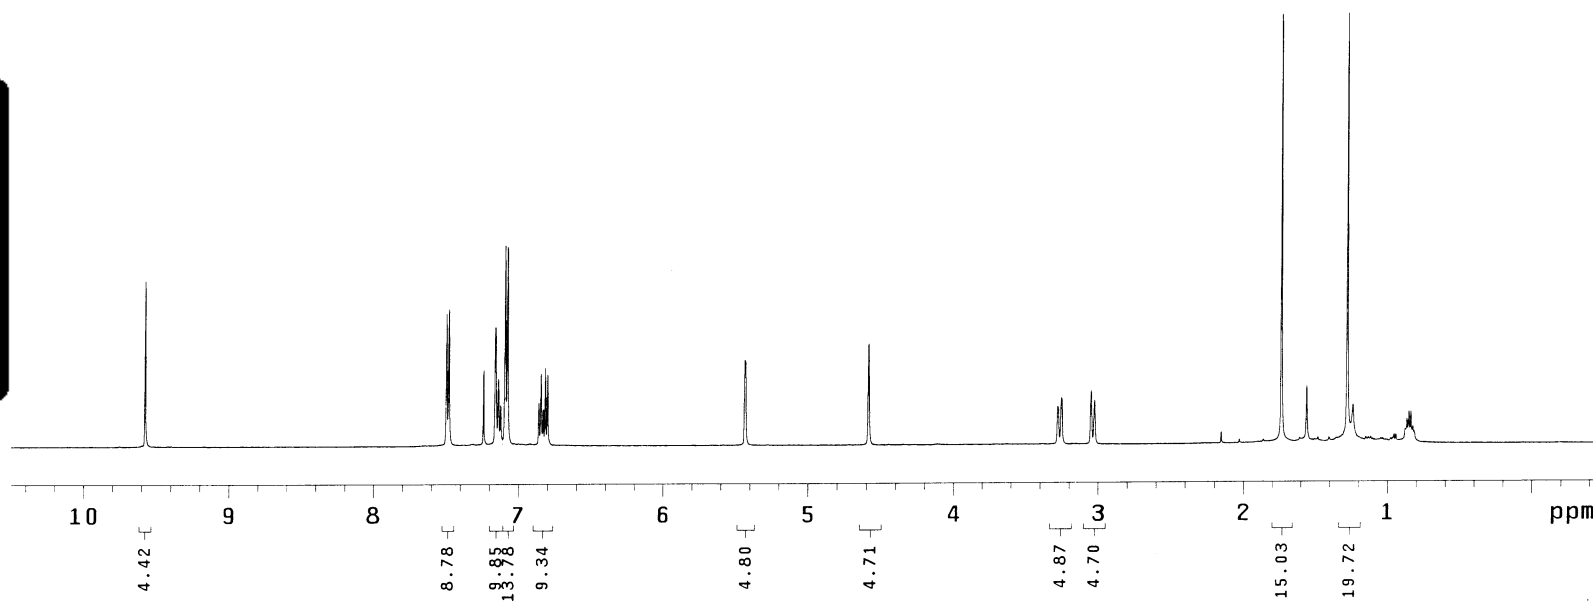

Fig S106. <sup>13</sup>C NMR of compound 21 (125 MHz, CDCl<sub>3</sub>).

S106

PMK-01-166

exp12 s2pul

|             |             |            |          |
|-------------|-------------|------------|----------|
| SAMPLE      |             | DEC. & VT  |          |
| date        | Dec 11 2008 | dfrq       | 499.836  |
| solvent     | cdcl3       | dn         | H1       |
| file        | exp         | dpwr       | 39       |
| ACQUISITION |             | dof        | 0        |
| sfrq        | 125.698     | dm         | VVY      |
| tn          | C13         | dmm        | w        |
| at          | 1.000       | dmf        | 11905    |
| np          | 62894       | dseq       |          |
| sw          | 31446.5     | dres       | 1.0      |
| fb          | 17000       | homo       | n        |
| bs          | 16          | PROCESSING |          |
| ss          | 2           | lb         | 1.00     |
| tpwr        | 54          | wtfile     |          |
| pw          | 4.0         | proc       | ft       |
| d1          | 1.000       | fn         | not used |
| tof         | 2512.2      | math       | f        |
| nt          | 10000       |            |          |
| ct          | 6496        | werr       | react    |
| alock       | y           | wexp       | procplot |
| gain        | not used    | wbs        | testsn   |
| FLAGS       |             | wnt        |          |
| il          | n           |            |          |
| in          | n           |            |          |
| dp          | y           |            |          |
| hs          | nn          |            |          |
| DISPLAY     |             |            |          |
| sp          | -1257.2     |            |          |
| wp          | 27650.1     |            |          |
| vs          | 112         |            |          |
| sc          | 0           |            |          |
| wc          | 210         |            |          |
| hzmm        | 131.67      |            |          |
| is          | 500.00      |            |          |
| rfl         | 1269.7      |            |          |
| rfp         | 0           |            |          |
| th          | 6           |            |          |
| ins         | 100.000     |            |          |
| nm          | ph          |            |          |

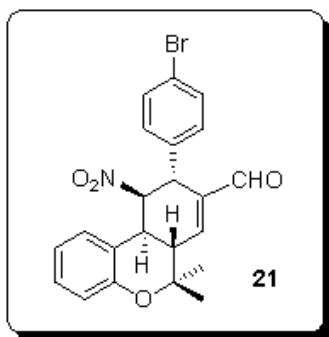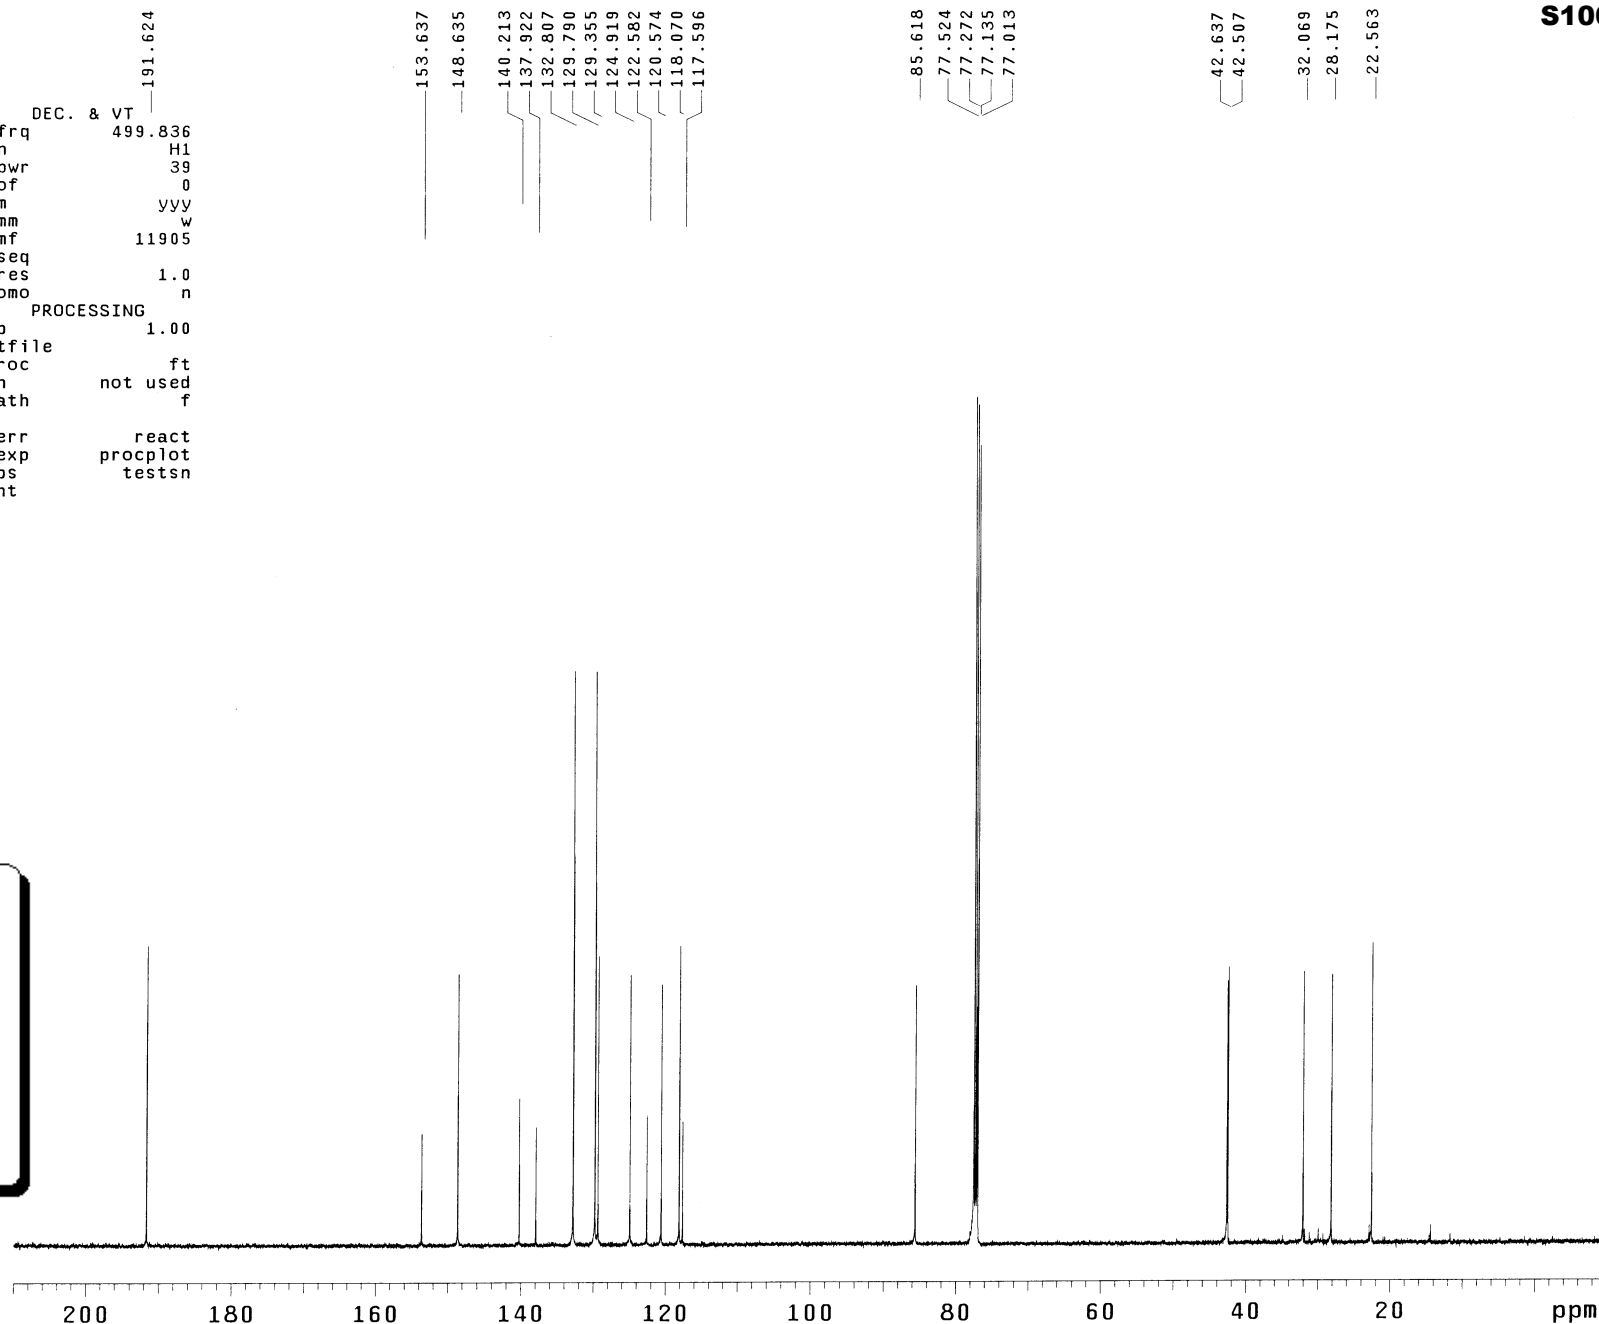

Fig S107. DEPT of compound 21 (CDCl<sub>3</sub>).

S107

PMK-01-166

exp13 DEPT

| SAMPLE      |             | DEPT       | ACQUISITION ARRAYS |          |
|-------------|-------------|------------|--------------------|----------|
| date        | Dec 11 2008 | j1xh       | 140.0              | mult     |
| solvent     | cdcl3       | mult       | arrayed            | arraydim |
| sample      | undefined   | SPECIAL    | not used           | mult     |
| ACQUISITION |             | temp       | not used           | mult     |
| sw          | 31446.5     | gain       | 20                 | 1        |
| at          | 1.000       | spin       | 0                  | 2        |
| np          | 62894       | PROCESSING | 3                  | 1.5      |
| bs          | 16          | lb         | 1.00               |          |
| ss          | -4          | fn         | not used           |          |
| d1          | 1.000       | SPECTRUM   |                    |          |
| nt          | 1000        | wp         | 27650.1            |          |
| ct          | 1000        | sp         | -1257.2            |          |
| TRANSMITTER |             | rp         | 15.2               |          |
| tn          | C13         | lp         | 87.9               |          |
| tof         | 2512.2      | ai         | cdc ph             |          |
| tpwr        | 54          | REFERENCE  |                    |          |
| pw          | 9.400       | rfl        | 1269.7             |          |
| DECOUPLER   |             | rflp       | 0                  |          |
| dn          | H1          | PLOT       |                    |          |
| dof         | 0           | wc         | 210                |          |
| dpwr        | 39          | sc         | 0                  |          |
| dm          | nnv         | vs         | 186                |          |
| dmm         | ccw         | hzmm       | 131.67             |          |
| dmf         | 11905       | th         | 68                 |          |
| pplv1       | 49          |            |                    |          |
| pp          | 29.400      |            |                    |          |

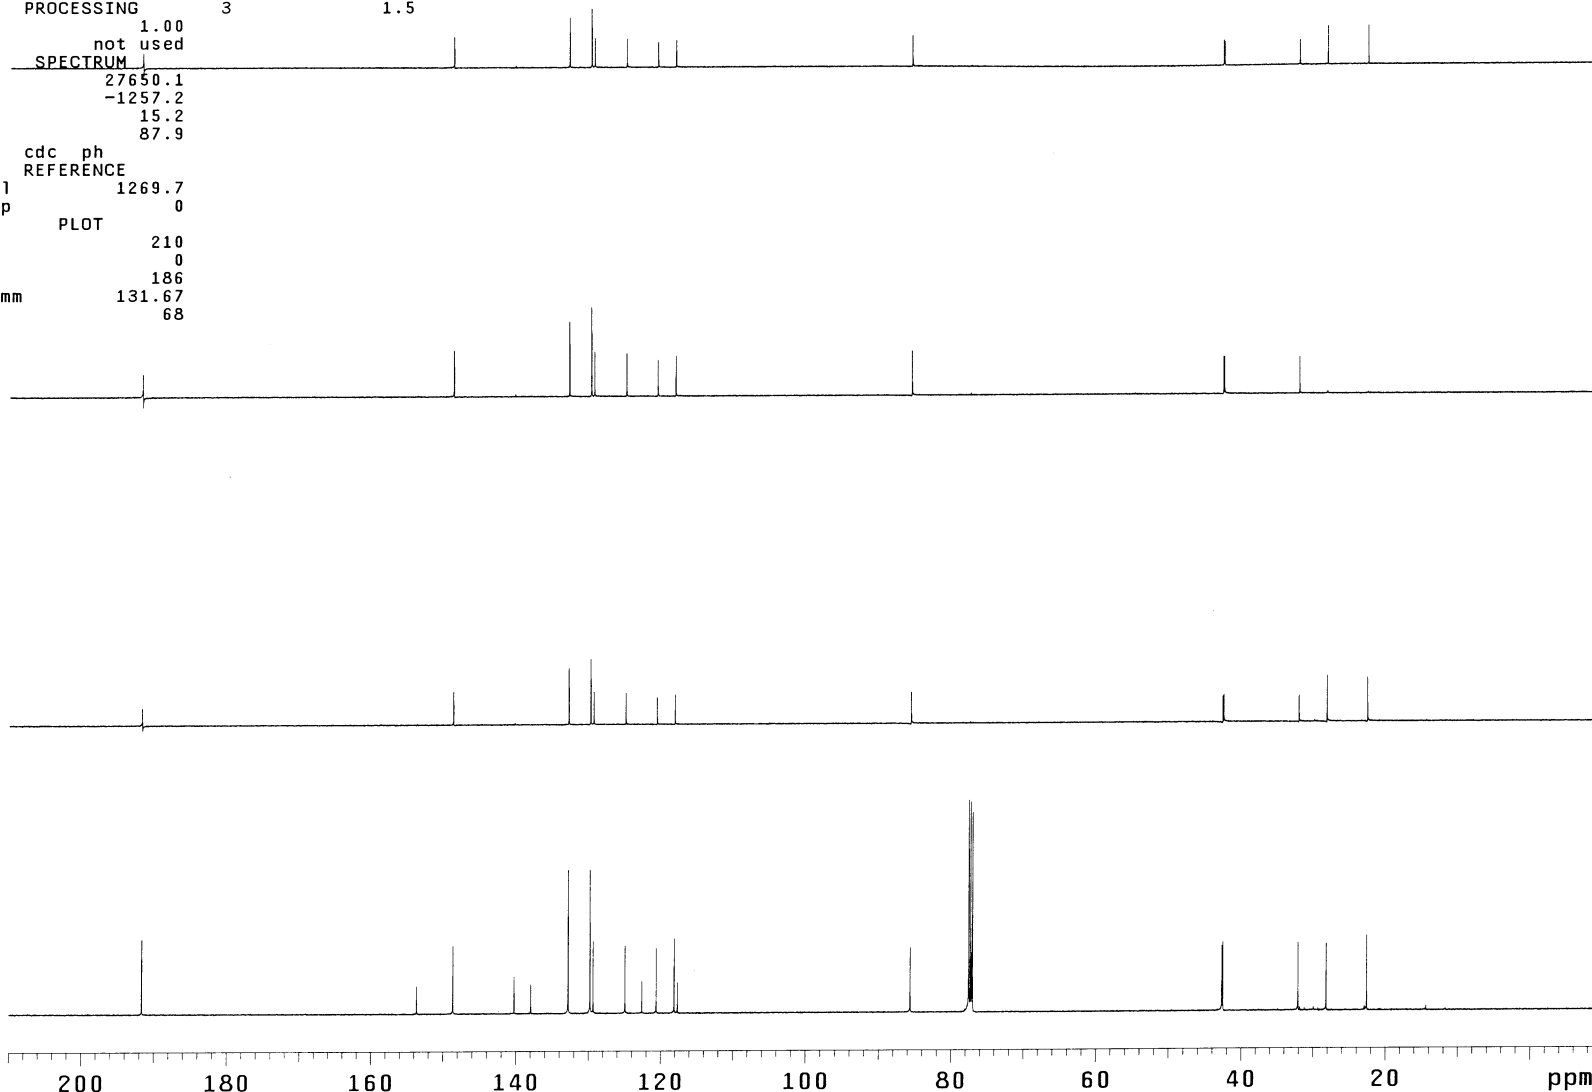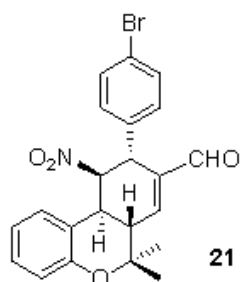

21

Fig S108. HMQC of compound 21 (CDCl<sub>3</sub>).

S108

## STANDARD PROTON PARAMETERS

exp15 gHMQC

| SAMPLE         |             | FLAGS         | ACQUISITION | ARRAYS |
|----------------|-------------|---------------|-------------|--------|
| date           | Dec 11 2008 | hs            | n           | phase  |
| solvent        | cdcl3       | sspul         | y           | 256    |
| sample         | undefined   | PFGflg        | y           |        |
| ACQUISITION    |             | hsglv1        | 1026        | phase  |
| sw             | 4498.4      | SPECIAL       | 1           | 1      |
| at             | 0.228       | temp          | not used    | 2      |
| np             | 2048        | gain          | 30          |        |
| fb             | 3000        | spin          | 0           |        |
| ss             | 32          | GRADIENTS     |             |        |
| d1             | 1.000       | gzlv11        | 1026        |        |
| nt             | 16          | gt1           | 0.001000    |        |
| 2D ACQUISITION |             | gzlv13        | 516         |        |
| sw1            | 21367.5     | gt3           | 0.001000    |        |
| ni             | 128         | gstab         | 0.000500    |        |
| phase          | arrayed     | F2 PROCESSING |             |        |
| TRANSMITTER    |             | gf            | 0.105       |        |
| tn             | H1          | gfs           | not used    |        |
| sfrq           | 499.836     | fn            | 2048        |        |
| tof            | 249.8       | F1 PROCESSING |             |        |
| tpwr           | 57          | gf1           | 0.006       |        |
| pw             | 13.000      | gfs1          | not used    |        |
| DECOUPLER      |             | proc1         | lp          |        |
| dn             | C13         | fn1           | 2048        |        |
| dof            | -2515.1     | DISPLAY       |             |        |
| dm             | nny         | sp            | 515.8       |        |
| dmm            | ccp         | wp            | 3571.5      |        |
| dmf            | 32258       | sp1           | 2374.8      |        |
| dpwr           | 35          | wp1           | 16860.3     |        |
| pxlv1          | 51          | rfl           | 2227.2      |        |
| pxw            | 14.700      | rfp           | 2716.6      |        |
| HMQC           |             | rfl1          | 12016.8     |        |
| j1xh           | 140.0       | rfp1          | 10760.7     |        |
| nullflg        | y           | PLOT          |             |        |
|                |             | wc            | 150.0       |        |
|                |             | sc            | 6.2         |        |
|                |             | wc2           | 116.2       |        |
|                |             | sc2           | 0           |        |
|                |             | vs            | 57          |        |
|                |             | th            | 4           |        |
|                |             | ai            | cdc         | ph     |

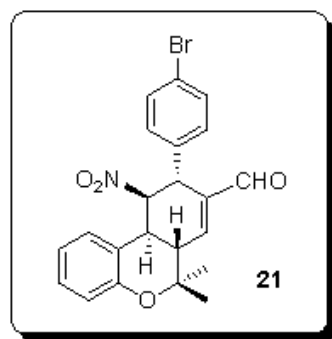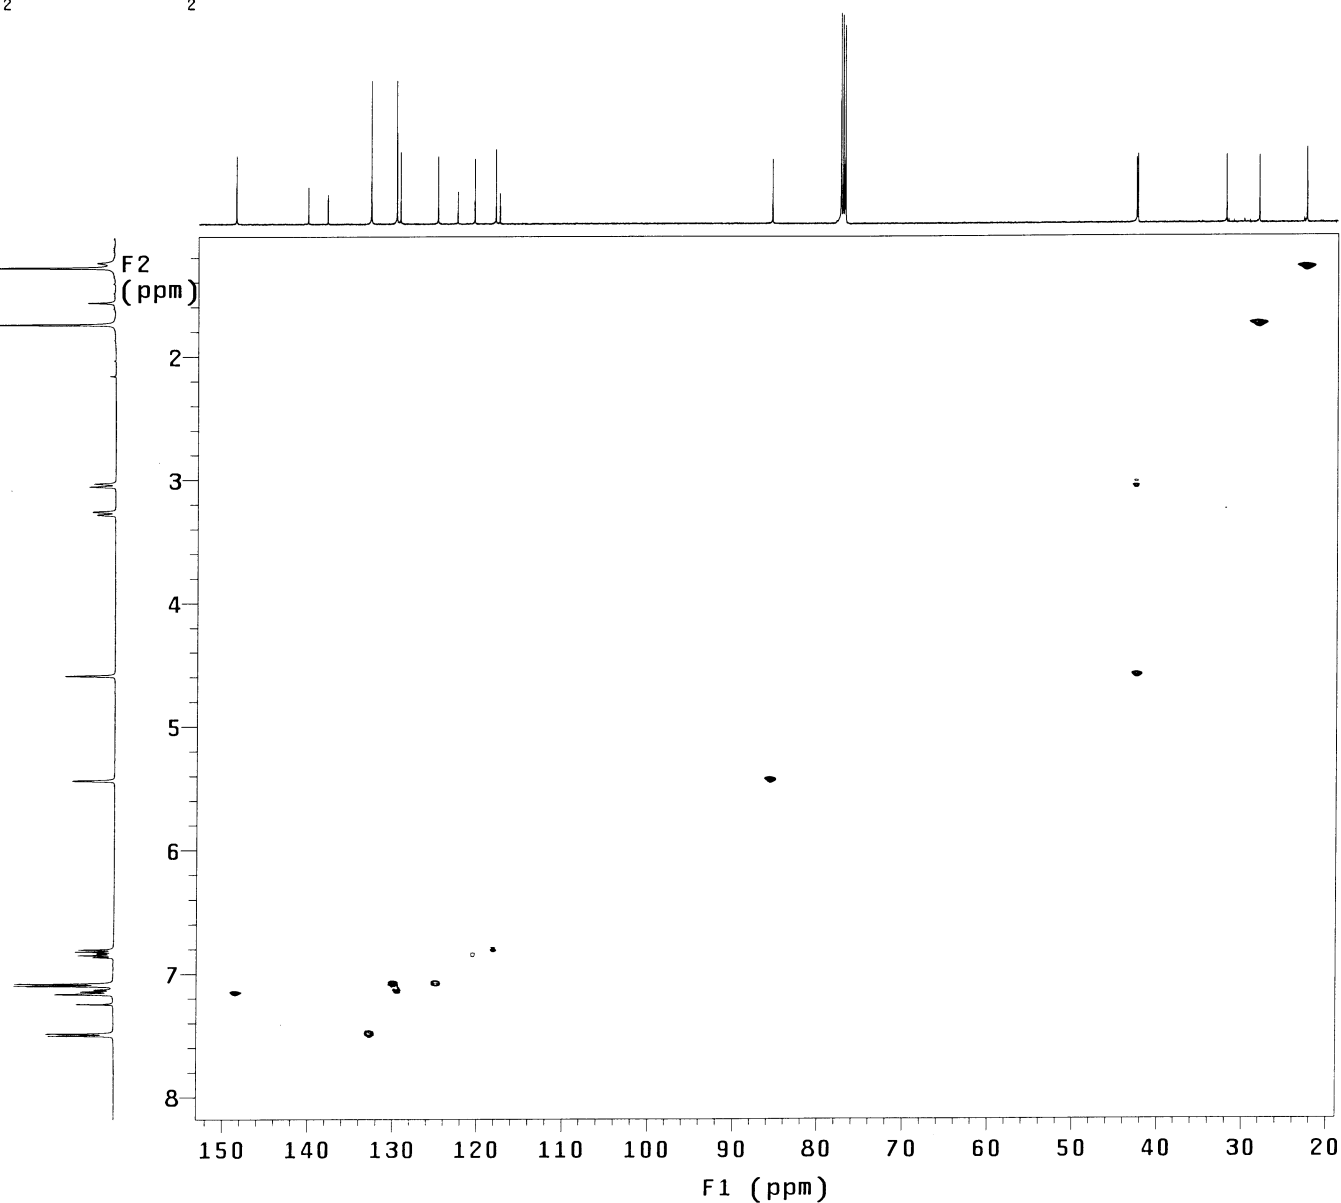

Fig S109. COSY of compound 21 (CDCl<sub>3</sub>).

S109

PMK-01-166

exp14 gCOSY

|                |             |               |          |
|----------------|-------------|---------------|----------|
| SAMPLE         |             | FLAGS         |          |
| date           | Dec 11 2008 | hs            | nn       |
| solvent        | cdcl3       | sspul         | n        |
| sample         | undefined   | hsglv1        | 1026     |
| ACQUISITION    |             | SPECIAL       |          |
| sw             | 4498.4      | temp          | not used |
| at             | 0.228       | gain          | 30       |
| np             | 2048        | spin          | 0        |
| fb             | 3000        | F2 PROCESSING |          |
| ss             | 16          | sb            | -0.114   |
| d1             | 1.000       | sbs           | not used |
| nt             | 16          | fn            | 2048     |
| 2D ACQUISITION |             | F1 PROCESSING |          |
| sw1            | 4498.4      | sb1           | -0.028   |
| ni             | 128         | sbs1          | not used |
| TRANSMITTER    |             | proc1         |          |
| tn             | H1          | fn1           | 2048     |
| sfrq           | 499.836     | DISPLAY       |          |
| tof            | 249.8       | sp            | 493.2    |
| tpwr           | 57          | wp            | 4494.0   |
| pw             | 13.000      | sp1           | 504.2    |
| GRADIENTS      |             | wp1           | 4494.0   |
| gzlv11         | 1026        | rfl           | 2227.8   |
| gt1            | 0.001000    | rfp           | 2716.6   |
| gstab          | 0.000500    | rfl1          | -499.8   |
| DECOUPLER      |             | rfp1          | 0        |
| dn             | C13         | PLOT          |          |
| dm             | nnn         | wc            | 155.0    |
|                |             | sc            | 10.0     |
|                |             | wc2           | 155.0    |
|                |             | sc2           | 0        |
|                |             | vs            | 57       |
|                |             | th            | 4        |
|                |             | ai            | cdc av   |

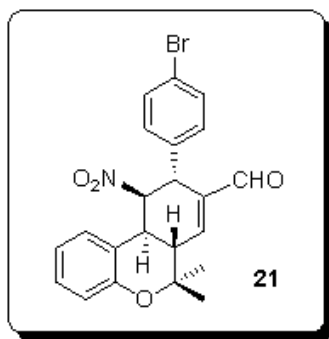

F2  
(ppm)

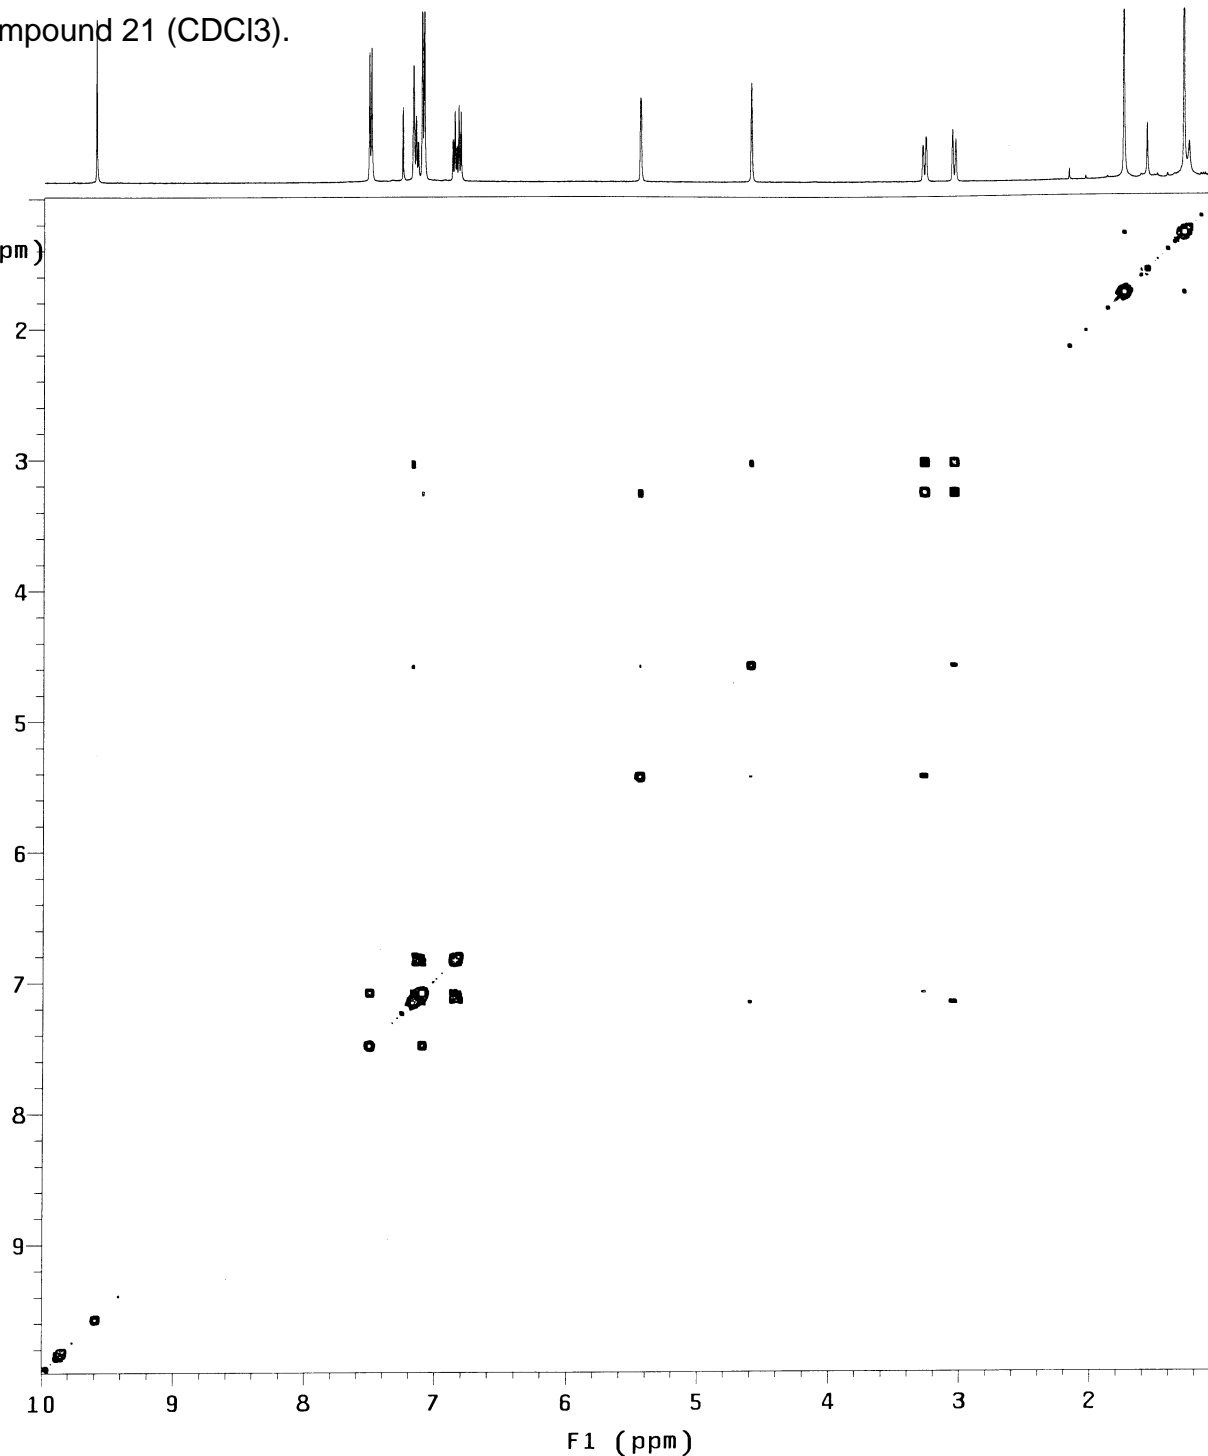

Fig S110. NOESY of compound 21 (CDCl<sub>3</sub>).

S110

## STANDARD PROTON PARAMETERS

exp16 NOESY

| SAMPLE         |             | FLAGS         |          |
|----------------|-------------|---------------|----------|
| date           | Dec 11 2008 | hs            | n        |
| solvent        | cdcl3       | sspul         | y        |
| sample         | undefined   | PFGflg        | y        |
| ACQUISITION    |             | hsglv1        | 1026     |
| sw             | 4498.4      | SPECIAL       |          |
| at             | 0.228       | temp          | not used |
| np             | 2048        | gain          | 30       |
| fb             | 3000        | spin          | 0        |
| ss             | 32          | F2 PROCESSING |          |
| d1             | 1.000       | gf            | 0.105    |
| nt             | 8           | gfs           | not used |
| 2D ACQUISITION |             | fn            | 2048     |
| sw1            | 4498.4      | F1 PROCESSING |          |
| ni             | 200         | gf1           | 0.041    |
| TRANSMITTER    |             | gfs1          | not used |
| tn             | H1          | proc1         | 1p       |
| sfrq           | 499.836     | fn1           | 2048     |
| tof            | 249.8       | DISPLAY       |          |
| tpwr           | 57          | sp            | 493.7    |
| pw             | 13.000      | wp            | 4494.0   |
| NOESY          |             | sp1           | 496.9    |
| mix            | 0.200       | wp1           | 4494.0   |
| PRESATURATION  |             | rfl           | 2227.2   |
| satmode        | nnnn        | rfp           | 2716.6   |
| satpwr         | 0           | rfl1          | 2224.1   |
| satdly         | 0           | rfp1          | 2716.6   |
| satfrq         | 0           | PLOT          |          |
| DECOUPLER      |             | wc            | 155.0    |
| dn             | C13         | sc            | 10.0     |
| dm             | nnn         | wc2           | 155.0    |
|                |             | sc2           | 0        |
|                |             | vs            | 1814     |
|                |             | th            | 2        |
|                |             | ai            | ph       |

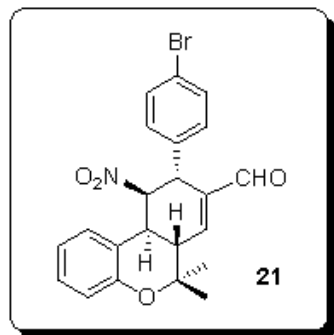F2  
(ppm)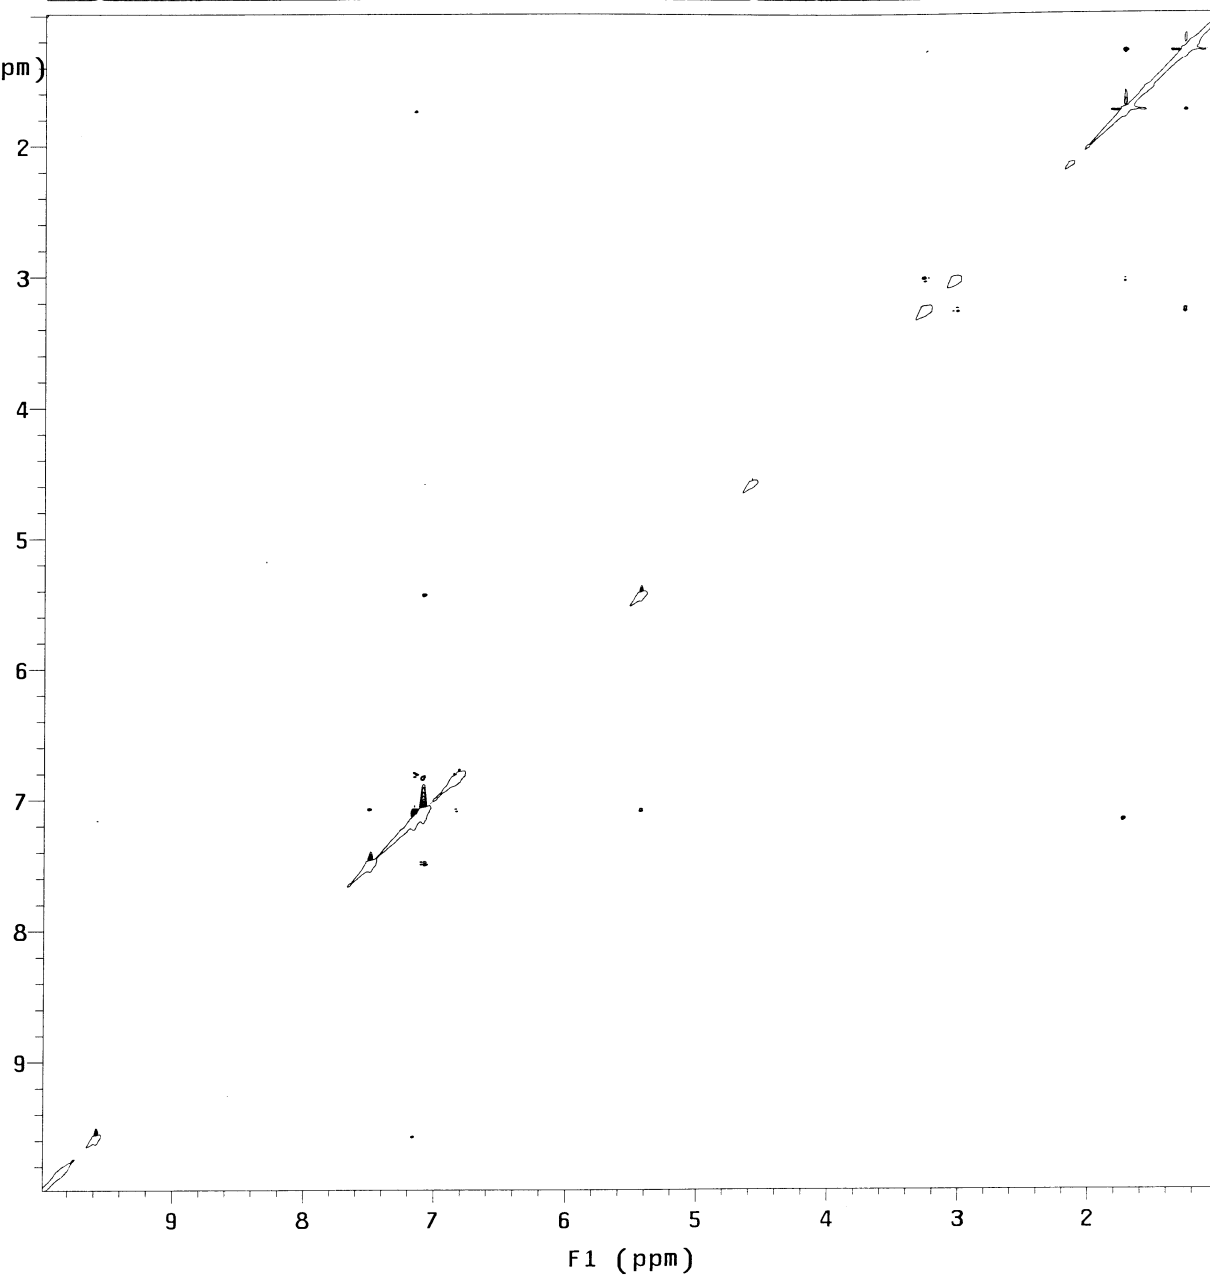

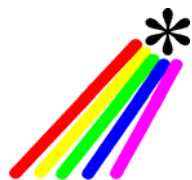

## Peak Report

pmk-01-203-racemate-colmn-1A-20%ipa-hexane

Report produced on 2009/11/7 at 下午 04:18:24 by Put your name here

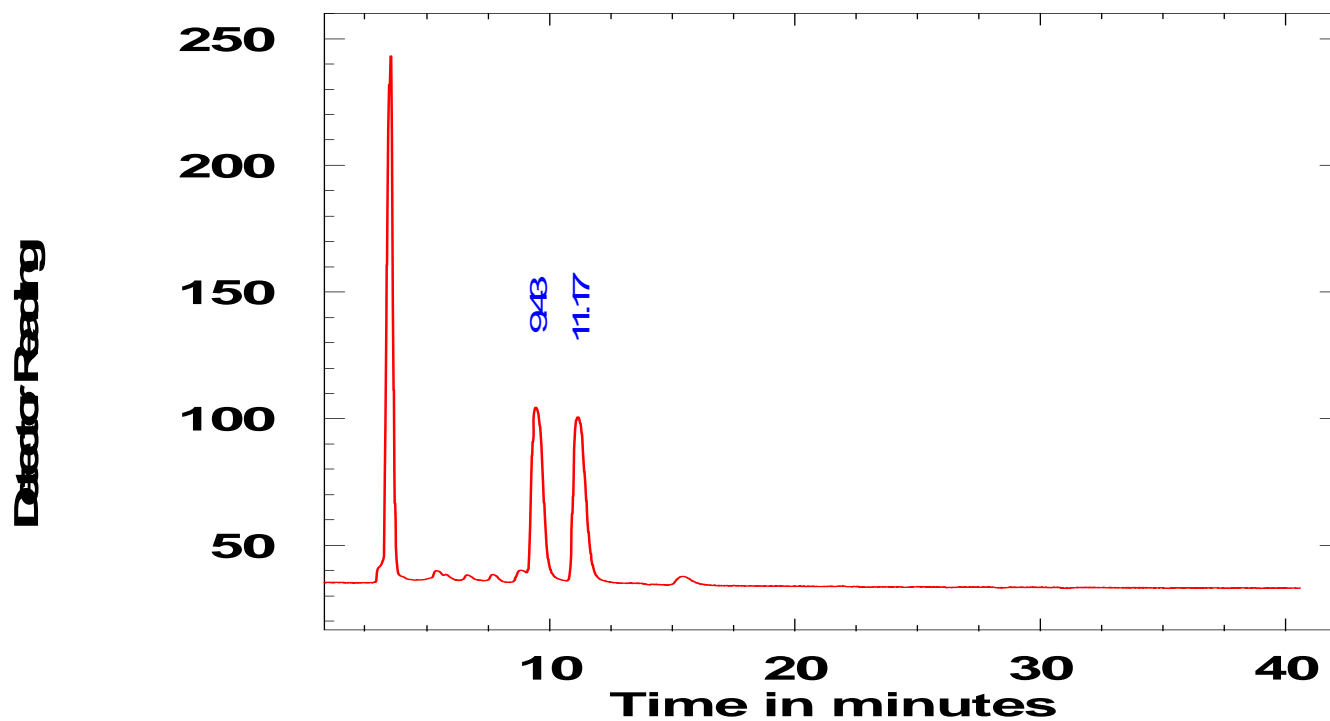

| Peak # | Begin | End   | Peak Area | Maximum | Time  | Area % | Begins as |
|--------|-------|-------|-----------|---------|-------|--------|-----------|
| 1      | 9.11  | 10.12 | 1992      | 104.50  | 9.43  | 49.4   | Baseline  |
| 2      | 10.76 | 11.83 | 2041      | 100.67  | 11.17 | 50.6   | Baseline  |

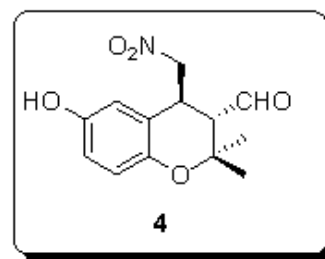

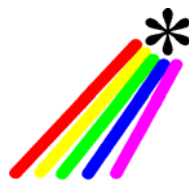

# Chromatogram Report

First line of organization's address

Second line of organization's address

pmk-01-203-chiral-column-IA-20%ipa-hexane

Report produced on 2009/11/30 at 下午 03:26:00 by Put your name here

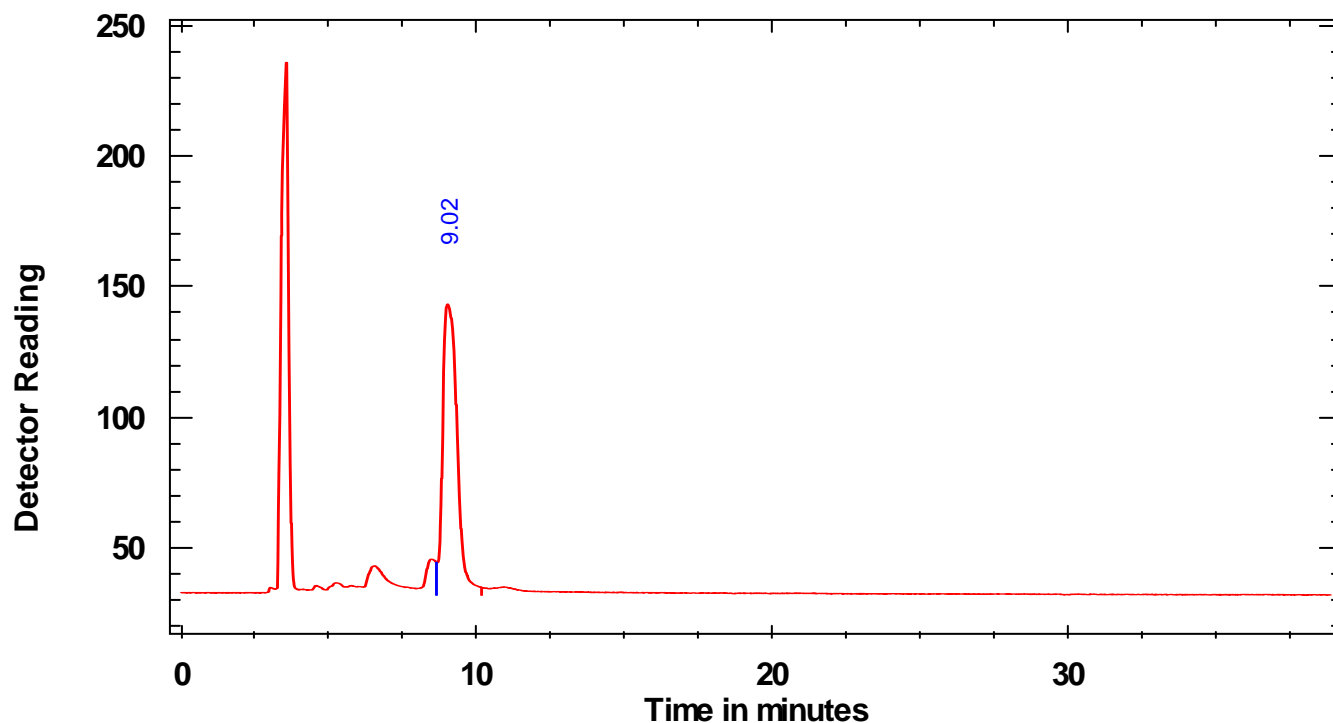

2009/11/7 02:23:03 Flow set to 1.00 at 0.00 minutes

2009/11/7 03:02:01 Run stopped by operator

## PEAK REPORT

| # | begin | end   | area | percent | maximum | time | begins as | name |
|---|-------|-------|------|---------|---------|------|-----------|------|
| 1 | 8.65  | 10.17 | 3094 | 100.0   | 142.84  | 9.02 | Baseline  |      |

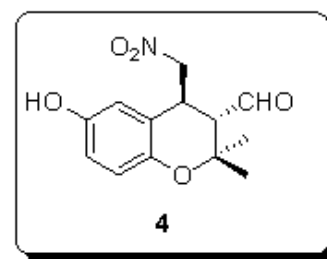



## Peak Report

pmk-01-203-chiral+racemate-column-1A-20%ipa-hexane

Report produced on 2009/11/7 at 下午 04:25:30 by Put your name here

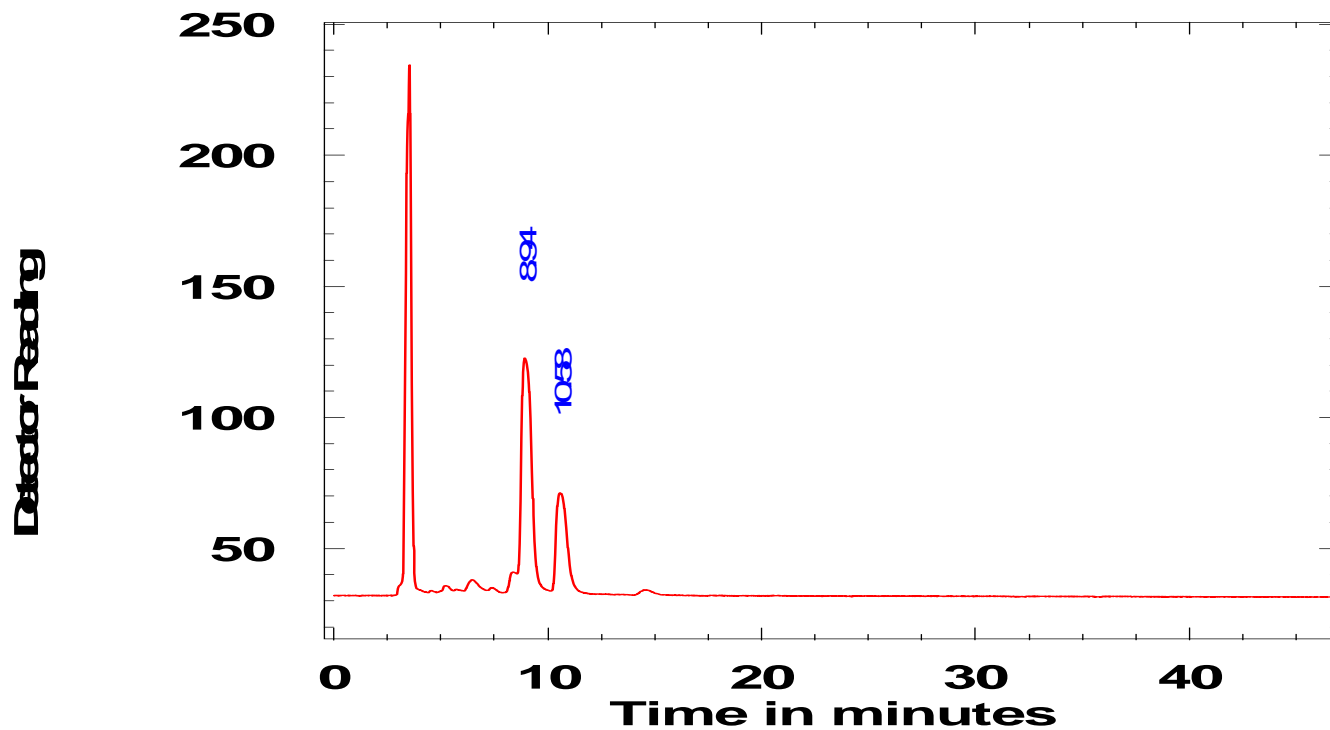

| Peak # | Begin | End   | Peak Area | Maximum | Time  | Area % | Begins as |
|--------|-------|-------|-----------|---------|-------|--------|-----------|
| 1      | 8.43  | 9.66  | 2604      | 122.63  | 8.94  | 67.8   | Baseline  |
| 2      | 10.06 | 11.35 | 1235      | 71.20   | 10.58 | 32.2   | Baseline  |

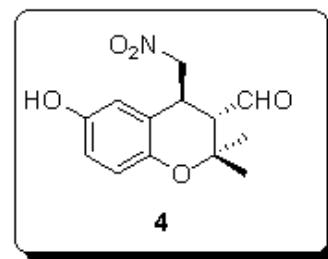



# Peak Report

PMK-01-204

Report produced on 2009/9/30 at 下午 06:32:00 by Put your name here

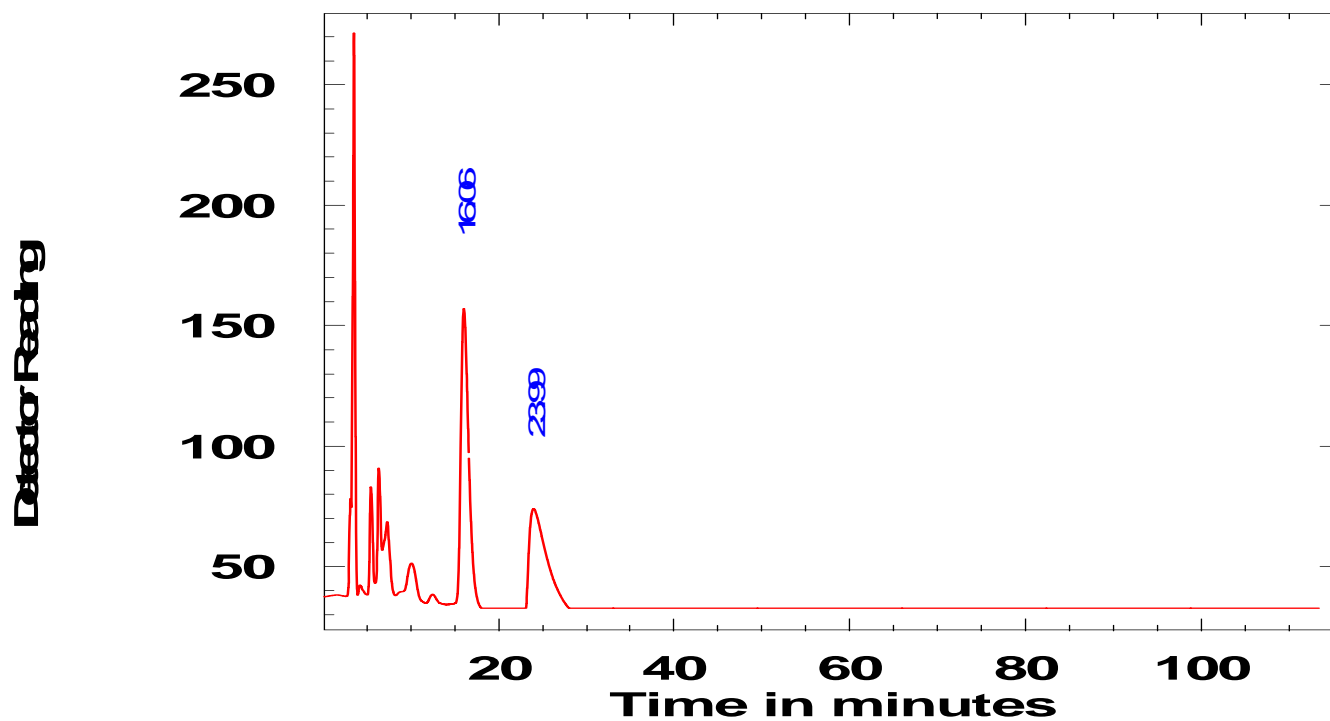

| Peak # | Begin | End   | Peak Area | Maximum | Time  | Area % | Begins as |
|--------|-------|-------|-----------|---------|-------|--------|-----------|
| 1      | 15.04 | 17.34 | 6883      | 157.01  | 16.06 | 48.9   | Baseline  |
| 2      | 22.46 | 31.70 | 7204      | 73.93   | 23.99 | 51.1   | Baseline  |

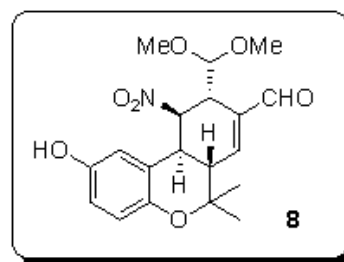



# Chromatogram Report

PMK-01-204-Chiral -20%ipa/hex/colm-od

Report produced on 2009/11/30 at 下午 03:40:39 by Put your name here

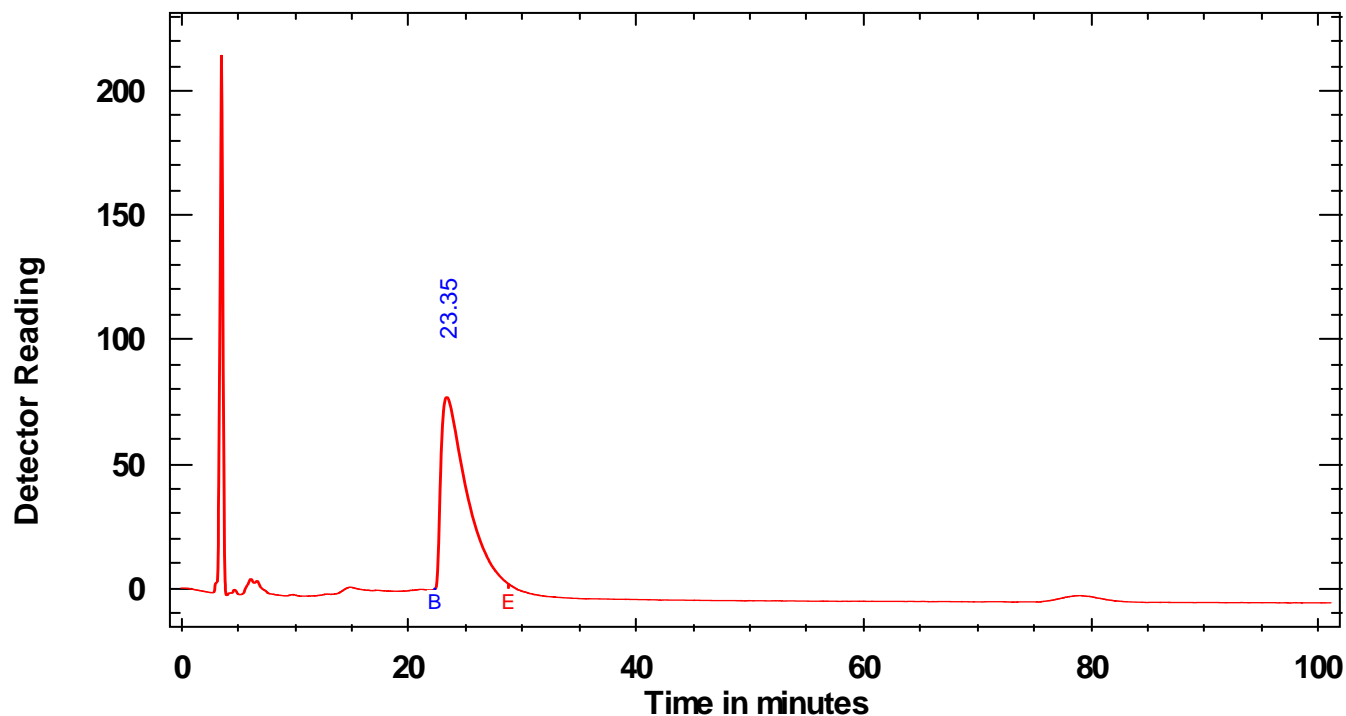

2009/9/30 02:20:05 Flow set to 1.00 at 0.00 minutes

2009/9/30 04:01:12 Run stopped by operator

## PEAK REPORT

| # | begin | end   | area  | percent | maximum | time  | begins as | name |
|---|-------|-------|-------|---------|---------|-------|-----------|------|
| 1 | 22.30 | 28.78 | 11950 | 100.0   | 76.93   | 23.35 | Baseline  |      |

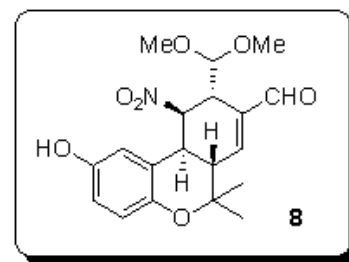



## Chromatogram Report

PMK-01-204-racemate+chiral-%ipa/hex-colm OD

Report produced on 2009/11/30 at 下午 04:20:35 by Put your name here

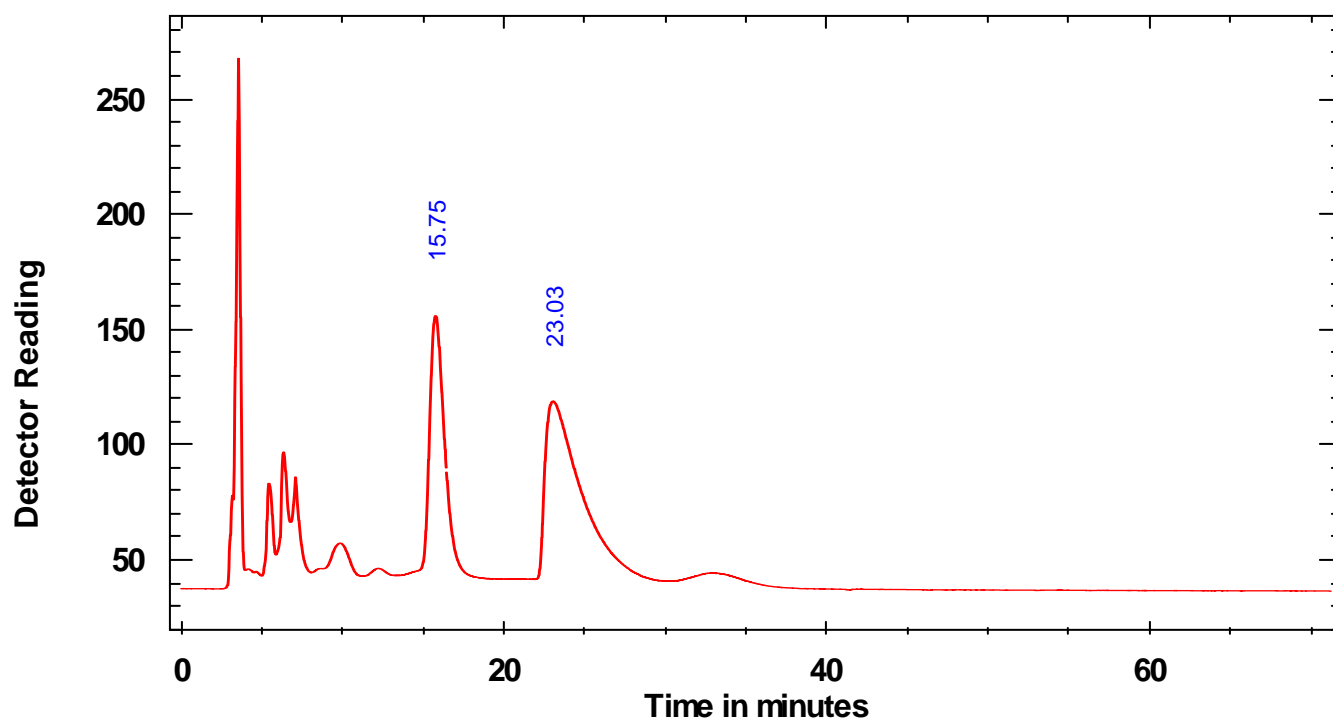

2009/9/30 04:58:46 Flow set to 1.00 at 0.00 minutes

2009/9/30 06:10:03 Run stopped by operator

### PEAK REPORT

| # | begin | end   | area  | percent | maximum | time  | begins as | name |
|---|-------|-------|-------|---------|---------|-------|-----------|------|
| 1 | 15.00 | 17.80 | 6676  | 37.1    | 86.84   | 15.77 | Baseline  |      |
| 2 | 22.02 | 28.06 | 11332 | 62.9    | 49.98   | 23.03 | Baseline  |      |

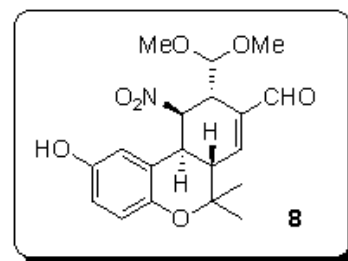



## Peak Report

PMK-01-72-CO-coltm-IA-8%-THF-Hex

Report produced on 2008/10/11 at 下午 04:24:49 by Put your name here

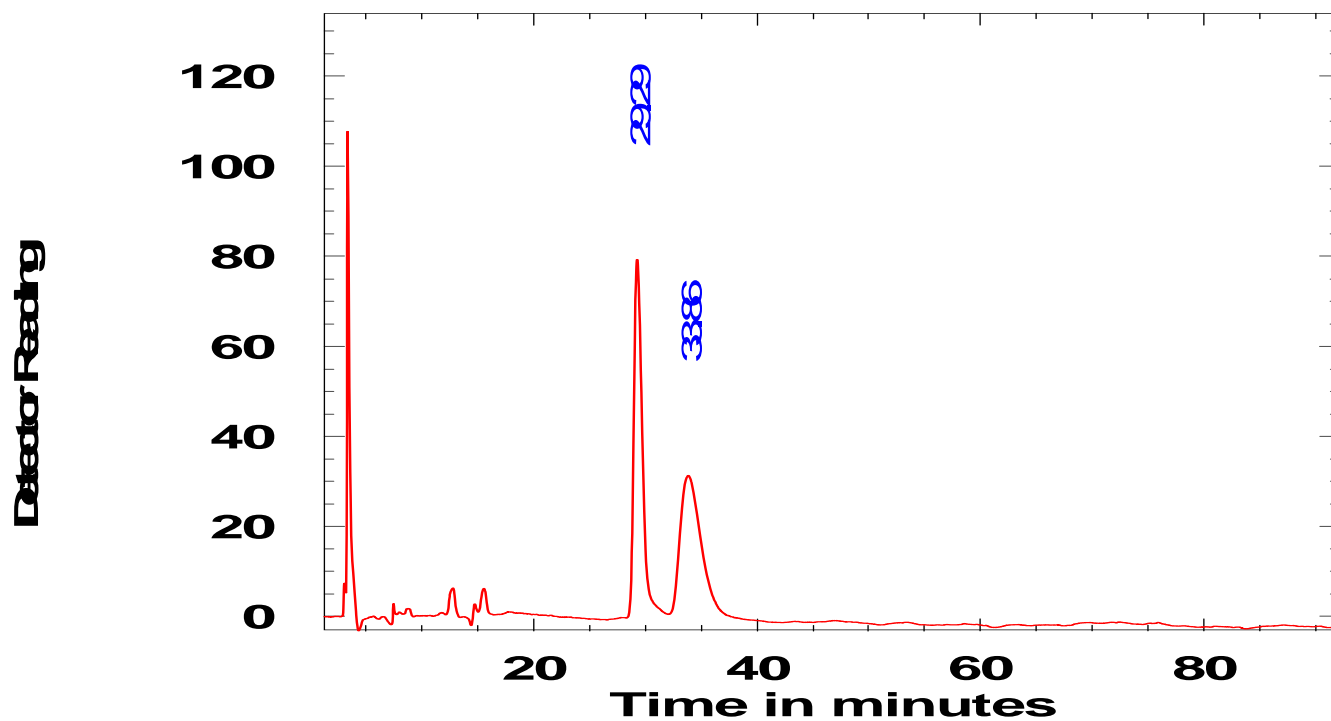

| Peak # | Begin | End   | Peak Area | Maximum | Time  | Area % | Begins as |
|--------|-------|-------|-----------|---------|-------|--------|-----------|
| 1      | 28.63 | 31.39 | 3844      | 79.25   | 29.29 | 49.3   | Baseline  |
| 2      | 32.03 | 37.52 | 3957      | 31.27   | 33.86 | 50.7   | Baseline  |

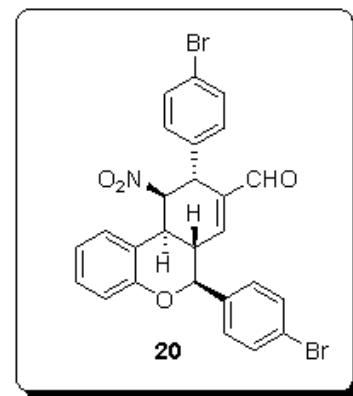



# Chromatogram Report

PMK-01-72-chiral-colum-IA-8%-THF-Hex

Report produced on 2008/10/11 at 下午 01:08:24 by Put your name here

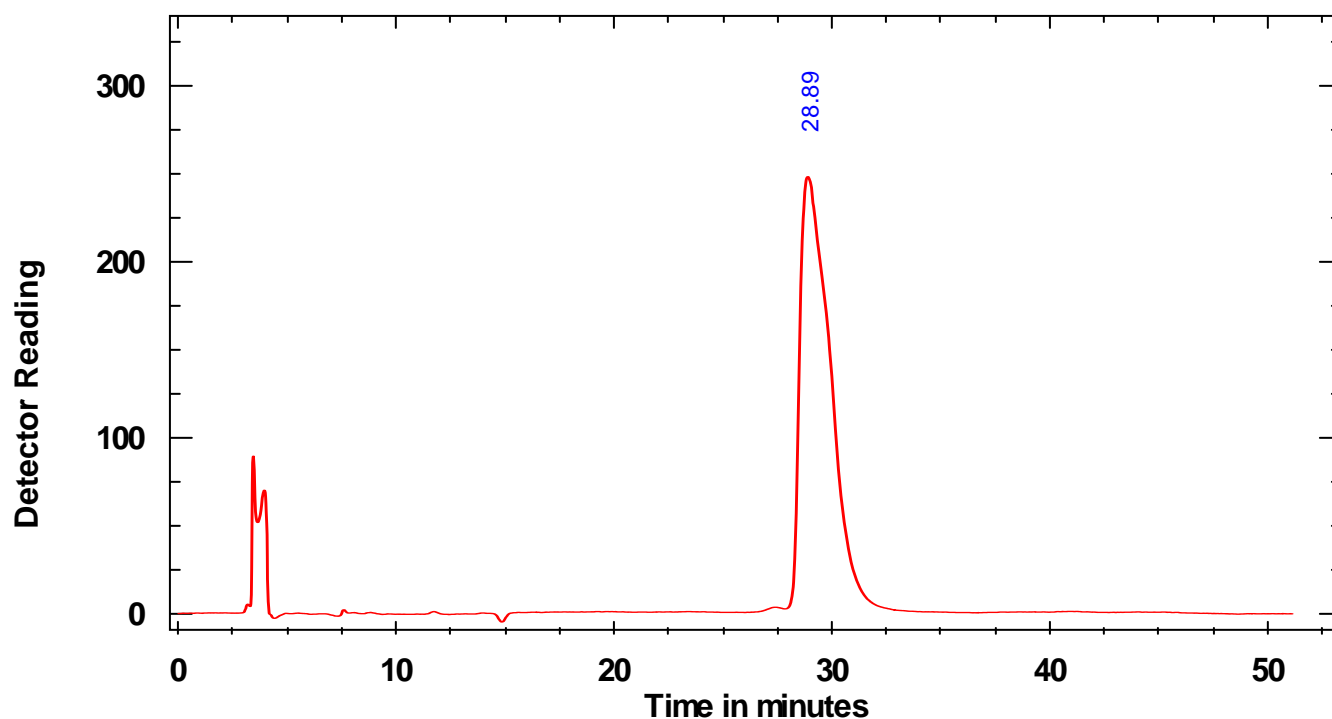

2008/10/11 12:14:49 Flow set to 1.00 at 0.00 minutes

2008/10/11 01:06:01 Run stopped by operator

## PEAK REPORT

| # | begin | end   | area | percent | maximum | time  | begins as | name |
|---|-------|-------|------|---------|---------|-------|-----------|------|
| 1 | 26.58 | 27.83 | 59   | 98.8    | 3.47    | 27.43 | Baseline  |      |

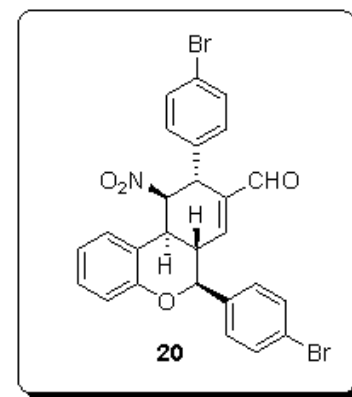

(For comparison)



## Peak Report

PMK-01-72-CO-collm-IA-8%-THF-Hex

Report produced on 2008/10/11 at 下午 02:20:16 by Put your name here

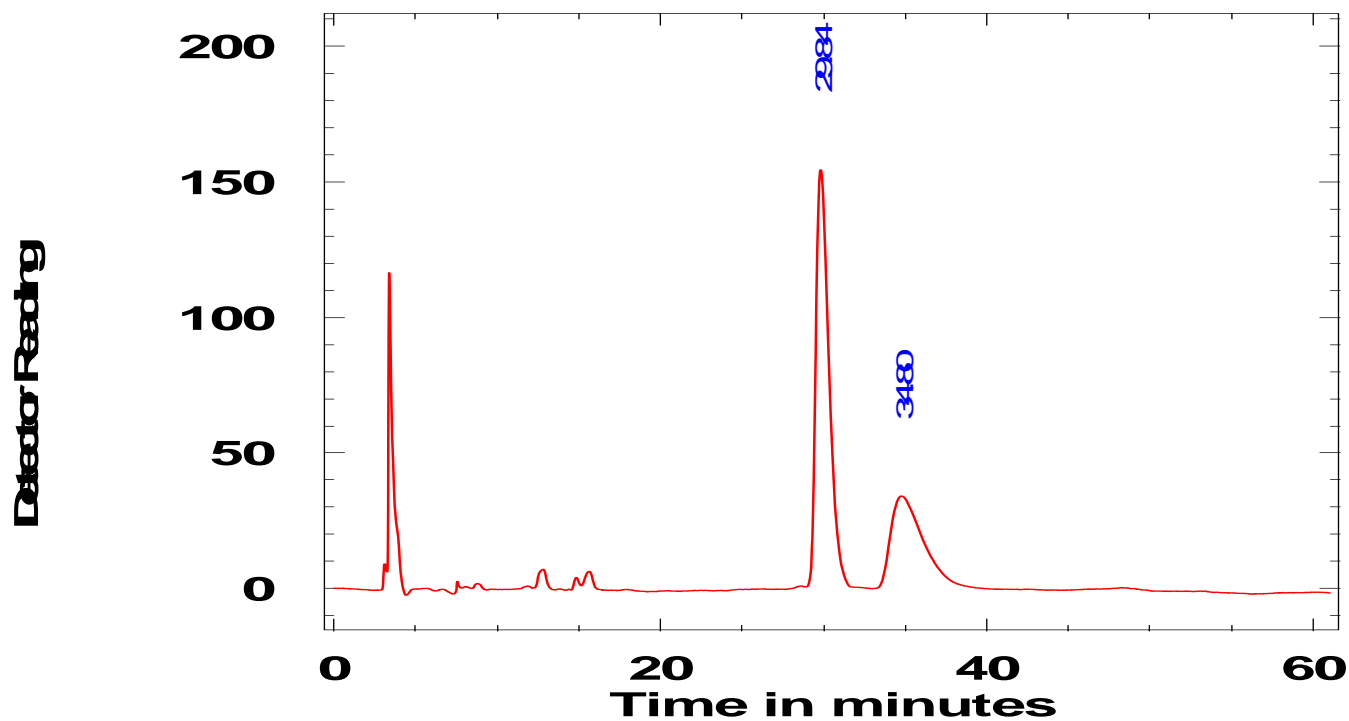

| Peak # | Begin | End   | Peak Area | Maximum | Time  | Area % | Begins as |
|--------|-------|-------|-----------|---------|-------|--------|-----------|
| 1      | 29.17 | 31.65 | 8393      | 154.39  | 29.84 | 69.2   | Baseline  |
| 2      | 33.34 | 37.24 | 3727      | 34.05   | 34.80 | 30.8   | Baseline  |

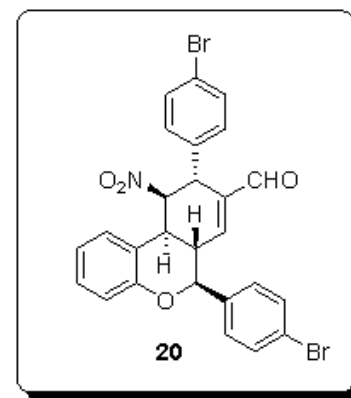



# Chromatogram Report

PMK--01-166-racemate-15%ipa/hex/colm/OD

Report produced on 2009/11/30 at 下午 04:13:01 by Put your name here

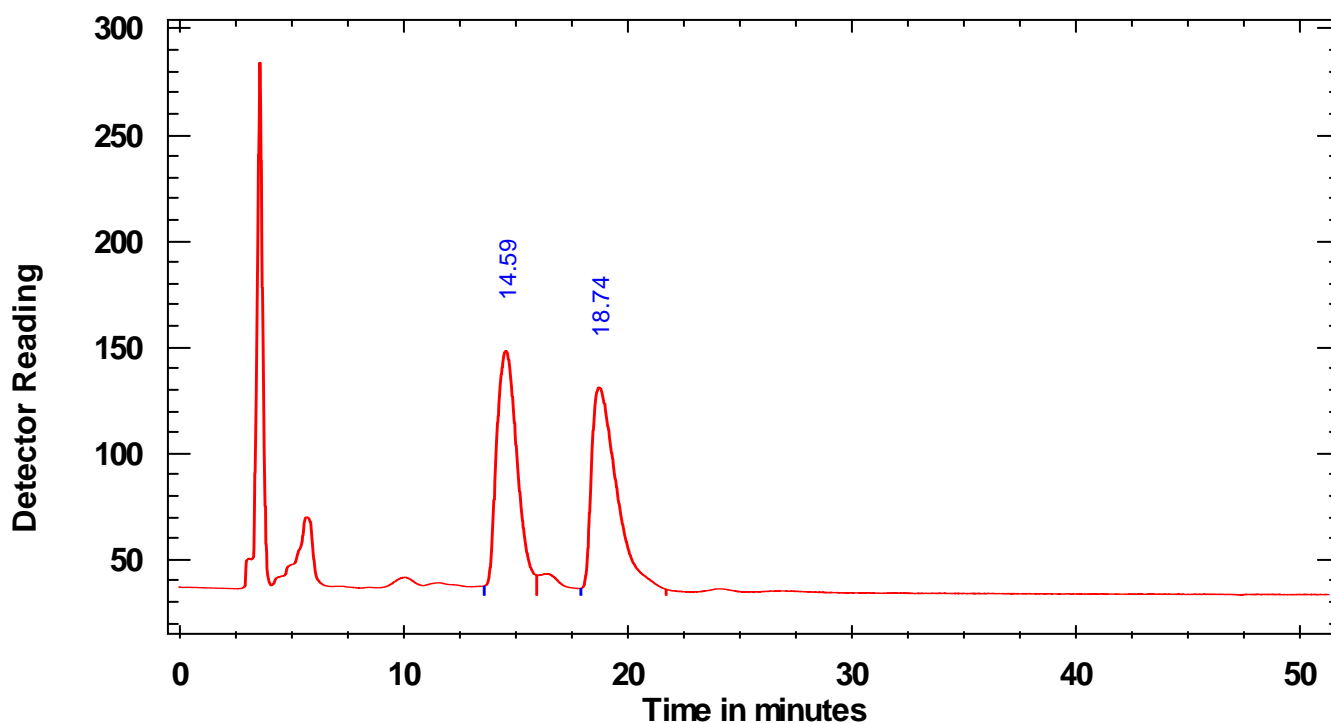

2009/10/15 02:21:07 Flow set to 1.00 at 0.00 minutes

2009/10/15 03:12:28 Run stopped by operator

## PEAK REPORT

| # | begin | end   | area | percent | maximum | time  | begins as | name |
|---|-------|-------|------|---------|---------|-------|-----------|------|
| 1 | 13.62 | 15.96 | 6548 | 47.3    | 148.18  | 14.59 | Baseline  |      |
| 2 | 17.93 | 21.74 | 7285 | 52.7    | 130.95  | 18.74 | Baseline  |      |

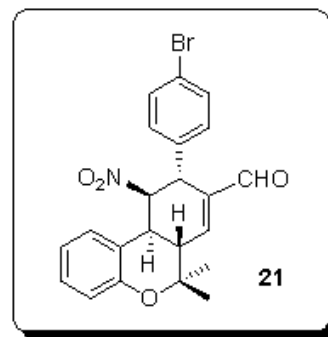



# Peak Report

PMK-01-166

Report produced on 2009/10/15 at 下午 04:00:49 by Put your name here

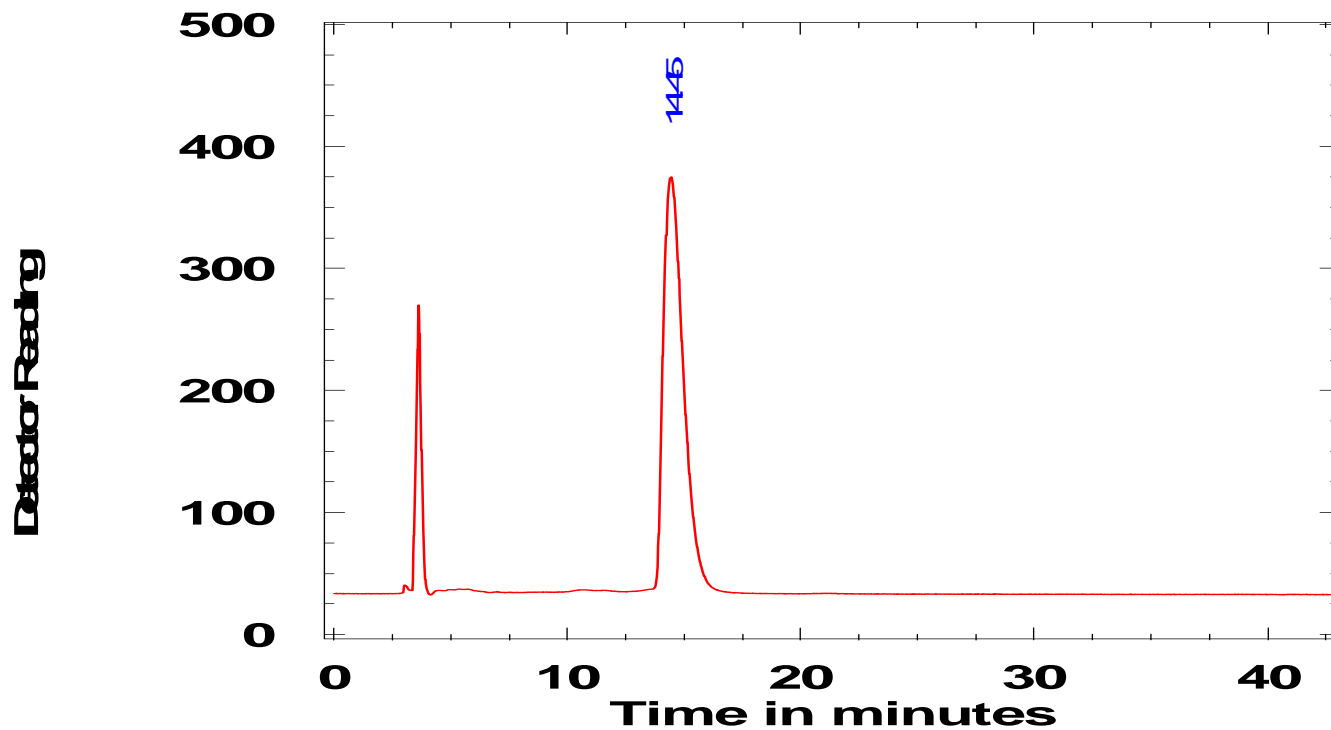

| Peak # | Begin | End   | Peak Area | Maximum | Time  | Area % | Begins as |
|--------|-------|-------|-----------|---------|-------|--------|-----------|
| 1      | 13.75 | 16.87 | 20019     | 374.94  | 14.45 | 100.0  | Baseline  |

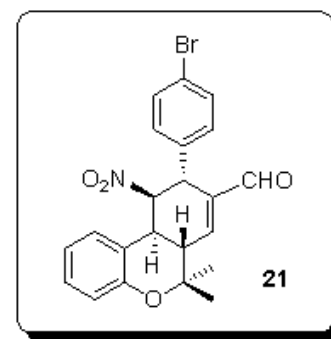



## Peak Report

PMK-01-166

Report produced on 2009/10/15 at 下午 05:21:10 by Put your name here

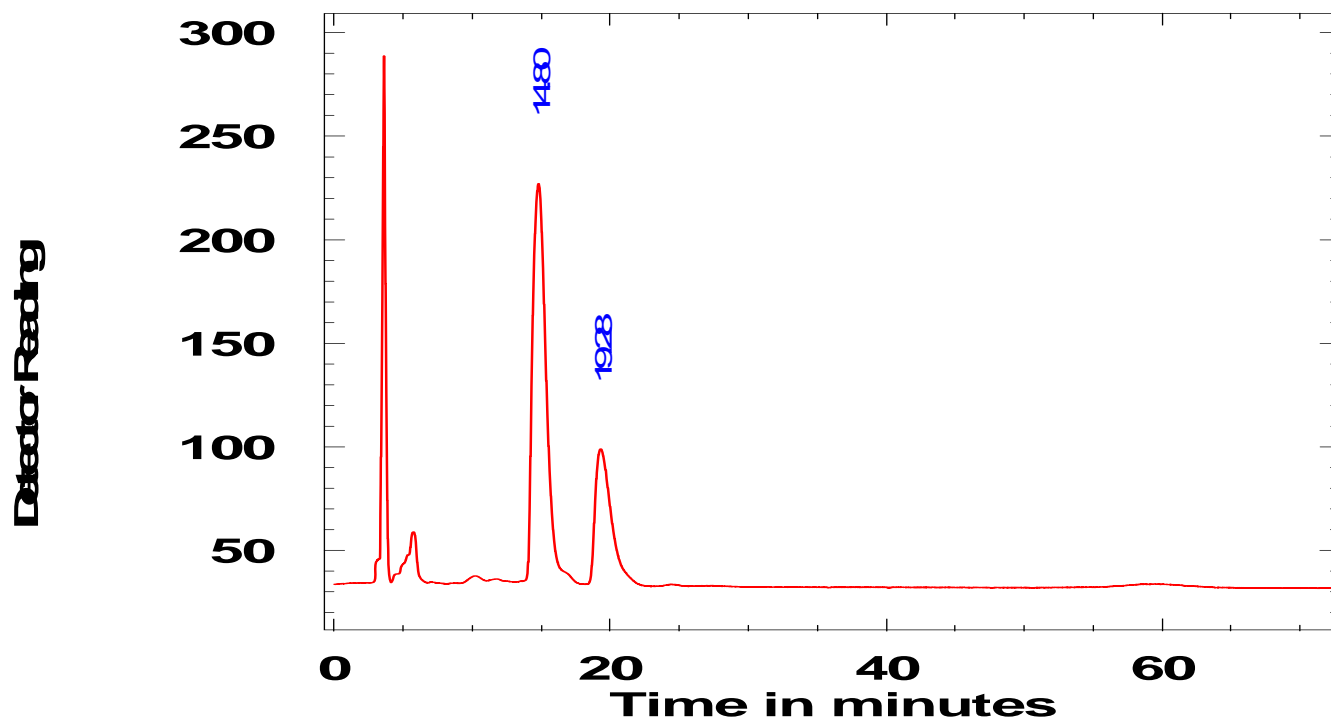

| Peak # | Begin | End   | Peak Area | Maximum | Time  | Area % | Begins as |
|--------|-------|-------|-----------|---------|-------|--------|-----------|
| 1      | 14.11 | 16.52 | 10961     | 227.10  | 14.80 | 72.0   | Baseline  |
| 2      | 18.61 | 21.13 | 4271      | 98.99   | 19.28 | 28.0   | Baseline  |

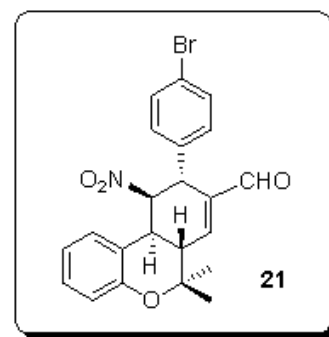

Supplement: Supplementary file 1 [file 4485190]
